# Supplementary material for: Biotechnological Potential of the Stress Response and Plant Cell Death Regulators Proteins in the Biofuel Industry
Source: Preprints.org preprint supplement (doi:10.20944/preprints202307.0303.v1), 2023-07-06
Supplement: Supplementary file 2 [file Additional file 2.xlsx]

## Sheet: Tab S. 1
Table S1. List of all genes encoding proteins identified in the Maldi-TOF analysis of 150 kDa protein fraction from Arabidopsis hypocotyls and roots samples of Col-0, Ws-0 and eds 1 mutants collected 7 days after start of root hypoxia stress.
Col-0
	AT4G02520.1	Glutathione S-transferase F2	GSTF2
	AT2G02930.1	Glutathione S-transferase F3	GSTF3			hypoxia stress mak
	AT1G35720.1	Annexin D1	ANN1			hypoxic metabolism
	AT3G14990.1	Protein DJ-1 homolog A	DJ1A			ROS scavenging enzymes
	AT1G02920.1	Glutathione S-transferase F7	GSTF7
	AT4G09000.1	14-3-3-like protein GF14 chi	GRF1
	At5g03630	Monodehydroascorbate reductase 2	MDAR2
	AT5G13420.1	Transaldolase	TRA2
	At5g16050	14-3-3-like protein GF14 upsilon	GRF5
	AT1G22300.1	14-3-3-like protein GF14 epsilon	GRF10
	AT1G35160.1	14-3-3-like protein GF14 phi	GRF4
	AT2G30870.1	Glutathione S-transferase F10	GSTF10
	AT3G02520.1	14-3-3-like protein GF14 nu	GRF7
	AT1G78300.1	14-3-3-like protein GF14 omega	GRF2
	AT2G47730.1	Glutathione S-transferase F8, chloroplastic	GSTF8
	AT1G75280.1	Isoflavone reductase homolog P3
	AT5G38480.1	14-3-3-like protein GF14 psi	GRF3
	At1g11840	Lactoylglutathione lyase GLX1	GLX1
	AT1G75040.1	Pathogenesis-related protein 5	PR-5
	AT2G30860.1	Glutathione S-transferase F9	GSTF9
	AT2G42590.1	14-3-3-like protein GF14 mu	GRF9
	AT3G55440.1	Triosephosphate isomerase, cytosolic	CTIMC
	AT5G10450.1	14-3-3-like protein GF14 lambda	GRF6
	AT4G08390.1	L-ascorbate peroxidase S, chloroplastic/mitochondrial	APXS
	AT5G65430.1	14-3-3-like protein GF14 kappa	GRF8
	AT1G60730.1	Probable aldo-keto reductase 5
	AT1G27450.1	Adenine phosphoribosyltransferase 1, chloroplastic	APT1
	AT2G36530.1	Bifunctional enolase 2/transcriptional activator	ENO2
	AT3G16400.1	Nitrile-specifier protein 1	NSP1
	AT4G34050.1	Caffeoyl-CoA O-methyltransferase 1	CCOAOMT1
	AT1G78380.1	Glutathione S-transferase U19	GSTU19
	AT3G62030.1	Peptidyl-prolyl cis-trans isomerase CYP20-3, chloroplastic	CYP20-3
	AT4G14030.1	Selenium-binding protein 1	SBP1
	AT5G57330.1	Glucose-6-phosphate 1-epimerase	MJB24.14
	AT1G19130.1	RmlC-like jelly roll fold protein
	AT4G27450.1	F27G19_50
	AT2G31390.1	Probable fructokinase-1
	AT1G07890.1	L-ascorbate peroxidase 1, cytosolic	APX1
	AT1G60690.1	Probable aldo-keto reductase 3
	AT2G21620.1	Adenine nucleotide alpha hydrolases-like superfamily protein	RD2
	AT4G03520.1	Thioredoxin M2, chloroplastic	TRXM2
	AT1G23820.1	Spermidine synthase 1	SPDSYN1
	AT3G20390.1	Reactive Intermediate Deaminase A, chloroplastic	RIDA
	AT1G77120.1	Alcohol dehydrogenase class-P	ADH1
	AT3G44300.1	Nitrilase 2	NIT2
	AT3G52930.1	Fructose-bisphosphate aldolase 8, cytosolic	FBA8
	AT4G23100.1	Glutamate--cysteine ligase, chloroplastic	GSH1
	AT3G44320.1	Nitrilase 3	NIT3
	AT2G04400.1	Indole-3-glycerol phosphate synthase, chloroplastic	IGPS
	AT1G62380.1	1-aminocyclopropane-1-carboxylate oxidase 2	ACO2
	AT4G20260.1	Plasma membrane-associated cation-binding protein 1	PCAP1
	AT2G33590.1	NAD(P)-binding Rossmann-fold superfamily protein	CRL1
	AT1G12230.1	Transaldolase
	AT1G08980.1	Amidase 1	AMI1
	AT1G56190.1	Phosphoglycerate kinase 2, chloroplastic
	AT4G08870.1	Arginase 2, chloroplastic/mitochondrial	ARGAH2
	AT1G70310.1	Spermidine synthase 2	SPDSYN2
	AT5G58070.1	Temperature-induced lipocalin-1	TIL
	AT4G13360.1	3-hydroxyisobutyryl-CoA hydrolase-like protein 3, mitochondrial
	AT2G41380.1	S-adenosyl-L-methionine-dependent methyltransferases superfamily protein
	AT4G27270.1	Probable NAD(P)H dehydrogenase (quinone) FQR1-like 1
	AT1G74230.1	Glycine-rich RNA-binding protein 5, mitochondrial	RBG5
	AT3G61440.1	Bifunctional L-3-cyanoalanine synthase/cysteine synthase C1, mitochondrial	CYSC1
	AT2G21170.1	Triosephosphate isomerase, chloroplastic	TIM
	AT2G37660.1	Uncharacterized protein At2g37660, chloroplastic
	AT2G23610.1	Methylesterase 3	MES3
	AT2G41530.1	S-formylglutathione hydrolase	SFGH
	AT3G54420.1	Endochitinase EP3	EP3
	AT4G39260.1	Glycine-rich RNA-binding protein 8	RBG8
	AT3G09940.1	Monodehydroascorbate reductase 3	MDAR3
	AT1G51680.1	4-coumarate--CoA ligase 1	4CL1
	AT2G39460.1	60S ribosomal protein L23a-1	RPL23AA
	AT1G17290.1	Alanine aminotransferase 1, mitochondrial	ALAAT1
	AT3G16420.1	PYK10-binding protein 1	PBP1
	AT5G60360.1	Thiol protease aleurain	ALEU
	AT1G79230.1	Thiosulfate/3-mercaptopyruvate sulfurtransferase 1, mitochondrial	STR1
	AT4G15210.1	Beta-amylase 5	BAM5
	AT3G12490.1	Cysteine proteinase inhibitor	CYSB
	AT1G74030.1	Enolase 1, chloroplastic	ENO1
	AT2G20630.1	Probable protein phosphatase 2C 20	PPC3-1.2
	AT1G08200.1	UDP-D-apiose/UDP-D-xylose synthase 2	AXS2
	AT4G17530.1	Ras-related protein RABD2c	RABD2C
	AT2G14260.1	Proline iminopeptidase	PIP
	AT5G36160.1	Tyrosine aminotransferase	TAT
	AT3G47000.1	Beta-glucosidase	F13I12.50
	AT5G20230.1	Blue copper protein	BCB
	AT1G77510.1	Protein disulfide isomerase-like 1-2	PDIL1-2
	AT5G42980.1	Thioredoxin H3	TRX3
	AT5G01600.1	Ferritin-1, chloroplastic	FER1
	AT5G19440.1	Epimerase domain-containing protein	AXX17_At5g19330
	AT3G17940.1	Aldose 1-epimerase
	AT1G09210.1	Calreticulin-2	CRT2
	AT1G74090.1	Cytosolic sulfotransferase 18	SOT18
	AT5G40370.1	Glutaredoxin-C2	GRXC2
	AT1G14210.1	Ribonuclease T(2)
	AT3G12390.1	Nascent polypeptide-associated complex subunit alpha-like protein 1
	AT1G07140.1	Ran-binding protein 1 homolog a	RANBP1A
Ws-0
	AT5G07440.1	Glutamate dehydrogenase 2	GDH2
	AT2G36460.1	Fructose-bisphosphate aldolase 6, cytosolic	FBA6
	AT2G37040.1	Phenylalanine ammonia-lyase 1	PAL1
	AT3G52930.1	Fructose-bisphosphate aldolase 8, cytosolic	FBA8
	AT5G18170.1	Glutamate dehydrogenase 1	GDH1
	AT3G53260.1	Phenylalanine ammonia-lyase 2	PAL2
	AT1G54100.1	Aldehyde dehydrogenase family 7 member B4	ALDH7B4
	AT5G11670.1	NADP-dependent malic enzyme 2	NADP-ME2
	AT2G14170.1	Methylmalonate-semialdehyde dehydrogenase [acylating], mitochondrial	ALDH6B2
	AT5G67360.1	Subtilisin-like protease SBT1.7	SBT1.7
	AT2G24200.1	Leucine aminopeptidase 1	LAP1
	AT3G02230.1	UDP-arabinopyranose mutase 1	RGP1
	AT5G54080.1	Homogentisate 1,2-dioxygenase	HGO
	AT4G02520.1	Glutathione S-transferase F2	GSTF2
	AT5G15650.1	UDP-arabinopyranose mutase 2	RGP2
	AT5G55480.1	Glycerophosphodiester phosphodiesterase GDPDL4	GDPDL4
	AT3G03910.1	Probable glutamate dehydrogenase 3	GSH3
	AT2G31390.1	Probable fructokinase-1
	AT5G13980.1	Probable alpha-mannosidase
	AT5G17920.1	5-methyltetrahydropteroyltriglutamate--homocysteine methyltransferase 1	MS1
	AT5G20960.1	Indole-3-acetaldehyde oxidase	AAO1
	AT3G03780.1	5-methyltetrahydropteroyltriglutamate--homocysteine methyltransferase 2	MS2
	AT1G65960.2	Glutamate decarboxylase 2	GAD2
	AT3G48000.1	Aldehyde dehydrogenase family 2 member B4, mitochondrial	ALDH2B4
	AT5G34940.2	Heparanase-like protein 3	GUS3
	AT5G12950.1	Proline-tRNA ligase (DUF1680)
	AT1G09750.1	Aspartyl protease AED3	AED3
	AT1G65930.1	Cytosolic isocitrate dehydrogenase [NADP]	CICDH
	AT4G16260.1	Probable glucan endo-1,3-beta-glucosidase
	AT5G02500.1	Heat shock 70 kDa protein 1	HSP70-1
	AT5G65750.1	Oxoglutarate dehydrogenase (succinyl-transferring)	MPA24.10
	AT5G64570.1	Beta-D-xylosidase 4	BXL4
	AT1G13440.1	Glyceraldehyde-3-phosphate dehydrogenase GAPC2, cytosolic	GAPC2
	AT5G21105.1	L-ascorbate oxidase
	AT3G54400.1	T12E18_90
	AT4G37870.1	Phosphoenolpyruvate carboxykinase (ATP) 1	PCK1
	AT3G14990.1	Protein DJ-1 homolog A	DJ1A
	AT1G04580.1	Aldehyde oxidase 4	AAO4
	AT5G64370.1	Beta-ureidopropionase	PYD3
	AT1G76160.1	sks5	sks5
	AT5G17330.1	Glutamate decarboxylase 1	GAD1
	AT4G18360.1	Peroxisomal (S)-2-hydroxy-acid oxidase GLO5	GLO5
	AT3G07390.1	Auxin-induced in root cultures protein 12	AIR12
	AT3G51260.1	Proteasome subunit alpha type-7-A	PAD1
	AT5G18470.1	Bulb-type lectin domain-containing protein
	AT4G31140.1	Glucan endo-1,3-beta-glucosidase 5
	AT1G35720.1	Annexin D1	ANN1
	AT4G16760.1	Peroxisomal acyl-coenzyme A oxidase 1	ACX1
	AT5G08670.1	ATP synthase subunit beta
	AT1G26380.1	Berberine bridge enzyme-like 3	FOX1
	AT4G27520.1	Early nodulin-like protein 2
	AT2G01140.1	Fructose-bisphosphate aldolase 3, chloroplastic	FBA3
	AT2G38380.1	Peroxidase 22	PER22
	AT3G09260.1	Beta-glucosidase 23	BGLU23
	AT1G79750.1	NADP-dependent malic enzyme 4, chloroplastic	NADP-ME4
	AT1G21880.1	LysM domain-containing GPI-anchored protein 1	LYM1
	AT1G04410.1	Malate dehydrogenase 1, cytoplasmic	MDH1
	AT3G20370.1	AT3g20370/MQC12_13
	AT4G33070.1	Pyruvate decarboxylase 1	PDC1
	AT5G54960.1	Pyruvate decarboxylase 2	PDC2
	AT4G34200.1	D-3-phosphoglycerate dehydrogenase 1, chloroplastic	PGDH1
	AT5G08370.1	Alpha-galactosidase 2	AGAL2
	AT1G20225.1	Thioredoxin superfamily protein	T20H2.2
	AT5G10560.1	Probable beta-D-xylosidase 6	BXL6
	AT2G25060.1	Early nodulin-like protein 1
	AT3G26720.1	Alpha-mannosidase
	AT1G23410.1	Ubiquitin-40S ribosomal protein S27a-1	RPS27AA
	AT3G14920.1	Peptide-N4-(N-acetyl-beta-glucosaminyl)asparagine amidase A protein
	AT1G11580.1	Pectinesterase/pectinesterase inhibitor 18	PME18
	AT1G23800.1	Aldehyde dehydrogenase family 2 member B7, mitochondrial	ALDH2B7
	AT4G13940.1	Adenosylhomocysteinase 1	SAHH1
	AT3G04720.1	Hevein-like preproprotein	HEL
	AT4G38220.1	N-acyl-L-amino-acid amidohydrolase	AQI
	AT3G16530.1	Lectin-like protein
	AT3G12500.1	Basic endochitinase B	CHI-B
	AT1G72370.1	40S ribosomal protein Sa-1	RPSaA
	AT5G39120.1	Germin-like protein subfamily 1 member 15
	AT2G27020.1	Proteasome subunit alpha type-3	PAG1
	AT1G74050.1	60S ribosomal protein L6-3	RPL6C
	AT5G16510.1	Probable UDP-arabinopyranose mutase 5	RGP5
	AT3G61440.1	Bifunctional L-3-cyanoalanine synthase/cysteine synthase C1, mitochondrial	CYSC1
	AT4G11010.1	Nucleoside diphosphate kinase III, chloroplastic/mitochondrial	NDPK3
	AT1G53850.1	Proteasome subunit alpha type-5-A	PAE1
	AT5G13120.1	Photosynthetic NDH subunit of lumenal location 5, chloroplastic	PNSL5
	AT5G25980.1	Myrosinase 2	TGG2
	AT5G07030.1	Eukaryotic aspartyl protease family protein	MOJ9.20
	AT2G37190.1	60S ribosomal protein L12-1	RPL12A
	AT1G18540.1	60S ribosomal protein L6-1	RPL6A
	AT1G47250.1	Proteasome subunit alpha type-1-B	PAF2
	AT1G61820.1	Beta-glucosidase 46	BGLU46
	AT3G32980.1	Peroxidase 32	PER32
	AT2G05710.1	Aconitate hydratase 3, mitochondrial	ACO3
	AT2G43560.1	Peptidyl-prolyl cis-trans isomerase FKBP16-3, chloroplastic	FKBP16-3
	AT4G31840.1	Early nodulin-like protein 15	ENODL15
	AT5G61410.1	Ribulose-5-phosphate-3-epimerase, chloroplastic	RPE
	AT1G16470.1	Proteasome subunit alpha type-2-A	PAB1
	AT5G25090.1	Early nodulin-like protein 3	At5g25090
	AT2G40010.1	60S acidic ribosomal protein P0-1	RPP0A
	AT1G44180.1	Aminoacylase, putative	T18F15.13
	AT3G26380.1	Alpha-galactosidase
	AT1G03220.1	Eukaryotic aspartyl protease family protein
	AT3G43600.1	Indole-3-acetaldehyde oxidase	AAO2
	AT2G37770.1	NADPH-dependent aldo-keto reductase, chloroplastic	AKR4C9
	AT3G02360.1	6-phosphogluconate dehydrogenase, decarboxylating 2	PGD2
	AT1G57720.1	Probable elongation factor 1-gamma 2	At1g57720
	AT3G13560.1	Glucan endo-1,3-beta-glucosidase 4
	AT1G66200.1	Glutamine synthetase cytosolic isozyme 1-2	GLN1-2
	AT1G64230.1	Ubiquitin-conjugating enzyme E2 28	UBC28
	AT1G22530.1	Patellin-2	PATL2
	AT3G20250.1	Pumilio homolog 5	APUM5
	AT3G03250.1	UTP--glucose-1-phosphate uridylyltransferase 2	UGP2
	AT4G34890.1	Xanthine dehydrogenase 1	XDH1
	AT1G66970.1	Glycerophosphodiester phosphodiesterase GDPDL1	GDPDL1
	AT2G22780.1	Malate dehydrogenase 1, peroxisomal	PMDH1
	AT2G05840.1	Proteasome subunit alpha type-6-B	PAA2
	AT1G24360.1	3-oxoacyl-[acyl-carrier-protein] reductase, chloroplastic	At1g24360
	AT3G22120.1	At3g22120	CWLP
	AT1G56070.1	Elongation factor 2	LOS1
	AT1G22300.1	14-3-3-like protein GF14 epsilon	GRF10
	AT1G53240.1	Malate dehydrogenase 1, mitochondrial	At1g53240
	AT4G09320.1	Nucleoside diphosphate kinase 1	NDK1
	AT5G62530.1	Delta-1-pyrroline-5-carboxylate dehydrogenase 12A1, mitochondrial	ALDH12A1
	AT5G11420.1	Uncharacterized protein At5g11420	At5g11420
	AT1G52570.1	Phospholipase D alpha 2	PLDALPHA2
	AT4G11650.1	Osmotin-like protein OSM34	OSM34
	AT4G15940.1	Probable acylpyruvase FAHD1, mitochondrial	FAHD1
	AT5G17380.1	2-hydroxyacyl-CoA lyase	HACL
	AT4G30150.1	Urb2/Npa2 family protein	At4g30150
	AT3G51800.1	ERBB-3 BINDING PROTEIN 1	EBP1
	AT4G23160.1	Cysteine-rich receptor-like protein kinase 8	CRK8
	AT1G79440.1	Succinate-semialdehyde dehydrogenase, mitochondrial	ALDH5F1
	AT5G42980.1	Thioredoxin H3	TRX3
	AT3G61490.1	Pectin lyase-like superfamily protein	F2A19.90
	AT1G54220.1	Dihydrolipoyllysine-residue acetyltransferase component 3 of pyruvate dehydrogenase complex, mitochondrial	At1g54220
	AT2G36580.1	Pyruvate kinase
	AT4G31300.1	Proteasome subunit beta type-6	PBA1
	AT1G78850.1	EP1-like glycoprotein 3	At1g78850
	AT1G79550.1	Phosphoglycerate kinase 3, cytosolic	PGK3
eds1 (Col-0)
	AT3G23990.1	Chaperonin CPN60, mitochondrial	CPN60
	AT1G78900.1	V-type proton ATPase catalytic subunit A	VHA-A
	AT3G02230.1	UDP-arabinopyranose mutase 1	RGP1
	AT5G42790.1	Proteasome subunit alpha type-1-A	PAF1
	AT2G27020.1	Proteasome subunit alpha type-3	PAG1
	AT1G47250.1	Proteasome subunit alpha type-1-B	PAF2
	AT2G33210.1	Chaperonin CPN60-like 1, mitochondrial
	AT5G35590.1	Proteasome subunit alpha type-6-A	PAA1
	AT3G51260.1	Proteasome subunit alpha type-7-A	PAD1
	AT5G15650.1	UDP-arabinopyranose mutase 2	RGP2
	AT1G13440.1	Glyceraldehyde-3-phosphate dehydrogenase GAPC2, cytosolic	GAPC2
	AT1G53850.1	Proteasome subunit alpha type-5-A	PAE1
	AT1G16470.1	Proteasome subunit alpha type-2-A	PAB1
	AT5G66140.1	Proteasome subunit alpha type-7-B	PAD2
	AT2G05840.1	Proteasome subunit alpha type-6-B	PAA2
	AT3G14290.1	Proteasome subunit alpha type-5-B	PAE2
	AT4G33070.1	Pyruvate decarboxylase 1	PDC1
	AT4G31300.1	Proteasome subunit beta type-6	PBA1
	AT3G60820.1	Proteasome subunit beta type-1	PBF1
	AT1G13060.1	Proteasome subunit beta type-5-A	PBE1
	AT1G56450.1	Proteasome subunit beta type-4	PBG1
	AT3G22110.1	Proteasome subunit alpha type-4-A	PAC1
	AT5G17920.1	5-methyltetrahydropteroyltriglutamate--homocysteine methyltransferase 1	MS1
	AT1G78850.1	EP1-like glycoprotein 3
	AT4G02520.1	Glutathione S-transferase F2	GSTF2
	AT5G56500.1	Chaperonin 60 subunit beta 3, chloroplastic	CPN60B3
	AT1G20260.1	V-type proton ATPase subunit B3	VHA-B3
	AT2G28000.1	Chaperonin 60 subunit alpha 1, chloroplastic	CPN60A1
	AT4G20830.1	Berberine bridge enzyme-like 19
	AT4G38510.1	V-type proton ATPase subunit B2	VHA-B2
	AT3G03780.1	5-methyltetrahydropteroyltriglutamate--homocysteine methyltransferase 2	MS2
	AT5G01600.1	Ferritin-1, chloroplastic	FER1
	AT1G78860.1	EP1-like glycoprotein 4
	AT3G26340.1	Proteasome subunit beta type-5-B	PBE2
	AT1G55490.1	Chaperonin 60 subunit beta 1, chloroplastic	CPN60B1
	AT5G02500.1	Heat shock 70 kDa protein 1	HSP70-1
	AT3G13860.1	Chaperonin CPN60-like 2, mitochondrial
	AT4G14800.1	Proteasome subunit beta type-2-B	PBD2
	ATCG00490.1	Ribulose bisphosphate carboxylase large chain	rbcL
	AT1G33120.1	60S ribosomal protein L9-1	RPL9B
	AT1G33590.1	Leucine-rich repeat (LRR) family protein
	AT5G54960.1	Pyruvate decarboxylase 2	PDC2
	AT3G22630.1	Proteasome subunit beta type-2-A	PBD1
	AT3G09440.1	Heat shock 70 kDa protein 3	HSP70-3
	AT3G09630.1	60S ribosomal protein L4-1	RPL4A
	AT1G21720.1	Proteasome subunit beta type-3-A	PBC1
	AT4G11150.1	V-type proton ATPase subunit E1	VHA-E1
	AT5G56010.1	Heat shock protein 90-3	HSP90-3
	AT1G20620.1	Catalase-3	CAT3
	AT1G43170.1	60S ribosomal protein L3-1	ARP1
	AT1G04690.1	Probable voltage-gated potassium channel subunit beta	KAB1
	AT1G74050.1	60S ribosomal protein L6-3	RPL6C
	AT5G09810.1	Actin-7	ACT7
	AT5G27850.1	60S ribosomal protein L18-3	RPL18C
	AT3G27430.2	Proteasome subunit beta type-7-A	PBB1
	AT2G35860.1	Fasciclin-like arabinogalactan protein 16	FLA16
	AT5G40580.1	Proteasome subunit beta type-7-B	PBB2
	AT5G02870.1	60S ribosomal protein L4-2	RPL4D
	AT2G18020.1	60S ribosomal protein L8-1	RPL8A
	AT2G44050.1	6,7-dimethyl-8-ribityllumazine synthase, chloroplastic
	AT3G03250.1	UTP--glucose-1-phosphate uridylyltransferase 2	UGP2
	AT5G20290.1	40S ribosomal protein S8-1	RPS8A
	AT2G01250.1	60S ribosomal protein L7-2	RPL7B
	AT3G54400.1	Peptidase A1 domain-containing protein	AXX17_At3g48830
	AT5G34940.2	Heparanase-like protein 3	GUS3 like
	AT2G38380.1	Peroxidase 22	PER22
	AT5G60160.1	AT5g60160/f15l12_20
	AT3G09840.1	Cell division control protein 48 homolog A	CDC48A
	AT4G13940.1	Adenosylhomocysteinase 1	SAHH1
	AT1G07920.1	Elongation factor 1-alpha 3	A3
	AT2G47610.1	60S ribosomal protein L7a-1	RPL7AA
	AT2G31390.1	Probable fructokinase-1
	AT3G32980.1	Peroxidase 32	PER32
	AT5G21105.1	L-ascorbate oxidase
	AT3G13930.1	Dihydrolipoyllysine-residue acetyltransferase component 2 of pyruvate dehydrogenase complex, mitochondrial
	AT1G41830.1	SKU5-similar 6	SKS6
	AT3G62870.1	60S ribosomal protein L7a-2	RPL7AB
	AT5G12950.1	Proline-tRNA ligase (DUF1680)
	AT5G13120.1	Photosynthetic NDH subunit of lumenal location 5, chloroplastic	PNSL5
	AT3G49010.1	60S ribosomal protein L13-1	RPL13B
	AT1G02920.1	Glutathione S-transferase F7	GSTF7
	AT1G57720.1	Probable elongation factor 1-gamma 2
	AT5G20010.1	GTP-binding nuclear protein Ran-1	RAN1
	AT2G44120.1	60S ribosomal protein L7-3	RPL7C
	AT4G19410.1	Pectin acetylesterase 7	PAE7
	AT1G09640.1	Probable elongation factor 1-gamma 1
	AT1G50480.1	Formate--tetrahydrofolate ligase	THFS
	AT2G37770.2	NADPH-dependent aldo-keto reductase, chloroplastic	AKR4C9
	AT1G03220.1	Eukaryotic aspartyl protease family protein
	AT1G28290.1	Non-classical arabinogalactan protein 31	AGP31
	AT3G14990.1	Protein DJ-1 homolog A	DJ1A
	AT2G45220.1	Probable pectinesterase/pectinesterase inhibitor 17	PME17
	AT3G04840.1	40S ribosomal protein S3a-1	RPS3AA
	AT5G45280.2	Pectin acetylesterase 11	PAE11
	AT1G18540.1	60S ribosomal protein L6-1	RPL6A
	AT5G07830.1	Heparanase-like protein 1	GUS1 like
	AT1G09750.1	Aspartyl protease AED3	AED3
	AT1G77120.1	Alcohol dehydrogenase class-P	ADH1
	AT5G28540.1	Heat shock 70 kDa protein BIP1	BIP1
	AT3G61440.1	Bifunctional L-3-cyanoalanine synthase/cysteine synthase C1, mitochondrial	CYSC1
	AT1G23410.1	Ubiquitin-40S ribosomal protein S27a-1	RPS27AA
	AT1G65900.1	At1g65900/F12P19_7
	AT2G34480.1	60S ribosomal protein L18a-2	RPL18AB
	AT4G20850.1	Tripeptidyl-peptidase 2	TPP2
	AT2G17360.1	40S ribosomal protein S4-1	RPS4A
	AT3G52930.1	Fructose-bisphosphate aldolase 8, cytosolic	FBA8
	AT1G22780.1	40S ribosomal protein S18	RPS18A
	AT5G18470.1	Bulb-type lectin domain-containing protein	ARALYDRAFT_488726
	AT2G37040.1	Phenylalanine ammonia-lyase 1	PAL1
	AT3G63190.1	Ribosome-recycling factor, chloroplastic	RRF
	AT1G24360.1	3-oxoacyl-[acyl-carrier-protein] reductase, chloroplastic
	AT5G08670.1	ATP synthase subunit beta
	AT4G16720.1	60S ribosomal protein L15-1	RPL15A
	AT5G07030.1	Eukaryotic aspartyl protease family protein	MOJ9.20
	AT1G55090.1	Glutamine-dependent NAD(+) synthetase
	AT2G07698.1	ATP synthase subunit alpha, mitochondrial
	AT4G15165.1	Putative proteasome subunit alpha type-4-B	PAC2
	AT2G18150.1	Peroxidase 15	PER15
	AT5G15200.1	40S ribosomal protein S9-1	RPS9B
	AT3G16530.1	Lectin-like protein At3g16530
	AT3G04920.1	40S ribosomal protein S24-1	RPS24A
	AT5G08370.1	Alpha-galactosidase 2	AGAL2
	AT3G49910.1	60S ribosomal protein L26-1	RPL26A
	AT2G31610.1	40S ribosomal protein S3-1	RPS3A
	AT4G31700.1	40S ribosomal protein S6-1	RPS6A
	AT5G50850.1	Pyruvate dehydrogenase E1 component subunit beta-1, mitochondrial	PDH2
	AT2G42740.1	60S ribosomal protein L11-1	RPL11A
	AT1G49750.1	AT1G49750 protein
	AT1G14320.1	60S ribosomal protein L10-1	RPL10A
	AT1G65960.1	Glutamate decarboxylase 2	GAD2
	AT5G19550.1	Aspartate aminotransferase, cytoplasmic isozyme 1	ASP2
	AT4G27090.1	60S ribosomal protein L14-2	RPL14B
	AT3G25520.1	60S ribosomal protein L5-1	RPL5A
	AT5G13690.1	Alpha-N-acetylglucosaminidase	NAGLU
	AT3G03960.1	T-complex protein 1 subunit theta	CCT8
	AT3G09260.1	Beta-glucosidase 23	BGLU23
	AT4G36430.1	Peroxidase 49	PER49
	AT4G20890.1	Tubulin beta-9 chain	TUBB9
	AT2G37270.1	40S ribosomal protein S5-1	RPS5A
	AT2G37190.1	60S ribosomal protein L12-1	RPL12A
	AT3G52370.1	Fasciclin-like arabinogalactan protein 15	FLA15
	AT2G40300.1	Ferritin-4, chloroplastic	FER4
	AT1G23290.1	60S ribosomal protein L27a-2	RPL27AB
	AT4G01870.1	TolB protein-like protein
	AT1G47960.1	Cell wall / vacuolar inhibitor of fructosidase 1	C/VIF1
	AT4G26270.1	ATP-dependent 6-phosphofructokinase 3	PFK3
	AT1G65930.1	Cytosolic isocitrate dehydrogenase [NADP]	CICDH
	AT3G05560.1	60S ribosomal protein L22-2	RPL22B
	AT3G07110.1	60S ribosomal protein L13a-1	RPL13AA
	AT1G72370.1	40S ribosomal protein Sa-1	RPSaA
	AT1G18080.1	Receptor for activated C kinase 1A	RACK1A
	AT1G79550.1	Phosphoglycerate kinase 3, cytosolic	PGK3
	AT2G30860.1	Glutathione S-transferase F9	GSTF9
	AT1G31670.1	Precursor of CEP12	CEP12
	AT2G41840.1	40S ribosomal protein S2-3	RPS2C
	AT2G01140.1	Fructose-bisphosphate aldolase 3, chloroplastic	FBA3
	AT3G02080.1	40S ribosomal protein S19-1	RPS19A
	AT3G11510.1	40S ribosomal protein S14-2	RPS14B
	AT2G39460.1	60S ribosomal protein L23a-1	RPL23AA
	AT4G25740.1	40S ribosomal protein S10-1	RPS10A
	AT2G36160.1	40S ribosomal protein S14-1	RPS14A
	AT5G39850.1	40S ribosomal protein S9-2	RPS9C
	AT1G04820.1	Tubulin alpha-4 chain	TUBA4
	AT3G43190.1	Sucrose synthase 4	SUS4
	AT2G47550.1	Probable pectinesterase/pectinesterase inhibitor 20	PME20
	AT3G49120.1	Peroxidase 34	PER34
	AT3G60770.1	40S ribosomal protein S13-1	RPS13A
	AT4G15000.1	60S ribosomal protein L27-3	RPL27C
	AT4G16760.1	Peroxisomal acyl-coenzyme A oxidase 1	ACX1
	AT1G07660.1	Histone H4
	AT3G20050.1	T-complex protein 1 subunit alpha	CCT1
	AT3G11830.1	T-complex protein 1 subunit eta	CCT7
	AT5G06390.1	Fasciclin-like arabinogalactan protein 17	FLA17
	AT5G66120.1	3-dehydroquinate synthase, chloroplastic	DHQS
	AT3G12500.1	Basic endochitinase B	CHI-B
	AT2G20580.1	26S proteasome non-ATPase regulatory subunit 2 homolog A	RPN1A
	AT5G11670.1	NADP-dependent malic enzyme 2	NADP-ME2
	AT1G67090.1	Ribulose bisphosphate carboxylase small subunit 1A, chloroplastic	RBCS-1A
	AT4G31140.1	Glucan endo-1,3-beta-glucosidase 5
	AT3G02360.1	6-phosphogluconate dehydrogenase, decarboxylating 2	PGD2
	AT3G12145.1	Leucine-rich repeat protein FLOR 1	FLR1
	AT1G20200.1	26S proteasome non-ATPase regulatory subunit 3 homolog A	RPN3A
	AT1G31710.1	Amine oxidase
	AT5G44400.1	Berberine bridge enzyme-like 26
	AT5G12110.1	Elongation factor 1-beta 1
	AT2G40010.1	60S acidic ribosomal protein P0-1	RPP0A
	AT5G27770.1	60S ribosomal protein L22-3	RPL22C
	AT5G58390.1	Peroxidase 67	PER67
	AT5G67360.1	Subtilisin-like protease SBT1.7	SBT1.7
	AT5G20830.1	Sucrose synthase 1	SUS1
	AT1G45000.1	26S proteasome regulatory subunit S10B homolog B	RPT4B
	AT4G34670.1	40S ribosomal protein S3a-2	RPS3AB
	AT3G15356.1	Lectin-like protein LEC	LEC
	AT1G35160.1	14-3-3-like protein GF14 phi	GRF4
	AT1G36240.1	Putative 60S ribosomal protein L30-1	RPL30A
	AT5G09900.1	26S proteasome non-ATPase regulatory subunit 12 homolog A	RPN5A
	AT4G13930.1	Serine hydroxymethyltransferase 4	SHM4
	AT1G14610.1	Valine--tRNA ligase, mitochondrial 1	TWN2
	AT3G22230.1	60S ribosomal protein L27-2	RPL27B
	AT3G06650.1	ATP-citrate synthase beta chain protein 1	ACLB-1
	AT3G56090.1	Ferritin-3, chloroplastic	FER3
	AT1G27400.1	60S ribosomal protein L17-1	RPL17A
	AT4G27450.1	Aluminum induced protein with YGL and LRDR motifs	AT4g27450/F27G19_50
	AT3G01390.1	V-type proton ATPase subunit G1	VHA-G1
	AT1G04410.1	Malate dehydrogenase 1, cytoplasmic	MDH1
	AT3G48930.1	40S ribosomal protein S11-1	RPS11A
	AT1G30230.1	Elongation factor 1-delta 1
	AT5G23740.1	40S ribosomal protein S11-3	RPS11C
	AT1G30700.1	Berberine bridge enzyme-like 8
	AT5G16510.1	Probable UDP-arabinopyranose mutase 5	RGP5
	AT2G40510.1	40S ribosomal protein S26-2	RPS26B
	AT3G04230.1	40S ribosomal protein S16-2	RPS16B
	AT3G46440.1	UDP-glucuronic acid decarboxylase 5	UXS5
	AT3G26380.1	Alpha-galactosidase
	AT2G16060.1	Non-symbiotic hemoglobin 1	AHB1
	AT1G07770.1	40S ribosomal protein S15a-1	RPS15AA
	AT3G45030.1	40S ribosomal protein S20-1	RPS20A
	AT5G28060.1	40S ribosomal protein S24-2	RPS24B
	AT3G10950.1	Putative 60S ribosomal protein L37a-1	RPL37AB
	AT5G20990.1	Molybdopterin biosynthesis protein CNX1	CNX1
	AT1G54220.1	Dihydrolipoyllysine-residue acetyltransferase component 3 of pyruvate dehydrogenase complex, mitochondrial
	AT2G16600.1	Peptidyl-prolyl cis-trans isomerase CYP19-1	CYP19-1
	AT1G53070.1	Lectin-like protein At1g53070
	AT4G37800.1	Probable xyloglucan endotransglucosylase/hydrolase protein 7	XTH7
	AT1G09590.1	60S ribosomal protein L21-1	RPL21A
	AT1G44542.1	Cyclase-like protein 3	CYCLASE3
	AT1G02780.1	60S ribosomal protein L19-1	RPL19A
	AT3G51800.1	ERBB-3 BINDING PROTEIN 1	EBP1
	AT2G39390.1	60S ribosomal protein L35-2	RPL35B
	AT3G24830.1	60S ribosomal protein L13a-2	RPL13AB
	AT1G54000.1	GDSL esterase/lipase 22	GLL22
	AT1G26880.1	60S ribosomal protein L34-1	RPL34A
	AT4G24820.1	26S proteasome non-ATPase regulatory subunit 6 homolog	RPN7
	AT1G53280.1	Protein DJ-1 homolog B	DJ1B
	AT3G58730.1	V-type proton ATPase subunit D	VHA-D
	AT3G53020.1	60S ribosomal protein L24-2	RPL24B
	AT3G06850.1	Lipoamide acyltransferase component of branched-chain alpha-keto acid dehydrogenase complex, mitochondrial	BCE2
	AT1G07790.1	Histone H2B.1
	AT2G33040.1	ATP synthase subunit gamma, mitochondrial	ATPC
	AT2G17630.1	Phosphoserine aminotransferase 2, chloroplastic	PSAT2
	AT1G54270.1	Eukaryotic initiation factor 4A-2	TIF4A-2
	AT2G27710.1	60S acidic ribosomal protein P2-2	RPP2B
	AT1G72150.1	Patellin-1	PATL1
	AT2G26080.1	Glycine dehydrogenase (decarboxylating) 2, mitochondrial	GLDP2
	AT4G12880.1	AtENODL19	AtENODL19
	AT3G06860.1	Peroxisomal fatty acid beta-oxidation multifunctional protein MFP2	MFP2
	AT2G06850.1	Xyloglucan endotransglucosylase/hydrolase protein 4	XTH4
	AT3G53740.1	60S ribosomal protein L36-2	RPL36B
	AT1G12840.1	V-type proton ATPase subunit C	VHA-C
	AT1G35580.1	Alkaline/neutral invertase CINV1	CINV1
	AT5G19990.1	26S proteasome regulatory subunit 8 homolog A	RPT6A
	AT2G16360.1	40S ribosomal protein S25-1	RPS25A
	AT1G56070.1	Elongation factor 2	LOS1
	AT5G23540.1	26S proteasome non-ATPase regulatory subunit 14 homolog	RPN11
	AT1G04480.1	60S ribosomal protein L23	RPL23A
	AT5G63810.1	Beta-galactosidase 10	BGAL10
	AT1G78060.1	Probable beta-D-xylosidase 7	BXL7
	AT1G24510.1	T-complex protein 1 subunit epsilon	CCT5
	AT2G37760.1	Aldo-keto reductase family 4 member C8	AKR4C8
	AT4G26910.1	Dihydrolipoyllysine-residue succinyltransferase component of 2-oxoglutarate dehydrogenase complex 2, mitochondrial	At4g26910
	AT5G57020.1	Glycylpeptide N-tetradecanoyltransferase 1	NMT1
	AT2G36580.1	Pyruvate kinase
	AT4G32520.1	Serine hydroxymethyltransferase 3, chloroplastic	SHM3
	AT1G32480.1	Putative isocitrate dehydrogenase [NAD] subunit-like 4	IDH4
	AT3G59010.1	Probable pectinesterase/pectinesterase inhibitor 35	PME35
	AT4G11010.1	Nucleoside diphosphate kinase III, chloroplastic/mitochondrial	NDPK3
	AT4G18100.1	60S ribosomal protein L32-1	RPL32A
	AT1G48830.1	40S ribosomal protein S7-1	RPS7A
	AT5G04710.1	Aspartyl aminopeptidase	T1E3_70
	AT5G59880.1	Actin-depolymerizing factor 3	ADF3
	AT2G05710.1	Aconitate hydratase 3, mitochondrial	ACO3
	AT3G09500.1	60S ribosomal protein L35-1	RPL35A
	AT1G53750.1	26S proteasome regulatory subunit 7 homolog A	RPT1A
	AT3G10920.1	Superoxide dismutase [Mn] 1, mitochondrial	MSD1
	AT1G09780.1	2,3-bisphosphoglycerate-independent phosphoglycerate mutase 1	PGM1
	AT5G11420.1	Uncharacterized protein At5g11420
	AT3G18070.1	Beta-glucosidase 43	BGLU43
	AT3G52880.1	Monodehydroascorbate reductase 1, peroxisomal	MDAR1
	AT4G16660.1	Heat shock 70 kDa protein 17	HSP70-17
	AT1G11580.1	Pectinesterase/pectinesterase inhibitor 18	PME18
	AT3G14415.1	(S)-2-hydroxy-acid oxidase GLO2	GLO2
	AT4G31990.1	Aspartate aminotransferase, chloroplastic	ASP5
	AT1G66200.1	Glutamine synthetase cytosolic isozyme 1-2	GLN1-2
	AT3G52200.1	Dihydrolipoyllysine-residue acetyltransferase component 1 of pyruvate dehydrogenase complex, mitochondrial	LTA3
	AT3G16470.1	Jacalin-related lectin 35	JAL35
	AT5G46430.1	60S ribosomal protein L32-2	RPL32B
	AT3G22060.1	Cysteine-rich repeat secretory protein 38	CRRSP38
	AT4G37870.1	Phosphoenolpyruvate carboxykinase (ATP) 1	PCK1
	AT1G26380.1	Berberine bridge enzyme-like 3	FOX1
	AT4G34200.1	D-3-phosphoglycerate dehydrogenase 1, chloroplastic	PGDH1
	AT4G16260.1	Probable glucan endo-1,3-beta-glucosidase At4g16260
	AT3G02560.1	40S ribosomal protein S7-2	RPS7B
	AT1G21880.1	LysM domain-containing GPI-anchored protein 1	LYM1
	AT5G16390.1	Biotin carboxyl carrier protein of acetyl-CoA carboxylase 1, chloroplastic	BCCP1
	AT1G09200.1	Histone H3.2	HTR2
	AT1G03475.1	Coproporphyrinogen-III oxidase 1, chloroplastic	CPX1
	AT2G05920.1	Subtilisin-like protease SBT1.8	SBT1.8
	AT2G42710.1	Ribosomal protein L1p/L10e family
	AT1G78380.1	Glutathione S-transferase U19	GSTU19
	AT5G41520.1	40S ribosomal protein S10-2	RPS10B
	AT5G39120.1	Germin-like protein subfamily 1 member 15	At5g39120
	AT3G08580.1	ADP,ATP carrier protein 1, mitochondrial	AAC1
	AT5G14780.1	Formate dehydrogenase, chloroplastic/mitochondrial	FDH1
	AT1G07070.1	60S ribosomal protein L35a-1	RPL35AA
	AT1G02800.1	Endoglucanase 1	CEL2
	AT2G21130.1	Peptidyl-prolyl cis-trans isomerase CYP19-2	CYP19-2
	AT4G34870.1	Peptidyl-prolyl cis-trans isomerase CYP18-4	CYP18-4
	AT3G20250.1	Pumilio homolog 5	APUM5
	AT1G15250.1	60S ribosomal protein L37-1	RPL37A
	AT3G11270.1	26S proteasome non-ATPase regulatory subunit 7 homolog B	RPN8B
	AT5G16070.1	T-complex protein 1 subunit zeta 2	CCT6B
	AT1G49780.1	U-box domain-containing protein 26	PUB26
	AT1G08360.1	60S ribosomal protein L10a-1	RPL10AA
	AT4G02930.1	Elongation factor Tu, mitochondrial	TUFA
	AT5G43940.1	Alcohol dehydrogenase class-3	ADH2
	AT3G04720.1	Hevein-like preproprotein	HEL
	AT5G26710.1	Glutamate--tRNA ligase, cytoplasmic
	AT1G23190.1	Probable phosphoglucomutase, cytoplasmic 1
	AT1G29150.1	26S proteasome non-ATPase regulatory subunit 11 homolog	RPN6
	AT5G58270.1	ABC transporter B family member 25, mitochondrial	ABCB25
	AT4G34450.1	Coatomer subunit gamma
	AT5G10770.1	Aspartyl protease family protein
	AT5G49190.1	Sucrose synthase 2	SUS2
eds1 (Ws-0)
	AT2G37040.1	Phenylalanine ammonia-lyase 1	PAL1
	AT5G07440.1	Glutamate dehydrogenase 2	GDH2
	AT2G24200.1	Leucine aminopeptidase 1	LAP1
	AT3G53260.1	Phenylalanine ammonia-lyase 2	PAL2
	AT5G11670.1	NADP-dependent malic enzyme 2	NADP-ME2
	AT3G52930.1	Fructose-bisphosphate aldolase 8, cytosolic	FBA8
	AT2G36460.1	Fructose-bisphosphate aldolase 6, cytosolic	FBA6
	AT5G18170.1	Glutamate dehydrogenase 1	GDH1
	AT5G13980.1	Probable alpha-mannosidase
	AT4G30920.1	Leucine aminopeptidase 2, chloroplastic	LAP2
	AT1G20620.1	Catalase-3	CAT3
	AT3G48000.1	Aldehyde dehydrogenase family 2 member B4, mitochondrial	ALDH2B4
	AT2G14170.1	Methylmalonate-semialdehyde dehydrogenase [acylating], mitochondrial	ALDH6B2
	AT3G10340.1	Phenylalanine ammonia-lyase 4	PAL4
	AT3G26720.1	Alpha-mannosidase
	AT1G54100.1	Aldehyde dehydrogenase family 7 member B4	ALDH7B4
	AT5G02500.1	Heat shock 70 kDa protein 1	HSP70-1
	AT5G12950.1	Proline-tRNA ligase (DUF1680)	At5g12950
	AT5G17920.1	5-methyltetrahydropteroyltriglutamate--homocysteine methyltransferase 1	MS1
	AT5G65750.1	Oxoglutarate dehydrogenase (succinyl-transferring)	MPA24.10
	AT5G20960.1	Indole-3-acetaldehyde oxidase	AAO1
	AT3G09440.1	Heat shock 70 kDa protein 3	HSP70-3
	AT3G12580.1	Heat shock 70 kDa protein 4	HSP70-4
	AT3G02230.1	UDP-arabinopyranose mutase 1	RGP1
	AT1G57720.1	Probable elongation factor 1-gamma 2	At1g57720
	AT1G65960.2	Glutamate decarboxylase 2	GAD2
	AT3G09260.1	Beta-glucosidase 23	BGLU23
	AT5G67360.1	Subtilisin-like protease SBT1.7	SBT1.7
	AT4G02520.1	Glutathione S-transferase F2	GSTF2
	AT1G32960.1	Subtilisin-like protease SBT3.3	SBT3.3
	AT1G09640.1	Probable elongation factor 1-gamma 1	At1g09640
	AT5G15650.1	UDP-arabinopyranose mutase 2	RGP2
	AT1G26380.1	Berberine bridge enzyme-like 3	FOX1
	AT3G03780.1	5-methyltetrahydropteroyltriglutamate--homocysteine methyltransferase 2	MS2
	AT5G55480.1	Glycerophosphodiester phosphodiesterase GDPDL4	GDPDL4
	AT3G52990.1	Pyruvate kinase	At3g52990
	AT2G36580.1	Pyruvate kinase
	AT1G23800.1	Aldehyde dehydrogenase family 2 member B7, mitochondrial	ALDH2B7
	AT5G17330.1	Glutamate decarboxylase 1	GAD1
	AT1G13440.1	Glyceraldehyde-3-phosphate dehydrogenase GAPC2, cytosolic	GAPC2
	AT5G63680.1	Pyruvate kinase	MBK5.16
	AT4G13940.1	Adenosylhomocysteinase 1	SAHH1
	AT5G53850.2	Probable bifunctional methylthioribulose-1-phosphate dehydratase/enolase-phosphatase E1	At5g53850
	AT5G64570.1	Beta-D-xylosidase 4	BXL4
	AT2G42910.1	Ribose-phosphate pyrophosphokinase 4	PRS4
	AT2G01140.1	Fructose-bisphosphate aldolase 3, chloroplastic	FBA3
	AT3G55410.1	Oxoglutarate dehydrogenase (succinyl-transferring)
	AT1G50480.1	Formate--tetrahydrofolate ligase	THFS
	AT5G34940.2	Heparanase-like protein 3	GUS3 like
	AT4G37870.1	Phosphoenolpyruvate carboxykinase (ATP) 1	PCK1
	AT4G27520.1	Early nodulin-like protein 2
	AT1G65930.1	Cytosolic isocitrate dehydrogenase [NADP]	CICDH
	AT2G38380.1	Peroxidase 22	PER22
	AT3G02360.1	6-phosphogluconate dehydrogenase, decarboxylating 2	PGD2
	AT1G53310.1	Phosphoenolpyruvate carboxylase 1	PPC1
	AT3G03250.1	UTP--glucose-1-phosphate uridylyltransferase 2	UGP2
	AT3G54400.1	Peptidase A1 domain-containing protein	AXX17_At3g48830
	AT2G37770.2	NADPH-dependent aldo-keto reductase, chloroplastic	AKR4C9
	AT2G47510.1	Fumarate hydratase 1, mitochondrial	FUM1
	AT5G08570.1	Pyruvate kinase	MAH20.13
	AT1G79750.1	NADP-dependent malic enzyme 4, chloroplastic	NADP-ME4
	AT5G54080.1	Homogentisate 1,2-dioxygenase	HGO
	AT5G19510.1	Elongation factor 1-beta 2
	AT2G41220.1	Ferredoxin-dependent glutamate synthase 2, chloroplastic	GLU2
	AT5G09810.1	Actin-7	ACT7
	AT4G20850.1	Tripeptidyl-peptidase 2	TPP2
	AT4G34890.1	Xanthine dehydrogenase 1	XDH1
	AT4G35830.1	Aconitate hydratase 1	ACO1
	AT5G28540.1	Heat shock 70 kDa protein BIP1	BIP1
	AT1G07920.1	Elongation factor 1-alpha 3	A3
	AT5G27850.1	60S ribosomal protein L18-3	RPL18C
	AT2G31390.1	Probable fructokinase-1
	AT5G08670.1	ATP synthase subunit beta
	AT1G30230.1	Elongation factor 1-delta 1
	AT3G07390.1	Auxin-induced in root cultures protein 12	AIR12
	AT4G18360.1	Peroxisomal (S)-2-hydroxy-acid oxidase GLO5	GLO5
	AT5G18470.1	Bulb-type lectin domain-containing protein
	AT5G52920.1	Plastidial pyruvate kinase 2	PKP2
	AT3G22960.1	Plastidial pyruvate kinase 1, chloroplastic	PKP1
	AT4G11010.1	Nucleoside diphosphate kinase III, chloroplastic/mitochondrial	NDPK3
	AT5G16990.1	NADP-dependent alkenal double bond reductase P2	P2
	AT1G78850.1	EP1-like glycoprotein 3
	AT5G53460.1	Glutamate synthase 1 [NADH], chloroplastic	GLT1
	AT3G32980.1	Peroxidase 32	PER32
	AT5G16510.1	Probable UDP-arabinopyranose mutase 5	RGP5
	AT5G16970.1	NADPH-dependent oxidoreductase 2-alkenal reductase	AER
	AT1G04410.1	Malate dehydrogenase 1, cytoplasmic	MDH1
	AT3G61440.1	Bifunctional L-3-cyanoalanine synthase/cysteine synthase C1, mitochondrial	CYSC1
	AT5G21105.1	L-ascorbate oxidase
	AT4G16760.1	Peroxisomal acyl-coenzyme A oxidase 1	ACX1
	AT5G64370.1	Beta-ureidopropionase	PYD3
	AT2G16060.1	Non-symbiotic hemoglobin 1	AHB1
	AT2G07698.1	ATP synthase subunit alpha, mitochondrial	At2g07698
	AT3G12500.1	Basic endochitinase B	CHI-B
	AT5G15490.1	UDP-glucose 6-dehydrogenase 3	UGD3
	AT3G13560.1	Glucan endo-1,3-beta-glucosidase 4	At3g13560
	AT2G18020.1	60S ribosomal protein L8-1	RPL8A
	AT3G16530.1	Lectin-like protein At3g16530
	AT1G72370.1	40S ribosomal protein Sa-1	RPSaA
	AT4G33070.1	Pyruvate decarboxylase 1	PDC1
	AT2G40010.1	60S acidic ribosomal protein P0-1	RPP0A
	AT3G24503.1	Aldehyde dehydrogenase family 2 member C4	ALDH2C4
	AT5G39120.1	Germin-like protein subfamily 1 member 15	At5g39120
	AT5G49460.1	ATP-citrate synthase beta chain protein 2	ACLB-2
	AT2G42600.1	Phosphoenolpyruvate carboxylase 2	PPC2
	AT1G32940.1	Subtilisin-like protease SBT3.5	SBT3.5
	AT1G35160.1	14-3-3-like protein GF14 phi	GRF4
	AT2G37190.1	60S ribosomal protein L12-1	RPL12A
	AT5G19550.1	Aspartate aminotransferase, cytoplasmic isozyme 1	ASP2
	AT4G38220.1	N-acyl-L-amino-acid amidohydrolase	AQI
	AT4G34180.1	Cyclase-like protein 1	CYCLASE1
	AT1G21880.1	LysM domain-containing GPI-anchored protein 1	LYM1
	AT5G56000.1	Heat shock protein 90-4	HSP90-4
	AT2G01250.1	60S ribosomal protein L7-2	RPL7B
	AT1G77120.1	Alcohol dehydrogenase class-P	ADH1
	AT1G53240.1	Malate dehydrogenase 1, mitochondrial	At1g53240
	AT3G13930.1	Dihydrolipoyllysine-residue acetyltransferase component 2 of pyruvate dehydrogenase complex, mitochondrial
	AT4G31140.1	Glucan endo-1,3-beta-glucosidase 5
	AT1G09750.1	Aspartyl protease AED3	AED3
	AT4G24830.1	Argininosuccinate synthase, chloroplastic
	AT4G34200.1	D-3-phosphoglycerate dehydrogenase 1, chloroplastic	PGDH1
	AT5G54960.1	Pyruvate decarboxylase 2	PDC2
	AT1G23410.1	Ubiquitin-40S ribosomal protein S27a-1	RPS27AA
	AT1G22300.1	14-3-3-like protein GF14 epsilon	GRF10
	AT1G79550.1	Phosphoglycerate kinase 3, cytosolic	PGK3
	AT5G10450.1	14-3-3-like protein GF14 lambda	GRF6
	AT1G74050.1	60S ribosomal protein L6-3	RPL6C
	AT5G20010.1	GTP-binding nuclear protein Ran-1	RAN1
	AT2G25060.1	Early nodulin-like protein 1
	AT3G14990.1	Protein DJ-1 homolog A	DJ1A
	AT2G47610.1	60S ribosomal protein L7a-1	RPL7AA
	AT5G08370.1	Alpha-galactosidase 2	AGAL2
	AT2G05710.1	Aconitate hydratase 3, mitochondrial	ACO3
	AT1G53280.1	Protein DJ-1 homolog B	DJ1B
	AT4G26690.1	Glycerophosphodiester phosphodiesterase GDPDL3	GDPDL3
	AT4G34870.1	Peptidyl-prolyl cis-trans isomerase CYP18-4	CYP18-4
	AT1G72150.1	Patellin-1	PATL1
	AT5G43940.1	Alcohol dehydrogenase class-3	ADH2
	AT2G39460.1	60S ribosomal protein L23a-1	RPL23AA
	AT3G49120.1	Peroxidase 34	PER34
	AT1G56070.1	Elongation factor 2	LOS1
	AT4G16660.1	Heat shock 70 kDa protein 17	HSP70-17
	AT2G27710.1	60S acidic ribosomal protein P2-2	RPP2B
	AT3G25520.1	60S ribosomal protein L5-1	RPL5A
	AT3G20370.1	AT3g20370/MQC12_13
	AT3G15356.1	Lectin-like protein LEC	LEC
	AT5G07830.1	Heparanase-like protein 1	GUS1 like
	AT5G13120.1	Photosynthetic NDH subunit of lumenal location 5, chloroplastic	PNSL5
	AT4G34260.1	Alpha-L-fucosidase 2	FUC95A
	AT5G56350.1	Pyruvate kinase	MCD7.8
	AT5G66120.1	3-dehydroquinate synthase, chloroplastic	DHQS
	AT3G49010.1	60S ribosomal protein L13-1	RPL13B
	AT3G05180.1	GDSL esterase/lipase At3g05180	At3g05180
	AT3G49910.1	60S ribosomal protein L26-1	RPL26A
	AT3G10740.1	Alpha-L-arabinofuranosidase 1	ASD1
	AT5G25090.1	Early nodulin-like protein 3	At5g25090
	AT3G09820.1	Adenosine kinase 1	ADK1
	AT1G79440.1	Succinate-semialdehyde dehydrogenase, mitochondrial	ALDH5F1
	AT5G15200.1	40S ribosomal protein S9-1	RPS9B
	AT3G10920.1	Superoxide dismutase [Mn] 1, mitochondrial	MSD1
	AT3G51800.1	ERBB-3 BINDING PROTEIN 1	EBP1
	AT3G27300.1	Glucose-6-phosphate 1-dehydrogenase 5, cytoplasmic	G6PD5
	AT5G07030.1	Eukaryotic aspartyl protease family protein	MOJ9.20
	AT3G03960.1	T-complex protein 1 subunit theta	CCT8
	AT3G55260.1	Beta-hexosaminidase 1	HEXO1
	AT1G66200.1	Glutamine synthetase cytosolic isozyme 1-2	GLN1-2
	AT1G12775.1	Pentatricopeptide repeat-containing protein At1g12775, mitochondrial	At1g12775
	AT3G04720.1	Hevein-like preproprotein	HEL
	AT2G21130.1	Peptidyl-prolyl cis-trans isomerase CYP19-2	CYP19-2
	AT5G10920.1	Argininosuccinate lyase, chloroplastic	At5g10920
	AT4G15940.1	Probable acylpyruvase FAHD1, mitochondrial	FAHD1
	AT4G16720.1	60S ribosomal protein L15-1	RPL15A
	AT1G76160.1	sks5	sks5
	AT1G07770.1	40S ribosomal protein S15a-1	RPS15AA
	AT4G36195.1	Prolyl carboxypeptidase like protein
	AT1G65900.1	At1g65900/F12P19_7
	AT1G54270.1	Eukaryotic initiation factor 4A-2	TIF4A-2
	AT1G20225.1	Thioredoxin superfamily protein	T20H2.2
	AT2G21330.1	Fructose-bisphosphate aldolase 1, chloroplastic	FBA1
	AT2G05990.1	Enoyl-[acyl-carrier-protein] reductase [NADH], chloroplastic	MOD1
	AT5G59880.1	Actin-depolymerizing factor 3	ADF3
	AT4G23170.1	Putative cysteine-rich receptor-like protein kinase 9	CRK9
	AT2G43560.1	Peptidyl-prolyl cis-trans isomerase FKBP16-3, chloroplastic	FKBP16-3
	AT4G11650.1	Osmotin-like protein OSM34	OSM34
	AT1G29880.1	Glycine--tRNA ligase, mitochondrial 1
	AT1G07660.1	Histone H4
	AT2G27450.1	N-carbamoylputrescine amidase	CPA
	AT5G20830.1	Sucrose synthase 1	SUS1
	ATCG00120.1	ATP synthase subunit alpha, chloroplastic	atpA
	AT1G44180.1	Aminoacylase, putative	T18F15.13
	AT3G45030.1	40S ribosomal protein S20-1	RPS20A
	AT4G27450.1	F27G19_50
	AT2G17630.1	Phosphoserine aminotransferase 2, chloroplastic	PSAT2
	AT5G63810.1	Beta-galactosidase 10	BGAL10
	AT4G26870.1	Aspartate--tRNA ligase 1, cytoplasmic	At4g26870
	AT3G52880.1	Monodehydroascorbate reductase 1, peroxisomal	MDAR1
	ATCG00490.1	Ribulose bisphosphate carboxylase large chain	rbcL
	AT3G22110.1	Proteasome subunit alpha type-4-A	PAC1
	AT2G27020.1	Proteasome subunit alpha type-3	PAG1
	AT4G30150.1	Urb2/Npa2 family protein	At4g30150
	AT3G53740.1	60S ribosomal protein L36-2	RPL36B
	AT4G20830.1	Berberine bridge enzyme-like 19
	AT5G07350.1	Ribonuclease TUDOR 1	TSN1
	AT1G11580.1	Pectinesterase/pectinesterase inhibitor 18	PME18
	AT1G52400.1	Beta-D-glucopyranosyl abscisate beta-glucosidase	BGLU18
	AT1G02920.1	Glutathione S-transferase F7	GSTF7
	AT1G04690.1	Probable voltage-gated potassium channel subunit beta	KAB1
	AT2G30860.1	Glutathione S-transferase F9	GSTF9
	AT1G04580.1	Aldehyde oxidase 4	AAO4
	AT2G22780.1	Malate dehydrogenase 1, peroxisomal	PMDH1
	AT4G01870.1	TolB protein-like protein
	AT4G31840.1	Early nodulin-like protein 15	ENODL15
	AT1G53070.1	Lectin-like protein At1g53070
	AT3G06930.1	Probable histone-arginine methyltransferase 1.3	PRMT13
	AT3G26380.1	Alpha-galactosidase
	AT5G09900.1	26S proteasome non-ATPase regulatory subunit 12 homolog A	RPN5A
	AT2G18150.1	Peroxidase 15	PER15
	AT5G41250.1	Probable xyloglucan galactosyltransferase GT20	GT20
	AT1G23190.1	Probable phosphoglucomutase, cytoplasmic 1
	AT3G20250.1	Pumilio homolog 5	APUM5
	AT2G33040.1	ATP synthase subunit gamma, mitochondrial	ATPC
	AT5G58390.1	Peroxidase 67	PER67
	AT3G16420.1	PYK10-binding protein 1	PBP1
	AT5G42980.1	Thioredoxin H3	TRX3
	AT3G07750.1	3'-5'-exoribonuclease family protein	MLP3.20
	AT3G53180.1	Nodulin/glutamine synthase-like protein	NodGS
	AT3G09840.1	Cell division control protein 48 homolog A	CDC48A
	AT4G26270.1	ATP-dependent 6-phosphofructokinase 3	PFK3
	AT4G31990.1	Aspartate aminotransferase, chloroplastic	ASP5
	AT1G53510.1	Mitogen-activated protein kinase 18	MPK18
	AT5G25780.1	Eukaryotic translation initiation factor 3 subunit B	EIF3B-2
	AT2G27150.1	Abscisic-aldehyde oxidase	AAO3
	AT4G27490.1	Exosome complex component RRP41-like	RRP41L
	AT4G10320.1	Isoleucine--tRNA ligase, cytoplasmic	At4g10320
	AT3G27530.1	Golgin candidate 6	GC6
	AT1G36280.1	Adenylosuccinate lyase
	AT4G32520.1	Serine hydroxymethyltransferase 3, chloroplastic	SHM3
	AT1G09780.1	2,3-bisphosphoglycerate-independent phosphoglycerate mutase 1	PGM1
	AT2G45470.1	Fasciclin-like arabinogalactan protein 8
	AT4G04320.1	Malonyl-CoA decarboxylase family protein
	AT5G50850.1	Pyruvate dehydrogenase E1 component subunit beta-1, mitochondrial	PDH2
	AT3G60770.1	40S ribosomal protein S13-1	RPS13A
	AT3G04840.1	40S ribosomal protein S3a-1	RPS3AA
	AT3G06860.1	Peroxisomal fatty acid beta-oxidation multifunctional protein MFP2	MFP2
	AT2G42740.1	60S ribosomal protein L11-1	RPL11A
	AT2G18230.1	Soluble inorganic pyrophosphatase 2	PPA2
	AT2G26080.1	Glycine dehydrogenase (decarboxylating) 2, mitochondrial	GLDP2
	AT3G02080.1	40S ribosomal protein S19-1	RPS19A
	AT1G72160.1	Patellin-3	PATL3
	AT2G37270.1	40S ribosomal protein S5-1	RPS5A
	AT3G51260.1	Proteasome subunit alpha type-7-A	PAD1
	AT1G47250.1	Proteasome subunit alpha type-1-B	PAF2
	AT4G08900.1	Arginase 1, mitochondrial	ARGAH1
	AT4G03080.1	Serine/threonine-protein phosphatase BSL1	BSL1
	AT4G17260.1	L-lactate dehydrogenase	dl4665w
	AT1G05260.1	Peroxidase 3	PER3
	AT2G20450.1	60S ribosomal protein L14-1	RPL14A
	AT4G20260.1	Plasma membrane-associated cation-binding protein 1	PCAP1
	AT3G20050.1	T-complex protein 1 subunit alpha	CCT1
	AT1G07890.1	L-ascorbate peroxidase 1, cytosolic	APX1
	AT1G78380.1	Glutathione S-transferase U19	GSTU19
	AT5G51930.1	Glucose-methanol-choline (GMC) oxidoreductase family protein	MSG15.1

## Sheet: Tab S. 2
Table S2. List of all genes encoding proteins identified in Table S1 using Maldi-TOF analysis of 150 kD protein fraction after removing those present in two or more genotypes (563 proteins).
1	AT4G02520.1	Glutathione S-transferase F2	GSTF2
2	AT2G02930.1	Glutathione S-transferase F3	GSTF3
3	AT1G35720.1	Annexin D1	ANN1
4	AT3G14990.1	Protein DJ-1 homolog A	DJ1A
5	AT1G02920.1	Glutathione S-transferase F7	GSTF7
6	AT4G09000.1	14-3-3-like protein GF14 chi	GRF1
7	At5g03630	Monodehydroascorbate reductase 2	MDAR2
8	AT5G13420.1	Transaldolase	TRA2
9	At5g16050	14-3-3-like protein GF14 upsilon	GRF5
10	AT1G22300.1	14-3-3-like protein GF14 epsilon	GRF10
11	AT1G35160.1	14-3-3-like protein GF14 phi	GRF4
12	AT2G30870.1	Glutathione S-transferase F10	GSTF10
13	AT3G02520.1	14-3-3-like protein GF14 nu	GRF7
14	AT1G78300.1	14-3-3-like protein GF14 omega	GRF2
15	AT2G47730.1	Glutathione S-transferase F8, chloroplastic	GSTF8
16	AT1G75280.1	Isoflavone reductase homolog P3
17	AT5G38480.1	14-3-3-like protein GF14 psi	GRF3
18	At1g11840	Lactoylglutathione lyase GLX1	GLX1
19	AT1G75040.1	Pathogenesis-related protein 5	PR-5
20	AT2G30860.1	Glutathione S-transferase F9	GSTF9
21	AT2G42590.1	14-3-3-like protein GF14 mu	GRF9
22	AT3G55440.1	Triosephosphate isomerase, cytosolic	CTIMC
23	AT5G10450.1	14-3-3-like protein GF14 lambda	GRF6
24	AT4G08390.1	L-ascorbate peroxidase S, chloroplastic/mitochondrial	APXS
25	AT5G65430.1	14-3-3-like protein GF14 kappa	GRF8
26	AT1G60730.1	Probable aldo-keto reductase 5
27	AT1G27450.1	Adenine phosphoribosyltransferase 1, chloroplastic	APT1
28	AT2G36530.1	Bifunctional enolase 2/transcriptional activator	ENO2
29	AT3G16400.1	Nitrile-specifier protein 1	NSP1
30	AT4G34050.1	Caffeoyl-CoA O-methyltransferase 1	CCOAOMT1
31	AT1G78380.1	Glutathione S-transferase U19	GSTU19
32	AT3G62030.1	Peptidyl-prolyl cis-trans isomerase CYP20-3, chloroplastic	CYP20-3
33	AT4G14030.1	Selenium-binding protein 1	SBP1
34	AT5G57330.1	Glucose-6-phosphate 1-epimerase	MJB24.14
35	AT1G19130.1	RmlC-like jelly roll fold protein
36	AT4G27450.1	F27G19_50
37	AT2G31390.1	Probable fructokinase-1
38	AT1G07890.1	L-ascorbate peroxidase 1, cytosolic	APX1
39	AT1G60690.1	Probable aldo-keto reductase 3
40	AT2G21620.1	Adenine nucleotide alpha hydrolases-like superfamily protein	RD2
41	AT4G03520.1	Thioredoxin M2, chloroplastic	TRXM2
42	AT1G23820.1	Spermidine synthase 1	SPDSYN1
43	AT3G20390.1	Reactive Intermediate Deaminase A, chloroplastic	RIDA
44	AT1G77120.1	Alcohol dehydrogenase class-P	ADH1
45	AT3G44300.1	Nitrilase 2	NIT2
46	AT3G52930.1	Fructose-bisphosphate aldolase 8, cytosolic	FBA8
47	AT4G23100.1	Glutamate--cysteine ligase, chloroplastic	GSH1
48	AT3G44320.1	Nitrilase 3	NIT3
49	AT2G04400.1	Indole-3-glycerol phosphate synthase, chloroplastic	IGPS
50	AT1G62380.1	1-aminocyclopropane-1-carboxylate oxidase 2	ACO2
51	AT4G20260.1	Plasma membrane-associated cation-binding protein 1	PCAP1
52	AT2G33590.1	NAD(P)-binding Rossmann-fold superfamily protein	CRL1
53	AT1G12230.1	Transaldolase
54	AT1G08980.1	Amidase 1	AMI1
55	AT1G56190.1	Phosphoglycerate kinase 2, chloroplastic
56	AT4G08870.1	Arginase 2, chloroplastic/mitochondrial	ARGAH2
57	AT1G70310.1	Spermidine synthase 2	SPDSYN2
58	AT5G58070.1	Temperature-induced lipocalin-1	TIL
59	AT4G13360.1	3-hydroxyisobutyryl-CoA hydrolase-like protein 3, mitochondrial
60	AT2G41380.1	S-adenosyl-L-methionine-dependent methyltransferases superfamily protein
61	AT4G27270.1	Probable NAD(P)H dehydrogenase (quinone) FQR1-like 1
62	AT1G74230.1	Glycine-rich RNA-binding protein 5, mitochondrial	RBG5
63	AT3G61440.1	Bifunctional L-3-cyanoalanine synthase/cysteine synthase C1, mitochondrial	CYSC1
64	AT2G21170.1	Triosephosphate isomerase, chloroplastic	TIM
65	AT2G37660.1	Uncharacterized protein At2g37660, chloroplastic
66	AT2G23610.1	Methylesterase 3	MES3
67	AT2G41530.1	S-formylglutathione hydrolase	SFGH
68	AT3G54420.1	Endochitinase EP3	EP3
69	AT4G39260.1	Glycine-rich RNA-binding protein 8	RBG8
70	AT3G09940.1	Monodehydroascorbate reductase 3	MDAR3
71	AT1G51680.1	4-coumarate--CoA ligase 1	4CL1
72	AT2G39460.1	60S ribosomal protein L23a-1	RPL23AA
73	AT1G17290.1	Alanine aminotransferase 1, mitochondrial	ALAAT1
74	AT3G16420.1	PYK10-binding protein 1	PBP1
75	AT5G60360.1	Thiol protease aleurain	ALEU
76	AT1G79230.1	Thiosulfate/3-mercaptopyruvate sulfurtransferase 1, mitochondrial	STR1
77	AT4G15210.1	Beta-amylase 5	BAM5
78	AT3G12490.1	Cysteine proteinase inhibitor	CYSB
79	AT1G74030.1	Enolase 1, chloroplastic	ENO1
80	AT2G20630.1	Probable protein phosphatase 2C 20	PPC3-1.2
81	AT1G08200.1	UDP-D-apiose/UDP-D-xylose synthase 2	AXS2
82	AT4G17530.1	Ras-related protein RABD2c	RABD2C
83	AT2G14260.1	Proline iminopeptidase	PIP
84	AT5G36160.1	Tyrosine aminotransferase	TAT
85	AT3G47000.1	Beta-glucosidase	F13I12.50
86	AT5G20230.1	Blue copper protein	BCB
87	AT1G77510.1	Protein disulfide isomerase-like 1-2	PDIL1-2
88	AT5G42980.1	Thioredoxin H3	TRX3
89	AT5G01600.1	Ferritin-1, chloroplastic	FER1
90	AT5G19440.1	Epimerase domain-containing protein	AXX17_At5g19330
91	AT3G17940.1	Aldose 1-epimerase
92	AT1G09210.1	Calreticulin-2	CRT2
93	AT1G74090.1	Cytosolic sulfotransferase 18	SOT18
94	AT5G40370.1	Glutaredoxin-C2	GRXC2
95	AT1G14210.1	Ribonuclease T(2)
96	AT3G12390.1	Nascent polypeptide-associated complex subunit alpha-like protein 1
97	AT1G07140.1	Ran-binding protein 1 homolog a	RANBP1A
98	AT5G07440.1	Glutamate dehydrogenase 2	GDH2
99	AT2G36460.1	Fructose-bisphosphate aldolase 6, cytosolic	FBA6
100	AT2G37040.1	Phenylalanine ammonia-lyase 1	PAL1
101	AT3G52930.1	Fructose-bisphosphate aldolase 8, cytosolic	FBA8
102	AT5G18170.1	Glutamate dehydrogenase 1	GDH1
103	AT3G53260.1	Phenylalanine ammonia-lyase 2	PAL2
104	AT1G54100.1	Aldehyde dehydrogenase family 7 member B4	ALDH7B4
105	AT5G11670.1	NADP-dependent malic enzyme 2	NADP-ME2
106	AT2G14170.1	Methylmalonate-semialdehyde dehydrogenase [acylating], mitochondrial	ALDH6B2
107	AT5G67360.1	Subtilisin-like protease SBT1.7	SBT1.7
108	AT2G24200.1	Leucine aminopeptidase 1	LAP1
109	AT3G02230.1	UDP-arabinopyranose mutase 1	RGP1
110	AT5G54080.1	Homogentisate 1,2-dioxygenase	HGO
111	AT4G02520.1	Glutathione S-transferase F2	GSTF2
112	AT5G15650.1	UDP-arabinopyranose mutase 2	RGP2
113	AT5G55480.1	Glycerophosphodiester phosphodiesterase GDPDL4	GDPDL4
114	AT3G03910.1	Probable glutamate dehydrogenase 3	GSH3
115	AT2G31390.1	Probable fructokinase-1
116	AT5G13980.1	Probable alpha-mannosidase
117	AT5G17920.1	5-methyltetrahydropteroyltriglutamate--homocysteine methyltransferase 1	MS1
118	AT5G20960.1	Indole-3-acetaldehyde oxidase	AAO1
119	AT3G03780.1	5-methyltetrahydropteroyltriglutamate--homocysteine methyltransferase 2	MS2
120	AT1G65960.2	Glutamate decarboxylase 2	GAD2
121	AT3G48000.1	Aldehyde dehydrogenase family 2 member B4, mitochondrial	ALDH2B4
122	AT5G34940.2	Heparanase-like protein 3	GUS3
123	AT5G12950.1	Proline-tRNA ligase (DUF1680)
124	AT1G09750.1	Aspartyl protease AED3	AED3
125	AT1G65930.1	Cytosolic isocitrate dehydrogenase [NADP]	CICDH
126	AT4G16260.1	Probable glucan endo-1,3-beta-glucosidase
127	AT5G02500.1	Heat shock 70 kDa protein 1	HSP70-1
128	AT5G65750.1	Oxoglutarate dehydrogenase (succinyl-transferring)	MPA24.10
129	AT5G64570.1	Beta-D-xylosidase 4	BXL4
130	AT1G13440.1	Glyceraldehyde-3-phosphate dehydrogenase GAPC2, cytosolic	GAPC2
131	AT5G21105.1	L-ascorbate oxidase
132	AT3G54400.1	T12E18_90
133	AT4G37870.1	Phosphoenolpyruvate carboxykinase (ATP) 1	PCK1
134	AT1G04580.1	Aldehyde oxidase 4	AAO4
135	AT5G64370.1	Beta-ureidopropionase	PYD3
136	AT1G76160.1	sks5	sks5
137	AT5G17330.1	Glutamate decarboxylase 1	GAD1
138	AT4G18360.1	Peroxisomal (S)-2-hydroxy-acid oxidase GLO5	GLO5
139	AT3G07390.1	Auxin-induced in root cultures protein 12	AIR12
140	AT3G51260.1	Proteasome subunit alpha type-7-A	PAD1
141	AT5G18470.1	Bulb-type lectin domain-containing protein
142	AT4G31140.1	Glucan endo-1,3-beta-glucosidase 5
143	AT1G35720.1	Annexin D1	ANN1
144	AT4G16760.1	Peroxisomal acyl-coenzyme A oxidase 1	ACX1
145	AT5G08670.1	ATP synthase subunit beta
146	AT1G26380.1	Berberine bridge enzyme-like 3	FOX1
147	AT4G27520.1	Early nodulin-like protein 2
148	AT2G01140.1	Fructose-bisphosphate aldolase 3, chloroplastic	FBA3
149	AT2G38380.1	Peroxidase 22	PER22
150	AT3G09260.1	Beta-glucosidase 23	BGLU23
151	AT1G79750.1	NADP-dependent malic enzyme 4, chloroplastic	NADP-ME4
152	AT1G21880.1	LysM domain-containing GPI-anchored protein 1	LYM1
153	AT1G04410.1	Malate dehydrogenase 1, cytoplasmic	MDH1
154	AT3G20370.1	AT3g20370/MQC12_13
155	AT4G33070.1	Pyruvate decarboxylase 1	PDC1
156	AT5G54960.1	Pyruvate decarboxylase 2	PDC2
157	AT4G34200.1	D-3-phosphoglycerate dehydrogenase 1, chloroplastic	PGDH1
158	AT5G08370.1	Alpha-galactosidase 2	AGAL2
159	AT1G20225.1	Thioredoxin superfamily protein	T20H2.2
160	AT5G10560.1	Probable beta-D-xylosidase 6	BXL6
161	AT2G25060.1	Early nodulin-like protein 1
162	AT3G26720.1	Alpha-mannosidase
163	AT1G23410.1	Ubiquitin-40S ribosomal protein S27a-1	RPS27AA
164	AT3G14920.1	Peptide-N4-(N-acetyl-beta-glucosaminyl)asparagine amidase A protein
165	AT1G11580.1	Pectinesterase/pectinesterase inhibitor 18	PME18
166	AT1G23800.1	Aldehyde dehydrogenase family 2 member B7, mitochondrial	ALDH2B7
167	AT4G13940.1	Adenosylhomocysteinase 1	SAHH1
168	AT3G04720.1	Hevein-like preproprotein	HEL
169	AT4G38220.1	N-acyl-L-amino-acid amidohydrolase	AQI
170	AT3G12500.1	Basic endochitinase B	CHI-B
171	AT1G72370.1	40S ribosomal protein Sa-1	RPSaA
172	AT2G27020.1	Proteasome subunit alpha type-3	PAG1
173	AT1G74050.1	60S ribosomal protein L6-3	RPL6C
174	AT5G16510.1	Probable UDP-arabinopyranose mutase 5	RGP5
175	AT4G11010.1	Nucleoside diphosphate kinase III, chloroplastic/mitochondrial	NDPK3
176	AT1G53850.1	Proteasome subunit alpha type-5-A	PAE1
177	AT5G13120.1	Photosynthetic NDH subunit of lumenal location 5, chloroplastic	PNSL5
178	AT5G25980.1	Myrosinase 2	TGG2
179	AT5G07030.1	Eukaryotic aspartyl protease family protein	MOJ9.20
180	AT2G37190.1	60S ribosomal protein L12-1	RPL12A
181	AT1G18540.1	60S ribosomal protein L6-1	RPL6A
182	AT1G47250.1	Proteasome subunit alpha type-1-B	PAF2
183	AT1G61820.1	Beta-glucosidase 46	BGLU46
184	AT3G32980.1	Peroxidase 32	PER32
185	AT2G05710.1	Aconitate hydratase 3, mitochondrial	ACO3
186	AT2G43560.1	Peptidyl-prolyl cis-trans isomerase FKBP16-3, chloroplastic	FKBP16-3
187	AT4G31840.1	Early nodulin-like protein 15	ENODL15
188	AT5G61410.1	Ribulose-5-phosphate-3-epimerase, chloroplastic	RPE
189	AT1G16470.1	Proteasome subunit alpha type-2-A	PAB1
190	AT5G25090.1	Early nodulin-like protein 3	At5g25090
191	AT2G40010.1	60S acidic ribosomal protein P0-1	RPP0A
192	AT1G44180.1	Aminoacylase, putative	T18F15.13
193	AT3G26380.1	Alpha-galactosidase
194	AT1G03220.1	Eukaryotic aspartyl protease family protein
195	AT3G43600.1	Indole-3-acetaldehyde oxidase	AAO2
196	AT2G37770.1	NADPH-dependent aldo-keto reductase, chloroplastic	AKR4C9
197	AT3G02360.1	6-phosphogluconate dehydrogenase, decarboxylating 2	PGD2
198	AT1G57720.1	Probable elongation factor 1-gamma 2	At1g57720
199	AT3G13560.1	Glucan endo-1,3-beta-glucosidase 4
200	AT1G66200.1	Glutamine synthetase cytosolic isozyme 1-2	GLN1-2
201	AT1G64230.1	Ubiquitin-conjugating enzyme E2 28	UBC28
202	AT1G22530.1	Patellin-2	PATL2
203	AT3G20250.1	Pumilio homolog 5	APUM5
204	AT3G03250.1	UTP--glucose-1-phosphate uridylyltransferase 2	UGP2
205	AT4G34890.1	Xanthine dehydrogenase 1	XDH1
206	AT1G66970.1	Glycerophosphodiester phosphodiesterase GDPDL1	GDPDL1
207	AT2G22780.1	Malate dehydrogenase 1, peroxisomal	PMDH1
208	AT2G05840.1	Proteasome subunit alpha type-6-B	PAA2
209	AT3G22120.1	At3g22120	CWLP
210	AT1G56070.1	Elongation factor 2	LOS1
211	AT1G22300.1	14-3-3-like protein GF14 epsilon	GRF10
212	AT1G53240.1	Malate dehydrogenase 1, mitochondrial	At1g53240
213	AT4G09320.1	Nucleoside diphosphate kinase 1	NDK1
214	AT5G62530.1	Delta-1-pyrroline-5-carboxylate dehydrogenase 12A1, mitochondrial	ALDH12A1
215	AT1G52570.1	Phospholipase D alpha 2	PLDALPHA2
216	AT4G11650.1	Osmotin-like protein OSM34	OSM34
217	AT4G15940.1	Probable acylpyruvase FAHD1, mitochondrial	FAHD1
218	AT5G17380.1	2-hydroxyacyl-CoA lyase	HACL
219	AT4G30150.1	Urb2/Npa2 family protein	At4g30150
220	AT3G51800.1	ERBB-3 BINDING PROTEIN 1	EBP1
221	AT4G23160.1	Cysteine-rich receptor-like protein kinase 8	CRK8
222	AT1G79440.1	Succinate-semialdehyde dehydrogenase, mitochondrial	ALDH5F1
223	AT3G61490.1	Pectin lyase-like superfamily protein	F2A19.90
224	AT1G54220.1	Dihydrolipoyllysine-residue acetyltransferase component 3 of pyruvate dehydrogenase complex, mitochondrial	At1g54220
225	AT2G36580.1	Pyruvate kinase
226	AT4G31300.1	Proteasome subunit beta type-6	PBA1
227	AT1G78850.1	EP1-like glycoprotein 3	At1g78850
228	AT1G79550.1	Phosphoglycerate kinase 3, cytosolic	PGK3
229	AT3G23990.1	Chaperonin CPN60, mitochondrial	CPN60
230	AT1G78900.1	V-type proton ATPase catalytic subunit A	VHA-A
231	AT5G42790.1	Proteasome subunit alpha type-1-A	PAF1
232	AT2G33210.1	Chaperonin CPN60-like 1, mitochondrial
233	AT5G35590.1	Proteasome subunit alpha type-6-A	PAA1
234	AT5G15650.1	UDP-arabinopyranose mutase 2	RGP2
235	AT1G53850.1	Proteasome subunit alpha type-5-A	PAE1
236	AT5G66140.1	Proteasome subunit alpha type-7-B	PAD2
237	AT3G14290.1	Proteasome subunit alpha type-5-B	PAE2
238	AT3G60820.1	Proteasome subunit beta type-1	PBF1
239	AT1G13060.1	Proteasome subunit beta type-5-A	PBE1
240	AT1G56450.1	Proteasome subunit beta type-4	PBG1
241	AT3G22110.1	Proteasome subunit alpha type-4-A	PAC1
242	AT1G78850.1	EP1-like glycoprotein 3
243	AT5G56500.1	Chaperonin 60 subunit beta 3, chloroplastic	CPN60B3
244	AT1G20260.1	V-type proton ATPase subunit B3	VHA-B3
245	AT2G28000.1	Chaperonin 60 subunit alpha 1, chloroplastic	CPN60A1
246	AT4G20830.1	Berberine bridge enzyme-like 19
247	AT4G38510.1	V-type proton ATPase subunit B2	VHA-B2
248	AT1G78860.1	EP1-like glycoprotein 4
249	AT3G26340.1	Proteasome subunit beta type-5-B	PBE2
250	AT1G55490.1	Chaperonin 60 subunit beta 1, chloroplastic	CPN60B1
251	AT3G13860.1	Chaperonin CPN60-like 2, mitochondrial
252	AT4G14800.1	Proteasome subunit beta type-2-B	PBD2
253	ATCG00490.1	Ribulose bisphosphate carboxylase large chain	rbcL
254	AT1G33120.1	60S ribosomal protein L9-1	RPL9B
255	AT1G33590.1	Leucine-rich repeat (LRR) family protein
256	AT3G22630.1	Proteasome subunit beta type-2-A	PBD1
257	AT3G09440.1	Heat shock 70 kDa protein 3	HSP70-3
258	AT3G09630.1	60S ribosomal protein L4-1	RPL4A
259	AT1G21720.1	Proteasome subunit beta type-3-A	PBC1
260	AT4G11150.1	V-type proton ATPase subunit E1	VHA-E1
261	AT5G56010.1	Heat shock protein 90-3	HSP90-3
262	AT1G20620.1	Catalase-3	CAT3
263	AT1G43170.1	60S ribosomal protein L3-1	ARP1
264	AT1G04690.1	Probable voltage-gated potassium channel subunit beta	KAB1
265	AT5G09810.1	Actin-7	ACT7
266	AT5G27850.1	60S ribosomal protein L18-3	RPL18C
267	AT3G27430.2	Proteasome subunit beta type-7-A	PBB1
268	AT2G35860.1	Fasciclin-like arabinogalactan protein 16	FLA16
269	AT5G40580.1	Proteasome subunit beta type-7-B	PBB2
270	AT5G02870.1	60S ribosomal protein L4-2	RPL4D
271	AT2G18020.1	60S ribosomal protein L8-1	RPL8A
272	AT2G44050.1	6,7-dimethyl-8-ribityllumazine synthase, chloroplastic
273	AT5G20290.1	40S ribosomal protein S8-1	RPS8A
274	AT2G01250.1	60S ribosomal protein L7-2	RPL7B
275	AT3G54400.1	Peptidase A1 domain-containing protein	AXX17_At3g48830
276	AT5G60160.1	AT5g60160/f15l12_20
277	AT3G09840.1	Cell division control protein 48 homolog A	CDC48A
278	AT4G13940.1	Adenosylhomocysteinase 1	SAHH1
279	AT1G07920.1	Elongation factor 1-alpha 3	A3
280	AT2G47610.1	60S ribosomal protein L7a-1	RPL7AA
281	AT3G13930.1	Dihydrolipoyllysine-residue acetyltransferase component 2 of pyruvate dehydrogenase complex, mitochondrial
282	AT1G41830.1	SKU5-similar 6	SKS6
283	AT3G62870.1	60S ribosomal protein L7a-2	RPL7AB
284	AT3G49010.1	60S ribosomal protein L13-1	RPL13B
285	AT1G02920.1	Glutathione S-transferase F7	GSTF7
286	AT1G57720.1	Probable elongation factor 1-gamma 2
287	AT5G20010.1	GTP-binding nuclear protein Ran-1	RAN1
288	AT2G44120.1	60S ribosomal protein L7-3	RPL7C
289	AT4G19410.1	Pectin acetylesterase 7	PAE7
290	AT1G50480.1	Formate--tetrahydrofolate ligase	THFS
291	AT2G37770.2	NADPH-dependent aldo-keto reductase, chloroplastic	AKR4C9
292	AT1G03220.1	Eukaryotic aspartyl protease family protein
293	AT1G28290.1	Non-classical arabinogalactan protein 31	AGP31
294	AT2G45220.1	Probable pectinesterase/pectinesterase inhibitor 17	PME17
295	AT3G04840.1	40S ribosomal protein S3a-1	RPS3AA
296	AT5G45280.2	Pectin acetylesterase 11	PAE11
297	AT1G18540.1	60S ribosomal protein L6-1	RPL6A
298	AT5G07830.1	Heparanase-like protein 1	GUS1 like
299	AT1G77120.1	Alcohol dehydrogenase class-P	ADH1
300	AT5G28540.1	Heat shock 70 kDa protein BIP1	BIP1
301	AT1G23410.1	Ubiquitin-40S ribosomal protein S27a-1	RPS27AA
302	AT1G65900.1	At1g65900/F12P19_7
303	AT2G34480.1	60S ribosomal protein L18a-2	RPL18AB
304	AT4G20850.1	Tripeptidyl-peptidase 2	TPP2
305	AT2G17360.1	40S ribosomal protein S4-1	RPS4A
306	AT1G22780.1	40S ribosomal protein S18	RPS18A
307	AT3G63190.1	Ribosome-recycling factor, chloroplastic	RRF
308	AT1G24360.1	3-oxoacyl-[acyl-carrier-protein] reductase, chloroplastic
309	AT4G16720.1	60S ribosomal protein L15-1	RPL15A
310	AT5G07030.1	Eukaryotic aspartyl protease family protein	MOJ9.20
311	AT1G55090.1	Glutamine-dependent NAD(+) synthetase
312	AT4G15165.1	Putative proteasome subunit alpha type-4-B	PAC2
313	AT2G18150.1	Peroxidase 15	PER15
314	AT5G15200.1	40S ribosomal protein S9-1	RPS9B
315	AT3G16530.1	Lectin-like protein At3g16530
316	AT3G04920.1	40S ribosomal protein S24-1	RPS24A
317	AT3G49910.1	60S ribosomal protein L26-1	RPL26A
318	AT2G31610.1	40S ribosomal protein S3-1	RPS3A
319	AT4G31700.1	40S ribosomal protein S6-1	RPS6A
320	AT5G50850.1	Pyruvate dehydrogenase E1 component subunit beta-1, mitochondrial	PDH2
321	AT2G42740.1	60S ribosomal protein L11-1	RPL11A
322	AT1G49750.1	AT1G49750 protein
323	AT1G14320.1	60S ribosomal protein L10-1	RPL10A
324	AT1G65960.1	Glutamate decarboxylase 2	GAD2
325	AT5G19550.1	Aspartate aminotransferase, cytoplasmic isozyme 1	ASP2
326	AT4G27090.1	60S ribosomal protein L14-2	RPL14B
327	AT3G25520.1	60S ribosomal protein L5-1	RPL5A
328	AT5G13690.1	Alpha-N-acetylglucosaminidase	NAGLU
329	AT3G03960.1	T-complex protein 1 subunit theta	CCT8
330	AT4G36430.1	Peroxidase 49	PER49
331	AT4G20890.1	Tubulin beta-9 chain	TUBB9
332	AT2G37270.1	40S ribosomal protein S5-1	RPS5A
333	AT3G52370.1	Fasciclin-like arabinogalactan protein 15	FLA15
334	AT2G40300.1	Ferritin-4, chloroplastic	FER4
335	AT1G23290.1	60S ribosomal protein L27a-2	RPL27AB
336	AT4G01870.1	TolB protein-like protein
337	AT1G47960.1	Cell wall / vacuolar inhibitor of fructosidase 1	C/VIF1
338	AT4G26270.1	ATP-dependent 6-phosphofructokinase 3	PFK3
339	AT1G65930.1	Cytosolic isocitrate dehydrogenase [NADP]	CICDH
340	AT3G05560.1	60S ribosomal protein L22-2	RPL22B
341	AT3G07110.1	60S ribosomal protein L13a-1	RPL13AA
342	AT1G72370.1	40S ribosomal protein Sa-1	RPSaA
343	AT1G18080.1	Receptor for activated C kinase 1A	RACK1A
344	AT2G30860.1	Glutathione S-transferase F9	GSTF9
345	AT1G31670.1	Precursor of CEP12	CEP12
346	AT2G41840.1	40S ribosomal protein S2-3	RPS2C
347	AT3G02080.1	40S ribosomal protein S19-1	RPS19A
348	AT3G11510.1	40S ribosomal protein S14-2	RPS14B
349	AT2G39460.1	60S ribosomal protein L23a-1	RPL23AA
350	AT4G25740.1	40S ribosomal protein S10-1	RPS10A
351	AT2G36160.1	40S ribosomal protein S14-1	RPS14A
352	AT5G39850.1	40S ribosomal protein S9-2	RPS9C
353	AT1G04820.1	Tubulin alpha-4 chain	TUBA4
354	AT3G43190.1	Sucrose synthase 4	SUS4
355	AT2G47550.1	Probable pectinesterase/pectinesterase inhibitor 20	PME20
356	AT3G49120.1	Peroxidase 34	PER34
357	AT3G60770.1	40S ribosomal protein S13-1	RPS13A
358	AT4G15000.1	60S ribosomal protein L27-3	RPL27C
359	AT1G07660.1	Histone H4
360	AT3G20050.1	T-complex protein 1 subunit alpha	CCT1
361	AT3G11830.1	T-complex protein 1 subunit eta	CCT7
362	AT5G06390.1	Fasciclin-like arabinogalactan protein 17	FLA17
363	AT5G66120.1	3-dehydroquinate synthase, chloroplastic	DHQS
364	AT2G20580.1	26S proteasome non-ATPase regulatory subunit 2 homolog A	RPN1A
365	AT1G67090.1	Ribulose bisphosphate carboxylase small subunit 1A, chloroplastic	RBCS-1A
366	AT3G12145.1	Leucine-rich repeat protein FLOR 1	FLR1
367	AT1G20200.1	26S proteasome non-ATPase regulatory subunit 3 homolog A	RPN3A
368	AT1G31710.1	Amine oxidase
369	AT5G44400.1	Berberine bridge enzyme-like 26
370	AT5G12110.1	Elongation factor 1-beta 1
371	AT5G27770.1	60S ribosomal protein L22-3	RPL22C
372	AT5G58390.1	Peroxidase 67	PER67
373	AT5G20830.1	Sucrose synthase 1	SUS1
374	AT1G45000.1	26S proteasome regulatory subunit S10B homolog B	RPT4B
375	AT4G34670.1	40S ribosomal protein S3a-2	RPS3AB
376	AT3G15356.1	Lectin-like protein LEC	LEC
377	AT1G35160.1	14-3-3-like protein GF14 phi	GRF4
378	AT1G36240.1	Putative 60S ribosomal protein L30-1	RPL30A
379	AT5G09900.1	26S proteasome non-ATPase regulatory subunit 12 homolog A	RPN5A
380	AT4G13930.1	Serine hydroxymethyltransferase 4	SHM4
381	AT1G14610.1	Valine--tRNA ligase, mitochondrial 1	TWN2
382	AT3G22230.1	60S ribosomal protein L27-2	RPL27B
383	AT3G06650.1	ATP-citrate synthase beta chain protein 1	ACLB-1
384	AT3G56090.1	Ferritin-3, chloroplastic	FER3
385	AT1G27400.1	60S ribosomal protein L17-1	RPL17A
386	AT4G27450.1	Aluminum induced protein with YGL and LRDR motifs	AT4g27450/F27G19_50
387	AT3G01390.1	V-type proton ATPase subunit G1	VHA-G1
388	AT3G48930.1	40S ribosomal protein S11-1	RPS11A
389	AT1G30230.1	Elongation factor 1-delta 1
390	AT5G23740.1	40S ribosomal protein S11-3	RPS11C
391	AT1G30700.1	Berberine bridge enzyme-like 8
392	AT2G40510.1	40S ribosomal protein S26-2	RPS26B
393	AT3G04230.1	40S ribosomal protein S16-2	RPS16B
394	AT3G46440.1	UDP-glucuronic acid decarboxylase 5	UXS5
395	AT2G16060.1	Non-symbiotic hemoglobin 1	AHB1
396	AT1G07770.1	40S ribosomal protein S15a-1	RPS15AA
397	AT3G45030.1	40S ribosomal protein S20-1	RPS20A
398	AT5G28060.1	40S ribosomal protein S24-2	RPS24B
399	AT3G10950.1	Putative 60S ribosomal protein L37a-1	RPL37AB
400	AT5G20990.1	Molybdopterin biosynthesis protein CNX1	CNX1
401	AT1G54220.1	Dihydrolipoyllysine-residue acetyltransferase component 3 of pyruvate dehydrogenase complex, mitochondrial
402	AT2G16600.1	Peptidyl-prolyl cis-trans isomerase CYP19-1	CYP19-1
403	AT1G53070.1	Lectin-like protein At1g53070
404	AT4G37800.1	Probable xyloglucan endotransglucosylase/hydrolase protein 7	XTH7
405	AT1G09590.1	60S ribosomal protein L21-1	RPL21A
406	AT1G44542.1	Cyclase-like protein 3	CYCLASE3
407	AT1G02780.1	60S ribosomal protein L19-1	RPL19A
408	AT2G39390.1	60S ribosomal protein L35-2	RPL35B
409	AT3G24830.1	60S ribosomal protein L13a-2	RPL13AB
410	AT1G54000.1	GDSL esterase/lipase 22	GLL22
411	AT1G26880.1	60S ribosomal protein L34-1	RPL34A
412	AT4G24820.1	26S proteasome non-ATPase regulatory subunit 6 homolog	RPN7
413	AT1G53280.1	Protein DJ-1 homolog B	DJ1B
414	AT3G58730.1	V-type proton ATPase subunit D	VHA-D
415	AT3G53020.1	60S ribosomal protein L24-2	RPL24B
416	AT3G06850.1	Lipoamide acyltransferase component of branched-chain alpha-keto acid dehydrogenase complex, mitochondrial	BCE2
417	AT1G07790.1	Histone H2B.1
418	AT2G33040.1	ATP synthase subunit gamma, mitochondrial	ATPC
419	AT2G17630.1	Phosphoserine aminotransferase 2, chloroplastic	PSAT2
420	AT1G54270.1	Eukaryotic initiation factor 4A-2	TIF4A-2
421	AT2G27710.1	60S acidic ribosomal protein P2-2	RPP2B
422	AT1G72150.1	Patellin-1	PATL1
423	AT2G26080.1	Glycine dehydrogenase (decarboxylating) 2, mitochondrial	GLDP2
424	AT4G12880.1	AtENODL19	AtENODL19
425	AT3G06860.1	Peroxisomal fatty acid beta-oxidation multifunctional protein MFP2	MFP2
426	AT2G06850.1	Xyloglucan endotransglucosylase/hydrolase protein 4	XTH4
427	AT3G53740.1	60S ribosomal protein L36-2	RPL36B
428	AT1G12840.1	V-type proton ATPase subunit C	VHA-C
429	AT1G35580.1	Alkaline/neutral invertase CINV1	CINV1
430	AT5G19990.1	26S proteasome regulatory subunit 8 homolog A	RPT6A
431	AT2G16360.1	40S ribosomal protein S25-1	RPS25A
432	AT1G56070.1	Elongation factor 2	LOS1
433	AT5G23540.1	26S proteasome non-ATPase regulatory subunit 14 homolog	RPN11
434	AT1G04480.1	60S ribosomal protein L23	RPL23A
435	AT5G63810.1	Beta-galactosidase 10	BGAL10
436	AT1G78060.1	Probable beta-D-xylosidase 7	BXL7
437	AT1G24510.1	T-complex protein 1 subunit epsilon	CCT5
438	AT2G37760.1	Aldo-keto reductase family 4 member C8	AKR4C8
439	AT4G26910.1	Dihydrolipoyllysine-residue succinyltransferase component of 2-oxoglutarate dehydrogenase complex 2, mitochondrial	At4g26910
440	AT5G57020.1	Glycylpeptide N-tetradecanoyltransferase 1	NMT1
441	AT4G32520.1	Serine hydroxymethyltransferase 3, chloroplastic	SHM3
442	AT1G32480.1	Putative isocitrate dehydrogenase [NAD] subunit-like 4	IDH4
443	AT3G59010.1	Probable pectinesterase/pectinesterase inhibitor 35	PME35
444	AT4G18100.1	60S ribosomal protein L32-1	RPL32A
445	AT1G48830.1	40S ribosomal protein S7-1	RPS7A
446	AT5G04710.1	Aspartyl aminopeptidase	T1E3_70
447	AT5G59880.1	Actin-depolymerizing factor 3	ADF3
448	AT3G09500.1	60S ribosomal protein L35-1	RPL35A
449	AT1G53750.1	26S proteasome regulatory subunit 7 homolog A	RPT1A
450	AT3G10920.1	Superoxide dismutase [Mn] 1, mitochondrial	MSD1
451	AT1G09780.1	2,3-bisphosphoglycerate-independent phosphoglycerate mutase 1	PGM1
452	AT5G11420.1	Uncharacterized protein At5g11420
453	AT3G18070.1	Beta-glucosidase 43	BGLU43
454	AT3G52880.1	Monodehydroascorbate reductase 1, peroxisomal	MDAR1
455	AT4G16660.1	Heat shock 70 kDa protein 17	HSP70-17
456	AT3G14415.1	(S)-2-hydroxy-acid oxidase GLO2	GLO2
457	AT4G31990.1	Aspartate aminotransferase, chloroplastic	ASP5
458	AT3G52200.1	Dihydrolipoyllysine-residue acetyltransferase component 1 of pyruvate dehydrogenase complex, mitochondrial	LTA3
459	AT3G16470.1	Jacalin-related lectin 35	JAL35
460	AT5G46430.1	60S ribosomal protein L32-2	RPL32B
461	AT3G22060.1	Cysteine-rich repeat secretory protein 38	CRRSP38
462	AT3G02560.1	40S ribosomal protein S7-2	RPS7B
463	AT5G16390.1	Biotin carboxyl carrier protein of acetyl-CoA carboxylase 1, chloroplastic	BCCP1
464	AT1G09200.1	Histone H3.2	HTR2
465	AT1G03475.1	Coproporphyrinogen-III oxidase 1, chloroplastic	CPX1
466	AT2G05920.1	Subtilisin-like protease SBT1.8	SBT1.8
467	AT2G42710.1	Ribosomal protein L1p/L10e family
468	AT1G78380.1	Glutathione S-transferase U19	GSTU19
469	AT5G41520.1	40S ribosomal protein S10-2	RPS10B
470	AT5G39120.1	Germin-like protein subfamily 1 member 15	At5g39120
471	AT3G08580.1	ADP,ATP carrier protein 1, mitochondrial	AAC1
472	AT5G14780.1	Formate dehydrogenase, chloroplastic/mitochondrial	FDH1
473	AT1G07070.1	60S ribosomal protein L35a-1	RPL35AA
474	AT1G02800.1	Endoglucanase 1	CEL2
475	AT2G21130.1	Peptidyl-prolyl cis-trans isomerase CYP19-2	CYP19-2
476	AT4G34870.1	Peptidyl-prolyl cis-trans isomerase CYP18-4	CYP18-4
477	AT1G15250.1	60S ribosomal protein L37-1	RPL37A
478	AT3G11270.1	26S proteasome non-ATPase regulatory subunit 7 homolog B	RPN8B
479	AT5G16070.1	T-complex protein 1 subunit zeta 2	CCT6B
480	AT1G49780.1	U-box domain-containing protein 26	PUB26
481	AT1G08360.1	60S ribosomal protein L10a-1	RPL10AA
482	AT4G02930.1	Elongation factor Tu, mitochondrial	TUFA
483	AT5G43940.1	Alcohol dehydrogenase class-3	ADH2
484	AT5G26710.1	Glutamate--tRNA ligase, cytoplasmic
485	AT1G23190.1	Probable phosphoglucomutase, cytoplasmic 1
486	AT1G29150.1	26S proteasome non-ATPase regulatory subunit 11 homolog	RPN6
487	AT5G58270.1	ABC transporter B family member 25, mitochondrial	ABCB25
488	AT4G34450.1	Coatomer subunit gamma
489	AT5G10770.1	Aspartyl protease family protein
490	AT5G49190.1	Sucrose synthase 2	SUS2
491	AT4G30920.1	Leucine aminopeptidase 2, chloroplastic	LAP2
492	AT3G10340.1	Phenylalanine ammonia-lyase 4	PAL4
493	AT3G12580.1	Heat shock 70 kDa protein 4	HSP70-4
494	AT1G32960.1	Subtilisin-like protease SBT3.3	SBT3.3
495	AT1G09640.1	Probable elongation factor 1-gamma 1	At1g09640
496	AT3G52990.1	Pyruvate kinase	At3g52990
497	AT5G17330.1	Glutamate decarboxylase 1	GAD1
498	AT5G63680.1	Pyruvate kinase	MBK5.16
499	AT5G53850.2	Probable bifunctional methylthioribulose-1-phosphate dehydratase/enolase-phosphatase E1	At5g53850
500	AT2G42910.1	Ribose-phosphate pyrophosphokinase 4	PRS4
501	AT3G55410.1	Oxoglutarate dehydrogenase (succinyl-transferring)
502	AT1G53310.1	Phosphoenolpyruvate carboxylase 1	PPC1
503	AT2G47510.1	Fumarate hydratase 1, mitochondrial	FUM1
504	AT5G08570.1	Pyruvate kinase	MAH20.13
505	AT5G19510.1	Elongation factor 1-beta 2
506	AT2G41220.1	Ferredoxin-dependent glutamate synthase 2, chloroplastic	GLU2
507	AT4G35830.1	Aconitate hydratase 1	ACO1
508	AT5G52920.1	Plastidial pyruvate kinase 2	PKP2
509	AT3G22960.1	Plastidial pyruvate kinase 1, chloroplastic	PKP1
510	AT5G16990.1	NADP-dependent alkenal double bond reductase P2	P2
511	AT5G53460.1	Glutamate synthase 1 [NADH], chloroplastic	GLT1
512	AT5G16970.1	NADPH-dependent oxidoreductase 2-alkenal reductase	AER
513	AT2G07698.1	ATP synthase subunit alpha, mitochondrial	At2g07698
514	AT5G15490.1	UDP-glucose 6-dehydrogenase 3	UGD3
515	AT3G13560.1	Glucan endo-1,3-beta-glucosidase 4	At3g13560
516	AT3G24503.1	Aldehyde dehydrogenase family 2 member C4	ALDH2C4
517	AT5G49460.1	ATP-citrate synthase beta chain protein 2	ACLB-2
518	AT2G42600.1	Phosphoenolpyruvate carboxylase 2	PPC2
519	AT1G32940.1	Subtilisin-like protease SBT3.5	SBT3.5
520	AT4G34180.1	Cyclase-like protein 1	CYCLASE1
521	AT5G56000.1	Heat shock protein 90-4	HSP90-4
522	AT4G24830.1	Argininosuccinate synthase, chloroplastic
523	AT4G26690.1	Glycerophosphodiester phosphodiesterase GDPDL3	GDPDL3
524	AT4G34260.1	Alpha-L-fucosidase 2	FUC95A
525	AT5G56350.1	Pyruvate kinase	MCD7.8
526	AT3G05180.1	GDSL esterase/lipase At3g05180	At3g05180
527	AT3G10740.1	Alpha-L-arabinofuranosidase 1	ASD1
528	AT3G09820.1	Adenosine kinase 1	ADK1
529	AT3G27300.1	Glucose-6-phosphate 1-dehydrogenase 5, cytoplasmic	G6PD5
530	AT3G55260.1	Beta-hexosaminidase 1	HEXO1
531	AT1G12775.1	Pentatricopeptide repeat-containing protein At1g12775, mitochondrial	At1g12775
532	AT5G10920.1	Argininosuccinate lyase, chloroplastic	At5g10920
533	AT4G36195.1	Prolyl carboxypeptidase like protein
534	AT2G21330.1	Fructose-bisphosphate aldolase 1, chloroplastic	FBA1
535	AT2G05990.1	Enoyl-[acyl-carrier-protein] reductase [NADH], chloroplastic	MOD1
536	AT4G23170.1	Putative cysteine-rich receptor-like protein kinase 9	CRK9
537	AT1G29880.1	Glycine--tRNA ligase, mitochondrial 1
538	AT2G27450.1	N-carbamoylputrescine amidase	CPA
539	ATCG00120.1	ATP synthase subunit alpha, chloroplastic	atpA
540	AT4G26870.1	Aspartate--tRNA ligase 1, cytoplasmic	At4g26870
541	AT5G07350.1	Ribonuclease TUDOR 1	TSN1
542	AT1G52400.1	Beta-D-glucopyranosyl abscisate beta-glucosidase	BGLU18
543	AT3G06930.1	Probable histone-arginine methyltransferase 1.3	PRMT13
544	AT5G41250.1	Probable xyloglucan galactosyltransferase GT20	GT20
545	AT3G07750.1	3'-5'-exoribonuclease family protein	MLP3.20
546	AT3G53180.1	Nodulin/glutamine synthase-like protein	NodGS
547	AT1G53510.1	Mitogen-activated protein kinase 18	MPK18
548	AT5G25780.1	Eukaryotic translation initiation factor 3 subunit B	EIF3B-2
549	AT2G27150.1	Abscisic-aldehyde oxidase	AAO3
550	AT4G27490.1	Exosome complex component RRP41-like	RRP41L
551	AT4G10320.1	Isoleucine--tRNA ligase, cytoplasmic	At4g10320
552	AT3G27530.1	Golgin candidate 6	GC6
553	AT1G36280.1	Adenylosuccinate lyase
554	AT2G45470.1	Fasciclin-like arabinogalactan protein 8
555	AT4G04320.1	Malonyl-CoA decarboxylase family protein
556	AT2G18230.1	Soluble inorganic pyrophosphatase 2	PPA2
557	AT1G72160.1	Patellin-3	PATL3
558	AT4G08900.1	Arginase 1, mitochondrial	ARGAH1
559	AT4G03080.1	Serine/threonine-protein phosphatase BSL1	BSL1
560	AT4G17260.1	L-lactate dehydrogenase	dl4665w
561	AT1G05260.1	Peroxidase 3	PER3
562	AT2G20450.1	60S ribosomal protein L14-1	RPL14A
563	AT5G51930.1	Glucose-methanol-choline (GMC) oxidoreductase family protein	MSG15.1

## Sheet: Tab S. 3
Table S3. List of all genes encoding cell wall loosening proteins and enzymes generating reducing sugars identified in each ecotype (Col-0, Ws-0) and in eds1 mutants. Proteins identified in Maldi-TOF analysis of 150 kDa fraction from hypocotyls and roots samples collected 7 days after start of root hypoxia stress. Gene hierarchy in the Table corresponding to the number of peptides identified for …
Number	ATG code	Genotype and ecotype	Biological function	Based on enzymatic activity	CAZY family	Group in family	Ath name	Enzymatic activity	Ref
		Protein name
Col-0
1	AT3G54420.1	Endochitinase EP3	Fungal defense	chitinase	GH19	#N/A	#N/A	#N/A	#N/A
2	AT4G15210.1	Beta-amylase 5	Starch degradation	β-amylase	GH14		RAM1; REDUCED BETA AMYLASE 1 cytoplasm
3	AT3G47000.1	Beta-glucosidase	XG modification	β-glucosidase	GH3	glucosidase clade		putative glucosidase	Iglesias 2006
Ws-0
1	AT5G13980.1	Probable alpha-mannosidase	Protein modification		GH38
2	AT5G34940.2	Heparanase-like protein 3	AGP modification	β-glucuronidase	GH79		GUS3
3	AT4G16260.1	Probable glucan endo-1,3-beta-glucosidase	Callose degradation	β-1,3-glucanase	GH17		PR2	β-1,3-endoglucanse
4	AT5G64570.1	Beta-D-xylosidase 4	Xylan modification	β-xylosidase	GH3	xylosidase clade	Xyl4	α-L-arabinofuranosidase / β-1,4-xylosidase	Minic 2004
5	AT4G31140.1	Glucan endo-1,3-beta-glucosidase 5	Callose degradation	β-1,3-glucanase	GH17,CBM43
6	AT3G09260.1	Beta-glucosidase 23	Deglycosylation of metabolites	β-glucosidase	GH1
7	AT5G08370.1	Alpha-galactosidase 2	Mannan/raffiose degradation	α-galactosidase	GH27		AGAL2		Tapernoux-Lüthi et al., 2004
8	AT5G10560.1	Probable beta-D-xylosidase 6	Xylan modification	α-L-arabinofuranosidase / β-1,4-xylosidase	GH3	xylosidase clade		α-L-arabinofuranosidase / β-1,4-xylosidase	Iglesias 2006
9	AT1G11580.1	Pectinesterase/pectinesterase inhibitor 18	not generating reducing ends, pectin modification	putative PME	CE8
10	AT3G12500.1	Basic endochitinase B	Fungal defense	chitinase	GH19, CBM18
11	AT5G25980.1	Myrosinase 2	Deglycosylation of metabolites	myrosinase	GH1		TGG2, BGLU37
12	AT1G61820.1	Beta-glucosidase 46	Deglycosulation of metabolites	β-glucosidase	GH1	#N/A	#N/A	#N/A	#N/A
13	AT3G26380.1	Alpha-galactosidase	AGP degradation	β-L-arabinopyranosidase	GH27		ASPE		Imaizumi 2017
14	AT3G13560.1	Glucan endo-1,3-beta-glucosidase 4	Callose degradation	β-1,3-glucanase	GH17, CBM43
15	AT3G61490.1	Pectin lyase-like superfamily protein	Pectin degradation	polygalacturonase	GH28
eds1 (Col-0)
1	AT5G34940.2	Heparanase-like protein 3	AGP modification	β-glucuronidase	GH79		GUS3
2	AT4G19410.1	Pectin acetylesterase 7	not generating reducing sugars, pectin modification	putative pectin acetyl esterase	CE13	clade 2	PAE7		Philippe et al., 2017
3	AT2G45220.1	Probable pectinesterase/pectinesterase inhibitor 17	not generating reducing sugars, pectin modification	putative PME	CE8
4	AT5G45280.2	Pectin acetylesterase 11	not generating reducing sugars. pectin modification	putative pectin acetyl esterase	CE13	clade 2	PAE11		Philippe et al., 2017
5	AT5G07830.1	Heparanase-like protein 1	AGP modification	β-glucuronidase	GH79		GUS2	β-glucuronidase	Eudes et al., 2008
6	AT5G08370.1	Alpha-galactosidase 2	Mannan/raffiose degradation	α-galactosidase	GH27		AGAL2		Tapernoux-Lüthi et al., 2004
7	AT5G13690.1	Alpha-N-acetylglucosaminidase			GH89
8	AT3G09260.1	Beta-glucosidase 23	Deglycosylation of metabolites	β-glucosidase	GH1		BGLU23
9	AT2G47550.1	Probable pectinesterase/pectinesterase inhibitor 20	not generating reducing sugars, pectin modification	putative PME	CE8
10	AT3G12500.1	Basic endochitinase B	Fungal defense	chitinase	GH19, CBM18		PR3
11	AT4G31140.1	Glucan endo-1,3-beta-glucosidase 5	Callose degradation	β-1,3-glucanase	GH17	GH17,CBM43
12	AT3G26380.1	Alpha-galactosidase	AGP degradation	β-l-arabinopyranosidase	GH27		ASPE		Imaizumi 2017
13	AT4G37800.1	Probable xyloglucan endotransglucosylase/hydrolase protein 7	XG modification	XTH	GH16	XET, group1	XTH7
14	AT2G06850.1	Xyloglucan endotransglucosylase/hydrolase protein 4	XG modification	XTH	GH16	XET, group1	XTH4, EXGT-A1
15	AT1G35580.1	Alkaline/neutral invertase CINV1	Sucrose degradation	neutral/alkaline invertase	GH100		CINV1 / A/N-InvG is an alkaline/neutral invertase cytoplasm
16	AT5G63810.1	Beta-galactosidase 10	XG modification	xyloglucan β-galactosidase	GH35	group a5	BGAL10		Sampedro 2012, Gantulga et al., 2009
17	AT1G78060.1	Probable beta-D-xylosidase 7	Xylan modification	β-1,4-xylosidase	GH3	xylosidase clade	BXYL7	α-L-arabinofuranosidase / β-1,4-xylosidase	Iglesias 2006
18	AT3G59010.1	Probable pectinesterase/pectinesterase inhibitor 35	not generating reducing sugars, pectin modification	putative PME	CE8		PME61
19	AT3G18070.1	Beta-glucosidase 43	Deglycosylation of metabolites		GH1
20	AT1G11580.1	Pectinesterase/pectinesterase inhibitor 18	not generating reducing sugars. pectin modification	putative PME	CE8
21	AT4G16260.1	Probable glucan endo-1,3-beta-glucosidase At4g16260	Callose degradation	β-1,3-glucanase	GH17		PR2	β-1,3-endoglucanse
22	AT1G02800.1	Endoglucanase 1 Cellulase 2	Cellulose degradation	Endo-glucanase	GH9		GH9B2, Cel2
eds1 (Ws-0)
1	AT5G13980.1	Probable alpha-mannosidase	Protein deglycosylation		GH38
2	AT3G26720.1	Alpha-mannosidase	Protein deglycosylation		GH38
3	AT3G09260.1	Beta-glucosidase 23	Deglycosylation of metabolites	β-glucosidase	GH1		BGLU23
4	AT5G64570.1	Beta-D-xylosidase 4	Xylan modification	β-1,4-xylosidase	GH3	xylosidase clade	Xyl4	α-L-arabinofuranosidase / β-1,4-xylosidase	Minic 2004
5	AT5G34940.2	Heparanase-like protein 3	AGP modification	β-glucuronidase	GH79		GUS3
6	AT3G12500.1	Basic endochitinase B	Fungal defense	chitinase	GH19, CBM18
7	AT3G13560.1	Glucan endo-1,3-beta-glucosidase 4	Callose degradation	β-1,3-glucanase	GH17	GH17,CBM43
8	AT4G31140.1	Glucan endo-1,3-beta-glucosidase 5	Callose degradation	β-1,3-glucanase	GH17	GH17,CBM43
9	AT5G08370.1	Alpha-galactosidase 2	Mannan/raffiose degradation	α-galactosidase	GH27		AGAL2		Tapernoux-Lüthi et al., 2004
10	AT5G07830.1	Heparanase-like protein 1	AGP modification	β-glucuronidase	GH79		GUS2	β-glucuronidase	Eudes et al., 2008
11	AT4G34260.1	Alpha-L-fucosidase 2	XG modification	α-fucosidase	GH95		AXY8, FUC95A		Gunl 2011
12	AT3G10740.1	Alpha-L-arabinofuranosidase 1	Pectin/Xylan/AGP modification	α-L-arabinofuranosidase / β-1,4-xylosidase	GH51		Asd1,AraF1	α-L-arabinofuranosidase / β-xylosidase bifunctional EC 3.2.1.37	Chavez Montes et al., 2008
13	AT3G55260.1	Beta-hexosaminidase 1			GH20
14	AT5G63810.1	Beta-galactosidase 10	XG modification	xyloglucan β-galactosidase	GH35	group a5	BGAL10		Sampedro 2012, Gantulga et al., 2009
15	AT1G11580.1	Pectinesterase/pectinesterase inhibitor 18	not generating reducing sugars, pectin modification	putative PME	CE8
16	AT1G52400.1	Beta-D-glucopyranosyl abscisate beta-glucosidase	Deglycosylation of metabolites	β-glucosidase	GH1		BGLU18
17	AT3G26380.1	Alpha-galactosidase	AGP degradation	β-L-arabinopyranosidase	GH27		ASPE		Imaizumi 2017

## Sheet: Tab S. 4 
Table S4. List of all genes encoding cell wall loosening (CWL) proteins and enzymes generating reducing sugars. Proteins identified in Maldi-TOF analysis of 150 kDa fraction from Arabidopsis hypocotyls and roots samples collected 7 days after start of root hypoxia stress. Gene hierarchy in the Table corresponding to the number of peptides identified for a given protein in the Maldi-TOF analysis o…
Number	ATG	Protein name
1	AT3G54420.1	Endochitinase EP3
2	AT4G15210.1	Beta-amylase 5
3	AT3G47000.1	Beta-glucosidase
4	AT5G34940.2	Heparanase-like protein 3
5	AT5G64570.1	Beta-D-xylosidase 4
6	AT4G31140.1	Glucan endo-1,3-beta-glucosidase 5
7	AT3G09260.1	Beta-glucosidase 23
8	AT5G08370.1	Alpha-galactosidase 2
9	AT5G10560.1	Probable beta-D-xylosidase 6
10	AT1G11580.1	Pectinesterase/pectinesterase inhibitor 18
11	AT3G12500.1	Basic endochitinase B
12	AT5G25980.1	Myrosinase 2
13	AT1G61820.1	Beta-glucosidase 46
14	AT3G26380.1	Alpha-galactosidase
15	AT3G13560.1	Glucan endo-1,3-beta-glucosidase 4
16	AT3G61490.1	Pectin lyase-like superfamily protein
17	AT4G19410.1	Pectin acetylesterase 7
18	AT2G45220.1	Probable pectinesterase/pectinesterase inhibitor 17
19	AT5G45280.2	Pectin acetylesterase 11
20	AT5G07830.1	Heparanase-like protein 1
21	AT5G13690.1	Alpha-N-acetylglucosaminidase
22	AT2G47550.1	Probable pectinesterase/pectinesterase inhibitor 20
23	AT4G37800.1	Probable xyloglucan endotransglucosylase/hydrolase protein 7
24	AT2G06850.1	Xyloglucan endotransglucosylase/hydrolase protein 4
25	AT1G35580.1	Alkaline/neutral invertase CINV1
26	AT5G63810.1	Beta-galactosidase 10
27	AT1G78060.1	Probable beta-D-xylosidase 7
28	AT3G59010.1	Probable pectinesterase/pectinesterase inhibitor 35
29	AT3G18070.1	Beta-glucosidase 43
30	AT4G16260.1	Probable glucan endo-1,3-beta-glucosidase At4g16260
31	AT1G02800.1	Endoglucanase 1 Cellulase 2
32	AT5G13980.1	Probable alpha-mannosidase
33	AT3G26720.1	Alpha-mannosidase
34	AT3G13560.1	Glucan endo-1,3-beta-glucosidase 4
35	AT4G34260.1	Alpha-L-fucosidase 2
36	AT3G10740.1	Alpha-L-arabinofuranosidase 1
37	AT3G55260.1	Beta-hexosaminidase 1
38	AT1G52400.1	Beta-D-glucopyranosyl abscisate beta-glucosidase

## Sheet: Tab S. 5
Table S5. Overrepresentation test of genes encoding proteins identified in Maldi-TOF analysis of 150 kDa fraction of proteins from hypocotyls and roots samples collected 7 days after start of root hypoxia stress.
Analysis Type:	PANTHER Overrepresentation Test (Released 20221013)
Annotation Version and Release Date:	GO Ontology database DOI: 10.5281/zenodo.6799722 Released 2022-07-01
Analyzed List:	proteins identified using Maldi-TOF in hypocotyl in hypoxia stress (from table S2) (Arabidopsis thaliana)
Reference List:	Arabidopsis thaliana (all genes in database)
Test Type:	FISHER
Correction:	FDR
	Reference list	proteins identified using Maldi-TOF in hypocotyl in hypoxia stress (from table S2) (Arabidopsis thaliana)
Uniquely Mapped IDS:	27430 out of 27430	441 out of 444
Unmapped IDs:	0	120
Multiple mapping information:	0	1
GO biological process complete	Arabidopsis thaliana - REFLIST (27430)	Proteins identified using Maldi-TOF in hypocotyl in hypoxia stress (Arabidopsis thaliana) (444)	Proteins identified using Maldi-TOF in hypocotyl in hypoxia stress (Arabidopsis thaliana) (expected)	Proteins identified using Maldi-TOF in hypocotyl in hypoxia stress (Arabidopsis thaliana)(over/under)	Proteins identified using Maldi-TOF in hypocotyl in hypoxia stress (Arabidopsis thaliana) (fold Enrichment)	Proteins identified using Maldi-TOF in hypocotyl in hypoxia stress (Arabidopsis thaliana)(raw P-value)	Proteins identified using Maldi-TOF in hypocotyl in hypoxia stress (Arabidopsis thaliana) (FDR)
protein hexamerization (GO:0034214)	2	2	0.03	+	61.78	0.00149	0.035
cinnamic acid biosynthetic process (GO:0009800)	5	3	0.08	+	37.07	0.000212	0.00633
glutamate catabolic process (GO:0006538)	11	6	0.18	+	33.7	1.68e-07	7.81e-06
cinnamic acid metabolic process (GO:0009803)	6	3	0.1	+	30.89	0.000314	0.00884
glutamine family amino acid catabolic process (GO:0009065)	18	8	0.29	+	27.46	4.73e-09	2.87e-07
dicarboxylic acid catabolic process (GO:0043649)	14	6	0.23	+	26.48	5.07e-07	2.16e-05
glutamate metabolic process (GO:0006536)	27	11	0.44	+	25.17	1.21e-11	8.8e-10
arabinan catabolic process (GO:0031222)	8	3	0.13	+	23.17	0.000602	0.0158
arabinan metabolic process (GO:0031221)	9	3	0.15	+	20.59	0.000794	0.0205
L-phenylalanine catabolic process (GO:0006559)	9	3	0.15	+	20.59	0.000794	0.0204
secondary alcohol metabolic process (GO:1902652)	12	4	0.19	+	20.59	9.93e-05	0.00327
fructose 1,6-bisphosphate metabolic process (GO:0030388)	12	4	0.19	+	20.59	9.93e-05	0.00325
malate metabolic process (GO:0006108)	18	6	0.29	+	20.59	1.67e-06	6.67e-05
isocitrate metabolic process (GO:0006102)	12	4	0.19	+	20.59	9.93e-05	0.00323
erythrose 4-phosphate/phosphoenolpyruvate family amino acid catabolic process (GO:1902222)	9	3	0.15	+	20.59	0.000794	0.0203
cellular response to aldehyde (GO:0110096)	13	4	0.21	+	19.01	0.000128	0.00404
response to zinc ion (GO:0010043)	46	14	0.74	+	18.8	4.92e-13	3.91e-11
gluconeogenesis (GO:0006094)	23	7	0.37	+	18.8	3.68e-07	1.61e-05
ADP metabolic process (GO:0046031)	56	17	0.91	+	18.75	1.58e-15	1.69e-13
purine ribonucleoside diphosphate metabolic process (GO:0009179)	56	17	0.91	+	18.75	1.58e-15	1.66e-13
purine nucleoside diphosphate metabolic process (GO:0009135)	56	17	0.91	+	18.75	1.58e-15	1.63e-13
formaldehyde catabolic process (GO:0046294)	10	3	0.16	+	18.53	0.00102	0.025
formaldehyde metabolic process (GO:0046292)	10	3	0.16	+	18.53	0.00102	0.0249
nucleobase catabolic process (GO:0046113)	10	3	0.16	+	18.53	0.00102	0.0248
ATP generation from ADP (GO:0006757)	54	16	0.87	+	18.3	1.48e-14	1.32e-12
glycolytic process (GO:0006096)	54	16	0.87	+	18.3	1.48e-14	1.3e-12
nucleoside diphosphate phosphorylation (GO:0006165)	62	18	1	+	17.94	4.44e-16	5.03e-14
glutamine family amino acid metabolic process (GO:0009064)	59	17	0.96	+	17.8	3.26e-15	3.25e-13
ribonucleoside diphosphate metabolic process (GO:0009185)	61	17	0.99	+	17.22	5.2e-15	5.1e-13
translational elongation (GO:0006414)	36	10	0.58	+	17.16	2.32e-09	1.45e-07
nucleotide phosphorylation (GO:0046939)	66	18	1.07	+	16.85	1.12e-15	1.22e-13
pentose-phosphate shunt (GO:0006098)	33	9	0.53	+	16.85	1.7e-08	9.29e-07
hexose biosynthetic process (GO:0019319)	26	7	0.42	+	16.63	7.41e-07	3.03e-05
NADPH regeneration (GO:0006740)	35	9	0.57	+	15.89	2.63e-08	1.37e-06
xylan catabolic process (GO:0045493)	16	4	0.26	+	15.44	0.000251	0.00732
UDP-L-arabinose metabolic process (GO:0033356)	12	3	0.19	+	15.44	0.00158	0.0368
hemicellulose catabolic process (GO:2000895)	16	4	0.26	+	15.44	0.000251	0.00729
nitrogen cycle metabolic process (GO:0071941)	16	4	0.26	+	15.44	0.000251	0.00725
cellular detoxification of aldehyde (GO:0110095)	12	3	0.19	+	15.44	0.00158	0.0367
pyruvate metabolic process (GO:0006090)	81	20	1.31	+	15.25	1.48e-16	1.85e-14
nucleoside diphosphate metabolic process (GO:0009132)	77	19	1.25	+	15.24	8.62e-16	9.58e-14
tricarboxylic acid metabolic process (GO:0072350)	21	5	0.34	+	14.71	5e-05	0.00171
glutamine metabolic process (GO:0006541)	17	4	0.28	+	14.54	0.000307	0.00876
cell wall polysaccharide catabolic process (GO:0044347)	17	4	0.28	+	14.54	0.000307	0.00872
acetyl-CoA biosynthetic process (GO:0006085)	17	4	0.28	+	14.54	0.000307	0.00868
glucose 6-phosphate metabolic process (GO:0051156)	39	9	0.63	+	14.26	5.89e-08	2.96e-06
ribosomal large subunit assembly (GO:0000027)	26	6	0.42	+	14.26	1.01e-05	0.000375
indole-containing compound catabolic process (GO:0042436)	13	3	0.21	+	14.26	0.00193	0.0443
protein refolding (GO:0042026)	35	8	0.57	+	14.12	3.46e-07	1.53e-05
aromatic amino acid family catabolic process (GO:0009074)	22	5	0.36	+	14.04	6.06e-05	0.00203
arginine metabolic process (GO:0006525)	18	4	0.29	+	13.73	0.00037	0.0102
purine ribonucleoside triphosphate metabolic process (GO:0009205)	105	23	1.7	+	13.53	7.52e-18	1.14e-15
NADP metabolic process (GO:0006739)	46	10	0.74	+	13.43	1.76e-08	9.5e-07
glucose metabolic process (GO:0006006)	46	10	0.74	+	13.43	1.76e-08	9.42e-07
ATP metabolic process (GO:0046034)	97	21	1.57	+	13.37	2.54e-16	3.11e-14
alpha-amino acid catabolic process (GO:1901606)	90	19	1.46	+	13.04	1.01e-14	9.64e-13
purine nucleoside triphosphate metabolic process (GO:0009144)	109	23	1.76	+	13.04	1.54e-17	2.21e-15
maturation of LSU-rRNA from tricistronic rRNA transcript (SSU-rRNA, 5.8S rRNA, LSU-rRNA) (GO:0000463)	19	4	0.31	+	13.01	0.000442	0.012
tricarboxylic acid cycle (GO:0006099)	48	10	0.78	+	12.87	2.51e-08	1.32e-06
glutamine family amino acid biosynthetic process (GO:0009084)	29	6	0.47	+	12.78	1.73e-05	0.000626
dicarboxylic acid metabolic process (GO:0043648)	92	19	1.49	+	12.76	1.44e-14	1.3e-12
cellular amino acid catabolic process (GO:0009063)	94	19	1.52	+	12.49	2.02e-14	1.75e-12
aldehyde catabolic process (GO:0046185)	20	4	0.32	+	12.36	0.000524	0.014
cytoplasmic translation (GO:0002181)	76	15	1.23	+	12.19	1.55e-11	1.1e-09
ribonucleoside triphosphate metabolic process (GO:0009199)	117	23	1.89	+	12.14	6e-17	7.85e-15
nicotinamide nucleotide metabolic process (GO:0046496)	56	11	0.91	+	12.14	8.54e-09	4.98e-07
pyridine nucleotide metabolic process (GO:0019362)	57	11	0.92	+	11.92	1e-08	5.79e-07
acetyl-CoA metabolic process (GO:0006084)	27	5	0.44	+	11.44	0.000142	0.00441
nucleoside triphosphate metabolic process (GO:0009141)	128	23	2.07	+	11.1	3.37e-16	3.89e-14
maturation of LSU-rRNA (GO:0000470)	45	8	0.73	+	10.98	1.84e-06	7.32e-05
ribosomal large subunit biogenesis (GO:0042273)	96	17	1.55	+	10.94	3.15e-12	2.38e-10
acyl-CoA biosynthetic process (GO:0071616)	23	4	0.37	+	10.74	0.000834	0.021
thioester biosynthetic process (GO:0035384)	23	4	0.37	+	10.74	0.000834	0.0209
monosaccharide biosynthetic process (GO:0046364)	47	8	0.76	+	10.52	2.46e-06	9.65e-05
pyridine-containing compound metabolic process (GO:0072524)	67	11	1.08	+	10.14	4.42e-08	2.24e-06
response to cadmium ion (GO:0046686)	92	15	1.49	+	10.07	1.69e-10	1.12e-08
carboxylic acid catabolic process (GO:0046395)	157	24	2.54	+	9.44	1.93e-15	1.96e-13
cell wall macromolecule catabolic process (GO:0016998)	33	5	0.53	+	9.36	0.000326	0.00915
purine ribonucleotide metabolic process (GO:0009150)	203	30	3.29	+	9.13	1.28e-18	2.09e-16
hexose metabolic process (GO:0019318)	88	13	1.42	+	9.13	8.17e-09	4.81e-07
purine nucleotide metabolic process (GO:0006163)	211	31	3.42	+	9.08	3.9e-19	6.96e-17
ribosome assembly (GO:0042255)	70	10	1.13	+	8.83	5.79e-07	2.42e-05
cellular aldehyde metabolic process (GO:0006081)	50	7	0.81	+	8.65	3.3e-05	0.00118
organic acid catabolic process (GO:0016054)	172	24	2.78	+	8.62	1.19e-14	1.09e-12
purine-containing compound metabolic process (GO:0072521)	231	32	3.74	+	8.56	4.92e-19	8.51e-17
translation (GO:0006412)	538	74	8.71	+	8.5	6.13e-43	4.51e-40
peptide biosynthetic process (GO:0043043)	543	74	8.79	+	8.42	1.09e-42	7.12e-40
sulfur amino acid metabolic process (GO:0000096)	52	7	0.84	+	8.32	4.14e-05	0.00144
purine ribonucleoside triphosphate biosynthetic process (GO:0009206)	45	6	0.73	+	8.24	0.000155	0.0048
amide biosynthetic process (GO:0043604)	605	80	9.79	+	8.17	2.45e-45	2.06e-42
nucleotide-sugar metabolic process (GO:0009225)	53	7	0.86	+	8.16	4.63e-05	0.0016
ribonucleotide metabolic process (GO:0009259)	229	30	3.71	+	8.09	2.57e-17	3.59e-15
purine nucleoside triphosphate biosynthetic process (GO:0009145)	46	6	0.74	+	8.06	0.000173	0.0053
ribose phosphate metabolic process (GO:0019693)	238	31	3.85	+	8.05	8.63e-18	1.27e-15
protein peptidyl-prolyl isomerization (GO:0000413)	39	5	0.63	+	7.92	0.000653	0.0171
monosaccharide metabolic process (GO:0005996)	127	16	2.06	+	7.78	1.27e-09	8.09e-08
carbohydrate catabolic process (GO:0016052)	232	29	3.76	+	7.72	2.71e-16	3.26e-14
chaperone cofactor-dependent protein refolding (GO:0051085)	48	6	0.78	+	7.72	0.000214	0.00632
'de novo' post-translational protein folding (GO:0051084)	48	6	0.78	+	7.72	0.000214	0.00629
nucleotide metabolic process (GO:0009117)	313	39	5.07	+	7.7	1.8e-21	3.54e-19
protein folding (GO:0006457)	201	25	3.25	+	7.68	3.55e-14	3.03e-12
response to metal ion (GO:0010038)	253	31	4.1	+	7.57	4.12e-17	5.64e-15
sulfur amino acid biosynthetic process (GO:0000097)	41	5	0.66	+	7.53	0.000803	0.0205
peptide metabolic process (GO:0006518)	622	75	10.07	+	7.45	6.04e-40	2.96e-37
nucleoside phosphate metabolic process (GO:0006753)	324	39	5.24	+	7.44	5.47e-21	1.01e-18
small molecule catabolic process (GO:0044282)	254	30	4.11	+	7.3	3.32e-16	3.91e-14
nucleobase-containing small molecule metabolic process (GO:0055086)	415	49	6.72	+	7.29	8.4e-26	1.9e-23
serine family amino acid metabolic process (GO:0009069)	61	7	0.99	+	7.09	0.000104	0.00333
cellular amide metabolic process (GO:0043603)	733	83	11.86	+	7	2.05e-42	1.21e-39
'de novo' protein folding (GO:0006458)	53	6	0.86	+	6.99	0.000349	0.00968
purine nucleotide biosynthetic process (GO:0006164)	115	13	1.86	+	6.98	1.44e-07	6.77e-06
serine family amino acid biosynthetic process (GO:0009070)	45	5	0.73	+	6.86	0.00118	0.0283
reactive oxygen species metabolic process (GO:0072593)	72	8	1.17	+	6.86	4.14e-05	0.00145
purine-containing compound biosynthetic process (GO:0072522)	118	13	1.91	+	6.81	1.89e-07	8.69e-06
purine ribonucleotide biosynthetic process (GO:0009152)	109	12	1.76	+	6.8	5.63e-07	2.37e-05
ribonucleoside triphosphate biosynthetic process (GO:0009201)	57	6	0.92	+	6.5	0.000498	0.0133
response to hydrogen peroxide (GO:0042542)	76	8	1.23	+	6.5	5.89e-05	0.00198
acyl-CoA metabolic process (GO:0006637)	48	5	0.78	+	6.44	0.00153	0.036
thioester metabolic process (GO:0035383)	48	5	0.78	+	6.44	0.00153	0.0358
benzene-containing compound metabolic process (GO:0042537)	58	6	0.94	+	6.39	0.000543	0.0144
alpha-amino acid metabolic process (GO:1901605)	368	38	5.96	+	6.38	2.08e-18	3.3e-16
chaperone-mediated protein folding (GO:0061077)	69	7	1.12	+	6.27	0.000211	0.00632
nucleoside triphosphate biosynthetic process (GO:0009142)	63	6	1.02	+	5.88	0.000812	0.0206
ribose phosphate biosynthetic process (GO:0046390)	138	13	2.23	+	5.82	9.77e-07	3.97e-05
aspartate family amino acid metabolic process (GO:0009066)	64	6	1.04	+	5.79	0.000876	0.0218
monocarboxylic acid catabolic process (GO:0072329)	64	6	1.04	+	5.79	0.000876	0.0217
proteasomal protein catabolic process (GO:0010498)	299	28	4.84	+	5.79	6.38e-13	5.01e-11
ribonucleotide biosynthetic process (GO:0009260)	133	12	2.15	+	5.57	3.85e-06	0.000149
nucleotide biosynthetic process (GO:0009165)	169	15	2.74	+	5.48	2.93e-07	1.32e-05
cellular amino acid metabolic process (GO:0006520)	566	50	9.16	+	5.46	3.36e-21	6.37e-19
nucleoside phosphate biosynthetic process (GO:1901293)	172	15	2.78	+	5.39	3.61e-07	1.59e-05
generation of precursor metabolites and energy (GO:0006091)	407	35	6.59	+	5.31	8.1e-15	7.82e-13
aerobic respiration (GO:0009060)	130	11	2.1	+	5.23	1.7e-05	0.000619
organonitrogen compound biosynthetic process (GO:1901566)	1431	117	23.16	+	5.05	4.1e-47	4.02e-44
cellular macromolecule biosynthetic process (GO:0034645)	947	77	15.33	+	5.02	2.8e-30	7.17e-28
alpha-amino acid biosynthetic process (GO:1901607)	175	14	2.83	+	4.94	2.28e-06	9.03e-05
cellular amino acid biosynthetic process (GO:0008652)	190	15	3.08	+	4.88	1.16e-06	4.69e-05
ribosomal small subunit biogenesis (GO:0042274)	89	7	1.44	+	4.86	0.000875	0.0218
ribosome biogenesis (GO:0042254)	370	29	5.99	+	4.84	1.42e-11	1.02e-09
cellular respiration (GO:0045333)	155	12	2.51	+	4.78	1.63e-05	0.000601
energy derivation by oxidation of organic compounds (GO:0015980)	170	13	2.75	+	4.72	8.26e-06	0.00031
cellular nitrogen compound biosynthetic process (GO:0044271)	1309	100	21.19	+	4.72	1.68e-37	7.07e-35
response to reactive oxygen species (GO:0000302)	165	12	2.67	+	4.49	2.91e-05	0.00105
ribonucleoprotein complex assembly (GO:0022618)	141	10	2.28	+	4.38	0.000162	0.00498
organophosphate metabolic process (GO:0019637)	599	42	9.7	+	4.33	1.13e-14	1.06e-12
polysaccharide catabolic process (GO:0000272)	143	10	2.31	+	4.32	0.00018	0.00547
ribonucleoprotein complex subunit organization (GO:0071826)	144	10	2.33	+	4.29	0.00019	0.00573
sulfur compound biosynthetic process (GO:0044272)	160	11	2.59	+	4.25	9.98e-05	0.00323
cellular response to hypoxia (GO:0071456)	239	16	3.87	+	4.14	3.85e-06	0.000148
non-membrane-bounded organelle assembly (GO:0140694)	150	10	2.43	+	4.12	0.000259	0.00743
cellular response to decreased oxygen levels (GO:0036294)	241	16	3.9	+	4.1	4.26e-06	0.000163
cellular response to oxygen levels (GO:0071453)	242	16	3.92	+	4.08	4.48e-06	0.00017
ribonucleoprotein complex biogenesis (GO:0022613)	445	29	7.2	+	4.03	8.33e-10	5.39e-08
monocarboxylic acid metabolic process (GO:0032787)	655	42	10.6	+	3.96	1.9e-13	1.53e-11
carboxylic acid metabolic process (GO:0019752)	1537	98	24.88	+	3.94	1.02e-30	2.73e-28
organic cyclic compound catabolic process (GO:1901361)	240	15	3.88	+	3.86	1.66e-05	0.000607
macromolecule biosynthetic process (GO:0009059)	1285	78	20.8	+	3.75	4.9e-23	1.03e-20
organic substance catabolic process (GO:1901575)	1852	110	29.98	+	3.67	3.9e-32	1.35e-29
carbohydrate metabolic process (GO:0005975)	1065	63	17.24	+	3.65	4.03e-18	6.25e-16
cellular nitrogen compound catabolic process (GO:0044270)	206	12	3.33	+	3.6	0.000213	0.00633
aromatic compound catabolic process (GO:0019439)	226	13	3.66	+	3.55	0.000132	0.00414
detoxification (GO:0098754)	157	9	2.54	+	3.54	0.00143	0.0338
organonitrogen compound catabolic process (GO:1901565)	1089	62	17.63	+	3.52	4.33e-17	5.79e-15
organelle assembly (GO:0070925)	178	10	2.88	+	3.47	0.000916	0.0226
rRNA metabolic process (GO:0016072)	288	16	4.66	+	3.43	3.42e-05	0.00121
monocarboxylic acid biosynthetic process (GO:0072330)	252	14	4.08	+	3.43	0.000105	0.00333
carboxylic acid biosynthetic process (GO:0046394)	596	33	9.65	+	3.42	2.75e-09	1.7e-07
rRNA processing (GO:0006364)	271	15	4.39	+	3.42	6.22e-05	0.00207
response to toxic substance (GO:0009636)	182	10	2.95	+	3.39	0.00108	0.026
cellular macromolecule catabolic process (GO:0044265)	711	39	11.51	+	3.39	1.2e-10	8.06e-09
oxoacid metabolic process (GO:0043436)	1953	106	31.61	+	3.35	8.4e-28	1.98e-25
heterocycle catabolic process (GO:0046700)	204	11	3.3	+	3.33	0.000713	0.0185
modification-dependent macromolecule catabolic process (GO:0043632)	577	31	9.34	+	3.32	1.63e-08	8.96e-07
modification-dependent protein catabolic process (GO:0019941)	565	30	9.15	+	3.28	3.57e-08	1.85e-06
catabolic process (GO:0009056)	2174	115	35.19	+	3.27	2.14e-29	5.25e-27
response to cold (GO:0009409)	473	25	7.66	+	3.27	5.43e-07	2.3e-05
ubiquitin-dependent protein catabolic process (GO:0006511)	551	29	8.92	+	3.25	7.25e-08	3.59e-06
response to hypoxia (GO:0001666)	323	17	5.23	+	3.25	3.74e-05	0.00132
carbohydrate derivative metabolic process (GO:1901135)	1030	54	16.67	+	3.24	1.35e-13	1.1e-11
cellular catabolic process (GO:0044248)	1682	88	27.23	+	3.23	6.99e-22	1.42e-19
response to oxidative stress (GO:0006979)	613	32	9.92	+	3.23	1.81e-08	9.58e-07
cellular macromolecule metabolic process (GO:0044260)	2424	126	39.24	+	3.21	8.92e-32	2.76e-29
response to decreased oxygen levels (GO:0036293)	331	17	5.36	+	3.17	5e-05	0.00172
response to oxygen levels (GO:0070482)	333	17	5.39	+	3.15	5.36e-05	0.00183
organic acid metabolic process (GO:0006082)	2088	106	33.8	+	3.14	1.44e-25	3.14e-23
proteolysis involved in protein catabolic process (GO:0051603)	638	32	10.33	+	3.1	4.36e-08	2.23e-06
cell wall macromolecule metabolic process (GO:0044036)	222	11	3.59	+	3.06	0.00137	0.0326
proteasome-mediated ubiquitin-dependent protein catabolic process (GO:0043161)	265	13	4.29	+	3.03	0.000568	0.015
macromolecule catabolic process (GO:0009057)	1032	50	16.7	+	2.99	1.79e-11	1.25e-09
gene expression (GO:0010467)	1714	83	27.74	+	2.99	1.18e-18	1.98e-16
small molecule metabolic process (GO:0044281)	2857	138	46.25	+	2.98	5.93e-32	1.94e-29
small molecule biosynthetic process (GO:0044283)	898	43	14.54	+	2.96	7.23e-10	4.73e-08
cellular biosynthetic process (GO:0044249)	2872	137	46.49	+	2.95	3.72e-31	1.04e-28
organophosphate biosynthetic process (GO:0090407)	359	17	5.81	+	2.93	0.000128	0.00405
organic acid biosynthetic process (GO:0016053)	704	33	11.4	+	2.9	1.2e-07	5.71e-06
protein catabolic process (GO:0030163)	711	33	11.51	+	2.87	1.49e-07	6.98e-06
organic substance biosynthetic process (GO:1901576)	3119	144	50.49	+	2.85	1.67e-31	4.92e-29
cellular nitrogen compound metabolic process (GO:0034641)	3240	149	52.44	+	2.84	1.39e-32	5.11e-30
biosynthetic process (GO:0009058)	3327	153	53.85	+	2.84	1.33e-33	5.22e-31
proteolysis (GO:0006508)	881	40	14.26	+	2.8	1.21e-08	6.84e-07
response to temperature stimulus (GO:0009266)	866	38	14.02	+	2.71	6.64e-08	3.31e-06
response to heat (GO:0009408)	299	13	4.84	+	2.69	0.00162	0.0374
polysaccharide metabolic process (GO:0005976)	495	21	8.01	+	2.62	9.61e-05	0.00318
cellular polysaccharide metabolic process (GO:0044264)	331	14	5.36	+	2.61	0.0014	0.0332
organonitrogen compound metabolic process (GO:1901564)	5422	229	87.76	+	2.61	2.75e-49	4.05e-46
sulfur compound metabolic process (GO:0006790)	549	23	8.89	+	2.59	5.43e-05	0.00184
cellular carbohydrate metabolic process (GO:0044262)	477	19	7.72	+	2.46	0.000433	0.0118
response to inorganic substance (GO:0010035)	2111	84	34.17	+	2.46	4.47e-14	3.76e-12
carbohydrate derivative biosynthetic process (GO:1901137)	457	18	7.4	+	2.43	0.000689	0.0179
ncRNA metabolic process (GO:0034660)	538	21	8.71	+	2.41	0.000401	0.011
nucleobase-containing compound biosynthetic process (GO:0034654)	504	18	8.16	+	2.21	0.00218	0.05
primary metabolic process (GO:0044238)	8191	288	132.58	+	2.17	2.8e-51	8.23e-48
nitrogen compound metabolic process (GO:0006807)	7100	244	114.93	+	2.12	1.03e-37	4.66e-35
protein metabolic process (GO:0019538)	3800	130	61.51	+	2.11	8.93e-17	1.14e-14
cellular metabolic process (GO:0044237)	8829	294	142.91	+	2.06	8.12e-48	9.56e-45
aromatic compound biosynthetic process (GO:0019438)	842	28	13.63	+	2.05	0.000467	0.0126
cell wall organization or biogenesis (GO:0071554)	967	32	15.65	+	2.04	0.000238	0.00697
organic cyclic compound biosynthetic process (GO:1901362)	947	31	15.33	+	2.02	0.000347	0.00968
nucleobase-containing compound metabolic process (GO:0006139)	2274	74	36.81	+	2.01	1.33e-08	7.43e-07
heterocycle biosynthetic process (GO:0018130)	769	25	12.45	+	2.01	0.0013	0.0312
organic substance metabolic process (GO:0071704)	9807	315	158.74	+	1.98	2.63e-50	5.16e-47
cellular response to stress (GO:0033554)	1215	38	19.67	+	1.93	0.000175	0.00534
cellular component biogenesis (GO:0044085)	1869	58	30.25	+	1.92	2.9e-06	0.000113
metabolic process (GO:0008152)	10826	334	175.24	+	1.91	7.66e-52	4.51e-48
cellular aromatic compound metabolic process (GO:0006725)	3016	91	48.82	+	1.86	7.77e-09	4.62e-07
organic cyclic compound metabolic process (GO:1901360)	3128	94	50.63	+	1.86	5.25e-09	3.15e-07
heterocycle metabolic process (GO:0046483)	2883	85	46.67	+	1.82	9.2e-08	4.44e-06
response to chemical (GO:0042221)	5053	141	81.79	+	1.72	2.8e-11	1.91e-09
macromolecule metabolic process (GO:0043170)	5988	167	96.93	+	1.72	7.53e-14	6.24e-12
phosphorus metabolic process (GO:0006793)	1924	52	31.14	+	1.67	0.000361	0.00999
cellular process (GO:0009987)	14852	375	240.4	+	1.56	3.91e-41	2.09e-38
response to stress (GO:0006950)	5286	131	85.56	+	1.53	3.15e-07	1.4e-05
cellular component organization or biogenesis (GO:0071840)	3618	88	58.56	+	1.5	0.000101	0.00325
response to stimulus (GO:0050896)	9304	219	150.6	+	1.45	3.83e-11	2.59e-09
biological regulation (GO:0065007)	8223	86	133.1	-	0.65	5.96e-07	2.47e-05
regulation of biological process (GO:0050789)	7518	73	121.69	-	0.6	8.69e-08	4.23e-06
regulation of cellular process (GO:0050794)	6205	57	100.44	-	0.57	2.84e-07	1.29e-05
transport (GO:0006810)	2258	18	36.55	-	0.49	0.000831	0.021
establishment of localization (GO:0051234)	2308	18	37.36	-	0.48	0.000495	0.0133
regulation of metabolic process (GO:0019222)	3921	29	63.47	-	0.46	4.6e-07	1.98e-05
protein modification process (GO:0036211)	2659	17	43.04	-	0.39	4.64e-06	0.000175
macromolecule modification (GO:0043412)	3030	19	49.05	-	0.39	7.16e-07	2.95e-05
regulation of cellular metabolic process (GO:0031323)	3171	19	51.33	-	0.37	1.11e-07	5.31e-06
regulation of primary metabolic process (GO:0080090)	2916	16	47.2	-	0.34	8.41e-08	4.13e-06
regulation of biosynthetic process (GO:0009889)	2603	14	42.13	-	0.33	4.13e-07	1.79e-05
regulation of cellular biosynthetic process (GO:0031326)	2547	13	41.23	-	0.32	2.11e-07	9.64e-06
regulation of macromolecule metabolic process (GO:0060255)	3245	16	52.53	-	0.3	1.57e-09	9.91e-08
regulation of gene expression (GO:0010468)	2795	13	45.24	-	0.29	1.05e-08	6.01e-07
regulation of nitrogen compound metabolic process (GO:0051171)	2869	13	46.44	-	0.28	3.76e-09	2.31e-07
regulation of macromolecule biosynthetic process (GO:0010556)	2366	9	38.3	-	0.24	1.44e-08	8.02e-07
transmembrane transport (GO:0055085)	844	3	13.66	-	0.22	0.00115	0.0276
regulation of RNA metabolic process (GO:0051252)	2314	5	37.46	-	0.13	2.78e-11	1.93e-09
regulation of nucleobase-containing compound metabolic process (GO:0019219)	2449	5	39.64	-	0.13	4.11e-12	3.02e-10
protein phosphorylation (GO:0006468)	1057	2	17.11	-	0.12	1.3e-05	0.000483
regulation of DNA-templated transcription (GO:0006355)	2184	3	35.35	-	0.08	3.23e-12	2.41e-10
regulation of nucleic acid-templated transcription (GO:1903506)	2185	3	35.37	-	0.08	2.02e-12	1.55e-10
regulation of RNA biosynthetic process (GO:2001141)	2187	3	35.4	-	0.08	2.02e-12	1.56e-10

## Sheet: Tab S. 6
Table S6. List of genes encoding proteins detected in Maldi-TOF analisis of 150 kDa fraction (Table S2) and not identified by PANTHER.ORG.
ID
AT1G20225
AT3G20250
AT4G15940
AT1G50480
AT4G02520.1
AT2G02930.1
AT1G35720.1
AT1G02920.1
AT5G13420.1
AT1G22300.1
AT1G35160.1
AT2G30870.1
AT3G02520.1
AT2G47730.1
AT1G75280.1
AT1G75040.1
AT2G30860.1
AT2G42590.1
AT3G55440.1
AT5G10450.1
AT4G08390.1
AT5G65430.1
AT1G60730.1
AT1G27450.1
AT2G36530.1
AT3G16400.1
AT4G34050.1
AT1G78380.1
AT5G57330.1
AT1G19130.1
AT4G27450.1
AT2G31390.1
AT1G07890.1
AT1G60690.1
AT2G21620.1
AT4G03520.1
AT1G23820.1
AT3G20390.1
AT1G77120.1
AT3G52930.1
AT4G23100.1
AT3G44320.1
AT2G04400.1
AT1G62380.1
AT4G20260.1
AT2G33590.1
AT1G08980.1
AT1G56190.1
AT4G08870.1
AT5G58070.1
AT2G21170.1
AT2G23610.1
AT3G54420.1
AT1G51680.1
AT2G39460.1
AT4G17530.1
AT2G14260.1
AT5G19440.1
AT5G17330.1
AT3G20370.1
AT5G07030.1
AT1G18540.1
AT1G61820.1
AT1G03220.1
AT3G13560.1
AT3G23990.1
AT1G78900.1
AT5G42790.1
AT2G33210.1
AT5G15650.1
AT1G53850.1
AT5G66140.1
AT1G13060.1
AT1G78850.1
AT4G38510.1
AT1G78860.1
AT3G27430.2
AT2G35860.1
AT5G02870.1
AT5G20290.1
AT3G54400.1
AT4G13940.1
AT1G57720.1
AT1G28290.1
AT3G04840.1
AT1G23410.1
AT2G34480.1
AT1G22780.1
AT2G31610.1
AT5G13690.1
AT1G23290.1
AT4G01870.1
AT1G47960.1
AT1G65930.1
AT3G05560.1
AT1G72370.1
AT1G18080.1
AT2G30860.1
AT1G31670.1
AT3G02080.1
AT4G15000.1
AT1G07660.1
AT5G06390.1
AT1G20200.1
AT1G31710.1
AT5G58390.1
AT5G20830.1
AT4G34670.1
AT4G13930.1
AT3G06650.1
AT5G23740.1
AT1G30700.1
AT2G40510.1
AT1G54220.1
AT1G56070.1
AT5G57020.1
AT5G04710.1
AT3G52880.1
AT1G29150.1
AT2G20450.1

## Sheet: Tab S. 7
Table S7. List of all diferentialy expressed genes (DEGs) compared to wild-type in cambium and differentiating xylem tissues isolated from 4-years-old transgenic aspen Line 4 growing in the field conditions.
locusNameF26A1A2:F27A2:F29A1A2:F27A2:F43A2:F57A1A2:F27A2:F71A1A2:F27A2:F85A1A2:FA2:F2591+A2:F27	baseMean	log2FoldChange	padj	best_arabi_gene	best_arabi_defline
POPTR_016G125400v3	313.487	5.95877	3.49743e-181	NA	NA
POPTR_005G155300v3	162.268	5.53339	3.64361e-29	NA	NA
POPTR_T012400v3	316.06	5.24516	6.71725e-206	NA	NA
POPTR_T012500v3	2300.41	5.18808	0	NA	NA
POPTR_010G183900v3	139.541	4.53748	1.68761e-96	`
POPTR_T012700v3	999.822	4.39153	0	NA	NA
POPTR_003G070600v3	1531.58	4.13274	0	NA	NA
POPTR_015G003500v3	1142.78	3.86199	0
POPTR_006G068100v3	339.686	3.507	1.47236e-136	AT1G02630	Nucleoside transporter family protein
POPTR_014G015000v3	595.688	3.34815	4.89621e-178	NA	NA
POPTR_017G046200v3	306.733	3.31213	4.17774e-109	AT3G45140	lipoxygenase 2
POPTR_009G118800v3	5621.14	3.29606	0	AT2G21590	Glucose-1-phosphate adenylyltransferase family protein
POPTR_014G146700v3	189.74	3.25475	3.42615e-71	NA	NA
POPTR_013G065800v3	105.407	3.23263	1.39123e-53	AT5G17860	calcium exchanger 7
POPTR_017G096600v3	137.544	3.19973	7.60343e-13
POPTR_005G047800v3	407.689	3.16883	4.06417e-166	NA	NA
POPTR_008G144500v3	1139.35	3.15784	8.27408e-256	AT1G14520	myo-inositol oxygenase 1
POPTR_003G054100v3	128.629	3.12258	3.63167e-14	AT1G33760	Integrase-type DNA-binding superfamily protein
POPTR_001G352100v3	1098.91	3.06768	8.08099e-212	AT4G18220	Drug/metabolite transporter superfamily protein
POPTR_007G008500v3	1320.52	3.03808	8.1621e-140	AT5G65730	xyloglucan endotransglucosylase/hydrolase 6
POPTR_002G079500v3	543.35	2.99525	2.87111e-12	NA	NA
POPTR_001G352500v3	156.687	2.99099	1.93139e-39	AT5G46370	Ca2+ activated outward rectifying K+ channel 2
POPTR_001G142500v3	118.681	2.96069	6.73837e-47	NA	NA
POPTR_005G174000v3	680.962	2.95356	1.83531e-187	NA	NA
POPTR_017G096800v3	175.505	2.92234	2.1924e-33
POPTR_004G173400v3	3599.26	2.90543	1.61529e-184	AT4G34950	Major facilitator superfamily protein
POPTR_015G071500v3	524.347	2.8989	1.04943e-137
POPTR_007G084800v3	193.607	2.89137	8.91799e-66
POPTR_005G144200v3	161.273	2.88626	2.97747e-35	NA	NA
POPTR_018G015100v3	3260.26	2.87318	0	NA	NA
POPTR_003G142500v3	288.05	2.86723	5.70842e-98	NA	NA
POPTR_008G184000v3	277.564	2.84541	1.23654e-72	AT5G57260	cytochrome P450, family 71, subfamily B, polypeptide 10
POPTR_006G135100v3	997.152	2.82848	1.77496e-239	NA	NA
POPTR_008G170100v3	112.898	2.81037	3.71513e-41	AT5G46040	Major facilitator superfamily protein
POPTR_016G004800v3	492.84	2.7941	1.30205e-152
POPTR_019G067800v3	104.967	2.79085	2.38158e-43	NA	NA
POPTR_019G124750v3	387.154	2.75957	7.0908e-65	NA	NA
POPTR_019G055800v3	180.79	2.71734	6.62157e-60	NA	NA
POPTR_019G070975v3	4729.36	2.70168	1.67209e-185	NA	NA
POPTR_012G084400v3	757.95	2.67342	3.53662e-181	NA	NA
POPTR_009G167800v3	1735.76	2.66184	5.93013e-249	AT2G17230	EXORDIUM like 5
POPTR_014G154200v3	405.364	2.64611	1.33575e-112	NA	NA
POPTR_017G095900v3	110.122	2.6281	3.08662e-27
POPTR_009G044200v3	331.874	2.60448	9.40551e-60	AT1G07280	Tetratricopeptide repeat (TPR)-like superfamily protein
POPTR_011G167000v3	354.888	2.60406	6.21023e-121	NA	NA
POPTR_008G064200v3	355.501	2.60369	4.78828e-101	AT3G11280	Duplicated homeodomain-like superfamily protein
POPTR_018G138100v3	159.247	2.58554	9.95579e-33	NA	NA
POPTR_003G212000v3	171.68	2.58552	3.15141e-13	AT5G60900	receptor-like protein kinase 1
POPTR_001G288900v3	171.864	2.543	4.92328e-45	AT1G50040	Protein of unknown function (DUF1005)
POPTR_004G015700v3	873.377	2.52178	1.87939e-112	AT1G61930	Protein of unknown function, DUF584
POPTR_001G164800v3	220.61	2.50928	4.54195e-67	NA	NA
POPTR_002G070101v3	281.366	2.50504	3.70038e-10	NA	NA
POPTR_013G019800v3	327.542	2.46585	2.24137e-62	NA	NA
POPTR_008G184900v3	466.086	2.4611	1.18295e-106	AT5G57260	cytochrome P450, family 71, subfamily B, polypeptide 10
POPTR_017G096000v3	130.335	2.44909	5.78986e-07
POPTR_002G040200v3	133.109	2.44522	2.72666e-42	NA	NA
POPTR_010G050900v3	458.898	2.44037	4.02547e-71	NA	NA
POPTR_002G198800v3	815.367	2.4365	4.34781e-56	NA	NA
POPTR_008G070800v3	662.76	2.42211	6.86229e-163	AT2G40200	basic helix-loop-helix (bHLH) DNA-binding superfamily protein
POPTR_006G054800v3	481.242	2.40214	1.41971e-121	AT3G57630	exostosin family protein
POPTR_019G014376v3	113.698	2.39846	2.89663e-18	NA	NA
POPTR_004G092500v3	173.901	2.39727	1.38651e-45	AT5G23530	carboxyesterase 18
POPTR_001G342000v3	632.289	2.39616	1.13003e-47	AT3G45780	phototropin 1
POPTR_002G085600v3	327.544	2.39266	3.56875e-36	NA	NA
POPTR_012G014500v3	3518.37	2.38541	9.52163e-176	NA	NA
POPTR_009G075400v3	113.019	2.36782	3.61607e-24
POPTR_010G012000v3	180.202	2.35817	2.26749e-37	AT3G06868
POPTR_002G225500v3	795.875	2.34873	1.44434e-118	NA	NA
POPTR_004G232400v3	748.661	2.34803	1.43469e-18	NA	NA
POPTR_002G130700v3	971.718	2.33449	9.35644e-205	NA	NA
POPTR_009G070400v3	406.411	2.3241	2.74603e-55	AT5G12300	Calcium-dependent lipid-binding (CaLB domain) family protein
POPTR_019G053100v3	376.251	2.30982	6.81822e-89	NA	NA
POPTR_012G130300v3	263.546	2.30683	1.96354e-78	NA	NA
POPTR_005G086500v3	433.333	2.30122	3.83417e-80	NA	NA
POPTR_006G114200v3	228.599	2.2871	2.89267e-30	AT3G54220	GRAS family transcription factor
POPTR_019G124400v3	574.509	2.28559	2.1123e-51	NA	NA
POPTR_001G342600v3	1894.9	2.23639	7.78904e-262	AT5G14450	GDSL-like Lipase/Acylhydrolase superfamily protein
POPTR_014G026700v3	238.929	2.2243	4.26342e-42	NA	NA
POPTR_007G053600v3	888.004	2.21749	2.06711e-133	AT5G67420	LOB domain-containing protein 37
POPTR_001G041700v3	1361.46	2.2161	2.2851e-151	NA	NA
POPTR_002G079700v3	559.283	2.20815	1.54442e-36	NA	NA
POPTR_008G027600v3	1236.03	2.20735	2.75525e-73
POPTR_002G113300v3	6598.24	2.16344	0	NA	NA
POPTR_015G040100v3	335.127	2.15664	7.32432e-68	AT1G18160	Protein kinase superfamily protein
POPTR_008G136401v3	107.887	2.13372	1.68144e-21	AT1G14780	MAC/Perforin domain-containing protein
POPTR_006G236200v3	864.379	2.12319	2.30229e-138	NA	NA
POPTR_017G051100v3	3591.64	2.12242	4.82078e-107
POPTR_T046200v3	139.953	2.11577	1.11666e-33	NA	NA
POPTR_004G068500v3	182.997	2.11524	5.45289e-43	AT3G01350	Major facilitator superfamily protein
POPTR_011G167700v3	1284.57	2.1141	6.03933e-05	NA	NA
POPTR_007G031800v3	421.366	2.11002	7.00122e-66	AT4G36850	PQ-loop repeat family protein / transmembrane family protein
POPTR_015G027700v3	125.726	2.10775	9.11887e-31
POPTR_007G053400v3	188.249	2.09718	1.93626e-42	AT3G49960	Peroxidase superfamily protein
POPTR_013G121000v3	101.75	2.0917	3.29649e-25	NA	NA
POPTR_004G235400v3	1591.08	2.09166	3.74741e-92	NA	NA
POPTR_014G048100v3	353.854	2.0783	4.93805e-32
POPTR_004G231700v3	200.824	2.06543	1.27551e-19	NA	NA
POPTR_002G243400v3	149.423	2.06496	0.00392941	NA	NA
POPTR_016G128400v3	166.031	2.05165	1.33383e-33	NA	NA
POPTR_011G122000v3	330.291	2.04311	5.12264e-76	NA	NA
POPTR_001G015500v3	383.473	2.03657	5.39576e-74	AT3G45140	lipoxygenase 2
POPTR_010G160800v3	222.327	2.0315	9.08077e-51
POPTR_009G108600v3	162.322	2.02997	4.57151e-45
POPTR_T084500v3	153.288	2.02421	7.32418e-19	NA	NA
POPTR_005G145300v3	624.009	2.02165	7.21253e-63	NA	NA
POPTR_011G146500v3	609.309	2.01712	1.76302e-54	NA	NA
POPTR_019G039000v3	472.407	2.01044	2.11471e-60	NA	NA
POPTR_005G140700v3	111.516	2.00277	1.10765e-21	NA	NA
POPTR_003G168700v3	572.837	2.00265	7.39617e-13	NA	NA
POPTR_002G150400v3	108.663	1.99622	2.48202e-14	AT1G33730	cytochrome P450, family 76, subfamily C, polypeptide 5
POPTR_008G002900v3	375.374	1.99446	7.86746e-09	NA	NA
POPTR_002G002000v3	353.136	1.99122	1.48447e-45	NA	NA
POPTR_012G073700v3	244.3	1.99028	2.36003e-45	NA	NA
POPTR_001G385200v3	423.112	1.97592	4.21854e-33	NA	NA
POPTR_012G085450v3	430.525	1.97497	2.11013e-50	NA	NA
POPTR_017G016600v3	166.329	1.97113	2.91039e-33
POPTR_001G299000v3	207.423	1.97099	3.06405e-39	AT4G34260	1,2-alpha-L-fucosidases
POPTR_005G024250v3	1429.13	1.96927	3.43604e-59	NA	NA
POPTR_016G143833v3	181.035	1.96271	2.51169e-22	NA	NA
POPTR_011G059300v3	486.924	1.96115	1.81173e-39	NA	NA
POPTR_010G094300v3	1418.67	1.95306	5.61684e-89	AT1G70300	K+ uptake permease 6
POPTR_017G096400v3	278.86	1.95272	4.26818e-37
POPTR_003G006300v3	1080.13	1.94952	3.83669e-10	NA	NA
POPTR_009G065100v3	139.554	1.94225	4.61986e-32
POPTR_016G032000v3	254.851	1.94117	8.0565e-42	NA	NA
POPTR_002G213200v3	132.286	1.93862	4.91981e-28	NA	NA
POPTR_004G197900v3	640.631	1.93591	5.71385e-29
POPTR_017G115900v3	160.727	1.93169	1.02576e-30	AT5G20480	EF-TU receptor
POPTR_016G080400v3	216.514	1.92174	2.02839e-34	NA	NA
POPTR_008G184400v3	497.932	1.91817	4.29548e-65	AT5G57260	cytochrome P450, family 71, subfamily B, polypeptide 10
POPTR_007G078100v3	644.567	1.91808	4.60033e-65	AT4G39400	Leucine-rich receptor-like protein kinase family protein
POPTR_007G074028v3	121.498	1.91184	7.66855e-18	AT5G23280	TCP family transcription factor
POPTR_014G072300v3	8424.06	1.91082	0
POPTR_006G058700v3	158.542	1.906	1.41041e-26	AT5G06850	C2 calcium/lipid-binding plant phosphoribosyltransferase family protein
POPTR_006G104800v3	116.242	1.90496	2.15709e-25	AT3G51660	Tautomerase/MIF superfamily protein
POPTR_013G102700v3	349.29	1.89613	3.99708e-66	NA	NA
POPTR_018G057000v3	472.365	1.89605	1.60477e-51	AT1G51950	indole-3-acetic acid inducible 18
POPTR_002G168200v3	295.443	1.8947	6.94271e-53	AT2G46370	Auxin-responsive GH3 family protein
POPTR_010G129400v3	533.754	1.88482	3.49905e-71	AT1G13250	galacturonosyltransferase-like 3
POPTR_015G014000v3	365.765	1.86791	3.35898e-68	AT4G27900	CCT motif family protein
POPTR_T126806v3	443.275	1.86495	1.81008e-11	AT3G14470	NB-ARC domain-containing disease resistance protein
POPTR_005G108900v3	1037.59	1.86314	4.36624e-105	NA	NA
POPTR_001G018200v3	3427.12	1.86279	9.6355e-64	AT5G12960	Putative glycosyl hydrolase of unknown function (DUF1680)
POPTR_004G199900v3	886.777	1.84897	2.74504e-50
POPTR_014G047400v3	1548.15	1.84847	1.21203e-90	AT3G60320	Protein of unknown function (DUF630 and DUF632)
POPTR_008G112800v3	239.889	1.84553	2.31357e-34	AT1G68990	male gametophyte defective 3
POPTR_010G207700v3	558.197	1.84414	2.87603e-81	AT2G39570	ACT domain-containing protein
POPTR_008G126500v3	144.959	1.84254	9.26991e-23	AT1G15160	MATE efflux family protein
POPTR_005G232400v3	1832.39	1.83918	6.01354e-97	NA	NA
POPTR_002G198600v3	447.101	1.83549	3.35068e-57	NA	NA
POPTR_005G228700v3	202.08	1.82861	1.5753e-26	NA	NA
POPTR_014G073100v3	116.268	1.81988	7.9032e-24
POPTR_017G050100v3	142.737	1.8102	1.96859e-14
POPTR_018G130300v3	581.216	1.80591	1.78255e-55	NA	NA
POPTR_009G108500v3	393.593	1.80473	9.09055e-55	AT3G18990	AP2/B3-like transcriptional factor family protein
POPTR_005G231250v3	394.939	1.80464	9.02803e-41	NA	NA
POPTR_005G253800v3	707.692	1.80339	1.23344e-64	NA	NA
POPTR_008G087700v3	721.259	1.8005	1.09564e-50
POPTR_002G147000v3	199.077	1.79862	3.84299e-22	AT2G45340	Leucine-rich repeat protein kinase family protein
POPTR_010G170900v3	355.603	1.79785	2.90544e-44	AT1G50280	Phototropic-responsive NPH3 family protein
POPTR_011G046900v3	425.504	1.79741	1.40481e-46	NA	NA
POPTR_016G127700v3	1477.93	1.7913	1.69233e-133	NA	NA
POPTR_001G118500v3	213.081	1.7821	1.15837e-38	NA	NA
POPTR_001G163600v3	913.718	1.78096	2.28953e-98	NA	NA
POPTR_005G073100v3	149.037	1.77779	4.18127e-25	NA	NA
POPTR_001G189500v3	206.207	1.77396	0.000266538	NA	NA
POPTR_002G112600v3	237.933	1.77144	4.43888e-30	NA	NA
POPTR_005G225600v3	712.392	1.76951	9.51771e-53	NA	NA
POPTR_018G142100v3	174.667	1.76832	1.32551e-27	NA	NA
POPTR_016G080700v3	870.506	1.76617	5.04467e-35	NA	NA
POPTR_015G013700v3	5701.79	1.76573	7.61913e-106	AT3G49220	Plant invertase/pectin methylesterase inhibitor superfamily
POPTR_001G135400v3	168.679	1.76426	3.76633e-31	NA	NA
POPTR_015G147600v3	252.14	1.76017	1.36643e-23	AT4G25640	detoxifying efflux carrier 35
POPTR_003G061800v3	1238.49	1.75825	2.3484e-73	NA	NA
POPTR_006G275800v3	245.478	1.74878	1.06388e-07
POPTR_018G017900v3	104.654	1.74748	1.09841e-21	NA	NA
POPTR_013G040700v3	277.408	1.74439	1.61331e-54	NA	NA
POPTR_014G035000v3	518.725	1.74211	2.4049e-63	AT5G42680	Protein of unknown function, DUF617
POPTR_004G093200v3	143.846	1.74173	5.5681e-20
POPTR_008G160200v3	250.908	1.73878	2.84115e-36	AT3G23000	CBL-interacting protein kinase 7
POPTR_015G077600v3	715.61	1.73762	1.09581e-47
POPTR_005G144100v3	103.637	1.73581	1.36886e-15	NA	NA
POPTR_013G009400v3	175.283	1.73535	1.23221e-28	NA	NA
POPTR_017G028450v3	145.497	1.73411	1.15582e-23
POPTR_002G212900v3	904.537	1.73098	6.80936e-99	NA	NA
POPTR_004G080900v3	246.81	1.72666	9.91661e-22	AT1G65920	Regulator of chromosome condensation (RCC1) family with FYVE zinc finger domain
POPTR_001G437200v3	177.086	1.72531	6.43705e-06	AT1G78340	glutathione S-transferase TAU 22
POPTR_017G028150v3	317.139	1.7201	5.03014e-25
POPTR_005G167300v3	735.935	1.71533	6.55442e-59	NA	NA
POPTR_013G064300v3	1286.27	1.71453	2.32414e-58	AT3G03770	Leucine-rich repeat protein kinase family protein
POPTR_004G026350v3	190.401	1.7097	8.62268e-31	AT4G21400	cysteine-rich RLK (RECEPTOR-like protein kinase) 28
POPTR_018G027700v3	2264.19	1.70323	1.04723e-31	AT2G25490	EIN3-binding F box protein 1
POPTR_006G050400v3	114.995	1.70089	1.19848e-18	AT2G41800	Protein of unknown function, DUF642
POPTR_011G087200v3	2356.54	1.69568	3.57885e-66	NA	NA
POPTR_019G026740v3	106.092	1.6952	6.86273e-21	NA	NA
POPTR_012G027800v3	111.252	1.69432	1.3277e-10	NA	NA
POPTR_001G454500v3	268.591	1.69125	6.62464e-23	AT1G33240	GT-2-like 1
POPTR_002G080066v3	403.465	1.68825	2.15809e-51	NA	NA
POPTR_018G127700v3	105.556	1.68146	2.3131e-18	NA	NA
POPTR_014G164700v3	465.716	1.6792	1.61029e-49	NA	NA
POPTR_009G084000v3	399.468	1.67757	2.64647e-28	AT1G50040	Protein of unknown function (DUF1005)
POPTR_008G105200v3	875.772	1.67279	1.92175e-58	AT4G16250	phytochrome D
POPTR_019G027440v3	230.998	1.67061	3.71589e-21	NA	NA
POPTR_001G366100v3	371.609	1.66442	1.20228e-24	AT1G55910	zinc transporter 11 precursor
POPTR_012G005100v3	101.143	1.66426	4.04714e-18	NA	NA
POPTR_018G090300v3	310.021	1.66329	5.13877e-38	AT4G30190	H(+)-ATPase 2
POPTR_019G061700v3	202.852	1.66278	7.76235e-29	NA	NA
POPTR_019G014378v3	465.014	1.6576	1.81375e-31	NA	NA
POPTR_011G103900v3	868.723	1.65721	7.8559e-34	NA	NA
POPTR_013G006100v3	109.6	1.65682	2.35879e-10	NA	NA
POPTR_002G230000v3	339.07	1.65524	3.2858e-17	NA	NA
POPTR_014G140500v3	233.711	1.65418	3.14833e-07	NA	NA
POPTR_001G093900v3	167.204	1.65367	1.01306e-12	NA	NA
POPTR_009G054900v3	108.863	1.65011	2.83189e-15	AT3G51970	acyl-CoA sterol acyl transferase 1
POPTR_019G078400v3	1943.16	1.64658	2.84499e-76	NA	NA
POPTR_005G143700v3	127.982	1.64601	1.09449e-23	NA	NA
POPTR_010G005800v3	137.335	1.64407	9.8855e-12	AT4G16070	Mono-/di-acylglycerol lipase, N-terminal;Lipase, class 3
POPTR_004G158150v3	162.109	1.6433	4.29297e-16	AT4G34588	conserved peptide upstream open reading frame 2
POPTR_001G449500v3	6135.78	1.63662	1.15396e-96	AT1G32900	UDP-Glycosyltransferase superfamily protein
POPTR_005G102300v3	920.019	1.63641	2.06601e-63	NA	NA
POPTR_004G167500v3	1003.63	1.63553	2.17063e-97	AT4G34860	Plant neutral invertase family protein
POPTR_010G001000v3	814.267	1.63314	1.84961e-47	AT3G16857	response regulator 1
POPTR_002G023900v3	341.962	1.61645	1.34191e-35	NA	NA
POPTR_013G145300v3	215.332	1.61568	5.93323e-30	NA	NA
POPTR_004G015500v3	244.753	1.61427	9.80239e-24	AT4G04740	calcium-dependent protein kinase 23
POPTR_007G003200v3	440.864	1.61189	5.55971e-56	AT3G13040	myb-like HTH transcriptional regulator family protein
POPTR_012G006400v3	1303.18	1.61089	4.23896e-38	NA	NA
POPTR_017G109300v3	370.118	1.60793	2.20581e-58	AT3G30775	Methylenetetrahydrofolate reductase family protein
POPTR_002G143300v3	268.351	1.60719	3.36704e-16	NA	NA
POPTR_001G100800v3	256.879	1.60621	5.90918e-08	NA	NA
POPTR_017G130600v3	410.129	1.60477	1.96376e-54	NA	NA
POPTR_004G222100v3	168.56	1.6042	6.54799e-27	NA	NA
POPTR_009G011800v3	1344.89	1.60097	3.64013e-45	AT5G60450	auxin response factor 4
POPTR_007G076200v3	601.141	1.5992	1.95229e-33	AT5G08520	Duplicated homeodomain-like superfamily protein
POPTR_011G152400v3	895.584	1.59613	1.37227e-78	NA	NA
POPTR_015G144400v3	1039.57	1.59472	1.82182e-48	AT3G48980	Arabidopsis thaliana protein of unknown function (DUF821)
POPTR_014G021800v3	236.733	1.5942	1.06562e-27	NA	NA
POPTR_002G120400v3	3156.28	1.59161	3.56015e-68
POPTR_009G006500v3	477.833	1.58847	6.09616e-57	NA	NA
POPTR_014G078500v3	408.241	1.58516	1.86194e-41	AT2G45680	TCP family transcription factor
POPTR_012G014000v3	3168.85	1.57343	1.23031e-141	NA	NA
POPTR_010G181800v3	404.573	1.57292	3.57192e-48	AT2G40420	Transmembrane amino acid transporter family protein
POPTR_018G130100v3	533.653	1.57291	4.10499e-63	NA	NA
POPTR_002G020500v3	637.688	1.56829	1.38235e-82	NA	NA
POPTR_010G074700v3	607.041	1.56808	1.79058e-30
POPTR_009G135300v3	1590.77	1.56781	6.70775e-62	AT4G38580	farnesylated protein 6
POPTR_003G087600v3	3154.4	1.56489	8.18019e-150	NA	NA
POPTR_010G018600v3	136.769	1.56443	1.5407e-05
POPTR_016G087000v3	258.165	1.56407	8.60335e-22	NA	NA
POPTR_009G046700v3	2639.39	1.56337	2.51018e-118	AT2G29970	Double Clp-N motif-containing P-loop nucleoside triphosphate hydrolases superfamily protein
POPTR_009G119132v3	122.039	1.56169	4.21005e-09
POPTR_010G083300v3	514.524	1.56133	2.68848e-37	AT4G14760	kinase interacting (KIP1-like) family protein
POPTR_001G059100v3	662.425	1.55524	2.43371e-37	NA	NA
POPTR_007G130100v3	406.462	1.55448	1.618e-46	AT2G31380	salt tolerance homologue
POPTR_002G012900v3	201.777	1.55033	1.08262e-28	NA	NA
POPTR_006G067200v3	193.117	1.54832	0.00190772
POPTR_004G214833v3	234.023	1.54756	3.31724e-13	NA	NA
POPTR_009G020400v3	205.312	1.54569	7.2865e-22
POPTR_016G000600v3	3139.93	1.54173	1.33584e-57
POPTR_017G143820v3	147.542	1.53888	5.91725e-18	NA	NA
POPTR_012G084800v3	237.455	1.5388	1.41447e-26	NA	NA
POPTR_001G249200v3	150.116	1.53819	1.08078e-10	AT2G29630	thiaminC
POPTR_010G050501v3	159.723	1.53797	4.13855e-18	NA	NA
POPTR_007G074056v3	125.474	1.53683	8.34337e-19	AT5G04190	phytochrome kinase substrate 4
POPTR_005G109100v3	153.093	1.53603	1.59903e-22	NA	NA
POPTR_006G110000v3	1064.64	1.53575	6.49414e-11	AT3G51550	Malectin/receptor-like protein kinase family protein
POPTR_007G053200v3	319.932	1.53243	3.43067e-33	AT5G67385	Phototropic-responsive NPH3 family protein
POPTR_017G074000v3	1982.23	1.53195	2.11266e-74	AT3G28380	P-glycoprotein 17
POPTR_009G065300v3	898.839	1.52974	6.56373e-31	AT3G52140	tetratricopeptide repeat (TPR)-containing protein
POPTR_004G162400v3	937.222	1.52858	1.72656e-48	AT2G21330	fructose-bisphosphate aldolase 1
POPTR_003G210200v3	489.706	1.52822	5.224e-46	AT5G12900
POPTR_013G061800v3	1199.14	1.52532	4.07872e-45	AT3G03780	methionine synthase 2
POPTR_007G040000v3	221.139	1.52505	7.77228e-30	AT4G28200	(1 of 1) PTHR23271 - HEPATOCELLULAR CARCINOMA-ASSOCIATED ANTIGEN 66
POPTR_002G056100v3	213.523	1.5219	1.36805e-21	NA	NA
POPTR_002G255800v3	1606.22	1.52159	1.55855e-26	NA	NA
POPTR_009G085100v3	11698.7	1.52041	1.25131e-94	AT1G50010	tubulin alpha-2 chain
POPTR_014G187000v3	104.976	1.51844	1.95289e-15	NA	NA
POPTR_001G057400v3	976.098	1.51786	1.20769e-33	NA	NA
POPTR_001G118300v3	760.066	1.51435	5.72064e-47	NA	NA
POPTR_002G206700v3	920.12	1.51211	6.0754e-46	NA	NA
POPTR_014G177800v3	261.067	1.51101	1.39655e-23	NA	NA
POPTR_009G097100v3	268.329	1.51008	2.10532e-33	AT2G15320	Leucine-rich repeat (LRR) family protein
POPTR_005G143200v3	293.449	1.50947	4.01791e-27	NA	NA
POPTR_010G112800v3	950.138	1.50891	1.50752e-19	AT1G23080	Auxin efflux carrier family protein
POPTR_001G272800v3	706.027	1.50624	2.48405e-48
POPTR_019G020102v3	316.912	1.50454	1.112e-31	NA	NA
POPTR_008G064400v3	1500.69	1.50205	1.08088e-102	AT2G39940	RNI-like superfamily protein
POPTR_014G028900v3	385.876	1.49548	8.4089e-51	NA	NA
POPTR_011G167532v3	215.11	1.49429	9.85378e-17	NA	NA
POPTR_008G194700v3	129.122	1.49242	2.43319e-11	NA	NA
POPTR_005G030365v3	355.616	1.49226	0.00438296	NA	NA
POPTR_004G167600v3	234.267	1.49219	7.11502e-20	AT4G30150	(1 of 1) PF10441 - Urb2/Npa2 family (Urb2)
POPTR_006G272066v3	258.651	1.49044	1.16763e-15
POPTR_006G108300v3	246.662	1.48975	7.90224e-06	AT4G32010	HSI2-like 1
POPTR_011G057800v3	839.712	1.48953	4.9979e-28	NA	NA
POPTR_005G014700v3	204.782	1.48935	1.76541e-16	NA	NA
POPTR_013G043700v3	380.563	1.4888	2.24662e-35	NA	NA
POPTR_012G094800v3	388.163	1.48775	1.92356e-33	NA	NA
POPTR_005G181600v3	200.812	1.4854	1.28007e-23	NA	NA
POPTR_008G049500v3	338.081	1.48478	3.41083e-39	AT3G12520	sulfate transporter 4;2
POPTR_009G168300v3	1208.09	1.4845	7.2418e-64	AT2G17260	glutamate receptor 2
POPTR_009G041100v3	920.031	1.48256	9.49066e-30
POPTR_009G120700v3	150.95	1.48056	9.16162e-14	AT2G16390	SNF2 domain-containing protein / helicase domain-containing protein
POPTR_008G174400v3	869.725	1.48045	5.55183e-76	AT4G13540	(1 of 2) PTHR37226:SF1 - GENOMIC DNA, CHROMOSOME 3, BAC CLONE:F14O13
POPTR_002G227500v3	192.055	1.47493	6.17802e-15	NA	NA
POPTR_008G063800v3	382.092	1.4707	6.37598e-08	AT3G55800	sedoheptulose-bisphosphatase
POPTR_005G239300v3	548.005	1.46917	1.52531e-06	NA	NA
POPTR_008G129300v3	702.827	1.4688	2.29748e-52	AT1G70950	TPX2 (targeting protein for Xklp2) protein family
POPTR_016G070500v3	304.999	1.46874	2.14916e-38	NA	NA
POPTR_002G070900v3	226.747	1.46704	6.42031e-20	NA	NA
POPTR_007G097100v3	3761.86	1.46681	7.28871e-145	AT4G40060	homeobox protein 16
POPTR_001G331700v3	141.322	1.46457	8.6707e-25	AT5G40890	chloride channel A
POPTR_005G229700v3	453.015	1.46262	1.08834e-18	NA	NA
POPTR_006G008500v3	7156.66	1.4622	6.56461e-47
POPTR_011G059101v3	127.518	1.46218	3.31545e-20	NA	NA
POPTR_006G141100v3	158.349	1.46151	1.42112e-19	NA	NA
POPTR_014G053900v3	1697.73	1.46051	4.13464e-24
POPTR_007G085600v3	1321.29	1.45977	1.27979e-61	AT4G39660	alanine:glyoxylate aminotransferase 2
POPTR_014G029100v3	186.399	1.45894	1.28903e-21	NA	NA
POPTR_013G133700v3	319.076	1.4585	4.90367e-22	NA	NA
POPTR_002G215800v3	837.197	1.45745	7.32432e-68	NA	NA
POPTR_003G139200v3	320.246	1.45648	2.76342e-33	NA	NA
POPTR_019G027000v3	194.113	1.45582	1.60064e-14	NA	NA
POPTR_008G049300v3	162.746	1.45554	8.67239e-16	AT1G75270	dehydroascorbate reductase 2
POPTR_019G035600v3	2817.64	1.45313	5.00256e-26	NA	NA
POPTR_009G125600v3	275.703	1.453	1.3721e-34	AT4G34740	GLN phosphoribosyl pyrophosphate amidotransferase 2
POPTR_019G026820v3	148.233	1.4504	1.12827e-15	NA	NA
POPTR_001G190100v3	277.657	1.44952	6.39526e-27	NA	NA
POPTR_003G060500v3	160.62	1.44928	2.13456e-19	NA	NA
POPTR_008G018600v3	202.715	1.44741	1.53525e-27	AT3G52060	Core-2/I-branching beta-1,6-N-acetylglucosaminyltransferase family protein
POPTR_016G137600v3	524.352	1.44701	2.79068e-43	NA	NA
POPTR_014G021700v3	255.308	1.44639	2.62207e-27	NA	NA
POPTR_001G072300v3	573.888	1.44501	4.33096e-48	NA	NA
POPTR_008G082800v3	704.863	1.44113	3.3292e-54	AT1G79470	Aldolase-type TIM barrel family protein
POPTR_017G096500v3	640.181	1.43991	7.78267e-10	AT3G29780	ralf-like 27
POPTR_015G116100v3	121.318	1.43724	2.48034e-09
POPTR_001G421300v3	287.957	1.43714	1.41915e-31	AT3G20540	polymerase gamma 1
POPTR_001G158600v3	106.034	1.43681	2.37703e-10	NA	NA
POPTR_001G141600v3	296.555	1.43498	1.90973e-13	NA	NA
POPTR_013G112500v3	879.854	1.4331	4.26812e-94	NA	NA
POPTR_004G194800v3	236.941	1.42942	1.30469e-24
POPTR_003G094000v3	249.276	1.4289	1.10018e-23	NA	NA
POPTR_010G046300v3	233.275	1.42727	1.12896e-21	NA	NA
POPTR_002G229900v3	906.864	1.42307	2.00352e-31	NA	NA
POPTR_002G112100v3	915.935	1.42128	6.12499e-10	NA	NA
POPTR_006G106600v3	467.141	1.42063	3.58324e-07	AT5G01770	HEAT repeat ;WD domain, G-beta repeat protein protein
POPTR_011G016400v3	866.442	1.41632	1.33642e-08
POPTR_003G117500v3	149.48	1.41624	1.56644e-19	NA	NA
POPTR_001G102051v3	1053.59	1.41499	6.27267e-11	NA	NA
POPTR_015G066600v3	886.65	1.41371	6.29437e-17	AT1G74770	zinc ion binding
POPTR_004G231300v3	140.44	1.41005	5.62136e-10	NA	NA
POPTR_008G025700v3	230.569	1.406	2.50027e-20	AT4G40045
POPTR_009G081800v3	733.935	1.40592	4.91242e-07
POPTR_009G060800v3	2098.78	1.40439	2.48389e-50	AT5G05170	Cellulose synthase family protein
POPTR_002G183900v3	102.251	1.40418	1.34659e-11	NA	NA
POPTR_006G151300v3	340.709	1.40402	4.59598e-31	NA	NA
POPTR_015G087100v3	103.528	1.40266	5.00912e-08	AT4G24760	alpha/beta-Hydrolases superfamily protein
POPTR_003G071000v3	132.898	1.40202	2.85149e-09	NA	NA
POPTR_006G062700v3	127.789	1.40201	2.52112e-10	AT5G35810	Ankyrin repeat family protein
POPTR_009G130600v3	122.539	1.40133	1.02758e-13	AT3G19360	Zinc finger (CCCH-type) family protein
POPTR_011G052600v3	743.447	1.40128	9.10039e-20	NA	NA
POPTR_017G019900v3	1072.16	1.3996	8.07685e-58
POPTR_014G026500v3	797.351	1.3995	5.35482e-27	NA	NA
POPTR_001G201500v3	126.259	1.39882	3.44087e-10	AT1G52510	alpha/beta-Hydrolases superfamily protein
POPTR_008G027900v3	135.213	1.3987	1.23142e-14
POPTR_001G161400v3	381.526	1.39694	6.75786e-14	NA	NA
POPTR_014G068200v3	2103.31	1.39681	4.35457e-36	AT3G60750	Transketolase
POPTR_009G140500v3	135.812	1.39475	9.3877e-08	AT2G47450	chloroplast signal recognition particle component (CAO)
POPTR_004G187500v3	2085.81	1.39351	4.50286e-34	AT5G22580	Stress responsive A/B Barrel Domain
POPTR_005G051700v3	289.006	1.39318	2.51795e-20	NA	NA
POPTR_001G403700v3	324.718	1.39241	2.54069e-28	NA	NA
POPTR_005G039100v3	772.89	1.39163	9.37116e-42	NA	NA
POPTR_008G119400v3	421.711	1.39075	6.63037e-37	AT1G68580	agenet domain-containing protein / bromo-adjacent homology (BAH) domain-containing protein
POPTR_007G011600v3	407.74	1.39046	5.41397e-37	AT5G10510	AINTEGUMENTA-like 6
POPTR_005G209500v3	176.349	1.38973	9.32378e-21	NA	NA
POPTR_002G193900v3	203.212	1.38764	3.54197e-22	NA	NA
POPTR_006G068200v3	598.135	1.38744	2.48882e-48	AT5G20190	Tetratricopeptide repeat (TPR)-like superfamily protein
POPTR_006G022300v3	101.246	1.38635	5.11187e-11
POPTR_010G125100v3	120.908	1.38513	6.15212e-14	AT1G25440	B-box type zinc finger protein with CCT domain
POPTR_014G180100v3	318.128	1.38329	3.71043e-17	NA	NA
POPTR_013G133800v3	806.973	1.38268	2.28855e-25	NA	NA
POPTR_003G151000v3	215.044	1.3822	1.28509e-16	NA	NA
POPTR_002G242900v3	473.319	1.38144	9.20422e-48	NA	NA
POPTR_014G129000v3	364.528	1.38128	1.33559e-40	NA	NA
POPTR_017G009900v3	789.692	1.38071	5.08882e-09	NA	NA
POPTR_016G062100v3	453.266	1.37919	8.5143e-48	NA	NA
POPTR_016G029100v3	557.93	1.37747	2.42443e-31	NA	NA
POPTR_011G156200v3	262.083	1.37599	1.34003e-19	NA	NA
POPTR_003G104000v3	123.178	1.37394	3.39808e-11	NA	NA
POPTR_004G019900v3	810.78	1.37392	1.67707e-37	AT1G61800	glucose-6-phosphate/phosphate translocator 2
POPTR_007G003100v3	884.242	1.37347	2.80532e-26	AT3G13050	Major facilitator superfamily protein
POPTR_001G360700v3	557.212	1.37172	4.09354e-32	AT1G66980	suppressor of npr1-1 constitutive 4
POPTR_017G143700v3	132.174	1.37157	1.16943e-14	NA	NA
POPTR_009G090700v3	1608.31	1.36914	4.54822e-20
POPTR_005G239100v3	4638.41	1.36874	3.11834e-65	NA	NA
POPTR_001G195300v3	218.067	1.36849	1.86156e-20	NA	NA
POPTR_019G010600v3	112.89	1.36707	5.02521e-17	NA	NA
POPTR_004G065200v3	206.115	1.36156	1.90576e-15
POPTR_016G106900v3	402.344	1.35986	5.97085e-13	NA	NA
POPTR_011G080900v3	350.889	1.35809	2.4396e-25	NA	NA
POPTR_008G135800v3	142.054	1.3577	3.79831e-09
POPTR_001G215000v3	197.016	1.3573	1.21014e-29	AT5G22050	Protein kinase superfamily protein
POPTR_008G151200v3	1886.37	1.35589	5.05953e-23	AT3G22380	time for coffee
POPTR_014G020100v3	214.614	1.35589	8.70738e-21	NA	NA
POPTR_012G095000v3	202.296	1.35535	5.71243e-22	NA	NA
POPTR_001G012300v3	590.524	1.35464	2.38193e-34
POPTR_013G044900v3	262.253	1.35421	5.83825e-31	NA	NA
POPTR_014G088100v3	5512.7	1.35338	8.1522e-41
POPTR_019G084100v3	330.509	1.35246	3.56321e-28	NA	NA
POPTR_010G025800v3	123.915	1.35194	0.000361632
POPTR_017G115300v3	248.858	1.35084	2.07522e-25
POPTR_014G148900v3	525.621	1.35022	9.55472e-31	NA	NA
POPTR_006G092000v3	1107.9	1.34816	2.29478e-64	AT3G53960	Major facilitator superfamily protein
POPTR_016G119600v3	124.155	1.348	5.12304e-12	NA	NA
POPTR_005G022600v3	371.475	1.34488	6.43464e-35	NA	NA
POPTR_009G113300v3	190.762	1.34422	1.07085e-14	AT1G75110	Nucleotide-diphospho-sugar transferase family protein
POPTR_011G125200v3	144.956	1.34306	1.01387e-20	NA	NA
POPTR_008G147600v3	210.174	1.34258	2.75056e-19	AT1G14270	CAAX amino terminal protease family protein
POPTR_005G182900v3	471.907	1.34036	4.16722e-30	NA	NA
POPTR_003G207600v3	288.727	1.33999	4.19467e-26	AT4G12070
POPTR_009G048700v3	145.872	1.33692	3.40625e-13	AT1G50420	scarecrow-like 3
POPTR_009G005400v3	425.069	1.33378	9.82479e-27	NA	NA
POPTR_010G136700v3	171.456	1.3331	1.78234e-19	AT1G68990	male gametophyte defective 3
POPTR_003G172600v3	772.051	1.3322	2.63635e-36	NA	NA
POPTR_007G030700v3	761.469	1.33167	2.65944e-42
POPTR_009G039300v3	366.917	1.33019	5.90561e-22	AT2G29510	Protein of unknown function (DUF3527)
POPTR_019G100800v3	1337.8	1.32968	4.27359e-98	NA	NA
POPTR_015G056900v3	318.967	1.32958	7.14375e-05	AT1G74310	heat shock protein 101
POPTR_005G226000v3	2937.57	1.32923	9.81644e-148	NA	NA
POPTR_005G127200v3	147.158	1.32869	3.28453e-08	NA	NA
POPTR_004G089800v3	723.071	1.32852	1.19601e-59
POPTR_003G089600v3	284.266	1.32847	2.36596e-17	NA	NA
POPTR_003G218400v3	310.576	1.32764	2.8001e-19
POPTR_014G012400v3	282.428	1.32733	1.95547e-26	NA	NA
POPTR_006G062900v3	349.771	1.32483	2.02796e-26	AT5G35810	Ankyrin repeat family protein
POPTR_008G186800v3	284.114	1.32437	1.23301e-14	AT1G70630	Nucleotide-diphospho-sugar transferase family protein
POPTR_001G340300v3	1236.48	1.32292	4.95452e-28	AT3G01680	(1 of 3) PF14576 - Sieve element occlusion N-terminus (SEO_N)
POPTR_011G147400v3	691.032	1.32277	1.214e-27	NA	NA
POPTR_001G066500v3	455.094	1.32243	4.17015e-06	NA	NA
POPTR_004G100000v3	248.446	1.31801	2.85574e-05	AT5G38410	Ribulose bisphosphate carboxylase (small chain) family protein
POPTR_007G004900v3	163.031	1.31722	1.74969e-12	AT5G67570	Tetratricopeptide repeat (TPR)-like superfamily protein
POPTR_002G238900v3	190.879	1.31584	4.42367e-12	NA	NA
POPTR_012G046300v3	615.913	1.31486	1.0081e-14	NA	NA
POPTR_008G166700v3	227.594	1.31486	0.000547901	AT1G06180	myb domain protein 13
POPTR_007G123900v3	109.741	1.31394	3.65284e-10	AT3G18110	Pentatricopeptide repeat (PPR) superfamily protein
POPTR_004G200100v3	422.553	1.31273	1.171e-32
POPTR_004G164000v3	343.002	1.3117	5.79788e-22	AT4G34740	GLN phosphoribosyl pyrophosphate amidotransferase 2
POPTR_002G169800v3	513.8	1.31128	8.02405e-45	AT5G08610	P-loop containing nucleoside triphosphate hydrolases superfamily protein
POPTR_005G002800v3	947.085	1.31098	3.36212e-17	NA	NA
POPTR_002G146300v3	1492.7	1.31074	4.48289e-10	NA	NA
POPTR_001G345300v3	7222.54	1.30838	3.52133e-10	AT5G40450
POPTR_015G034700v3	4040.84	1.30605	1.01043e-40	AT1G66200	glutamine synthase clone F11
POPTR_006G067100v3	134.42	1.30576	6.41295e-10	AT3G24150
POPTR_005G145500v3	401.029	1.30395	3.94353e-20	NA	NA
POPTR_018G069450v3	595.398	1.30205	9.21404e-55	AT4G29210	gamma-glutamyl transpeptidase 4
POPTR_009G079500v3	811.852	1.30119	9.2286e-46	AT5G64410	oligopeptide transporter 4
POPTR_003G079800v3	273.274	1.29976	5.99401e-22	NA	NA
POPTR_006G051000v3	423.598	1.29943	2.5763e-31	AT3G57420	Protein of unknown function (DUF288)
POPTR_007G091900v3	1075.75	1.2988	3.01459e-21	AT4G39840	(1 of 1) KOG3116 - Predicted C3H1-type Zn-finger protein
POPTR_006G152800v3	536.286	1.29879	7.45753e-26	NA	NA
POPTR_014G024400v3	177.991	1.29705	2.41881e-15	NA	NA
POPTR_013G073900v3	287.519	1.29693	1.18658e-19	AT5G35970	P-loop containing nucleoside triphosphate hydrolases superfamily protein
POPTR_014G137200v3	326.757	1.29533	1.49546e-09	NA	NA
POPTR_010G113900v3	196.484	1.29423	4.07064e-17	AT1G71020	ARM repeat superfamily protein
POPTR_005G259300v3	410.056	1.29403	1.19144e-25	NA	NA
POPTR_016G067000v3	312.865	1.29373	7.54239e-30	NA	NA
POPTR_001G029300v3	113.244	1.29087	8.45899e-11	NA	NA
POPTR_019G079500v3	1342.44	1.28977	2.82869e-70	NA	NA
POPTR_017G029000v3	4653.65	1.28864	1.44214e-72	AT1G06020	pfkB-like carbohydrate kinase family protein
POPTR_017G095632v3	166.646	1.28859	0.00163774
POPTR_018G060000v3	181.547	1.28674	1.41903e-13	AT4G33120	S-adenosyl-L-methionine-dependent methyltransferases superfamily protein
POPTR_001G170500v3	203.002	1.28583	5.39701e-19	NA	NA
POPTR_008G088500v3	179.942	1.28224	1.3106e-15	AT1G69526	S-adenosyl-L-methionine-dependent methyltransferases superfamily protein
POPTR_004G147800v3	675.638	1.28212	1.54675e-12
POPTR_018G103300v3	181.079	1.2807	3.45128e-12	NA	NA
POPTR_003G181800v3	285.313	1.28054	1.82726e-26	NA	NA
POPTR_017G143433v3	190.337	1.2798	7.96376e-15	NA	NA
POPTR_004G089100v3	394.216	1.2797	1.22503e-29	AT1G66460	Protein kinase superfamily protein
POPTR_T126606v3	108.727	1.27849	1.48904e-08
POPTR_010G053400v3	310.227	1.27832	1.22842e-25
POPTR_002G140500v3	516.475	1.27785	2.62159e-41	NA	NA
POPTR_002G220566v3	687.378	1.27696	1.91844e-13	NA	NA
POPTR_013G100800v3	123096	1.2762	0.00019089	NA	NA
POPTR_015G117300v3	142.73	1.27572	4.63326e-15
POPTR_016G001100v3	522.627	1.27541	1.44738e-23	AT2G01060	myb-like HTH transcriptional regulator family protein
POPTR_014G173300v3	219.183	1.27517	1.55418e-19	NA	NA
POPTR_005G184500v3	4812.44	1.27491	7.08248e-42	NA	NA
POPTR_017G130800v3	104.109	1.27396	4.41511e-13	NA	NA
POPTR_010G145900v3	738.416	1.27014	2.47113e-39	AT4G16250	phytochrome D
POPTR_015G012300v3	276.882	1.26974	3.31986e-24	AT4G27840	SNARE-like superfamily protein
POPTR_004G231200v3	140.774	1.26809	7.9317e-14	NA	NA
POPTR_019G028800v3	1603.46	1.26791	4.09031e-20	NA	NA
POPTR_006G229300v3	872.888	1.26717	1.79341e-44	NA	NA
POPTR_015G066400v3	195.226	1.26714	8.21341e-17	AT1G74750	Pentatricopeptide repeat (PPR) superfamily protein
POPTR_012G024700v3	438.075	1.26689	3.5429e-17	NA	NA
POPTR_014G049000v3	127.888	1.26653	2.87348e-08
POPTR_013G017300v3	1484.54	1.26552	3.52177e-37	NA	NA
POPTR_015G083300v3	191.729	1.26516	8.73027e-15	AT1G15530	Concanavalin A-like lectin protein kinase family protein
POPTR_010G229000v3	672.925	1.26361	2.113e-36	AT5G04310	Pectin lyase-like superfamily protein
POPTR_010G062600v3	401.947	1.26329	2.08066e-27	AT4G13540	(1 of 2) PTHR37226:SF1 - GENOMIC DNA, CHROMOSOME 3, BAC CLONE:F14O13
POPTR_018G150700v3	126.566	1.26095	1.11817e-14	NA	NA
POPTR_005G254100v3	1046.95	1.26091	1.02655e-19	NA	NA
POPTR_010G219500v3	847.524	1.26038	2.24399e-35	AT1G07920	GTP binding Elongation factor Tu family protein
POPTR_011G090200v3	255.166	1.25972	0.00241731	NA	NA
POPTR_001G317600v3	186.888	1.2594	5.56033e-15	AT1G04920	sucrose phosphate synthase 3F
POPTR_013G110700v3	605.725	1.25743	3.89019e-38	NA	NA
POPTR_014G115200v3	176.699	1.25714	1.86802e-14	NA	NA
POPTR_015G082800v3	168.408	1.25583	5.21782e-18
POPTR_004G202683v3	154.347	1.25577	7.82999e-08
POPTR_017G150100v3	702.106	1.25571	1.16734e-05	NA	NA
POPTR_011G136900v3	271.879	1.25294	1.42203e-23	NA	NA
POPTR_014G133700v3	130.506	1.25195	8.50913e-11	NA	NA
POPTR_007G114800v3	115.566	1.2517	5.62066e-10	AT5G64360	Chaperone DnaJ-domain superfamily protein
POPTR_003G201800v3	1095.82	1.25044	2.67903e-05	AT3G14470	NB-ARC domain-containing disease resistance protein
POPTR_006G134300v3	730.864	1.25003	3.27302e-55	NA	NA
POPTR_015G118000v3	1479.79	1.24933	6.17563e-98	AT4G19700	SBP (S-ribonuclease binding protein) family protein
POPTR_010G200500v3	442.413	1.24852	2.67127e-21	AT2G39730	rubisco activase
POPTR_006G131300v3	739.424	1.24727	1.4502e-49	NA	NA
POPTR_007G053750v3	198.77	1.24387	1.18881e-17
POPTR_005G163600v3	522.672	1.24343	2.43993e-20	NA	NA
POPTR_001G423600v3	289.4	1.24315	4.94911e-13	AT1G72270	(1 of 2) PTHR13500 - NUCLEOLAR PRERIBOSOMAL-ASSOCIATED PROTEIN 1
POPTR_005G161900v3	165.813	1.24227	9.11963e-11	NA	NA
POPTR_001G060500v3	301.107	1.2416	1.37742e-24	NA	NA
POPTR_004G129400v3	369.573	1.24155	7.35428e-34	AT5G39890	Protein of unknown function (DUF1637)
POPTR_013G019200v3	299.151	1.2407	1.61801e-27	NA	NA
POPTR_004G117900v3	276.416	1.23966	2.25003e-18	AT5G15810	N2,N2-dimethylguanosine tRNA methyltransferase
POPTR_003G196300v3	357.722	1.23845	3.36681e-15	NA	NA
POPTR_014G097700v3	126.8	1.23748	1.05297e-13	AT5G08610	P-loop containing nucleoside triphosphate hydrolases superfamily protein
POPTR_002G231900v3	403.357	1.23406	3.18912e-22	NA	NA
POPTR_006G136900v3	524.708	1.23347	1.39611e-22	NA	NA
POPTR_010G103300v3	220.732	1.23343	0.000505783
POPTR_004G191300v3	437.939	1.23321	1.19973e-26	AT1G04580	aldehyde oxidase 4
POPTR_001G147801v3	139.301	1.23188	4.31686e-10	NA	NA
POPTR_006G029100v3	105.651	1.23157	3.36905e-09
POPTR_008G083100v3	436.82	1.23111	5.03648e-22	AT3G12750	zinc transporter 1 precursor
POPTR_010G023100v3	903.51	1.23105	3.47498e-43	AT1G29900	carbamoyl phosphate synthetase B
POPTR_008G054600v3	1687.56	1.22979	8.71156e-28	AT5G02490	Heat shock protein 70 (Hsp 70) family protein
POPTR_015G136400v3	329.384	1.22772	1.12343e-05	AT4G25480	dehydration response element B1A
POPTR_010G038100v3	263.92	1.22719	5.21159e-15	NA	NA
POPTR_003G067800v3	323.257	1.2264	3.31677e-19	NA	NA
POPTR_002G045400v3	306.984	1.22605	1.08652e-20	NA	NA
POPTR_015G075200v3	259.423	1.22589	1.1326e-29
POPTR_009G152800v3	5585.08	1.22562	3.71844e-80
POPTR_010G214700v3	286.301	1.22537	3.1636e-31	AT3G12620	Protein phosphatase 2C family protein
POPTR_001G253800v3	254.453	1.2252	9.79261e-21	AT1G77210	sugar transporter 14
POPTR_003G219000v3	149.914	1.22427	4.14784e-14
POPTR_014G147300v3	454.975	1.22348	7.41815e-16	NA	NA
POPTR_007G132000v3	1234.13	1.22207	2.33753e-77
POPTR_014G151800v3	309.815	1.2217	3.2524e-36	NA	NA
POPTR_016G132200v3	1150.73	1.21983	4.27139e-45	NA	NA
POPTR_006G006000v3	1419.7	1.2198	3.15732e-06	AT4G16370	oligopeptide transporter
POPTR_012G005900v3	977.338	1.2198	1.30223e-31	NA	NA
POPTR_019G085800v3	1365.32	1.21975	6.43931e-51	NA	NA
POPTR_004G020500v3	251.036	1.21929	6.17259e-12	AT5G54770	thiazole biosynthetic enzyme, chloroplast (ARA6) (THI1) (THI4)
POPTR_002G126300v3	970.607	1.21895	2.79465e-06	AT4G25000	alpha-amylase-like
POPTR_008G179800v3	211.723	1.21874	5.28511e-11	AT3G26000	Ribonuclease inhibitor
POPTR_004G046100v3	171.625	1.21837	5.46741e-17
POPTR_002G263800v3	108.558	1.21812	2.99484e-11	NA	NA
POPTR_006G071200v3	335.576	1.2164	9.61543e-14	AT5G57560	Xyloglucan endotransglucosylase/hydrolase family protein
POPTR_001G348300v3	398.118	1.2162	3.42324e-21	AT5G14570	high affinity nitrate transporter 2.7
POPTR_002G033800v3	519.545	1.21596	3.01431e-23	NA	NA
POPTR_010G024900v3	284.854	1.21545	2.10852e-20	AT3G16565	alanine-tRNA ligases;nucleic acid binding;ligases, forming aminoacyl-tRNA and related compounds;nucleotide binding;ATP binding
POPTR_008G171700v3	561.021	1.21443	2.87132e-35	AT2G33330	plasmodesmata-located protein 3
POPTR_015G117500v3	162.308	1.21365	1.36336e-15	AT3G05320	O-fucosyltransferase family protein
POPTR_002G262900v3	359.997	1.21316	1.05701e-25	NA	NA
POPTR_007G119300v3	707.231	1.21289	4.2289e-18	AT4G15180	SET domain protein 2
POPTR_014G053700v3	924.322	1.21006	9.25813e-18
POPTR_012G014300v3	320.147	1.21003	3.21009e-22	NA	NA
POPTR_002G029200v3	149.691	1.20968	7.51085e-14	NA	NA
POPTR_006G076900v3	1958.8	1.20914	4.32112e-50	AT4G30110	heavy metal atpase 2
POPTR_013G109400v3	118.748	1.20876	1.14855e-13	NA	NA
POPTR_018G113500v3	982.883	1.20753	1.23611e-56	NA	NA
POPTR_003G003500v3	808.965	1.20648	3.68376e-42	NA	NA
POPTR_012G049000v3	160.561	1.20626	4.88033e-16	NA	NA
POPTR_002G034600v3	611.385	1.20609	3.22611e-27	NA	NA
POPTR_001G358500v3	1339.17	1.2052	8.86771e-21	AT1G30330	auxin response factor 6
POPTR_001G345500v3	275.52	1.20474	8.6827e-15	AT5G40440	mitogen-activated protein kinase kinase 3
POPTR_015G144200v3	555.293	1.20381	3.80243e-30	AT5G23760	Copper transport protein family
POPTR_010G195500v3	159.957	1.20236	8.94277e-11	AT3G55710	UDP-Glycosyltransferase superfamily protein
POPTR_010G130800v3	326.804	1.20189	9.82057e-21	AT3G25690	Hydroxyproline-rich glycoprotein family protein
POPTR_015G012000v3	267.28	1.20186	1.63488e-13	AT5G53020	Ribonuclease P protein subunit P38-related
POPTR_002G228600v3	232.258	1.20112	7.52634e-17	NA	NA
POPTR_016G137400v3	358.679	1.20025	2.16632e-32	NA	NA
POPTR_017G016000v3	1484.75	1.19996	1.3638e-43	AT4G28480	DNAJ heat shock family protein
POPTR_009G081600v3	342.029	1.19945	3.48845e-16
POPTR_016G109000v3	326.945	1.19797	5.04566e-21	NA	NA
POPTR_006G007300v3	215.941	1.19769	3.29892e-14
POPTR_012G109200v3	266.123	1.19738	1.96979e-17	NA	NA
POPTR_019G020500v3	322.442	1.1969	4.78265e-12	NA	NA
POPTR_019G119200v3	112.834	1.19623	0.00361766	NA	NA
POPTR_017G030100v3	149.208	1.19589	6.69555e-14	AT3G59400	enzyme binding;tetrapyrrole binding
POPTR_017G150000v3	6958.2	1.19448	1.80544e-16	NA	NA
POPTR_016G098500v3	676.028	1.19387	5.47989e-31	NA	NA
POPTR_013G133400v3	1585.52	1.19324	1.61787e-45	NA	NA
POPTR_011G156600v3	530.145	1.19162	8.78025e-35	NA	NA
POPTR_013G148700v3	488.1	1.19153	1.843e-42	NA	NA
POPTR_011G032700v3	353.458	1.19073	1.05092e-23	NA	NA
POPTR_007G071300v3	311.672	1.19059	5.6415e-10	AT5G23120	photosystem II stability/assembly factor, chloroplast (HCF136)
POPTR_004G091000v3	486.357	1.18955	1.25033e-15	AT5G37830	oxoprolinase 1
POPTR_006G190200v3	230.501	1.18931	1.11032e-10	NA	NA
POPTR_001G279100v3	555.199	1.18792	1.68225e-34	AT1G07110	fructose-2,6-bisphosphatase
POPTR_007G135400v3	550.055	1.18716	2.99557e-16
POPTR_008G054700v3	7102.86	1.18667	1.81433e-31
POPTR_004G084000v3	218.99	1.18559	2.50025e-18	AT1G66150	transmembrane kinase 1
POPTR_T126906v3	129.684	1.18531	2.12511e-08	AT3G54500
POPTR_015G131800v3	288.899	1.18504	2.46073e-26	AT5G51670	Protein of unknown function (DUF668)
POPTR_005G027600v3	196.639	1.18433	2.45819e-14	NA	NA
POPTR_001G170700v3	700.405	1.18311	8.53567e-23	NA	NA
POPTR_009G099300v3	3028.39	1.18013	4.06861e-33	AT1G49760	poly(A) binding protein 8
POPTR_014G086900v3	169.688	1.18	9.59981e-13	AT4G00340	receptor-like protein kinase 4
POPTR_017G116700v3	133.717	1.17972	1.82112e-11	AT5G16180	ortholog of maize chloroplast splicing factor CRS1
POPTR_019G120300v3	269.791	1.17968	1.66527e-23	NA	NA
POPTR_002G094900v3	123.907	1.1794	1.09343e-12	NA	NA
POPTR_011G066700v3	205.841	1.1793	1.68471e-20	NA	NA
POPTR_003G111400v3	4236.5	1.179	7.3215e-52	NA	NA
POPTR_005G098100v3	335.212	1.17893	9.20965e-19	NA	NA
POPTR_006G068500v3	4692.12	1.17854	7.48726e-45	AT2G25490	EIN3-binding F box protein 1
POPTR_016G051500v3	1465.34	1.17797	7.03356e-62	NA	NA
POPTR_005G247700v3	1775.97	1.17743	1.78247e-47	NA	NA
POPTR_012G105700v3	232.202	1.17731	3.93798e-12	NA	NA
POPTR_002G155700v3	151.921	1.17671	9.62249e-11
POPTR_011G083100v3	213.238	1.17548	1.06551e-12	NA	NA
POPTR_008G145500v3	237.809	1.17542	2.29196e-15
POPTR_010G250800v3	518.682	1.17471	6.8909e-17	NA	NA
POPTR_004G213300v3	1345.58	1.17431	1.51438e-34	AT2G27990	BEL1-like homeodomain 8
POPTR_010G205800v3	3025.64	1.17127	5.1792e-30	AT5G02490	Heat shock protein 70 (Hsp 70) family protein
POPTR_015G132100v3	132.227	1.17119	1.40496e-12	AT5G51690	1-amino-cyclopropane-1-carboxylate synthase 12
POPTR_007G099800v3	336.58	1.17006	3.65665e-16	AT5G63810	beta-galactosidase 10
POPTR_003G045000v3	102.52	1.16828	7.60939e-11
POPTR_019G055600v3	391.854	1.16634	1.57493e-19	NA	NA
POPTR_002G260100v3	2012.46	1.16508	3.17144e-08	NA	NA
POPTR_005G163700v3	2381.41	1.16475	1.33361e-46	NA	NA
POPTR_010G083600v3	527.462	1.16429	1.52333e-31	AT3G22740	homocysteine S-methyltransferase 3
POPTR_013G008200v3	559.94	1.16364	6.8746e-25	NA	NA
POPTR_005G118700v3	848.324	1.16277	1.12852e-20	NA	NA
POPTR_010G096550v3	126.3	1.16231	2.84126e-07
POPTR_008G213500v3	582.284	1.16117	4.5879e-24	NA	NA
POPTR_005G228100v3	485.043	1.16074	2.48796e-10	NA	NA
POPTR_008G183400v3	262.087	1.15891	5.46975e-12	AT3G26140	Cellulase (glycosyl hydrolase family 5) protein
POPTR_009G041800v3	1751.3	1.15733	1.73355e-33	AT3G46970	alpha-glucan phosphorylase 2
POPTR_002G049400v3	3629.81	1.15646	4.82222e-34	NA	NA
POPTR_001G125800v3	156.929	1.15583	1.27934e-10	NA	NA
POPTR_004G207500v3	268.993	1.15462	2.26368e-16	AT2G17300
POPTR_014G101400v3	152.13	1.15372	1.02415e-12	NA	NA
POPTR_005G071900v3	4893.47	1.15324	3.18811e-108	NA	NA
POPTR_003G207900v3	146.802	1.15309	2.50276e-10	AT4G31980	(1 of 1) PF03140//PF05903 - Plant protein of unknown function (DUF247) // PPPDE putative peptidase domain (Peptidase_C97)
POPTR_005G042900v3	884.714	1.15243	7.08944e-13	NA	NA
POPTR_009G158400v3	432.908	1.15195	5.01948e-21	AT2G27110	FAR1-related sequence 3
POPTR_002G030400v3	1999.59	1.15174	3.22886e-70	NA	NA
POPTR_006G085400v3	1795.71	1.1512	1.19328e-46	AT4G26870	Class II aminoacyl-tRNA and biotin synthetases superfamily protein
POPTR_001G184100v3	454.234	1.14845	9.63034e-29	AT1G79840	HD-ZIP IV family of homeobox-leucine zipper protein with lipid-binding START domain
POPTR_003G012100v3	457.652	1.14792	3.09372e-23	NA	NA
POPTR_009G133100v3	1242.74	1.14745	2.40938e-18	AT2G16700	actin depolymerizing factor 5
POPTR_003G113500v3	375.889	1.14733	1.98904e-19	NA	NA
POPTR_006G218200v3	751.161	1.1464	6.20118e-08	NA	NA
POPTR_004G175800v3	342.139	1.146	3.31755e-13	AT1G68010	hydroxypyruvate reductase
POPTR_005G150100v3	108.034	1.14599	1.43785e-08	NA	NA
POPTR_017G108800v3	5151.52	1.14598	3.89833e-45	AT3G02470	S-adenosylmethionine decarboxylase
POPTR_005G232500v3	598.853	1.14506	7.47257e-32	NA	NA
POPTR_001G168700v3	132.893	1.14495	1.05677e-08	NA	NA
POPTR_001G412000v3	653.081	1.14475	4.66583e-05	NA	NA
POPTR_008G048900v3	768.798	1.14387	1.14323e-29	AT3G55200	Cleavage and polyadenylation specificity factor (CPSF) A subunit protein
POPTR_008G095800v3	136.84	1.14314	2.19691e-09	AT1G68980	Tetratricopeptide repeat (TPR)-like superfamily protein
POPTR_010G212100v3	497.49	1.14271	8.40396e-20	AT3G55200	Cleavage and polyadenylation specificity factor (CPSF) A subunit protein
POPTR_001G320400v3	2463.82	1.14246	1.03688e-51	AT4G13930	serine hydroxymethyltransferase 4
POPTR_016G070200v3	372.027	1.14213	7.94171e-22	NA	NA
POPTR_018G081700v3	304.258	1.14182	7.70966e-18	AT5G21222	protein kinase family protein
POPTR_012G082700v3	221.668	1.14181	6.16021e-15	NA	NA
POPTR_008G058500v3	416.773	1.14144	4.03827e-22	AT2G39730	rubisco activase
POPTR_008G074100v3	582.89	1.14133	3.78078e-31	AT3G56130	biotin/lipoyl attachment domain-containing protein
POPTR_001G110200v3	625.235	1.14083	1.00591e-27	NA	NA
POPTR_002G064000v3	193.872	1.14041	1.45826e-13	NA	NA
POPTR_017G041100v3	842.958	1.13851	1.18913e-11	AT4G15180	SET domain protein 2
POPTR_017G116000v3	162.209	1.13818	6.37259e-15	AT1G67040	(1 of 4) PTHR21726:SF29 - F1O19.10 PROTEIN
POPTR_001G173500v3	179.867	1.13736	1.99198e-14	NA	NA
POPTR_019G023300v3	171.389	1.13666	1.10093e-11	NA	NA
POPTR_012G105300v3	141.521	1.13652	1.94521e-06	NA	NA
POPTR_013G036600v3	326.927	1.13638	6.49782e-24	NA	NA
POPTR_008G156000v3	560.97	1.13607	2.84034e-33	AT3G22750	Protein kinase superfamily protein
POPTR_002G012000v3	546.389	1.13562	1.02113e-17	NA	NA
POPTR_010G185300v3	1068.7	1.13545	2.02513e-38
POPTR_002G144700v3	315.513	1.13531	3.66352e-23	NA	NA
POPTR_003G222700v3	12010.3	1.13515	1.94653e-42	AT1G55500	evolutionarily conserved C-terminal region 4
POPTR_001G317200v3	272.165	1.13339	3.74043e-11	AT4G13750	Histidine kinase-, DNA gyrase B-, and HSP90-like ATPase family protein
POPTR_001G185050v3	231.355	1.13205	6.37012e-13	AT1G79830	golgin candidate 5
POPTR_005G218600v3	183.144	1.13168	1.42551e-15	NA	NA
POPTR_005G063300v3	248.077	1.13126	1.1684e-15	NA	NA
POPTR_012G048600v3	163.024	1.13074	1.12299e-14	NA	NA
POPTR_014G072100v3	802.076	1.13072	1.00243e-24
POPTR_006G118000v3	445.985	1.13006	4.5984e-31	AT5G03795	Exostosin family protein
POPTR_011G064700v3	109.798	1.12952	1.4417e-08	NA	NA
POPTR_003G121500v3	136.864	1.12855	3.11498e-13	NA	NA
POPTR_003G089300v3	160.987	1.12777	1.0825e-07	NA	NA
POPTR_017G125200v3	490.469	1.12697	1.09783e-23
POPTR_017G108100v3	237.919	1.12598	6.17416e-13	AT5G15980	Pentatricopeptide repeat (PPR) superfamily protein
POPTR_003G002950v3	151.647	1.12563	2.10111e-07	NA	NA
POPTR_011G072300v3	415.411	1.12516	2.92747e-12	NA	NA
POPTR_006G234500v3	829.421	1.12501	7.25013e-29	NA	NA
POPTR_001G166900v3	204.059	1.12444	1.3014e-13	NA	NA
POPTR_005G018700v3	9817.61	1.1239	6.44046e-60	NA	NA
POPTR_010G173600v3	499.269	1.12297	5.01109e-20	AT1G79470	Aldolase-type TIM barrel family protein
POPTR_009G124100v3	1354.29	1.12275	3.30602e-05	AT2G21330	fructose-bisphosphate aldolase 1
POPTR_003G030900v3	390.412	1.12243	1.25199e-18	NA	NA
POPTR_015G069700v3	1665.88	1.12171	2.18198e-22	AT2G21390	Coatomer, alpha subunit
POPTR_014G175600v3	3206.59	1.12077	5.99692e-18	NA	NA
POPTR_002G097700v3	124.232	1.12047	4.49409e-11	NA	NA
POPTR_002G032900v3	296.818	1.12017	1.7658e-22	NA	NA
POPTR_015G147700v3	183.239	1.11982	5.80214e-17	AT2G42650	Ribosomal protein L1p/L10e family
POPTR_018G066400v3	611.533	1.11955	2.11661e-35	AT2G19570	cytidine deaminase 1
POPTR_001G324200v3	152.956	1.11941	1.54264e-11	AT3G26820	Esterase/lipase/thioesterase family protein
POPTR_011G005900v3	218.946	1.11913	2.62006e-13
POPTR_015G066500v3	723.757	1.11843	1.85123e-26	AT3G47910	Ubiquitin carboxyl-terminal hydrolase-related protein
POPTR_001G186900v3	278.798	1.11721	1.0052e-21	AT1G52160	tRNAse Z3
POPTR_012G089300v3	133.35	1.11687	1.52017e-10	NA	NA
POPTR_015G119800v3	421.572	1.11611	1.21881e-10
POPTR_008G129400v3	1918.13	1.11485	1.26189e-17	AT1G23080	Auxin efflux carrier family protein
POPTR_003G125000v3	309.025	1.11392	7.96149e-21	NA	NA
POPTR_019G025100v3	389.345	1.11246	2.06937e-23	NA	NA
POPTR_017G095500v3	1066.51	1.11136	7.66834e-13
POPTR_005G061860v3	156.381	1.11087	7.84819e-06	NA	NA
POPTR_001G166500v3	219.821	1.11002	6.85477e-14	NA	NA
POPTR_001G060400v3	369.922	1.10921	1.11754e-21	NA	NA
POPTR_010G046100v3	144.384	1.10697	1.98995e-13	NA	NA
POPTR_006G273900v3	307.545	1.10673	3.04877e-13
POPTR_012G092400v3	212.408	1.10648	2.97626e-16	NA	NA
POPTR_005G211100v3	196.755	1.10641	3.70421e-12	NA	NA
POPTR_015G004500v3	237.693	1.10557	1.69847e-14
POPTR_008G085300v3	433.664	1.10458	1.71663e-14	AT3G19870	(1 of 1) PTHR34033:SF1 - AP-5 COMPLEX SUBUNIT BETA-1
POPTR_016G064600v3	102.68	1.10368	6.15102e-10	NA	NA
POPTR_014G165000v3	210.613	1.1033	9.45914e-14	NA	NA
POPTR_005G146900v3	508.996	1.10285	6.91486e-16	NA	NA
POPTR_003G134500v3	4583.49	1.10284	4.47722e-39	NA	NA
POPTR_010G063000v3	259.357	1.10231	4.23494e-14	AT1G47960	cell wall / vacuolar inhibitor of fructosidase 1
POPTR_001G182700v3	565.276	1.10101	1.75588e-33
POPTR_008G125800v3	141.086	1.10084	2.58844e-08
POPTR_018G063901v3	830.646	1.10076	1.72393e-21
POPTR_001G460400v3	660.21	1.10071	9.93695e-33
POPTR_008G126100v3	390.353	1.10043	8.49465e-25	AT1G15110	phosphatidyl serine synthase family protein
POPTR_007G043700v3	205.571	1.09992	1.37502e-13
POPTR_018G130000v3	106.048	1.09956	1.97138e-10	NA	NA
POPTR_005G030700v3	1750.92	1.09935	0.00657423	NA	NA
POPTR_010G065400v3	370.461	1.09931	3.10033e-25	AT1G04530	Tetratricopeptide repeat (TPR)-like superfamily protein
POPTR_006G020900v3	636.789	1.09858	9.22963e-37	AT3G22200	Pyridoxal phosphate (PLP)-dependent transferases superfamily protein
POPTR_003G204300v3	1713.88	1.09739	2.21436e-45	AT3G51950	Zinc finger (CCCH-type) family protein / RNA recognition motif (RRM)-containing protein
POPTR_008G144700v3	102.323	1.09606	1.0162e-07	AT2G02220	phytosulfokin receptor 1
POPTR_010G213200v3	2131.51	1.09584	3.62013e-52
POPTR_006G256400v3	370.22	1.09469	2.26822e-21	AT2G25320	TRAF-like family protein
POPTR_002G047100v3	913.992	1.09427	1.63679e-26	NA	NA
POPTR_010G210900v3	392.447	1.09413	1.15932e-21	AT3G55270	mitogen-activated protein kinase phosphatase 1
POPTR_013G029500v3	198.046	1.09369	8.47783e-13	NA	NA
POPTR_010G093400v3	1269.94	1.09355	3.11868e-24	AT1G69780	Homeobox-leucine zipper protein family
POPTR_014G099100v3	350.699	1.09304	1.14401e-14	AT3G61780	embryo defective 1703
POPTR_005G001500v3	843.763	1.09244	9.85686e-31	NA	NA
POPTR_004G031200v3	424.216	1.09234	2.23683e-21	AT4G21310	Protein of unknown function (DUF1218)
POPTR_003G087700v3	1103.29	1.09057	2.82999e-38	NA	NA
POPTR_010G238000v3	337.11	1.09034	3.2979e-16	AT1G30240	(1 of 1) PF08167 - rRNA processing/ribosome biogenesis (RIX1)
POPTR_006G271800v3	489.761	1.08991	1.3125e-12
POPTR_011G125050v3	319.884	1.08981	5.07253e-14	NA	NA
POPTR_015G055000v3	140.441	1.08845	1.66793e-12
POPTR_002G102700v3	728.094	1.08747	1.8662e-33	NA	NA
POPTR_009G003100v3	361.176	1.08746	1.70951e-19	NA	NA
POPTR_001G178000v3	387.211	1.08723	8.82536e-10	NA	NA
POPTR_005G140300v3	542.169	1.08679	6.95014e-25	NA	NA
POPTR_002G208100v3	496.977	1.08674	7.12646e-26	NA	NA
POPTR_002G105100v3	324.174	1.08544	1.3377e-14	NA	NA
POPTR_013G069900v3	2919.19	1.08471	2.23025e-41	AT4G02600	Seven transmembrane MLO family protein
POPTR_002G141200v3	117.897	1.0845	6.40295e-10	NA	NA
POPTR_008G063500v3	224.565	1.08437	9.8929e-14	AT2G39910	ARM repeat superfamily protein
POPTR_005G207100v3	958.043	1.083	7.49456e-28	NA	NA
POPTR_011G021000v3	296.244	1.08254	8.5694e-21	AT1G62390	Octicosapeptide/Phox/Bem1p (PB1) domain-containing protein / tetratricopeptide repeat (TPR)-containing protein
POPTR_003G101000v3	293.231	1.08213	9.29041e-17	NA	NA
POPTR_012G084600v3	648.687	1.08202	4.34415e-33	NA	NA
POPTR_010G200200v3	874.651	1.08198	1.57604e-28	AT1G74260	purine biosynthesis 4
POPTR_001G320300v3	455.42	1.08151	2.50769e-11	AT2G31970	DNA repair-recombination protein (RAD50)
POPTR_004G207300v3	1664.73	1.0811	5.6914e-19	AT4G35310	calmodulin-domain protein kinase 5
POPTR_001G385300v3	451.199	1.08092	9.50142e-09	NA	NA
POPTR_001G432366v3	139.784	1.08074	0.0068848	AT1G52660	P-loop containing nucleoside triphosphate hydrolases superfamily protein
POPTR_002G068600v3	581.79	1.08067	8.78115e-35	NA	NA
POPTR_009G130400v3	216.089	1.08026	9.26339e-16	AT4G34880	Amidase family protein
POPTR_010G231100v3	292.727	1.07949	2.9832e-15	AT5G04460	RING/U-box superfamily protein
POPTR_012G014200v3	389.036	1.07807	1.70683e-18	NA	NA
POPTR_013G002400v3	388.205	1.07781	4.98199e-22	NA	NA
POPTR_002G213500v3	280.393	1.07511	3.02197e-17	NA	NA
POPTR_001G444000v3	144.115	1.0751	1.58999e-06
POPTR_013G005200v3	575.803	1.07505	9.02981e-19	NA	NA
POPTR_002G221400v3	7081.6	1.07474	1.42761e-15	NA	NA
POPTR_008G204900v3	107.615	1.07453	1.21809e-07	NA	NA
POPTR_014G003200v3	310.223	1.07425	2.83161e-12	NA	NA
POPTR_008G018400v3	247.699	1.07404	5.9273e-17	AT5G04840	bZIP protein
POPTR_001G003800v3	2040.33	1.07345	6.94523e-46	AT3G13510	Protein of Unknown Function (DUF239)
POPTR_010G077100v3	312.413	1.07337	9.15002e-21	AT4G14510	CRM family member 3B
POPTR_004G128601v3	408.713	1.07326	1.15327e-14	AT3G55160	(1 of 1) PTHR14387 - THADA/DEATH RECEPTOR INTERACTING PROTEIN
POPTR_001G208000v3	283.171	1.07255	6.25821e-22	AT2G01080	Late embryogenesis abundant (LEA) hydroxyproline-rich glycoprotein family
POPTR_015G076200v3	502.662	1.07206	1.23827e-34	AT5G62790	1-deoxy-D-xylulose 5-phosphate reductoisomerase
POPTR_006G230500v3	205.466	1.07168	1.0075e-12	NA	NA
POPTR_016G093100v3	110.914	1.07152	1.18018e-09	NA	NA
POPTR_004G019300v3	4118.77	1.07072	2.59198e-39	AT1G61810	beta-glucosidase 45
POPTR_012G047400v3	900.433	1.07068	4.35917e-27	NA	NA
POPTR_002G246500v3	1319.45	1.07061	3.84221e-45	NA	NA
POPTR_009G099800v3	598.5	1.07057	2.46184e-21	AT4G34050	S-adenosyl-L-methionine-dependent methyltransferases superfamily protein
POPTR_012G095600v3	179.743	1.07037	3.31545e-10	NA	NA
POPTR_006G216900v3	2390.56	1.06983	5.51018e-16	NA	NA
POPTR_017G067600v3	116.384	1.06975	3.88925e-09	AT4G14605	Mitochondrial transcription termination factor family protein
POPTR_012G144900v3	131.34	1.06954	3.91849e-08	NA	NA
POPTR_006G027600v3	567.553	1.0689	1.98653e-24
POPTR_003G131700v3	287.846	1.06874	9.4325e-17	NA	NA
POPTR_019G039600v3	352.792	1.06849	1.31612e-12	NA	NA
POPTR_004G164200v3	138.864	1.06831	1.70586e-11	AT4G34730	ribosome-binding factor A family protein
POPTR_001G246900v3	3035.08	1.0683	2.31475e-51	AT5G62690	tubulin beta chain 2
POPTR_014G142700v3	596.997	1.06795	1.36764e-15	NA	NA
POPTR_010G122866v3	194.836	1.06787	1.49343e-08
POPTR_002G104600v3	5448.52	1.06686	2.01377e-46	NA	NA
POPTR_010G157700v3	256.175	1.06662	1.25656e-20	AT2G03667	Asparagine synthase family protein
POPTR_001G318800v3	493.627	1.0659	1.45759e-12	AT4G30990	ARM repeat superfamily protein
POPTR_011G071300v3	349.734	1.06548	2.99012e-16	NA	NA
POPTR_001G107300v3	187.9	1.0651	8.98185e-16	NA	NA
POPTR_010G136800v3	1242.67	1.06466	7.68916e-31	AT2G04030	Chaperone protein htpG family protein
POPTR_006G197600v3	183.146	1.06434	1.45753e-10	NA	NA
POPTR_001G047500v3	427.929	1.06373	2.17811e-15	NA	NA
POPTR_008G180700v3	687.306	1.06368	1.93813e-25	AT2G02710	PAS/LOV protein B
POPTR_001G098700v3	214.714	1.06361	2.03574e-12	NA	NA
POPTR_016G092700v3	689.579	1.06306	7.67725e-25	NA	NA
POPTR_004G061700v3	192.517	1.0625	2.48385e-13	AT4G18820	AAA-type ATPase family protein
POPTR_013G065900v3	254.528	1.06224	3.19681e-19	AT5G17850	Sodium/calcium exchanger family protein
POPTR_018G025900v3	769.789	1.06189	9.18953e-21	NA	NA
POPTR_003G063300v3	306.071	1.06154	2.80338e-11	NA	NA
POPTR_005G175400v3	246.38	1.0615	9.82489e-14	NA	NA
POPTR_002G052300v3	3806.44	1.06148	6.02681e-15	NA	NA
POPTR_006G148901v3	112.874	1.06142	1.04861e-09	NA	NA
POPTR_015G102200v3	509.945	1.0612	1.89396e-13	AT3G48770	DNA binding;ATP binding
POPTR_004G041000v3	2585.3	1.05995	8.53311e-54
POPTR_001G190200v3	532.423	1.05892	5.05983e-19	NA	NA
POPTR_008G051600v3	1440.63	1.05887	6.51592e-21	AT5G65750	2-oxoglutarate dehydrogenase, E1 component
POPTR_013G083300v3	133.932	1.0582	1.0203e-06	AT3G10960	AZA-guanine resistant1
POPTR_015G027600v3	718.047	1.05731	1.13856e-23	AT4G25750	ABC-2 type transporter family protein
POPTR_004G178000v3	349.943	1.05417	5.76597e-22	AT1G31820	Amino acid permease family protein
POPTR_013G038100v3	727.558	1.0539	4.509e-39	NA	NA
POPTR_015G060000v3	2718.21	1.05373	2.10125e-40	AT5G60920	COBRA-like extracellular glycosyl-phosphatidyl inositol-anchored protein family
POPTR_001G006700v3	191.862	1.053	7.94559e-14	AT1G55320	acyl-activating enzyme 18
POPTR_003G072200v3	134.046	1.05297	3.0351e-11	NA	NA
POPTR_014G187300v3	222.367	1.05147	1.03392e-14	NA	NA
POPTR_015G135100v3	627.191	1.05142	9.53201e-28
POPTR_003G099600v3	110.141	1.05135	1.13706e-07	NA	NA
POPTR_014G117800v3	573.024	1.05122	2.40727e-27	NA	NA
POPTR_002G120100v3	3390.48	1.05089	3.65097e-31	AT2G23090	Uncharacterised protein family SERF
POPTR_002G187500v3	1450.78	1.05078	8.03654e-15	NA	NA
POPTR_004G108000v3	136.816	1.05022	2.99872e-11	AT5G15980	Pentatricopeptide repeat (PPR) superfamily protein
POPTR_002G097601v3	839.808	1.04946	8.43138e-34	NA	NA
POPTR_002G048000v3	330.217	1.04913	1.26524e-12	NA	NA
POPTR_006G255700v3	219.23	1.04905	1.30493e-10	AT4G32250	Protein kinase superfamily protein
POPTR_010G004400v3	385.816	1.04841	1.12288e-23
POPTR_006G239000v3	187.408	1.04808	6.82553e-13	NA	NA
POPTR_002G169300v3	149.872	1.04802	8.439e-10	AT4G01037	Ubiquitin carboxyl-terminal hydrolase family protein
POPTR_012G121900v3	263.905	1.04723	1.05133e-16	NA	NA
POPTR_004G006000v3	709.795	1.04711	2.59723e-22	AT4G04340	ERD (early-responsive to dehydration stress) family protein
POPTR_006G181100v3	133.144	1.04617	1.24749e-07	NA	NA
POPTR_004G112800v3	364.312	1.04576	6.06202e-20	AT3G47520	malate dehydrogenase
POPTR_015G114101v3	168.812	1.0448	8.87671e-10
POPTR_017G099200v3	542.577	1.04442	7.613e-27	AT5G15810	N2,N2-dimethylguanosine tRNA methyltransferase
POPTR_006G016200v3	3582.85	1.0442	5.08822e-14	AT4G17230	SCARECROW-like 13
POPTR_004G197400v3	8925.33	1.04374	1.30976e-47	AT3G20770	Ethylene insensitive 3 family protein
POPTR_005G157300v3	340.583	1.04199	1.55016e-09	NA	NA
POPTR_006G226100v3	263.297	1.04159	3.37363e-16	NA	NA
POPTR_013G085300v3	126.29	1.04113	5.2903e-09	AT1G65230	Uncharacterized conserved protein (DUF2358)
POPTR_017G112900v3	141.064	1.04076	8.80861e-09	AT5G38510	Rhomboid-related intramembrane serine protease family protein
POPTR_013G127800v3	956.841	1.04053	3.0247e-41	NA	NA
POPTR_012G042100v3	599.624	1.04053	5.3399e-27	NA	NA
POPTR_004G227000v3	778.53	1.0404	5.89762e-31	NA	NA
POPTR_002G100600v3	778.516	1.04031	8.13929e-28	NA	NA
POPTR_018G057100v3	112.045	1.03966	8.44843e-05	AT5G25930	Protein kinase family protein with leucine-rich repeat domain
POPTR_005G076500v3	691.95	1.03947	1.04171e-15	NA	NA
POPTR_003G031900v3	3495.72	1.03939	1.02818e-21	NA	NA
POPTR_009G054600v3	484.068	1.03929	8.38617e-10	AT4G34900	xanthine dehydrogenase 2
POPTR_003G200080v3	1148.95	1.03851	4.03601e-21
POPTR_001G464400v3	1351.21	1.03793	1.42126e-46	AT5G44340	tubulin beta chain 4
POPTR_003G198301v3	130.696	1.0376	1.71808e-09	NA	NA
POPTR_005G243400v3	104.174	1.03748	4.36899e-10	NA	NA
POPTR_009G053500v3	135.192	1.037	2.11764e-09
POPTR_014G024700v3	581.893	1.03696	5.47336e-18	NA	NA
POPTR_005G066300v3	119.359	1.03682	1.16958e-10	NA	NA
POPTR_004G207100v3	527.523	1.03587	0.00011118	AT4G35300	tonoplast monosaccharide transporter2
POPTR_001G033800v3	494.265	1.03579	2.25842e-13	NA	NA
POPTR_001G011900v3	2099.81	1.03422	2.62051e-14	AT3G07160	glucan synthase-like 10
POPTR_001G056700v3	445.757	1.03359	4.04016e-11	NA	NA
POPTR_001G007300v3	211.285	1.03331	2.67607e-13	AT3G13620	Amino acid permease family protein
POPTR_003G072800v3	1337.24	1.03302	2.08394e-40	NA	NA
POPTR_005G124000v3	374.515	1.03258	1.20563e-11	NA	NA
POPTR_003G173900v3	515.403	1.03196	1.31416e-31	NA	NA
POPTR_013G065500v3	257.483	1.03152	1.61299e-13	AT5G07610	F-box family protein
POPTR_005G015300v3	145.659	1.03013	3.3379e-08	NA	NA
POPTR_004G213400v3	798.941	1.02949	7.96249e-40	AT2G28000	chaperonin-60alpha
POPTR_017G044600v3	552.401	1.02946	4.91007e-25	AT5G64360	Chaperone DnaJ-domain superfamily protein
POPTR_016G062600v3	665.969	1.02821	5.21654e-18	NA	NA
POPTR_012G004000v3	142.096	1.02764	7.793e-09	NA	NA
POPTR_010G005600v3	191.597	1.02757	2.36976e-14	AT3G16810	pumilio 24
POPTR_002G028700v3	2109.53	1.0275	7.01088e-19	NA	NA
POPTR_002G248500v3	194.8	1.02722	1.06208e-12	NA	NA
POPTR_018G126000v3	211.596	1.02716	9.56585e-13	NA	NA
POPTR_006G189300v3	753.059	1.02681	2.16177e-39	NA	NA
POPTR_001G030750v3	407.291	1.02576	1.64016e-12	NA	NA
POPTR_012G131000v3	5361.88	1.02574	2.83354e-22	NA	NA
POPTR_007G071100v3	2656.44	1.02539	6.77821e-53	AT1G48920	nucleolin like 1
POPTR_001G228000v3	224.993	1.02479	1.95204e-15	AT1G04945	HIT-type Zinc finger family protein
POPTR_002G172700v3	247.952	1.02428	4.22142e-16	AT2G46520	cellular apoptosis susceptibility protein, putative / importin-alpha re-exporter, putative
POPTR_001G089100v3	286.957	1.02427	1.15146e-18	NA	NA
POPTR_003G189100v3	172.021	1.02412	4.66905e-15	NA	NA
POPTR_007G013000v3	446.588	1.02305	6.06165e-16	AT2G18020	Ribosomal protein L2 family
POPTR_012G016600v3	402.634	1.0221	8.67731e-14	NA	NA
POPTR_012G118500v3	879.811	1.02169	1.97861e-14	NA	NA
POPTR_011G161901v3	322.467	1.02149	1.91327e-08	NA	NA
POPTR_T126506v3	422.989	1.02145	8.23246e-13	AT3G14470	NB-ARC domain-containing disease resistance protein
POPTR_004G190900v3	1685.33	1.02106	8.99411e-36
POPTR_006G227600v3	1242.81	1.02093	3.07521e-19	NA	NA
POPTR_001G255800v3	319.081	1.02055	8.94726e-15	AT1G51500	ABC-2 type transporter family protein
POPTR_016G085300v3	189.358	1.01982	6.34094e-15	NA	NA
POPTR_016G112300v3	894.018	1.01864	1.1946e-38	NA	NA
POPTR_011G023800v3	317.538	1.01851	9.07377e-19	AT1G24290	AAA-type ATPase family protein
POPTR_009G075700v3	2063.75	1.01828	6.35586e-28	AT2G30110	ubiquitin-activating enzyme 1
POPTR_017G039100v3	880.791	1.01822	6.62864e-10	AT1G67120	ATPases;nucleotide binding;ATP binding;nucleoside-triphosphatases;transcription factor binding
POPTR_013G008300v3	1928.18	1.01793	4.51463e-47	NA	NA
POPTR_018G135600v3	101.451	1.01778	0.000661725	NA	NA
POPTR_006G254100v3	4071.07	1.01759	5.43384e-13	NA	NA
POPTR_014G165500v3	452.85	1.01698	8.64731e-22	NA	NA
POPTR_017G050800v3	1048.4	1.0166	9.239e-24	AT5G64270	splicing factor, putative
POPTR_018G032500v3	520.56	1.01652	4.73328e-21	AT5G11330	FAD/NAD(P)-binding oxidoreductase family protein
POPTR_004G170300v3	204.437	1.01626	5.01917e-08
POPTR_006G043400v3	229.382	1.01625	1.56872e-12	AT2G41370	Ankyrin repeat family protein / BTB/POZ domain-containing protein
POPTR_001G088400v3	112.675	1.01617	1.18082e-08	NA	NA
POPTR_013G002200v3	155.345	1.01594	2.07839e-10	NA	NA
POPTR_013G029700v3	820.369	1.0159	1.15737e-13	NA	NA
POPTR_010G042500v3	112.449	1.01579	4.01922e-07	NA	NA
POPTR_006G136700v3	20520.9	1.01507	1.0718e-111	NA	NA
POPTR_010G071200v3	2554.79	1.01492	3.50184e-23	AT1G04400	cryptochrome 2
POPTR_008G068400v3	914.195	1.01472	1.51853e-20	AT3G55940	Phosphoinositide-specific phospholipase C family protein
POPTR_017G039200v3	323.698	1.01373	6.19916e-12
POPTR_008G181900v3	624.45	1.01297	6.17556e-19	AT1G67740	photosystem II BY
POPTR_017G114600v3	2237.42	1.01281	0.00119475	AT5G38410	Ribulose bisphosphate carboxylase (small chain) family protein
POPTR_017G059400v3	5627.1	1.01255	1.3531e-36	AT3G23810	S-adenosyl-l-homocysteine (SAH) hydrolase 2
POPTR_016G059500v3	222.136	1.01171	8.64162e-11	NA	NA
POPTR_006G008300v3	104.616	1.01131	1.01774e-07
POPTR_002G230600v3	259.53	1.01029	1.73067e-07	NA	NA
POPTR_010G160100v3	196.132	1.0095	4.67959e-12	AT1G69310	WRKY DNA-binding protein 57
POPTR_011G102100v3	113.605	1.00933	7.41594e-06	NA	NA
POPTR_010G060300v3	151.931	1.00906	2.19949e-06	AT1G60420	DC1 domain-containing protein
POPTR_016G001450v3	133.894	1.00892	1.59491e-08
POPTR_012G135700v3	462.68	1.00882	1.34161e-28	NA	NA
POPTR_009G131200v3	846.827	1.00868	6.31295e-27	AT2G16640	multimeric translocon complex in the outer envelope membrane 132
POPTR_001G097600v3	690.423	1.00853	1.80131e-26	NA	NA
POPTR_007G046700v3	1007.82	1.00678	2.03055e-20
POPTR_003G137100v3	309.564	1.00662	3.17692e-10	NA	NA
POPTR_006G271400v3	174.039	1.00625	1.26478e-06	AT1G63150	Tetratricopeptide repeat (TPR)-like superfamily protein
POPTR_008G193800v3	211.017	1.0062	2.70855e-14	AT1G59990	DEA(D/H)-box RNA helicase family protein
POPTR_012G070900v3	1457.78	1.00594	4.1647e-38	NA	NA
POPTR_010G169800v3	438.564	1.00536	5.59141e-24	AT4G27640	ARM repeat superfamily protein
POPTR_005G015100v3	3736.81	1.00468	7.14049e-49	NA	NA
POPTR_003G207802v3	115.096	1.00446	9.18151e-08	AT4G31980	(1 of 1) PF03140//PF05903 - Plant protein of unknown function (DUF247) // PPPDE putative peptidase domain (Peptidase_C97)
POPTR_003G015500v3	263.885	1.00397	1.70233e-07	NA	NA
POPTR_016G109600v3	121.5	1.00349	3.95752e-08	NA	NA
POPTR_006G134600v3	297.372	1.00335	2.31406e-17	NA	NA
POPTR_004G170400v3	165.901	1.00328	1.26076e-10
POPTR_002G010100v3	1975.15	1.00308	7.23571e-34	NA	NA
POPTR_008G071300v3	184.049	1.00286	5.4811e-13	AT3G11100	sequence-specific DNA binding transcription factors
POPTR_012G122900v3	342.823	1.00232	7.88699e-11	NA	NA
POPTR_006G222800v3	2215.08	1.00223	1.18551e-30	NA	NA
POPTR_005G077300v3	3643.06	1.00198	5.46684e-33	NA	NA
POPTR_006G073100v3	255.73	1.00186	1.29286e-12	AT5G57120	(1 of 1) PTHR23216 - NUCLEOLAR AND COILED-BODY PHOSPHOPROTEIN 1
POPTR_019G082500v3	349.971	1.00161	3.97851e-20	NA	NA
POPTR_011G109700v3	433.542	1.00136	3.93841e-21	NA	NA
POPTR_019G032600v3	110.422	1.00088	3.21614e-09	NA	NA
POPTR_004G222000v3	101.92	1.00008	2.31112e-06	NA	NA
POPTR_003G140600v3	1520.6	-1.001	1.17256e-19	NA	NA
POPTR_004G217800v3	5355.52	-1.00101	1.33169e-32	NA	NA
POPTR_001G377900v3	525.592	-1.00238	2.13883e-14	NA	NA
POPTR_014G082300v3	188.487	-1.00393	4.79558e-11	AT2G45860
POPTR_010G156900v3	104.159	-1.00401	4.4386e-08	AT1G26340	cytochrome B5 isoform A
POPTR_017G084600v3	670.564	-1.00406	2.04766e-21	AT3G47500	cycling DOF factor 3
POPTR_013G078500v3	590.164	-1.00562	6.31466e-18	AT4G17900	PLATZ transcription factor family protein
POPTR_008G104500v3	109.5	-1.00679	9.86501e-07	AT4G16210	enoyl-CoA hydratase/isomerase A
POPTR_006G018500v3	126.128	-1.00776	2.35159e-06
POPTR_014G041200v3	773.957	-1.00821	1.9727e-22	AT1G19330	(1 of 2) PTHR13286 - SAP30
POPTR_006G282200v3	100.956	-1.00828	5.17978e-08
POPTR_002G117800v3	156.635	-1.00846	1.72773e-08
POPTR_004G036500v3	189.943	-1.00926	2.80338e-11	AT4G21620	glycine-rich protein
POPTR_005G244500v3	1595.24	-1.00945	1.26405e-22	NA	NA
POPTR_001G204600v3	326.197	-1.00956	5.89616e-18	AT1G80520	Sterile alpha motif (SAM) domain-containing protein
POPTR_010G108700v3	188.228	-1.00965	4.12911e-09	AT1G23220	Dynein light chain type 1 family protein
POPTR_007G126800v3	219.038	-1.01081	3.00534e-09	AT2G43330	inositol transporter 1
POPTR_019G043000v3	198.851	-1.01092	7.8489e-13	NA	NA
POPTR_009G039700v3	109.484	-1.01137	5.45286e-07	AT5G59000	RING/FYVE/PHD zinc finger superfamily protein
POPTR_016G065000v3	125.102	-1.01162	2.55708e-10	NA	NA
POPTR_009G162900v3	394.875	-1.0122	2.34455e-19	AT5G22400	Rho GTPase activating protein with PAK-box/P21-Rho-binding domain
POPTR_016G058600v3	108.232	-1.0124	7.57163e-07	NA	NA
POPTR_005G065200v3	417.533	-1.01277	8.88653e-18	NA	NA
POPTR_002G104700v3	101.542	-1.01308	6.73626e-07	NA	NA
POPTR_006G121801v3	503.625	-1.0149	4.15532e-18	AT5G22920	CHY-type/CTCHY-type/RING-type Zinc finger protein
POPTR_005G101800v3	1158.23	-1.01524	1.23464e-29	NA	NA
POPTR_006G170700v3	1359.4	-1.01531	1.88284e-30	NA	NA
POPTR_002G113800v3	226.423	-1.0155	8.74083e-11	NA	NA
POPTR_014G121900v3	135.277	-1.0155	7.25431e-07	NA	NA
POPTR_004G086900v3	862.448	-1.01677	9.12361e-17	AT5G37710	alpha/beta-Hydrolases superfamily protein
POPTR_010G029100v3	301.026	-1.01752	1.03018e-14	AT5G35630	glutamine synthetase 2
POPTR_018G086500v3	815.547	-1.01766	2.88363e-17	AT4G29110	(1 of 4) PTHR33265:SF8 - F5F19.20 PROTEIN
POPTR_009G142150v3	260.937	-1.01784	3.16634e-14
POPTR_001G360100v3	394.95	-1.01812	3.36877e-18	AT5G55400	Actin binding Calponin homology (CH) domain-containing protein
POPTR_001G452000v3	127.469	-1.01852	0.000472784
POPTR_012G065750v3	1004.24	-1.01856	3.24825e-26	NA	NA
POPTR_001G137700v3	468.964	-1.01944	4.41031e-17	NA	NA
POPTR_006G139100v3	496.886	-1.02029	4.68932e-16	NA	NA
POPTR_001G192700v3	384.208	-1.02072	7.6659e-24	NA	NA
POPTR_007G075400v3	272.654	-1.02079	3.59881e-10	AT3G19970	alpha/beta-Hydrolases superfamily protein
POPTR_014G162900v3	593.591	-1.02149	1.69497e-26	NA	NA
POPTR_003G078300v3	450.169	-1.02163	2.78738e-25	NA	NA
POPTR_007G040100v3	176.283	-1.02207	3.97522e-09
POPTR_015G056100v3	134.206	-1.02289	8.68935e-07
POPTR_006G115300v3	513.133	-1.02332	2.84318e-23	AT5G03670	(1 of 24) PF14309 - Domain of unknown function (DUF4378) (DUF4378)
POPTR_001G248100v3	3189.46	-1.02342	9.0509e-78	AT1G07350	RNA-binding (RRM/RBD/RNP motifs) family protein
POPTR_010G058000v3	474.373	-1.02357	8.52042e-21	AT1G67530	ARM repeat superfamily protein
POPTR_012G078300v3	301.105	-1.0247	4.28554e-14	NA	NA
POPTR_002G125400v3	367.912	-1.02629	2.09238e-17	AT1G45249	abscisic acid responsive elements-binding factor 2
POPTR_008G092000v3	6644.09	-1.02777	2.45821e-36	AT1G13950	eukaryotic elongation factor 5A-1
POPTR_014G023000v3	658.258	-1.02967	3.07064e-24	NA	NA
POPTR_009G027000v3	269.157	-1.03073	6.51906e-14	AT3G55280	ribosomal protein L23AB
POPTR_004G069200v3	267.78	-1.03088	6.7087e-11	AT1G48370	YELLOW STRIPE like 8
POPTR_006G115100v3	4905.53	-1.03169	7.70458e-21	AT5G03650	starch branching enzyme 2.2
POPTR_010G124400v3	1008.57	-1.03173	3.534e-27	AT1G68490	(1 of 5) 1.1.1.85 - 3-isopropylmalate dehydrogenase / IMDH
POPTR_001G092900v3	216.083	-1.03199	7.62268e-05	NA	NA
POPTR_008G149500v3	110.202	-1.03203	9.15496e-08	AT3G06030	NPK1-related protein kinase 3
POPTR_011G084300v3	163.759	-1.0323	5.46963e-10	NA	NA
POPTR_014G044500v3	207.532	-1.03252	1.49498e-10	AT1G02180	ferredoxin-related
POPTR_009G072500v3	427.246	-1.03269	4.5956e-13	AT5G48870	Small nuclear ribonucleoprotein family protein
POPTR_006G101100v3	520.223	-1.03319	2.32209e-14
POPTR_015G057800v3	2506.8	-1.03331	7.18284e-26	AT1G18650	plasmodesmata callose-binding protein 3
POPTR_002G225600v3	374.779	-1.03348	9.44357e-17	NA	NA
POPTR_001G146200v3	4300.52	-1.03349	4.06349e-54	NA	NA
POPTR_007G062061v3	3120.54	-1.0339	1.38356e-16
POPTR_012G077400v3	1016.65	-1.03393	1.37436e-21	NA	NA
POPTR_008G158901v3	206.424	-1.03398	1.54932e-12
POPTR_002G193400v3	154.279	-1.03445	9.09108e-08	NA	NA
POPTR_001G325100v3	2767.22	-1.03462	1.17764e-06
POPTR_006G189600v3	199.014	-1.0349	2.50914e-08	NA	NA
POPTR_017G000400v3	146.576	-1.03513	4.09736e-11	NA	NA
POPTR_005G024500v3	2241.97	-1.03524	3.47877e-28	NA	NA
POPTR_011G145600v3	1090.89	-1.03631	1.57877e-22	NA	NA
POPTR_010G201700v3	186.659	-1.0377	1.41498e-09	AT2G39705	ROTUNDIFOLIA like 8
POPTR_009G146700v3	148.37	-1.03839	1.63618e-11
POPTR_018G115400v3	368.528	-1.03922	1.22597e-14	NA	NA
POPTR_018G110450v3	104.138	-1.03926	2.57176e-06	NA	NA
POPTR_014G167400v3	289.614	-1.03982	1.26299e-12	NA	NA
POPTR_012G108400v3	3682.26	-1.0402	2.33123e-16	NA	NA
POPTR_018G047300v3	753.519	-1.0411	0.00190901
POPTR_004G160100v3	259.78	-1.04126	5.10352e-15	AT2G16430	purple acid phosphatase 10
POPTR_002G018600v3	349.58	-1.04133	7.44603e-18	NA	NA
POPTR_006G229900v3	219.45	-1.04138	1.22851e-13	NA	NA
POPTR_001G266000v3	315.577	-1.04157	4.39569e-16
POPTR_001G397800v3	123.673	-1.04209	4.00123e-09	NA	NA
POPTR_018G036900v3	2167.61	-1.04233	1.83256e-18	AT1G15250	Zinc-binding ribosomal protein family protein
POPTR_010G231300v3	787.343	-1.04279	1.96119e-16	AT2G37470	Histone superfamily protein
POPTR_019G037300v3	440.333	-1.04339	3.95419e-21	NA	NA
POPTR_014G115600v3	1177.66	-1.04425	3.70315e-39	NA	NA
POPTR_016G142900v3	7252.99	-1.04469	2.08152e-60	NA	NA
POPTR_011G052900v3	446.513	-1.04501	4.44489e-15	NA	NA
POPTR_006G076300v3	138.813	-1.04526	1.27496e-10	AT5G57230	Thioredoxin superfamily protein
POPTR_006G124800v3	15971.3	-1.04559	7.26553e-89	NA	NA
POPTR_010G088600v3	110.049	-1.04671	1.48891e-07	AT2G32120	heat-shock protein 70T-2
POPTR_019G127900v3	265.9	-1.04747	3.90389e-10	NA	NA
POPTR_002G242500v3	147.39	-1.04765	2.60103e-12	NA	NA
POPTR_003G116450v3	112.148	-1.0479	1.01472e-07	NA	NA
POPTR_019G090500v3	688.691	-1.04802	2.26098e-15	NA	NA
POPTR_016G034100v3	137.974	-1.04861	1.01888e-10	NA	NA
POPTR_010G101500v3	137.61	-1.04937	4.13887e-07	AT2G01913
POPTR_007G077000v3	168.852	-1.04947	2.12584e-08
POPTR_017G146600v3	314.49	-1.04963	9.95719e-15	NA	NA
POPTR_014G123400v3	578.045	-1.05115	2.36636e-08	NA	NA
POPTR_015G084700v3	2196.83	-1.0516	7.71882e-23	AT5G56670	Ribosomal protein S30 family protein
POPTR_010G182800v3	1467.31	-1.05186	2.87672e-19
POPTR_011G140300v3	116.598	-1.05221	7.29931e-09	NA	NA
POPTR_001G269400v3	3712.91	-1.05231	2.58977e-43	AT3G12630	A20/AN1-like zinc finger family protein
POPTR_006G111700v3	271.554	-1.05245	6.50488e-15	AT3G08600	Protein of unknown function (DUF1191)
POPTR_003G136500v3	177.405	-1.05251	1.84009e-10	NA	NA
POPTR_005G236700v3	226.79	-1.05308	6.62696e-10	NA	NA
POPTR_002G188600v3	817.945	-1.05309	7.0893e-10	NA	NA
POPTR_019G038550v3	173.764	-1.05312	8.78569e-10	NA	NA
POPTR_008G013200v3	3902.43	-1.05376	3.56321e-28	AT3G10090	Nucleic acid-binding, OB-fold-like protein
POPTR_001G110800v3	2152.77	-1.0539	1.53047e-28	NA	NA
POPTR_006G082900v3	266.068	-1.05402	1.86001e-13	AT2G37420	ATP binding microtubule motor family protein
POPTR_010G173500v3	128.677	-1.05468	1.52038e-05	AT1G79480	Carbohydrate-binding X8 domain superfamily protein
POPTR_001G384000v3	606.774	-1.05538	1.572e-26	NA	NA
POPTR_016G106800v3	415.673	-1.05571	1.54934e-16	NA	NA
POPTR_008G019200v3	172.224	-1.0558	2.74293e-11	AT2G38710	AMMECR1 family
POPTR_002G020900v3	2189.79	-1.05594	1.3721e-34	NA	NA
POPTR_002G003100v3	17469.9	-1.05598	1.9541e-36	NA	NA
POPTR_018G119600v3	490.289	-1.05625	3.98097e-17	NA	NA
POPTR_003G170300v3	395.784	-1.05699	4.49173e-16	NA	NA
POPTR_017G000700v3	157.072	-1.05711	0.000188425	NA	NA
POPTR_016G063100v3	1454.42	-1.05716	1.37867e-13	NA	NA
POPTR_005G053800v3	1289.42	-1.05726	1.23031e-19	NA	NA
POPTR_009G119500v3	3538.21	-1.05781	4.13642e-35	AT4G39170	Sec14p-like phosphatidylinositol transfer family protein
POPTR_017G082200v3	1390.54	-1.05919	1.04473e-21	AT1G69620	ribosomal protein L34
POPTR_001G379400v3	105.273	-1.05957	7.64841e-08	NA	NA
POPTR_004G135300v3	4453.95	-1.06021	1.54909e-43	AT4G15093	catalytic LigB subunit of aromatic ring-opening dioxygenase family
POPTR_006G223900v3	944.901	-1.06276	8.49654e-20	NA	NA
POPTR_013G045800v3	105.739	-1.06298	2.32036e-09	NA	NA
POPTR_018G022100v3	1081.54	-1.06327	2.49682e-18	NA	NA
POPTR_008G004700v3	112.738	-1.06329	1.04267e-09	NA	NA
POPTR_004G153200v3	218.898	-1.06343	6.83304e-13	AT1G49310	(1 of 1) PF10950 - Protein of unknown function (DUF2775) (DUF2775)
POPTR_008G188800v3	3274.78	-1.06443	5.37509e-29	AT1G60800	NSP-interacting kinase 3
POPTR_001G265900v3	120.803	-1.06606	2.96015e-07	AT3G63520	carotenoid cleavage dioxygenase 1
POPTR_004G018500v3	171.606	-1.06766	8.37436e-12
POPTR_004G156200v3	1997.94	-1.06776	1.50005e-35	AT2G21620	Adenine nucleotide alpha hydrolases-like superfamily protein
POPTR_017G114700v3	1377.56	-1.07084	2.79145e-40	AT5G16110
POPTR_013G017500v3	211.303	-1.07086	1.02327e-13	NA	NA
POPTR_002G021500v3	4178.42	-1.07172	1.12965e-21	NA	NA
POPTR_005G032300v3	205.05	-1.0727	4.90695e-14	NA	NA
POPTR_008G104300v3	352.678	-1.07369	1.48851e-19	AT3G17090	Protein phosphatase 2C family protein
POPTR_009G066100v3	5118.31	-1.07443	5.86997e-14	AT3G45640	mitogen-activated protein kinase 3
POPTR_012G101800v3	267.68	-1.07465	2.34841e-12	NA	NA
POPTR_006G072400v3	326.346	-1.07483	3.35142e-07
POPTR_015G057300v3	120.639	-1.07518	9.7606e-07	AT5G61000	Replication factor-A protein 1-related
POPTR_005G251600v3	3479.23	-1.07585	7.75429e-30	NA	NA
POPTR_018G139300v3	739.358	-1.07605	2.28545e-18	NA	NA
POPTR_018G007300v3	1116.41	-1.07614	5.68389e-34	NA	NA
POPTR_006G097500v3	652.791	-1.0767	5.93593e-11	AT5G01210	HXXXD-type acyl-transferase family protein
POPTR_002G081300v3	1587.88	-1.07794	3.96651e-17	NA	NA
POPTR_009G115500v3	1151.47	-1.07838	6.26551e-46	AT4G34490	cyclase associated protein 1
POPTR_015G026200v3	125.378	-1.07849	2.15961e-08	AT3G57350	Nucleoporin interacting component (Nup93/Nic96-like) family protein
POPTR_012G054300v3	201.727	-1.07891	4.43721e-12	NA	NA
POPTR_014G012200v3	244.101	-1.07984	4.80335e-09	NA	NA
POPTR_010G147400v3	1261.76	-1.07987	1.06946e-43	AT3G17100	sequence-specific DNA binding transcription factors
POPTR_006G008200v3	221.611	-1.08	7.10784e-13
POPTR_014G123800v3	266.229	-1.08034	1.15625e-14	NA	NA
POPTR_009G099200v3	114.338	-1.08227	1.29099e-05	AT4G34120	Cystathionine beta-synthase (CBS) family protein
POPTR_008G070950v3	2891.07	-1.08244	3.01799e-19
POPTR_003G038800v3	130.84	-1.0826	1.11355e-07
POPTR_004G216100v3	670.958	-1.08322	5.62033e-17	NA	NA
POPTR_010G123400v3	1999.56	-1.08349	2.95743e-32
POPTR_001G086000v3	120.568	-1.08435	2.82137e-07	NA	NA
POPTR_001G122400v3	1436.57	-1.08445	2.02625e-31	NA	NA
POPTR_005G166100v3	112.272	-1.08478	1.55014e-05	NA	NA
POPTR_008G151300v3	540.331	-1.085	8.77166e-15	AT4G14950	SNARE associated Golgi protein family
POPTR_004G184300v3	3781.3	-1.08555	1.27495e-24	AT2G27580	A20/AN1-like zinc finger family protein
POPTR_016G016700v3	370.989	-1.0857	5.59112e-11	NA	NA
POPTR_001G388900v3	11906.4	-1.08584	2.03318e-05	NA	NA
POPTR_004G151200v3	160.267	-1.08598	2.43065e-12
POPTR_002G090300v3	280.438	-1.08662	2.30708e-16	NA	NA
POPTR_008G055900v3	3769.52	-1.0867	2.66179e-05	AT3G55430	O-Glycosyl hydrolases family 17 protein
POPTR_002G025200v3	644.925	-1.08778	1.25933e-18	NA	NA
POPTR_013G047200v3	218.771	-1.08836	7.17449e-12	NA	NA
POPTR_010G107000v3	117.713	-1.08938	8.90677e-07	AT2G34930	disease resistance family protein / LRR family protein
POPTR_006G131400v3	269.764	-1.09015	3.52486e-14	NA	NA
POPTR_004G179628v3	184.943	-1.09054	2.86554e-09	AT4G38460	geranylgeranyl reductase
POPTR_006G236500v3	174.514	-1.09092	1.32516e-12	NA	NA
POPTR_001G243100v3	103.401	-1.0913	5.43677e-09	AT1G76440	HSP20-like chaperones superfamily protein
POPTR_009G064000v3	402.713	-1.09221	3.40971e-18	AT2G03870	Small nuclear ribonucleoprotein family protein
POPTR_006G019300v3	890.324	-1.09235	2.3178e-27	AT4G16380	Heavy metal transport/detoxification superfamily protein
POPTR_001G115600v3	414.609	-1.09259	4.56097e-21	NA	NA
POPTR_013G076400v3	237.845	-1.09276	9.41772e-16	AT1G09815	polymerase delta 4
POPTR_004G001800v3	195.417	-1.09277	6.16728e-08	AT1G62422	(1 of 2) PTHR31903:SF6 - F12F1.11-RELATED
POPTR_001G334600v3	2119.05	-1.09317	1.0755e-20	AT1G64750	deletion of SUV3 suppressor 1(I)
POPTR_008G120900v3	840.594	-1.09362	3.13809e-23	AT1G13380	Protein of unknown function (DUF1218)
POPTR_007G020500v3	114.908	-1.09378	1.78891e-07	AT2G18190	P-loop containing nucleoside triphosphate hydrolases superfamily protein
POPTR_001G043100v3	5014.08	-1.09488	2.1165e-23	NA	NA
POPTR_017G083200v3	192.119	-1.09581	7.38073e-09	AT5G48600	structural maintenance of chromosome 3
POPTR_001G145700v3	125.947	-1.09588	3.47446e-08	NA	NA
POPTR_016G014900v3	315.449	-1.09615	3.38238e-13	NA	NA
POPTR_010G134100v3	3350.94	-1.09647	5.224e-46	AT3G25560	NSP-interacting kinase 2
POPTR_014G050532v3	230.876	-1.09656	0.00279254	AT4G13266	(1 of 41) PF13962 - Domain of unknown function (PGG)
POPTR_005G249700v3	1872.08	-1.097	2.21896e-36	NA	NA
POPTR_006G161538v3	214.764	-1.0974	1.05195e-08	NA	NA
POPTR_018G030200v3	117.309	-1.0976	4.11252e-09	AT3G15650	alpha/beta-Hydrolases superfamily protein
POPTR_018G017100v3	339.898	-1.09909	9.59845e-22	NA	NA
POPTR_004G069001v3	297.802	-1.10053	1.3992e-22	AT5G20480	EF-TU receptor
POPTR_019G085400v3	643.785	-1.10088	3.5836e-20	NA	NA
POPTR_001G469600v3	757.424	-1.10372	4.61386e-17	AT3G13310	Chaperone DnaJ-domain superfamily protein
POPTR_002G103900v3	168.769	-1.1047	9.40026e-12	NA	NA
POPTR_011G142700v3	386.983	-1.10475	1.74217e-21	NA	NA
POPTR_010G115500v3	2004.93	-1.10506	1.24423e-47	AT1G71110
POPTR_015G140800v3	484.519	-1.10525	3.78114e-20
POPTR_008G154600v3	4680.85	-1.10532	1.19244e-79	AT3G22550	Protein of unknown function (DUF581)
POPTR_011G071800v3	291.279	-1.10651	1.44317e-18	NA	NA
POPTR_003G053100v3	872.072	-1.10719	2.07277e-24	AT1G15250	Zinc-binding ribosomal protein family protein
POPTR_005G045100v3	521.023	-1.10755	1.46455e-09	NA	NA
POPTR_003G109200v3	332.913	-1.10778	2.02745e-14	NA	NA
POPTR_014G133500v3	1223.01	-1.10915	5.36052e-32	NA	NA
POPTR_005G200300v3	224.554	-1.10919	4.41752e-11	NA	NA
POPTR_008G121000v3	174.745	-1.1094	1.27801e-12	AT1G68490	(1 of 5) 1.1.1.85 - 3-isopropylmalate dehydrogenase / IMDH
POPTR_005G116600v3	4461.49	-1.11	8.33111e-20	NA	NA
POPTR_013G040100v3	462.637	-1.11044	5.67886e-19	NA	NA
POPTR_013G152400v3	5716.79	-1.11048	5.09282e-42	NA	NA
POPTR_018G019800v3	2415.35	-1.11063	1.65535e-05	NA	NA
POPTR_017G113501v3	267.748	-1.11109	1.48845e-13
POPTR_005G203800v3	275.325	-1.11148	1.29021e-14	NA	NA
POPTR_012G111000v3	109.608	-1.11189	6.30019e-06	NA	NA
POPTR_003G071800v3	1393.77	-1.11223	1.18567e-41	NA	NA
POPTR_018G014234v3	338.137	-1.1127	1.95091e-16	NA	NA
POPTR_013G025300v3	312.944	-1.11312	5.76213e-19	NA	NA
POPTR_001G102300v3	1022.36	-1.11383	1.5927e-15	NA	NA
POPTR_002G179800v3	191.76	-1.11418	1.15752e-12	NA	NA
POPTR_001G452400v3	1268.24	-1.11496	1.21862e-22	AT2G18196	Heavy metal transport/detoxification superfamily protein
POPTR_014G121000v3	164.43	-1.11511	3.43119e-10	NA	NA
POPTR_009G058500v3	429.777	-1.11567	1.05796e-18
POPTR_015G076400v3	2418.91	-1.11674	5.07739e-22
POPTR_002G152200v3	199.714	-1.11714	1.40561e-16	AT2G45680	TCP family transcription factor
POPTR_008G068800v3	151.71	-1.11717	2.14649e-13	AT3G55960	Haloacid dehalogenase-like hydrolase (HAD) superfamily protein
POPTR_015G098900v3	244.922	-1.11778	2.42918e-13	AT5G50670	Squamosa promoter-binding protein-like (SBP domain) transcription factor family protein
POPTR_007G062302v3	376.41	-1.11886	3.30897e-19	ATMG00520	Intron maturase, type II family protein
POPTR_011G149100v3	1541.59	-1.11915	7.29774e-29	NA	NA
POPTR_009G045400v3	932.521	-1.11939	8.51495e-27	AT3G47160	RING/U-box superfamily protein
POPTR_005G184900v3	618.536	-1.12005	2.74061e-25	NA	NA
POPTR_001G379800v3	1459.29	-1.12033	5.82191e-24	NA	NA
POPTR_019G083000v3	457.143	-1.1207	4.44344e-23	NA	NA
POPTR_005G082200v3	217.367	-1.12081	4.67815e-15	NA	NA
POPTR_008G162800v3	207.907	-1.12112	5.7686e-16	AT3G23090	TPX2 (targeting protein for Xklp2) protein family
POPTR_014G090601v3	255.144	-1.12196	3.12229e-11
POPTR_010G081100v3	379.473	-1.1221	7.53792e-11	AT3G22910	ATPase E1-E2 type family protein / haloacid dehalogenase-like hydrolase family protein
POPTR_019G095866v3	220.701	-1.12218	1.71384e-09	NA	NA
POPTR_004G206300v3	136.823	-1.12229	3.09479e-13	AT4G38260	Protein of unknown function (DUF833)
POPTR_008G101500v3	1510.2	-1.12256	2.24857e-44	AT3G06500	Plant neutral invertase family protein
POPTR_003G155000v3	392.171	-1.12265	7.28936e-15	NA	NA
POPTR_001G304200v3	836.978	-1.12402	3.7413e-26
POPTR_012G001400v3	367.711	-1.12476	1.34863e-12	NA	NA
POPTR_002G123400v3	138.812	-1.12549	8.53424e-12	AT5G47830
POPTR_002G228200v3	123.137	-1.12583	5.35895e-07	NA	NA
POPTR_019G031600v3	370.393	-1.12646	1.9839e-14	NA	NA
POPTR_002G129800v3	298.334	-1.12662	6.46064e-17	NA	NA
POPTR_011G067800v3	207.957	-1.12743	9.50849e-12	NA	NA
POPTR_001G105200v3	1519.53	-1.12809	6.01666e-41	NA	NA
POPTR_008G097900v3	235.875	-1.12874	6.51448e-12	AT1G69170	Squamosa promoter-binding protein-like (SBP domain) transcription factor family protein
POPTR_006G251300v3	163.803	-1.1288	7.26485e-10	NA	NA
POPTR_002G249200v3	1221.5	-1.12945	3.71758e-45	NA	NA
POPTR_002G036400v3	317.679	-1.12984	6.99712e-19	NA	NA
POPTR_005G218900v3	722.299	-1.12998	1.91317e-22	NA	NA
POPTR_004G140600v3	2032.28	-1.13038	4.31442e-48	AT1G49720	abscisic acid responsive element-binding factor 1
POPTR_008G062200v3	454.608	-1.13086	8.75592e-27	AT3G54000
POPTR_004G040600v3	453.927	-1.13092	2.77272e-21
POPTR_007G038100v3	606.505	-1.13097	4.71198e-19
POPTR_006G266800v3	179.086	-1.13135	7.88069e-14	AT2G24860	DnaJ/Hsp40 cysteine-rich domain superfamily protein
POPTR_014G097100v3	1995.78	-1.13264	9.84587e-30	AT4G01026	PYR1-like 7
POPTR_003G084100v3	672.898	-1.13268	1.33217e-44	NA	NA
POPTR_005G214000v3	556.013	-1.13437	1.64441e-18	NA	NA
POPTR_010G148200v3	1471.72	-1.13502	1.36447e-44	AT3G17120	(1 of 3) PTHR34188:SF1 - T6A9.7 PROTEIN
POPTR_010G004000v3	367.338	-1.13551	7.63964e-16	AT3G17580	(1 of 2) PTHR33181:SF10 - GENOMIC DNA, CHROMOSOME 3, P1 CLONE: MKP6
POPTR_007G062562v3	439.995	-1.1362	1.38419e-12
POPTR_007G138800v3	147.833	-1.13684	1.13174e-09	NA	NA
POPTR_015G127200v3	131.636	-1.13735	3.91213e-10	AT5G51480	SKU5 similar 2
POPTR_011G078500v3	216.757	-1.13772	5.44633e-13	NA	NA
POPTR_008G164801v3	356.762	-1.13834	6.92967e-15	AT3G23170
POPTR_005G170700v3	197.41	-1.13915	5.03637e-12	NA	NA
POPTR_013G081600v3	455.748	-1.1399	5.68121e-31	AT3G03130
POPTR_002G120700v3	397.298	-1.13991	5.97307e-20	AT4G24220	NAD(P)-binding Rossmann-fold superfamily protein
POPTR_015G142600v3	557.846	-1.14	1.08728e-28	AT3G22950	ADP-ribosylation factor C1
POPTR_008G053500v3	262.326	-1.14237	2.02009e-17	AT3G55390	Uncharacterised protein family (UPF0497)
POPTR_013G013800v3	5982.52	-1.14254	2.04936e-29	NA	NA
POPTR_008G032600v3	221.601	-1.14336	1.14685e-11	AT3G10440	Shugoshin C terminus
POPTR_001G408300v3	2073.6	-1.14462	6.67432e-28	NA	NA
POPTR_009G093900v3	674.48	-1.1452	2.06246e-25	AT4G34260	1,2-alpha-L-fucosidases
POPTR_002G162600v3	3352.37	-1.14583	3.0151e-54	AT2G46080	(1 of 4) PTHR31509:SF3 - BYPASS1-RELATED PROTEIN-RELATED
POPTR_011G117500v3	577.057	-1.14609	2.75915e-29	NA	NA
POPTR_015G013400v3	1676.85	-1.14706	6.53943e-47	AT5G24260	prolyl oligopeptidase family protein
POPTR_001G084000v3	2342.48	-1.14961	6.04411e-22	NA	NA
POPTR_010G108000v3	1742.89	-1.15019	1.32361e-27	AT3G03160	(1 of 2) PTHR12701:SF12 - GB
POPTR_008G108600v3	102.957	-1.15034	5.19576e-07	AT3G05750	(1 of 4) PTHR21726:SF29 - F1O19.10 PROTEIN
POPTR_018G079800v3	1606.26	-1.15058	2.66246e-36
POPTR_014G089700v3	3675.64	-1.15075	8.36885e-44	AT1G01490	Heavy metal transport/detoxification superfamily protein
POPTR_016G085900v3	405.368	-1.15109	6.69178e-19	NA	NA
POPTR_002G106566v3	113.843	-1.15112	3.17418e-10	NA	NA
POPTR_008G214500v3	133.813	-1.15238	3.2426e-10	NA	NA
POPTR_018G098000v3	2489.57	-1.15256	1.34409e-44	AT4G30370	RING/U-box superfamily protein
POPTR_018G053900v3	271.391	-1.153	5.88092e-19	AT2G26070	Protein of unknown function (DUF778)
POPTR_017G120800v3	118.976	-1.15333	5.69159e-11	AT3G03420	Ku70-binding family protein
POPTR_016G013000v3	10066.6	-1.15336	1.70224e-29	NA	NA
POPTR_005G115901v3	134.568	-1.15399	6.53742e-11	NA	NA
POPTR_004G031600v3	208.05	-1.15437	2.90149e-15	AT4G05190	kinesin 5
POPTR_005G075900v3	2933.91	-1.15477	5.72064e-47	NA	NA
POPTR_002G129600v3	152.199	-1.15544	5.09514e-11	NA	NA
POPTR_005G040800v3	813.514	-1.15562	1.26483e-18	NA	NA
POPTR_009G105400v3	248.322	-1.15647	1.19719e-10	AT2G15760	Protein of unknown function (DUF1645)
POPTR_017G029100v3	206.55	-1.15665	1.16695e-14	AT3G59470	Far-red impaired responsive (FAR1) family protein
POPTR_009G089400v3	2401.13	-1.15668	1.27387e-14	AT3G19580	zinc-finger protein 2
POPTR_004G005900v3	994.603	-1.15722	6.80445e-25	AT4G04340	ERD (early-responsive to dehydration stress) family protein
POPTR_006G016900v3	267.68	-1.1578	1.36868e-13	AT2G35760	Uncharacterised protein family (UPF0497)
POPTR_006G277800v3	1140.08	-1.15805	2.35945e-34	AT5G24800	basic leucine zipper 9
POPTR_017G119600v3	375.905	-1.15885	1.62508e-19	AT1G72690
POPTR_010G164700v3	233.823	-1.15924	3.96249e-14	AT1G14020	O-fucosyltransferase family protein
POPTR_004G140200v3	311.191	-1.15983	3.27763e-18	AT1G49740	PLC-like phosphodiesterases superfamily protein
POPTR_012G011700v3	1806.34	-1.16009	2.51909e-15	NA	NA
POPTR_001G098300v3	229.504	-1.16162	3.99665e-14	NA	NA
POPTR_003G119700v3	1068.21	-1.16281	1.50624e-50	NA	NA
POPTR_009G102400v3	133.747	-1.16282	9.63177e-10	AT3G19220	protein disulfide isomerases
POPTR_008G158300v3	192.416	-1.16342	3.52657e-14
POPTR_015G069400v3	391.02	-1.16465	1.36696e-18	AT5G62910	RING/U-box superfamily protein
POPTR_011G140000v3	289.787	-1.16556	2.81247e-13	NA	NA
POPTR_006G092300v3	1929.68	-1.1658	2.79458e-16
POPTR_014G090500v3	386.243	-1.16677	3.28967e-16	AT3G61530	Phosphoenolpyruvate carboxylase family protein
POPTR_009G119000v3	152.55	-1.16797	1.82839e-09	AT4G34560	(1 of 11) PF14364 - Domain of unknown function (DUF4408) (DUF4408)
POPTR_006G049700v3	130.383	-1.16908	4.25524e-12	AT2G41710	Integrase-type DNA-binding superfamily protein
POPTR_010G127000v3	777.682	-1.16923	1.67951e-14	AT1G13340	Regulator of Vps4 activity in the MVB pathway protein
POPTR_002G250800v3	266.785	-1.16941	4.03734e-17	NA	NA
POPTR_001G162000v3	120.045	-1.17006	3.70319e-07	NA	NA
POPTR_001G147300v3	538.632	-1.17032	1.43744e-25	NA	NA
POPTR_008G221000v3	308.995	-1.17034	6.35541e-17	NA	NA
POPTR_005G243000v3	544.106	-1.17054	1.25916e-16	NA	NA
POPTR_007G051600v3	717.879	-1.17161	1.23709e-25	AT4G37450	arabinogalactan protein 18
POPTR_010G172700v3	497.435	-1.17232	1.00389e-26
POPTR_007G032800v3	1460.14	-1.17276	4.43833e-28	AT3G50780
POPTR_001G242300v3	1645.23	-1.1743	2.67702e-36	AT5G59480	Haloacid dehalogenase-like hydrolase (HAD) superfamily protein
POPTR_009G004000v3	895.29	-1.1744	1.69431e-17	NA	NA
POPTR_018G133500v3	594.413	-1.17579	1.52241e-21	NA	NA
POPTR_009G013500v3	121.383	-1.17625	8.53037e-10	AT3G45230	hydroxyproline-rich glycoprotein family protein
POPTR_001G044300v3	137.128	-1.17633	1.03381e-11	NA	NA
POPTR_011G056800v3	157.388	-1.17671	7.9317e-14	NA	NA
POPTR_009G087000v3	116.454	-1.17684	1.14903e-10	AT1G49950	telomere repeat binding factor 1
POPTR_009G101400v3	193.621	-1.17702	1.09637e-13
POPTR_012G060600v3	1040.59	-1.17759	3.0164e-39	NA	NA
POPTR_003G090600v3	179.158	-1.17772	1.69009e-17	NA	NA
POPTR_019G112300v3	204.152	-1.17784	3.26278e-13	NA	NA
POPTR_016G043100v3	1573.18	-1.17838	4.84943e-34	NA	NA
POPTR_019G042500v3	1123.3	-1.17865	2.50826e-35	NA	NA
POPTR_008G195000v3	253.926	-1.17871	2.56112e-20	NA	NA
POPTR_008G207500v3	524.499	-1.17872	4.87318e-18	NA	NA
POPTR_014G045200v3	1050.49	-1.17989	1.41587e-24	AT5G65274	ARP2/3 complex 16 kDa subunit (p16-Arc)
POPTR_010G110800v3	793.504	-1.18019	5.0419e-32	AT1G23150	(1 of 3) PTHR33270:SF5 - GB
POPTR_004G140100v3	410.363	-1.18052	2.89224e-17	AT3G19380	plant U-box 25
POPTR_006G201000v3	329.273	-1.18311	3.20818e-20	NA	NA
POPTR_015G122000v3	338.846	-1.18387	3.85775e-11
POPTR_006G226500v3	869.256	-1.18494	4.48767e-27	NA	NA
POPTR_003G154500v3	4499.27	-1.18578	1.84717e-43	NA	NA
POPTR_015G038700v3	1223.34	-1.18772	3.84749e-40	AT1G73590	Auxin efflux carrier family protein
POPTR_014G066400v3	254.402	-1.18813	7.46934e-20	AT2G45080	cyclin p3;1
POPTR_017G051800v3	1029.79	-1.18823	9.69244e-36	AT5G64250	Aldolase-type TIM barrel family protein
POPTR_003G089800v3	336.921	-1.18825	9.48178e-23	NA	NA
POPTR_004G086600v3	402.441	-1.18875	4.08675e-15	AT2G15050	lipid transfer protein
POPTR_007G062282v3	1531.32	-1.19142	6.79803e-14	ATMG00030
POPTR_014G107000v3	148.375	-1.19156	8.02275e-12	NA	NA
POPTR_017G032800v3	542.188	-1.19164	1.10622e-28	AT2G31560	Protein of unknown function (DUF1685)
POPTR_002G022200v3	178.027	-1.19281	7.71039e-12	NA	NA
POPTR_003G217500v3	102.423	-1.19291	3.86508e-06
POPTR_001G236400v3	1640.83	-1.19328	1.66689e-41	AT3G46010	actin depolymerizing factor 1
POPTR_001G398300v3	169.326	-1.19421	3.46055e-15	NA	NA
POPTR_010G085600v3	780.191	-1.19431	0.000217185	AT2G32020	Acyl-CoA N-acyltransferases (NAT) superfamily protein
POPTR_014G091200v3	4247.91	-1.195	4.53199e-57	AT2G46170	Reticulon family protein
POPTR_002G257700v3	1983.69	-1.19578	1.55848e-39	NA	NA
POPTR_004G006200v3	453.908	-1.19642	3.36611e-14	AT1G62310	transcription factor jumonji (jmjC) domain-containing protein
POPTR_001G334800v3	1379.55	-1.19775	2.17166e-30
POPTR_005G235700v3	2094.06	-1.19804	4.09424e-38	NA	NA
POPTR_005G245300v3	2336.18	-1.19865	5.1791e-38	NA	NA
POPTR_006G021700v3	362.148	-1.19954	3.47499e-29	AT3G22260	Cysteine proteinases superfamily protein
POPTR_001G149100v3	351.793	-1.20039	9.88407e-09	NA	NA
POPTR_008G012400v3	157.628	-1.20086	4.40859e-11
POPTR_001G018300v3	133.718	-1.20287	1.24043e-13	AT1G51170	Protein kinase superfamily protein
POPTR_016G065700v3	113.628	-1.20326	4.41369e-11	NA	NA
POPTR_001G154500v3	114.732	-1.20331	5.28606e-12	NA	NA
POPTR_004G007400v3	440.433	-1.20344	1.27672e-17	AT1G11915	(1 of 1) PTHR33355:SF5 - F12F1.23 PROTEIN
POPTR_014G106000v3	1226.02	-1.20373	5.91094e-29	NA	NA
POPTR_002G114400v3	202.277	-1.20383	1.7337e-12	NA	NA
POPTR_002G256100v3	127.927	-1.20416	7.91526e-09	NA	NA
POPTR_011G149500v3	633.442	-1.20457	3.91107e-35	NA	NA
POPTR_001G167900v3	448.321	-1.2048	1.35114e-15	NA	NA
POPTR_002G106300v3	1199.81	-1.20489	3.24116e-27	NA	NA
POPTR_009G142300v3	194.987	-1.20556	4.3191e-15
POPTR_016G051600v3	228.848	-1.20596	1.49791e-17	NA	NA
POPTR_005G081200v3	109.821	-1.20662	1.4305e-09	NA	NA
POPTR_013G159800v3	422.785	-1.20715	1.12954e-31	NA	NA
POPTR_005G196700v3	3110.12	-1.20747	4.35472e-24	NA	NA
POPTR_012G058300v3	114.174	-1.20786	1.52346e-11	NA	NA
POPTR_005G251300v3	759.588	-1.20888	7.57426e-27	NA	NA
POPTR_012G107100v3	379.992	-1.20907	5.32044e-13	NA	NA
POPTR_001G020900v3	182.946	-1.20932	1.07439e-12	AT3G63440	cytokinin oxidase/dehydrogenase 6
POPTR_005G039800v3	5041.86	-1.20943	1.89709e-32	NA	NA
POPTR_001G102200v3	475.896	-1.20969	1.98529e-26	NA	NA
POPTR_015G106532v3	2538.78	-1.21267	5.64231e-24	AT1G69620	ribosomal protein L34
POPTR_018G092900v3	128.278	-1.21267	1.81513e-09	AT1G07660	Histone superfamily protein
POPTR_019G117566v3	403.919	-1.21273	3.76815e-19	NA	NA
POPTR_007G016600v3	214.193	-1.21292	7.45847e-23	AT5G66320	GATA transcription factor 5
POPTR_002G108600v3	1760.85	-1.21301	5.09201e-49	NA	NA
POPTR_010G065200v3	537.382	-1.21302	3.69589e-18	AT1G04550	AUX/IAA transcriptional regulator family protein
POPTR_012G129600v3	201.36	-1.21344	1.34315e-12	NA	NA
POPTR_001G310500v3	2140.54	-1.21414	2.40611e-16	AT5G64300	GTP cyclohydrolase II
POPTR_005G078600v3	784.319	-1.21553	4.34493e-18	NA	NA
POPTR_002G158500v3	154.821	-1.21679	3.53791e-16	AT1G01730
POPTR_006G147700v3	209.096	-1.21703	2.15964e-09	NA	NA
POPTR_011G050700v3	154.649	-1.21723	6.20282e-10	NA	NA
POPTR_016G024400v3	124.648	-1.21852	4.61114e-12	NA	NA
POPTR_005G002900v3	136.637	-1.21969	1.19851e-08	NA	NA
POPTR_011G031200v3	182.227	-1.2205	2.97025e-12	NA	NA
POPTR_004G163300v3	5593.25	-1.2206	3.4879e-17	AT2G16500	arginine decarboxylase 1
POPTR_006G066700v3	188.948	-1.22093	3.87698e-16	AT2G13290	beta-1,4-N-acetylglucosaminyltransferase family protein
POPTR_016G079800v3	1994.57	-1.22205	5.17629e-35	NA	NA
POPTR_008G172400v3	250.499	-1.2226	2.08174e-20	AT1G04550	AUX/IAA transcriptional regulator family protein
POPTR_013G025900v3	1392.55	-1.22269	1.70628e-25	NA	NA
POPTR_010G153200v3	208.536	-1.22278	6.48132e-17	AT3G17365	S-adenosyl-L-methionine-dependent methyltransferases superfamily protein
POPTR_010G102900v3	795.818	-1.22286	4.53803e-30	AT2G01830	CHASE domain containing histidine kinase protein
POPTR_016G098200v3	1663.9	-1.2235	1.89172e-45	NA	NA
POPTR_004G180500v3	392.29	-1.22373	7.46762e-21
POPTR_008G132600v3	1392.26	-1.22408	1.89928e-34	AT2G01610	Plant invertase/pectin methylesterase inhibitor superfamily protein
POPTR_014G125700v3	873.151	-1.22466	4.67799e-23	NA	NA
POPTR_001G472800v3	825.492	-1.22472	2.41183e-21	NA	NA
POPTR_005G195600v3	6558.24	-1.22597	8.81171e-103	NA	NA
POPTR_017G108500v3	10717.3	-1.22664	2.57288e-33	AT5G38760	Late embryogenesis abundant protein (LEA) family protein
POPTR_018G141500v3	109.461	-1.22711	3.14984e-11	NA	NA
POPTR_008G060100v3	645.757	-1.22782	7.65789e-38	AT2G39770	Glucose-1-phosphate adenylyltransferase family protein
POPTR_002G157700v3	3697.43	-1.22827	2.57113e-47	AT3G61260	Remorin family protein
POPTR_017G144800v3	1100.75	-1.22866	3.52081e-25	NA	NA
POPTR_006G122000v3	834.866	-1.2293	1.11077e-34	AT3G53190	Pectin lyase-like superfamily protein
POPTR_012G038800v3	155.113	-1.23008	6.75257e-11	NA	NA
POPTR_006G168100v3	257.73	-1.23042	3.35631e-12	NA	NA
POPTR_001G095200v3	140.645	-1.23077	3.93472e-14	NA	NA
POPTR_008G192100v3	121.715	-1.23209	5.02375e-09	AT1G27210	ARM repeat superfamily protein
POPTR_001G133000v3	180.664	-1.23249	5.24432e-07	NA	NA
POPTR_019G127600v3	196.849	-1.2329	2.71885e-15	NA	NA
POPTR_004G140301v3	102.96	-1.23312	4.77415e-09	AT3G19300	Protein kinase superfamily protein
POPTR_017G081000v3	1570.98	-1.23342	1.44715e-41	AT1G50010	tubulin alpha-2 chain
POPTR_016G117300v3	342.979	-1.23354	7.90123e-18	NA	NA
POPTR_007G110600v3	193.396	-1.23473	1.7521e-09	AT5G64660	CYS, MET, PRO, and GLY protein 2
POPTR_008G158800v3	2387.19	-1.23589	2.21986e-20	AT5G43810	Stabilizer of iron transporter SufD / Polynucleotidyl transferase
POPTR_005G230600v3	1186.58	-1.23734	2.82867e-44	NA	NA
POPTR_003G072700v3	2156.82	-1.23823	1.20442e-28	NA	NA
POPTR_015G012700v3	176.446	-1.2383	1.40945e-10	AT4G22000
POPTR_012G047800v3	832.275	-1.23832	1.88264e-27	NA	NA
POPTR_004G068901v3	174.132	-1.23891	8.19161e-15
POPTR_007G048800v3	234.62	-1.2397	2.54861e-18	AT4G37250	Leucine-rich repeat protein kinase family protein
POPTR_008G210900v3	282.599	-1.23987	2.04673e-19	NA	NA
POPTR_002G093300v3	132.573	-1.24073	1.37042e-10	NA	NA
POPTR_002G164400v3	199.584	-1.24136	1.09423e-13	AT4G01250	WRKY family transcription factor
POPTR_019G038851v3	1310.4	-1.24171	1.14544e-38	NA	NA
POPTR_006G204700v3	186.149	-1.24211	1.55331e-13	NA	NA
POPTR_012G102200v3	136.943	-1.24224	2.31794e-08	NA	NA
POPTR_007G062542v3	266.699	-1.24255	1.1945e-18
POPTR_008G041800v3	186.766	-1.2427	8.12087e-17	AT3G07990	serine carboxypeptidase-like 27
POPTR_001G355100v3	789.543	-1.24323	2.17143e-42
POPTR_017G147500v3	344.284	-1.24335	0.000648047	NA	NA
POPTR_010G074300v3	11064.9	-1.24536	1.74366e-96	AT3G23150	Signal transduction histidine kinase, hybrid-type, ethylene sensor
POPTR_001G074600v3	983.519	-1.2456	1.8383e-40	NA	NA
POPTR_018G150800v3	739.315	-1.24565	3.04341e-16	NA	NA
POPTR_003G162400v3	150.998	-1.24676	2.9929e-17	NA	NA
POPTR_005G020300v3	864.458	-1.24682	1.08806e-18	NA	NA
POPTR_005G233900v3	234.125	-1.24685	5.60968e-12	NA	NA
POPTR_001G358600v3	1509.54	-1.24721	3.34719e-59	AT1G30320	Remorin family protein
POPTR_001G238300v3	283.298	-1.24744	4.35614e-22	AT5G59350
POPTR_006G204300v3	2626.49	-1.24801	0.000482348	NA	NA
POPTR_001G397200v3	2536.16	-1.24813	2.49574e-48	NA	NA
POPTR_013G091000v3	153.007	-1.24901	5.1546e-11	AT3G56370	Leucine-rich repeat protein kinase family protein
POPTR_005G176200v3	441.028	-1.24901	1.94489e-20	NA	NA
POPTR_019G117500v3	273.682	-1.24984	1.89908e-15	NA	NA
POPTR_010G173200v3	167.941	-1.25013	2.59276e-11	AT1G16330	cyclin b3;1
POPTR_001G257100v3	410.001	-1.25085	1.58801e-27	AT5G19450	calcium-dependent protein kinase 19
POPTR_014G143100v3	595.503	-1.25095	1.34351e-31	NA	NA
POPTR_015G043400v3	231.492	-1.25459	3.43311e-18
POPTR_010G178400v3	612.791	-1.25508	7.72541e-24	AT1G65540	LETM1-like protein
POPTR_014G125100v3	374.268	-1.2551	2.08551e-29	NA	NA
POPTR_005G024800v3	1856.05	-1.25519	5.16998e-39	NA	NA
POPTR_001G016200v3	273.684	-1.25958	3.23884e-19	AT3G20810	2-oxoglutarate (2OG) and Fe(II)-dependent oxygenase superfamily protein
POPTR_014G089600v3	663.058	-1.26047	1.88592e-23	AT1G01500	Erythronate-4-phosphate dehydrogenase family protein
POPTR_010G191300v3	7044.27	-1.26073	1.37883e-08	AT3G55840	Hs1pro-1 protein
POPTR_008G095500v3	115.768	-1.26098	2.23955e-12	AT2G03590	ureide permease 1
POPTR_008G134100v3	135.236	-1.26099	8.18909e-08	AT1G24600
POPTR_013G109300v3	456.91	-1.26238	3.98586e-25	NA	NA
POPTR_002G004900v3	567.9	-1.2626	0.000444429	NA	NA
POPTR_016G134200v3	979.182	-1.26287	2.01976e-34	NA	NA
POPTR_004G173800v3	1403.16	-1.26325	1.79453e-30	AT2G16700	actin depolymerizing factor 5
POPTR_010G206766v3	1099.85	-1.26436	1.52761e-42	AT5G59300	ubiquitin carrier protein 7
POPTR_006G192700v3	246.835	-1.26482	4.14257e-10	NA	NA
POPTR_002G015500v3	117.63	-1.26552	1.85398e-11	NA	NA
POPTR_010G152000v3	2402.63	-1.26636	7.59597e-59	AT1G48100	Pectin lyase-like superfamily protein
POPTR_012G052501v3	789.903	-1.26839	4.14881e-23	NA	NA
POPTR_007G036400v3	250.668	-1.26839	4.68728e-16	AT3G50410	OBF binding protein 1
POPTR_002G035000v3	747.869	-1.26848	5.36437e-26	NA	NA
POPTR_016G077200v3	2371.01	-1.26918	1.15537e-32	NA	NA
POPTR_001G316300v3	103.493	-1.26962	0.000101484	AT1G27270	Paired amphipathic helix (PAH2) superfamily protein
POPTR_011G098500v3	355.193	-1.27075	1.66024e-25	NA	NA
POPTR_003G056600v3	134.546	-1.27207	3.58138e-14	NA	NA
POPTR_005G002250v3	2499.05	-1.27295	1.35383e-42	NA	NA
POPTR_017G051700v3	3949.55	-1.27396	1.65578e-69	AT5G64260	EXORDIUM like 2
POPTR_002G133500v3	790.392	-1.27404	9.69627e-20	NA	NA
POPTR_010G039800v3	221.767	-1.2741	2.25912e-13	NA	NA
POPTR_014G006900v3	1357.29	-1.27483	1.2697e-24	NA	NA
POPTR_018G065600v3	290.87	-1.27583	1.00279e-26	AT2G06050	oxophytodienoate-reductase 3
POPTR_019G067500v3	575.443	-1.27628	2.41105e-33	NA	NA
POPTR_002G023500v3	1464.62	-1.27702	1.88533e-32	NA	NA
POPTR_001G026200v3	350.771	-1.27702	6.52854e-21
POPTR_002G143400v3	791.968	-1.27831	4.05015e-28	NA	NA
POPTR_002G235500v3	248.023	-1.27961	4.20703e-19	NA	NA
POPTR_001G104366v3	712.251	-1.28054	2.0633e-23	NA	NA
POPTR_004G044000v3	945.51	-1.28059	1.58651e-37
POPTR_019G117402v3	112.505	-1.281	2.5703e-11	NA	NA
POPTR_006G100500v3	5696.63	-1.28118	8.05654e-80	AT5G01410	Aldolase-type TIM barrel family protein
POPTR_001G190700v3	213.96	-1.28306	7.48171e-13	NA	NA
POPTR_018G127800v3	1327.35	-1.28317	6.78374e-42	NA	NA
POPTR_006G130200v3	4208.3	-1.28363	3.30919e-33	NA	NA
POPTR_018G078900v3	126.183	-1.28421	1.85734e-11	AT1G52342
POPTR_005G100000v3	129.092	-1.28538	1.38401e-12	NA	NA
POPTR_003G081200v3	1058.88	-1.28539	8.19165e-22	NA	NA
POPTR_003G085800v3	694.245	-1.28862	1.32678e-42	NA	NA
POPTR_008G014300v3	1571.66	-1.28869	5.87011e-54
POPTR_018G016300v3	100.709	-1.28898	1.49839e-11	NA	NA
POPTR_013G061200v3	5249.37	-1.2897	5.29182e-62	AT1G08570	atypical CYS HIS rich thioredoxin 4
POPTR_001G059500v3	206.92	-1.29074	8.52515e-18	NA	NA
POPTR_009G055800v3	813.618	-1.2912	8.82039e-32
POPTR_002G051800v3	789.596	-1.29127	5.73009e-33	NA	NA
POPTR_015G087800v3	1037.63	-1.29131	6.46606e-42	AT4G24780	Pectin lyase-like superfamily protein
POPTR_002G174700v3	107.437	-1.29234	6.6999e-08	NA	NA
POPTR_014G084900v3	121.795	-1.29273	2.90225e-10	AT2G45910	U-box domain-containing protein kinase family protein
POPTR_004G135500v3	1141.68	-1.29339	1.62109e-33	AT1G07650	Leucine-rich repeat transmembrane protein kinase
POPTR_T011200v3	13561.3	-1.29426	7.10402e-32	NA	NA
POPTR_018G063500v3	14871.3	-1.29448	9.58396e-68	AT5G20830	sucrose synthase 1
POPTR_003G206201v3	145.866	-1.29487	1.0665e-13	AT4G31980	(1 of 1) PF03140//PF05903 - Plant protein of unknown function (DUF247) // PPPDE putative peptidase domain (Peptidase_C97)
POPTR_011G055900v3	150.007	-1.29679	1.68782e-07	NA	NA
POPTR_006G237200v3	144.967	-1.30068	1.02862e-10	NA	NA
POPTR_018G034100v3	167.952	-1.30082	1.29286e-12	AT5G25380	cyclin a2;1
POPTR_010G046800v3	265.854	-1.30096	1.21628e-18	NA	NA
POPTR_011G131700v3	831.31	-1.30315	1.83102e-29	NA	NA
POPTR_010G211700v3	170.735	-1.30357	1.08841e-14
POPTR_012G023400v3	156.786	-1.30402	2.73534e-10	NA	NA
POPTR_014G001500v3	231.19	-1.30461	1.53081e-19	NA	NA
POPTR_017G063300v3	904.34	-1.30551	5.07072e-17
POPTR_009G117500v3	1757.4	-1.30559	1.39182e-49	AT2G21620	Adenine nucleotide alpha hydrolases-like superfamily protein
POPTR_001G250500v3	160.022	-1.3062	3.46852e-15	AT1G07230	non-specific phospholipase C1
POPTR_010G108200v3	11763.9	-1.30685	2.44649e-54
POPTR_014G157500v3	288.221	-1.30745	5.37381e-26	NA	NA
POPTR_008G061000v3	140.727	-1.30849	2.39409e-13	AT5G02030	POX (plant homeobox) family protein
POPTR_014G134200v3	336.803	-1.30893	7.19129e-17	NA	NA
POPTR_013G046100v3	104.133	-1.31016	6.68119e-09	NA	NA
POPTR_002G056400v3	356.789	-1.31031	6.60825e-24	NA	NA
POPTR_003G061300v3	735.107	-1.3105	1.07014e-22	NA	NA
POPTR_010G241700v3	388.8	-1.31097	7.38066e-24	AT5G04830	Nuclear transport factor 2 (NTF2) family protein
POPTR_013G147800v3	1046.07	-1.31191	1.08945e-26	NA	NA
POPTR_019G123500v3	895.323	-1.31196	6.06848e-17	NA	NA
POPTR_016G131800v3	339.585	-1.31256	2.59952e-10	NA	NA
POPTR_012G035700v3	114.237	-1.31282	1.31549e-10	NA	NA
POPTR_003G216400v3	136.142	-1.31344	1.07804e-10	AT3G13650	Disease resistance-responsive (dirigent-like protein) family protein
POPTR_004G145800v3	285.71	-1.31368	8.51791e-13	AT3G19050	phragmoplast orienting kinesin 2
POPTR_017G017300v3	258.812	-1.31372	3.38424e-11	AT1G28480	Thioredoxin superfamily protein
POPTR_007G090900v3	172.8	-1.31749	1.47227e-21	AT5G10100	Haloacid dehalogenase-like hydrolase (HAD) superfamily protein
POPTR_008G137900v3	1574.19	-1.31758	3.50984e-37	AT2G01830	CHASE domain containing histidine kinase protein
POPTR_015G126800v3	4428.61	-1.31839	7.22741e-35	AT5G62390	BCL-2-associated athanogene 7
POPTR_014G115500v3	1171.62	-1.31843	2.77466e-29	NA	NA
POPTR_009G139400v3	2989.27	-1.31882	3.1981e-28	AT4G38470	ACT-like protein tyrosine kinase family protein
POPTR_002G199600v3	219.761	-1.31904	9.18052e-26	NA	NA
POPTR_008G169000v3	121.054	-1.31911	8.90119e-15	AT4G14330	P-loop containing nucleoside triphosphate hydrolases superfamily protein
POPTR_015G007900v3	112.936	-1.31995	1.69932e-10
POPTR_004G055000v3	1028.51	-1.32192	8.99715e-70	AT1G29050	TRICHOME BIREFRINGENCE-LIKE 38
POPTR_005G105000v3	150.809	-1.32403	5.50476e-07	NA	NA
POPTR_011G007400v3	240.712	-1.32409	6.28785e-25	AT2G32510	mitogen-activated protein kinase kinase kinase 17
POPTR_018G016400v3	125.384	-1.32513	1.30654e-11	NA	NA
POPTR_003G055000v3	140.599	-1.32611	9.23887e-17	AT1G52330	Late embryogenesis abundant (LEA) hydroxyproline-rich glycoprotein family
POPTR_019G116400v3	421.751	-1.3263	5.99872e-23	NA	NA
POPTR_001G440900v3	270.872	-1.32756	1.30838e-19	AT2G34880	Transcription factor jumonji (jmj) family protein / zinc finger (C5HC2 type) family protein
POPTR_008G052100v3	1082.96	-1.32863	7.92937e-39	AT3G46010	actin depolymerizing factor 1
POPTR_001G061600v3	220.651	-1.32887	3.44625e-17	NA	NA
POPTR_001G134000v3	100.919	-1.32937	3.53261e-08	NA	NA
POPTR_003G062400v3	803.885	-1.3309	5.77356e-54	NA	NA
POPTR_003G173400v3	197.694	-1.33101	1.92067e-24	NA	NA
POPTR_001G172700v3	487.054	-1.33279	2.35808e-21	NA	NA
POPTR_005G036800v3	614.868	-1.33398	2.9575e-05	NA	NA
POPTR_008G115900v3	265.398	-1.33408	2.3131e-18	AT3G25700	Eukaryotic aspartyl protease family protein
POPTR_019G048800v3	227.681	-1.33535	2.29503e-24	NA	NA
POPTR_018G072500v3	122.062	-1.33563	5.47889e-18	AT4G13370	Plant protein of unknown function (DUF936)
POPTR_007G000900v3	210.506	-1.33579	1.11879e-15	AT5G23420	high-mobility group box 6
POPTR_006G173901v3	200.842	-1.33591	3.36295e-15	NA	NA
POPTR_005G233600v3	5202.29	-1.33773	1.51608e-53	NA	NA
POPTR_008G162500v3	236.783	-1.33788	2.44298e-29	AT5G43630	zinc knuckle (CCHC-type) family protein
POPTR_009G034700v3	721.551	-1.33975	3.08866e-34
POPTR_001G154100v3	1032.65	-1.3407	1.13262e-22	NA	NA
POPTR_009G085400v3	372.283	-1.34075	5.35428e-15
POPTR_001G277900v3	225.92	-1.34075	2.33441e-15	AT5G48870	Small nuclear ribonucleoprotein family protein
POPTR_016G074300v3	182.525	-1.34227	3.25494e-19	NA	NA
POPTR_010G195800v3	803.312	-1.34227	2.74291e-30	AT3G54000
POPTR_001G271700v3	511.484	-1.34237	8.63514e-15	AT3G45640	mitogen-activated protein kinase 3
POPTR_003G115200v3	339.417	-1.34563	1.61707e-10	NA	NA
POPTR_006G003000v3	425.001	-1.34674	1.38217e-14	NA	NA
POPTR_006G234300v3	1232.56	-1.34768	1.74605e-34	NA	NA
POPTR_005G240300v3	160.315	-1.34769	1.50819e-12	NA	NA
POPTR_017G116600v3	166.531	-1.34958	1.01771e-14	AT3G02580	sterol 1
POPTR_004G017500v3	215.563	-1.35047	2.24772e-16	AT4G21820	binding;calmodulin binding
POPTR_019G016106v3	102.197	-1.35098	3.13771e-06	NA	NA
POPTR_014G158400v3	1699.46	-1.35181	4.82991e-61	NA	NA
POPTR_008G073600v3	1131.71	-1.35259	1.61423e-31	AT3G11020	DRE/CRT-binding protein 2B
POPTR_001G056800v3	1244.01	-1.35326	2.5465e-37	NA	NA
POPTR_008G056000v3	218.21	-1.35363	4.44113e-17	AT3G55430	O-Glycosyl hydrolases family 17 protein
POPTR_005G038600v3	210.803	-1.35435	6.75755e-15	NA	NA
POPTR_002G172000v3	110.705	-1.35461	1.06541e-12
POPTR_002G137700v3	310.056	-1.35496	2.28908e-21	NA	NA
POPTR_004G181100v3	403.628	-1.35535	2.62617e-06
POPTR_001G178300v3	759.555	-1.3555	3.13657e-50	NA	NA
POPTR_014G036500v3	1096.59	-1.35658	5.35688e-46	AT1G47670	Transmembrane amino acid transporter family protein
POPTR_011G061700v3	870.278	-1.3571	9.88959e-23	NA	NA
POPTR_017G013700v3	1914.34	-1.35814	2.95516e-36	NA	NA
POPTR_016G033100v3	446.047	-1.35888	1.46179e-24	NA	NA
POPTR_014G106500v3	322.739	-1.35954	4.25195e-31	NA	NA
POPTR_010G024600v3	142.369	-1.36026	8.14152e-15	AT4G15790
POPTR_004G086400v3	310.219	-1.36099	2.16088e-31	AT1G66250	O-Glycosyl hydrolases family 17 protein
POPTR_002G080000v3	126.672	-1.36137	8.15411e-13	NA	NA
POPTR_001G136200v3	330.094	-1.36142	2.64921e-12	NA	NA
POPTR_015G131400v3	226.382	-1.36269	1.906e-16	AT5G51600	Microtubule associated protein (MAP65/ASE1) family protein
POPTR_006G136600v3	114.468	-1.36286	1.16595e-11	NA	NA
POPTR_008G132700v3	480.556	-1.36397	7.11057e-35	AT1G23210	glycosyl hydrolase 9B6
POPTR_001G171600v3	117.882	-1.36538	3.76058e-09	NA	NA
POPTR_017G090100v3	233.53	-1.36603	2.68644e-22	AT3G01060	(1 of 1) PF14234 - Domain of unknown function (DUF4336) (DUF4336)
POPTR_013G099500v3	121.639	-1.36666	3.94562e-09	NA	NA
POPTR_002G161900v3	1460.93	-1.36687	2.93117e-35	AT3G61460	brassinosteroid-responsive RING-H2
POPTR_001G088100v3	802.2	-1.36724	5.31571e-38	NA	NA
POPTR_008G054400v3	174.137	-1.36769	2.61917e-14	AT5G59350
POPTR_014G109100v3	159.241	-1.36782	2.36311e-18	NA	NA
POPTR_006G105500v3	278.712	-1.36802	7.67862e-08
POPTR_008G057100v3	550.626	-1.37009	8.14484e-30	AT2G39700	expansin A4
POPTR_004G226900v3	397.519	-1.3703	3.06362e-22	NA	NA
POPTR_016G137900v3	766.639	-1.37278	7.71924e-21	NA	NA
POPTR_009G026000v3	390.878	-1.37458	2.13102e-21	AT3G45850	P-loop containing nucleoside triphosphate hydrolases superfamily protein
POPTR_001G335300v3	1540.04	-1.3748	9.04411e-08	AT5G40780	lysine histidine transporter 1
POPTR_019G079600v3	212.99	-1.37487	1.70368e-16	NA	NA
POPTR_002G205500v3	319.824	-1.37536	3.43322e-14	NA	NA
POPTR_016G009500v3	393.256	-1.37613	2.50078e-21	NA	NA
POPTR_012G071100v3	184.326	-1.37726	6.79466e-21	NA	NA
POPTR_014G016400v3	230.347	-1.37731	1.36127e-14	NA	NA
POPTR_015G039500v3	841.78	-1.37803	3.26157e-36	AT1G73630	EF hand calcium-binding protein family
POPTR_010G073500v3	264.834	-1.37844	1.09103e-25	AT5G43460	HR-like lesion-inducing protein-related
POPTR_005G144900v3	630.211	-1.37866	2.00534e-36	NA	NA
POPTR_017G001400v3	3053.91	-1.38046	1.15601e-53	NA	NA
POPTR_015G131300v3	232.997	-1.38077	1.44945e-12
POPTR_006G219600v3	351.426	-1.38139	1.27478e-31	NA	NA
POPTR_008G210100v3	234.302	-1.38316	4.62144e-19	NA	NA
POPTR_002G114500v3	995.577	-1.38403	1.55736e-27	NA	NA
POPTR_001G174300v3	1200.53	-1.38458	2.49053e-34	NA	NA
POPTR_008G221700v3	143.369	-1.38572	6.26808e-13	NA	NA
POPTR_013G129800v3	829.796	-1.38588	6.66673e-20	NA	NA
POPTR_002G156000v3	678.415	-1.386	1.98621e-49	AT4G00570	NAD-dependent malic enzyme 2
POPTR_002G084800v3	591.696	-1.38645	1.25132e-40	NA	NA
POPTR_014G172000v3	139.919	-1.38647	4.19191e-14	NA	NA
POPTR_010G244900v3	164.307	-1.38717	1.57813e-17	NA	NA
POPTR_010G100700v3	183.497	-1.38775	5.01475e-21	AT2G01990
POPTR_008G133000v3	103.926	-1.38778	1.50038e-10	AT1G23220	Dynein light chain type 1 family protein
POPTR_011G141700v3	164.026	-1.38979	1.59505e-15	NA	NA
POPTR_017G011200v3	245.231	-1.39038	3.8014e-16	NA	NA
POPTR_006G015200v3	118.081	-1.39057	4.61989e-15	AT2G35740	nositol transporter 3
POPTR_009G145400v3	292.138	-1.39076	6.8566e-21	AT2G27690	cytochrome P450, family 94, subfamily C, polypeptide 1
POPTR_016G103400v3	522.096	-1.39162	1.19785e-47	NA	NA
POPTR_014G161300v3	14940.4	-1.3924	2.06616e-29	NA	NA
POPTR_001G019200v3	222.898	-1.39306	5.33167e-20
POPTR_018G021900v3	184.849	-1.3931	3.20255e-18	NA	NA
POPTR_011G166500v3	104.253	-1.39383	6.30397e-09	NA	NA
POPTR_010G111000v3	274.172	-1.39517	1.19771e-13	AT1G23130	Polyketide cyclase/dehydrase and lipid transport superfamily protein
POPTR_014G135570v3	739.515	-1.39627	4.0925e-39	NA	NA
POPTR_001G016700v3	227.456	-1.39631	2.04985e-16	AT5G10400	Histone superfamily protein
POPTR_002G070500v3	180.753	-1.39724	0.000532114	NA	NA
POPTR_014G032600v3	394.793	-1.39818	8.53024e-29	NA	NA
POPTR_004G148200v3	5754.88	-1.39895	7.2976e-35	AT2G15960
POPTR_005G107700v3	605.646	-1.39907	5.57022e-22	NA	NA
POPTR_010G042100v3	1913.51	-1.40228	2.56595e-47	NA	NA
POPTR_007G127300v3	961.764	-1.40282	3.44018e-09	AT2G43320	S-adenosyl-L-methionine-dependent methyltransferases superfamily protein
POPTR_004G134000v3	148.646	-1.40348	1.82983e-12	AT4G14140	DNA methyltransferase 2
POPTR_017G015700v3	652.924	-1.40451	1.83006e-29	NA	NA
POPTR_011G167200v3	255.471	-1.40818	7.8358e-21	NA	NA
POPTR_002G034000v3	1607.27	-1.40825	1.90156e-69	NA	NA
POPTR_009G027300v3	694.951	-1.4085	2.20165e-50	AT5G59780	myb domain protein 59
POPTR_004G168800v3	9521.56	-1.40916	6.53333e-38	AT4G38740	rotamase CYP 1
POPTR_012G123900v3	308.088	-1.41003	2.59942e-34	NA	NA
POPTR_002G121200v3	300.875	-1.41015	2.84749e-09
POPTR_003G096100v3	1025.61	-1.41036	1.10898e-33	NA	NA
POPTR_017G066388v3	138.24	-1.41172	1.43551e-15	AT5G14105
POPTR_019G059000v3	340.681	-1.41253	1.36787e-16	NA	NA
POPTR_015G105000v3	229.84	-1.41316	1.95901e-21	AT5G23720	dual specificity protein phosphatase family protein
POPTR_010G196000v3	155.004	-1.41453	8.75123e-16	AT5G05940	ROP guanine nucleotide exchange factor 5
POPTR_010G198100v3	511.14	-1.4147	1.079e-31
POPTR_001G343800v3	247.329	-1.41575	2.91762e-28	AT5G14490	NAC domain containing protein 85
POPTR_013G111700v3	268.114	-1.4162	5.33435e-22	NA	NA
POPTR_018G071400v3	623.87	-1.41694	1.22153e-28	AT2G26650	K+ transporter 1
POPTR_001G461400v3	491.122	-1.41707	3.35674e-31	AT1G30690	Sec14p-like phosphatidylinositol transfer family protein
POPTR_010G221700v3	606.835	-1.41746	4.20823e-45	AT3G54950	patatin-like protein 6
POPTR_002G065100v3	216.196	-1.41911	5.19389e-19	NA	NA
POPTR_018G019250v3	171.528	-1.41966	8.45038e-18	NA	NA
POPTR_001G082500v3	402.436	-1.42042	1.21567e-33	NA	NA
POPTR_014G109900v3	2132.3	-1.42181	2.08008e-33	NA	NA
POPTR_001G440300v3	409.014	-1.42224	1.99091e-24	AT5G44530	Subtilase family protein
POPTR_001G009600v3	343.439	-1.42319	3.90342e-30	AT1G69770	chromomethylase 3
POPTR_001G455400v3	161.414	-1.42392	3.6449e-13	AT1G14120	2-oxoglutarate (2OG) and Fe(II)-dependent oxygenase superfamily protein
POPTR_011G061800v3	103.498	-1.42412	1.1246e-05	NA	NA
POPTR_002G121400v3	545.212	-1.42418	8.37297e-14
POPTR_010G187800v3	1088.96	-1.4243	2.09901e-22	AT3G11170	fatty acid desaturase 7
POPTR_010G055400v3	19546.1	-1.4245	1.26024e-68	AT1G13440	glyceraldehyde-3-phosphate dehydrogenase C2
POPTR_010G108800v3	1381.44	-1.42508	3.03437e-10	AT1G14880	PLANT CADMIUM RESISTANCE 1
POPTR_006G260837v3	136.033	-1.4251	8.09196e-15	AT3G02190	Ribosomal protein L39 family protein
POPTR_002G085900v3	163.996	-1.42607	2.39277e-17	NA	NA
POPTR_010G088300v3	564.323	-1.42629	7.24489e-27	AT1G05370	Sec14p-like phosphatidylinositol transfer family protein
POPTR_014G086300v3	8224.32	-1.42646	5.16995e-89	AT3G61440	cysteine synthase C1
POPTR_005G048700v3	391.684	-1.42712	7.90842e-28	NA	NA
POPTR_002G118000v3	312.977	-1.4273	1.59984e-28	AT1G10200	GATA type zinc finger transcription factor family protein
POPTR_013G161600v3	1156.55	-1.42754	9.95317e-57	NA	NA
POPTR_005G239900v3	152.013	-1.42913	1.7847e-15	NA	NA
POPTR_007G066700v3	139.558	-1.42963	3.69559e-12
POPTR_015G103900v3	234.065	-1.42986	0.00038962	AT1G70170	matrix metalloproteinase
POPTR_005G250800v3	555.816	-1.43173	1.44982e-21	NA	NA
POPTR_017G144700v3	2683.76	-1.43305	6.78263e-67	NA	NA
POPTR_017G147400v3	327.041	-1.43359	1.71614e-07	NA	NA
POPTR_001G452500v3	190.067	-1.43522	8.05716e-14
POPTR_002G165000v3	2328.6	-1.43658	2.29234e-39	AT2G46140	Late embryogenesis abundant protein
POPTR_007G019600v3	640.363	-1.4372	1.35353e-06	AT1G43910	P-loop containing nucleoside triphosphate hydrolases superfamily protein
POPTR_017G055700v3	150.883	-1.43804	3.33984e-18	AT4G13600	Carbohydrate-binding X8 domain superfamily protein
POPTR_017G054000v3	905.064	-1.43809	2.42026e-55	AT2G32710	Cyclin-dependent kinase inhibitor family protein
POPTR_014G145700v3	1047.91	-1.43879	7.06071e-40	NA	NA
POPTR_005G168600v3	7793.93	-1.43894	2.4011e-40	NA	NA
POPTR_002G067600v3	231.39	-1.43904	9.62966e-21	NA	NA
POPTR_009G014100v3	732.97	-1.43937	9.17244e-25	AT3G45210	Protein of unknown function, DUF584
POPTR_001G314000v3	1080.34	-1.44123	4.57352e-37	AT2G32710	Cyclin-dependent kinase inhibitor family protein
POPTR_005G235200v3	1141.96	-1.44224	2.62579e-40	NA	NA
POPTR_007G044300v3	606.494	-1.44273	1.1627e-34	AT5G67030	zeaxanthin epoxidase (ZEP) (ABA1)
POPTR_010G132800v3	106.614	-1.44369	5.58658e-12	AT3G25600	Calcium-binding EF-hand family protein
POPTR_007G008200v3	1978.28	-1.44405	1.61976e-95	AT2G22800	Homeobox-leucine zipper protein family
POPTR_006G021600v3	3406.15	-1.44408	1.9354e-21	AT1G05340	(1 of 5) PTHR31568:SF17 - EXPRESSED PROTEIN
POPTR_010G101100v3	189.394	-1.44521	1.62018e-17	AT2G01950	BRI1-like 2
POPTR_002G081000v3	5392.19	-1.44603	5.41324e-84	NA	NA
POPTR_004G048301v3	1798.93	-1.44682	3.69267e-52	AT2G33850
POPTR_012G107900v3	104.787	-1.44769	2.22189e-12	NA	NA
POPTR_001G128600v3	168.928	-1.44805	5.456e-18	NA	NA
POPTR_006G046600v3	353.492	-1.44834	1.843e-42	AT5G04160	Nucleotide-sugar transporter family protein
POPTR_006G010300v3	383.215	-1.45033	1.01577e-25
POPTR_010G150500v3	3872.74	-1.45191	7.96264e-32
POPTR_001G112400v3	271.931	-1.45275	5.77143e-18	NA	NA
POPTR_018G102800v3	2580.85	-1.45285	1.72672e-98	NA	NA
POPTR_002G201000v3	1480.59	-1.45324	7.00673e-30	NA	NA
POPTR_011G165200v3	298.25	-1.4546	7.92733e-18	NA	NA
POPTR_010G193800v3	998.492	-1.45526	9.12523e-39	AT3G55770	GATA type zinc finger transcription factor family protein
POPTR_003G133300v3	288.53	-1.45533	1.3259e-24	NA	NA
POPTR_008G114300v3	124.533	-1.45547	4.306e-15	AT1G68760	nudix hydrolase 1
POPTR_004G028900v3	140.156	-1.45548	7.23672e-18
POPTR_010G119700v3	105.193	-1.45622	1.08021e-10	AT1G15060	Uncharacterised conserved protein UCP031088, alpha/beta hydrolase
POPTR_009G144100v3	1855.65	-1.45657	1.15662e-28	AT2G27580	A20/AN1-like zinc finger family protein
POPTR_002G065200v3	255.239	-1.458	9.75039e-21	NA	NA
POPTR_003G179900v3	175.002	-1.45891	1.68113e-18	NA	NA
POPTR_019G035000v3	208.862	-1.46106	9.29478e-15	NA	NA
POPTR_015G017700v3	202.825	-1.46128	4.71233e-23	AT5G67490	(1 of 1) PTHR28524:SF3 - UPF0369 PROTEIN C6ORF57
POPTR_004G138200v3	1832.74	-1.46313	4.54198e-63	AT1G22530	PATELLIN 2
POPTR_014G100300v3	1858.64	-1.46322	2.23532e-42	AT2G46550	(1 of 2) PTHR33868:SF2 - EXPRESSED PROTEIN
POPTR_001G317400v3	120.422	-1.46329	4.08373e-12
POPTR_003G210100v3	127.758	-1.4652	2.38216e-08	AT5G10400	Histone superfamily protein
POPTR_018G029900v3	638.339	-1.46522	1.37618e-33	AT5G25490	Ran BP2/NZF zinc finger-like superfamily protein
POPTR_013G006600v3	403.618	-1.46659	2.48083e-32	NA	NA
POPTR_017G139000v3	489.366	-1.46707	4.45144e-41	NA	NA
POPTR_016G009300v3	283.078	-1.46834	9.49249e-15	NA	NA
POPTR_009G040200v3	426.101	-1.46951	2.00723e-30	AT5G62690	tubulin beta chain 2
POPTR_003G182200v3	8527.82	-1.47155	7.958e-168	NA	NA
POPTR_001G102600v3	126.395	-1.47191	1.39243e-15	NA	NA
POPTR_007G116200v3	144.281	-1.47238	3.40337e-15	AT1G61000	(1 of 1) PTHR21650:SF2 - KINETOCHORE PROTEIN NUF2
POPTR_006G230200v3	391.972	-1.47406	7.90674e-37	NA	NA
POPTR_012G074700v3	2053.19	-1.4769	1.24384e-38	NA	NA
POPTR_010G121300v3	125.325	-1.4771	1.25151e-10	AT1G68430
POPTR_008G159200v3	157.734	-1.48193	1.68637e-19
POPTR_011G140800v3	211.183	-1.48213	6.87521e-21	NA	NA
POPTR_002G190400v3	1320.18	-1.4828	2.76739e-51	NA	NA
POPTR_007G046500v3	114.781	-1.48326	5.40496e-15	AT3G50260	cooperatively regulated by ethylene and jasmonate 1
POPTR_005G246800v3	323.028	-1.48382	9.8507e-22	NA	NA
POPTR_004G073000v3	2686.13	-1.48439	8.65752e-10	AT5G52740	Copper transport protein family
POPTR_006G056400v3	110.16	-1.48493	2.05697e-15	AT3G12170	Chaperone DnaJ-domain superfamily protein
POPTR_015G031400v3	351.388	-1.48507	2.19118e-17	AT3G17790	purple acid phosphatase 17
POPTR_008G144800v3	223.106	-1.4886	5.48166e-19	AT3G11920	glutaredoxin-related
POPTR_010G115000v3	344.725	-1.49155	1.74472e-31	AT2G01320	ABC-2 type transporter family protein
POPTR_015G044600v3	165.704	-1.4921	3.16504e-18	AT1G18370	ATP binding microtubule motor family protein
POPTR_017G074600v3	135.267	-1.49284	4.115e-13	AT3G28455	CLAVATA3/ESR-RELATED 25
POPTR_002G110600v3	138.989	-1.49307	9.28028e-15	NA	NA
POPTR_014G028200v3	1055.78	-1.49344	1.07224e-87	NA	NA
POPTR_012G139800v3	392.412	-1.49345	3.45485e-32	NA	NA
POPTR_012G041900v3	892.355	-1.49374	2.40161e-26	NA	NA
POPTR_013G133300v3	463.032	-1.4939	4.07048e-30	NA	NA
POPTR_019G083900v3	216.092	-1.49426	3.25869e-19	NA	NA
POPTR_018G075200v3	1050.49	-1.49434	5.71361e-34	AT3G24500	multiprotein bridging factor 1C
POPTR_010G153000v3	249.855	-1.49616	6.67611e-15	AT3G17360	phragmoplast orienting kinesin 1
POPTR_016G113300v3	907.829	-1.49628	5.63054e-60	NA	NA
POPTR_010G240800v3	471.194	-1.49652	8.62622e-38	AT5G04760	Duplicated homeodomain-like superfamily protein
POPTR_001G102400v3	161.947	-1.49679	2.30262e-14	NA	NA
POPTR_017G107300v3	173.36	-1.49925	1.89202e-12
POPTR_010G206100v3	119.827	-1.49931	1.11333e-16	AT5G59350
POPTR_008G119900v3	107.038	-1.49963	4.47658e-14
POPTR_008G179401v3	885.615	-1.50009	1.19467e-46	AT3G48140	B12D protein
POPTR_002G038500v3	762.31	-1.50037	2.29322e-41	NA	NA
POPTR_003G116600v3	817.162	-1.50128	1.80856e-38	NA	NA
POPTR_001G121700v3	198.715	-1.50167	2.17489e-26	NA	NA
POPTR_009G141800v3	165.836	-1.50191	3.62073e-17
POPTR_011G139800v3	476.058	-1.50334	1.63549e-20	NA	NA
POPTR_005G142200v3	350.15	-1.50473	1.15932e-27	NA	NA
POPTR_015G039000v3	241.242	-1.50483	1.87396e-23	AT3G18000	S-adenosyl-L-methionine-dependent methyltransferases superfamily protein
POPTR_017G013100v3	163.234	-1.50504	1.28107e-21	NA	NA
POPTR_012G136200v3	181.812	-1.50677	3.27419e-18	NA	NA
POPTR_014G115800v3	196.247	-1.50833	1.37054e-15	NA	NA
POPTR_002G106000v3	363.271	-1.50862	3.07854e-24	NA	NA
POPTR_009G084400v3	277.209	-1.5089	1.56256e-31	AT2G16270
POPTR_016G074200v3	115.929	-1.50961	2.98677e-14	NA	NA
POPTR_009G109300v3	3473.26	-1.50971	1.08528e-30	AT2G15960
POPTR_016G080200v3	396.604	-1.51369	4.24646e-29	NA	NA
POPTR_004G217500v3	450.308	-1.51531	6.56234e-26	NA	NA
POPTR_009G103100v3	237.362	-1.51783	3.22885e-34	AT3G19184	AP2/B3-like transcriptional factor family protein
POPTR_004G067700v3	167.516	-1.51837	2.69463e-20
POPTR_006G104300v3	130.927	-1.51859	6.5768e-14	AT3G51740	inflorescence meristem receptor-like kinase 2
POPTR_018G082300v3	195.474	-1.51877	7.93057e-24	AT3G24630	(1 of 1) PTHR34282:SF2 - GENOMIC DNA, CHROMOSOME 3, P1 CLONE:MSD24
POPTR_004G096000v3	731.66	-1.51886	2.42864e-07	AT1G48750	Bifunctional inhibitor/lipid-transfer protein/seed storage 2S albumin superfamily protein
POPTR_001G147500v3	196.475	-1.51991	1.40686e-21	NA	NA
POPTR_001G190800v3	328.458	-1.52009	6.88568e-28	NA	NA
POPTR_001G456400v3	135.743	-1.52022	1.43848e-15
POPTR_005G093200v3	118.017	-1.52384	1.23486e-13	NA	NA
POPTR_017G002400v3	211.65	-1.52529	4.22961e-23	NA	NA
POPTR_014G070000v3	514.951	-1.52554	1.83457e-30
POPTR_009G031800v3	767.663	-1.52559	3.4646e-41	AT2G28950	expansin A6
POPTR_010G000600v3	197.022	-1.5257	6.62911e-22
POPTR_001G450000v3	345.627	-1.52643	1.41867e-20	AT1G32920
POPTR_016G091100v3	624.626	-1.52739	8.24731e-22	NA	NA
POPTR_003G173100v3	1358.81	-1.52764	8.59406e-49	NA	NA
POPTR_007G108500v3	621.304	-1.52794	1.35639e-31	AT1G77120	alcohol dehydrogenase 1
POPTR_006G114600v3	432.848	-1.52989	4.935e-30	AT1G19490	Basic-leucine zipper (bZIP) transcription factor family protein
POPTR_016G053400v3	464.692	-1.53044	6.12283e-39	NA	NA
POPTR_003G100100v3	326.466	-1.53106	6.14001e-36	NA	NA
POPTR_010G078400v3	2218.78	-1.53571	1.97736e-91	AT1G04240	AUX/IAA transcriptional regulator family protein
POPTR_009G027700v3	685.503	-1.53773	4.25366e-16	AT3G46070	C2H2-type zinc finger family protein
POPTR_010G055200v3	968.435	-1.5385	2.94346e-26
POPTR_001G037400v3	128.142	-1.5392	1.33875e-15	NA	NA
POPTR_011G032600v3	217.347	-1.54053	8.27298e-22	NA	NA
POPTR_011G131200v3	104.066	-1.54144	3.6448e-14	NA	NA
POPTR_016G105800v3	253.786	-1.5415	6.5982e-26	NA	NA
POPTR_018G103500v3	285.13	-1.54206	1.70273e-20	NA	NA
POPTR_010G235000v3	141.533	-1.54299	1.98819e-19	AT3G10000	Homeodomain-like superfamily protein
POPTR_013G003700v3	671.562	-1.54312	3.98983e-46	NA	NA
POPTR_008G132400v3	326.422	-1.54333	2.54402e-32	AT1G14900	high mobility group A
POPTR_012G097901v3	1701.44	-1.54402	7.59038e-68	NA	NA
POPTR_017G114800v3	712.247	-1.54521	3.47461e-56	AT5G16120	alpha/beta-Hydrolases superfamily protein
POPTR_006G127800v3	107.783	-1.54662	3.91144e-17	NA	NA
POPTR_006G035400v3	444.642	-1.54689	7.73077e-32	AT5G12250	beta-6 tubulin
POPTR_011G007900v3	407.276	-1.54794	4.14195e-49	AT1G11915	(1 of 1) PTHR33355:SF5 - F12F1.23 PROTEIN
POPTR_012G127500v3	6374.43	-1.54798	3.39846e-65	NA	NA
POPTR_014G017400v3	158.966	-1.54866	2.53514e-19	NA	NA
POPTR_013G020700v3	185.562	-1.54979	4.27263e-18	NA	NA
POPTR_006G199500v3	1571.77	-1.55004	3.88849e-59	NA	NA
POPTR_006G245400v3	19472.4	-1.5505	3.43586e-53	NA	NA
POPTR_002G082000v3	185.402	-1.55156	2.00597e-16	NA	NA
POPTR_006G069100v3	102.371	-1.55227	5.67646e-14
POPTR_014G013600v3	2079.55	-1.55245	5.04277e-40	NA	NA
POPTR_015G138400v3	461.818	-1.55274	7.17691e-25	AT5G52110	Protein of unknown function (DUF2930)
POPTR_016G109700v3	562.11	-1.55299	1.15582e-23	NA	NA
POPTR_002G203500v3	3746.46	-1.55727	1.68255e-15	NA	NA
POPTR_003G091400v3	135.518	-1.55738	1.4845e-10	NA	NA
POPTR_006G263600v3	162.39	-1.56023	1.24067e-11	AT2G25000	WRKY DNA-binding protein 60
POPTR_015G070000v3	1346.41	-1.56423	4.83371e-107	AT1G19050	response regulator 7
POPTR_017G050300v3	2545.37	-1.56441	5.23577e-69	AT5G64310	arabinogalactan protein 1
POPTR_002G072200v3	150.44	-1.56468	3.09557e-22	NA	NA
POPTR_014G070100v3	170.953	-1.56564	3.80527e-25
POPTR_007G038500v3	1324.5	-1.56639	1.647e-44	AT2G23640	Reticulan like protein B13
POPTR_009G097800v3	355.08	-1.56641	5.7313e-34	AT4G34160	CYCLIN D3;1
POPTR_014G102200v3	527.8	-1.56775	3.00926e-32	NA	NA
POPTR_016G124900v3	1488.04	-1.56778	1.03112e-70	NA	NA
POPTR_018G141600v3	172.313	-1.56809	7.1614e-19	NA	NA
POPTR_019G125000v3	2183.61	-1.56911	1.97825e-71	NA	NA
POPTR_007G045200v3	113.943	-1.56953	4.81856e-14	AT4G36945	PLC-like phosphodiesterases superfamily protein
POPTR_014G162000v3	182.818	-1.57138	4.59012e-22	NA	NA
POPTR_012G047200v3	563.6	-1.57225	1.26148e-33	NA	NA
POPTR_008G164250v3	223.823	-1.57336	8.47097e-36
POPTR_006G093900v3	401.774	-1.57371	5.1081e-41	AT3G54030	Protein kinase protein with tetratricopeptide repeat domain
POPTR_003G059200v3	130.388	-1.57422	2.61763e-18	NA	NA
POPTR_004G175400v3	1625.53	-1.57486	1.03064e-59	AT4G38580	farnesylated protein 6
POPTR_008G176000v3	119.086	-1.57557	6.75927e-10	AT1G67480	Galactose oxidase/kelch repeat superfamily protein
POPTR_008G169200v3	100.919	-1.57601	6.84245e-13	AT4G14310	Transducin/WD40 repeat-like superfamily protein
POPTR_007G013300v3	404.825	-1.57608	3.94743e-28	AT1G07660	Histone superfamily protein
POPTR_007G101700v3	1675.3	-1.57749	1.71203e-42	AT5G63910	farnesylcysteine lyase
POPTR_015G120300v3	170.522	-1.57761	3.99132e-18
POPTR_015G004700v3	219.832	-1.5785	3.72249e-22	AT4G00810	60S acidic ribosomal protein family
POPTR_009G156000v3	134.046	-1.57863	1.72912e-17	AT3G44050	P-loop containing nucleoside triphosphate hydrolases superfamily protein
POPTR_017G128600v3	2352.18	-1.58081	1.059e-46	NA	NA
POPTR_002G102100v3	1299.21	-1.58222	3.53279e-23	NA	NA
POPTR_015G135600v3	113.992	-1.58347	1.73298e-13	AT4G23030	MATE efflux family protein
POPTR_010G131100v3	133.308	-1.58367	3.25869e-19	AT1G26100	Cytochrome b561/ferric reductase transmembrane protein family
POPTR_011G149400v3	476.294	-1.58367	4.00437e-27	NA	NA
POPTR_012G126100v3	1058.99	-1.5839	1.27677e-29	NA	NA
POPTR_005G150501v3	138.81	-1.58433	3.4713e-18	NA	NA
POPTR_010G080900v3	357.884	-1.58439	3.76167e-30	AT4G14640	calmodulin 8
POPTR_005G099300v3	123.236	-1.58454	1.25048e-16	NA	NA
POPTR_007G137001v3	418.19	-1.58485	5.46256e-40	NA	NA
POPTR_018G046900v3	384.374	-1.58489	4.65589e-46	AT3G43430	RING/U-box superfamily protein
POPTR_003G117800v3	123.481	-1.58503	2.01995e-21	NA	NA
POPTR_001G167700v3	5192.24	-1.58525	3.00696e-29	NA	NA
POPTR_016G052200v3	393.504	-1.58638	1.1902e-18	NA	NA
POPTR_014G139900v3	873.847	-1.5878	1.59318e-59	NA	NA
POPTR_001G017500v3	239.232	-1.58911	3.12804e-14	AT3G20820	Leucine-rich repeat (LRR) family protein
POPTR_011G050500v3	199.88	-1.59125	2.0246e-27	NA	NA
POPTR_010G108600v3	186.704	-1.59197	1.03677e-13	AT2G01620	RNI-like superfamily protein
POPTR_010G069400v3	199.543	-1.59204	7.44226e-23	AT4G14330	P-loop containing nucleoside triphosphate hydrolases superfamily protein
POPTR_006G175500v3	1253.23	-1.593	1.5958e-25	NA	NA
POPTR_007G014700v3	269.381	-1.59329	4.59471e-29	AT4G36180	Leucine-rich receptor-like protein kinase family protein
POPTR_003G163800v3	673.122	-1.59409	1.12743e-45	NA	NA
POPTR_007G048700v3	164.568	-1.59438	2.34456e-22	AT5G67270	end binding protein 1C
POPTR_002G175200v3	237.197	-1.59519	1.47071e-30	NA	NA
POPTR_005G230100v3	340.154	-1.59531	2.70659e-41	NA	NA
POPTR_014G041000v3	178.954	-1.59551	3.64075e-10	AT5G42610	Protein of unknown function (DUF607)
POPTR_003G122400v3	150.752	-1.59646	1.8577e-23	NA	NA
POPTR_001G360200v3	490.422	-1.59769	5.83205e-20	AT3G20150	Kinesin motor family protein
POPTR_019G013750v3	158.278	-1.60134	6.32465e-14	NA	NA
POPTR_014G024200v3	386.57	-1.60135	5.1776e-33	NA	NA
POPTR_004G088800v3	333.861	-1.60163	3.85321e-39	AT3G03440	ARM repeat superfamily protein
POPTR_015G005500v3	140.613	-1.60188	1.12492e-13
POPTR_004G036350v3	420.368	-1.60432	4.20028e-39
POPTR_016G066700v3	312.566	-1.60442	1.05087e-16	NA	NA
POPTR_009G132500v3	563.721	-1.60524	1.73652e-37	AT4G38660	Pathogenesis-related thaumatin superfamily protein
POPTR_T011201v3	2747.66	-1.60567	4.39797e-36	NA	NA
POPTR_007G146401v3	857.546	-1.60643	5.48526e-56	NA	NA
POPTR_007G090500v3	101.147	-1.60678	1.57837e-15	AT5G10110
POPTR_003G100500v3	264.526	-1.60697	3.824e-25	NA	NA
POPTR_006G258600v3	111.258	-1.60816	3.46215e-11	AT5G25280	serine-rich protein-related
POPTR_018G057700v3	174.209	-1.60975	8.55183e-21	AT4G32830	ataurora1
POPTR_010G251800v3	183.424	-1.61069	7.18404e-21	NA	NA
POPTR_019G116500v3	194.571	-1.61121	1.70747e-24	NA	NA
POPTR_001G136400v3	109.59	-1.61124	1.09361e-16	NA	NA
POPTR_017G055800v3	124.705	-1.61137	6.25707e-16
POPTR_012G038400v3	103.641	-1.6152	2.25141e-10	NA	NA
POPTR_010G047900v3	132.215	-1.6159	1.07775e-21	NA	NA
POPTR_014G155900v3	129.667	-1.61592	5.80739e-17	NA	NA
POPTR_014G099000v3	1255.19	-1.61632	4.22742e-34	AT2G46500	phosphoinositide 4-kinase gamma 4
POPTR_003G052800v3	454.295	-1.61648	5.56962e-28	AT3G16120	Dynein light chain type 1 family protein
POPTR_015G072400v3	283.898	-1.6189	3.10109e-32
POPTR_004G007500v3	246.667	-1.62185	7.00095e-12	AT4G04450	WRKY family transcription factor
POPTR_018G078801v3	1205.13	-1.62396	9.9986e-10
POPTR_004G157300v3	713.608	-1.62461	1.88816e-41	AT4G34560	(1 of 11) PF14364 - Domain of unknown function (DUF4408) (DUF4408)
POPTR_010G102300v3	1072.14	-1.62532	7.39211e-65	AT2G01850	endoxyloglucan transferase A3
POPTR_006G035300v3	267.775	-1.62594	7.89344e-32	AT3G56480	myosin heavy chain-related
POPTR_006G210700v3	181.548	-1.6262	6.40638e-22	NA	NA
POPTR_005G195800v3	600.457	-1.62699	5.23438e-40	NA	NA
POPTR_011G020900v3	347.422	-1.62783	2.97154e-50	AT1G05010	ethylene-forming enzyme
POPTR_005G160800v3	188.82	-1.62795	5.25705e-21	NA	NA
POPTR_017G029700v3	729.291	-1.62858	3.07103e-60	AT2G43290	Calcium-binding EF-hand family protein
POPTR_014G078700v3	895.267	-1.62865	2.77405e-31	AT3G61190	BON association protein 1
POPTR_004G036375v3	1390.81	-1.62867	3.51591e-66
POPTR_001G116500v3	472.361	-1.62887	5.90629e-52	NA	NA
POPTR_005G069500v3	5346.1	-1.62958	4.47625e-164	NA	NA
POPTR_001G336766v3	202.053	-1.62993	3.86619e-20	AT5G40720	Domain of unknown function (DUF23)
POPTR_005G055300v3	439.736	-1.63147	7.49928e-26	NA	NA
POPTR_016G003700v3	525.097	-1.63235	1.30198e-26	AT5G47800	Phototropic-responsive NPH3 family protein
POPTR_010G193500v3	425.915	-1.63417	1.18704e-56	AT2G39920	HAD superfamily, subfamily IIIB acid phosphatase
POPTR_008G030600v3	164.771	-1.63422	2.43e-21	AT2G37470	Histone superfamily protein
POPTR_009G005800v3	101.101	-1.63585	6.09169e-13	NA	NA
POPTR_008G081300v3	191.507	-1.63685	5.337e-20	AT1G79380	Ca(2)-dependent phospholipid-binding protein (Copine) family
POPTR_018G111400v3	184.914	-1.63759	1.51956e-21	NA	NA
POPTR_010G144900v3	913.75	-1.63896	1.63042e-32	AT1G05770	Mannose-binding lectin superfamily protein
POPTR_003G138000v3	323.893	-1.63913	1.00479e-28	NA	NA
POPTR_014G104200v3	2936.63	-1.63935	2.10102e-87	NA	NA
POPTR_017G134800v3	258.46	-1.64052	2.78782e-26	NA	NA
POPTR_001G307200v3	419.352	-1.64061	1.55057e-31	AT4G39330	cinnamyl alcohol dehydrogenase 9
POPTR_012G145200v3	128.045	-1.64116	9.10039e-20	NA	NA
POPTR_009G089200v3	107.446	-1.6418	2.4252e-10	AT1G49910	Transducin/WD40 repeat-like superfamily protein
POPTR_003G154400v3	422.965	-1.6429	6.41057e-43	NA	NA
POPTR_010G133600v3	488.707	-1.6449	1.42623e-56	AT3G25590
POPTR_015G099700v3	145.749	-1.64536	6.11752e-20	AT5G50720	HVA22 homologue E
POPTR_013G147500v3	168.107	-1.64676	4.77765e-18	NA	NA
POPTR_001G198900v3	397.407	-1.6468	8.76847e-33	NA	NA
POPTR_001G467600v3	550.757	-1.64834	3.96415e-36	AT3G44730	kinesin-like protein 1
POPTR_004G118700v3	168.961	-1.65035	5.61929e-30	AT3G01015	TPX2 (targeting protein for Xklp2) protein family
POPTR_017G090300v3	452.33	-1.65092	4.37404e-33	AT5G39360	EID1-like 2
POPTR_003G187500v3	204.777	-1.65184	1.7801e-26	NA	NA
POPTR_010G141300v3	222.103	-1.65247	1.913e-29	AT4G16146	cAMP-regulated phosphoprotein 19-related protein
POPTR_001G296400v3	109.728	-1.65262	8.90583e-10	AT4G33905	Peroxisomal membrane 22 kDa (Mpv17/PMP22) family protein
POPTR_001G352400v3	255.938	-1.65282	8.22342e-13	AT5G46350	WRKY DNA-binding protein 8
POPTR_002G168700v3	415.144	-1.65334	1.89265e-16	AT4G23810	WRKY family transcription factor
POPTR_017G032200v3	140.39	-1.65466	3.03198e-17	AT2G43330	inositol transporter 1
POPTR_008G047500v3	697.401	-1.65554	1.26499e-33	AT1G07660	Histone superfamily protein
POPTR_013G135600v3	924.037	-1.65849	2.88793e-19	NA	NA
POPTR_010G093000v3	194.673	-1.65889	2.13798e-20	AT1G14350	Duplicated homeodomain-like superfamily protein
POPTR_006G039200v3	352.226	-1.65942	2.23551e-43
POPTR_015G099800v3	540.009	-1.65989	3.03712e-34	AT5G50610	(1 of 11) PF14364 - Domain of unknown function (DUF4408) (DUF4408)
POPTR_005G258300v3	256.79	-1.66119	1.0949e-20	NA	NA
POPTR_009G080600v3	902.991	-1.66127	3.04211e-09
POPTR_016G024900v3	553.325	-1.66169	8.24488e-52	NA	NA
POPTR_009G028800v3	5259.39	-1.66245	7.42058e-62	AT2G28790	Pathogenesis-related thaumatin superfamily protein
POPTR_018G096042v3	415.303	-1.66392	5.67592e-40	AT5G57630	CBL-interacting protein kinase 21
POPTR_016G014600v3	682.218	-1.66449	2.09137e-41	NA	NA
POPTR_005G070900v3	1023.48	-1.66508	6.43464e-35	NA	NA
POPTR_002G060500v3	630.956	-1.66628	1.56188e-44	NA	NA
POPTR_001G272000v3	347.469	-1.66643	6.59893e-27	AT2G26760	Cyclin B1;4
POPTR_006G001301v3	249.961	-1.66699	2.05422e-23	NA	NA
POPTR_008G062000v3	149.808	-1.66822	2.12878e-21	AT5G05940	ROP guanine nucleotide exchange factor 5
POPTR_005G106400v3	274.989	-1.66864	8.25568e-20	NA	NA
POPTR_006G144900v3	164.061	-1.66899	8.56527e-18	NA	NA
POPTR_016G035400v3	185.106	-1.67093	4.46592e-24	NA	NA
POPTR_003G079500v3	1600.49	-1.67352	1.05344e-126	NA	NA
POPTR_005G002100v3	382.901	-1.67452	1.08716e-24	NA	NA
POPTR_002G151700v3	335.292	-1.6752	8.70544e-45	AT2G45660	AGAMOUS-like 20
POPTR_008G062350v3	117.899	-1.67538	2.80226e-18	AT1G53540	HSP20-like chaperones superfamily protein
POPTR_019G051200v3	524.155	-1.67808	1.3023e-42	NA	NA
POPTR_013G083500v3	1120.46	-1.67881	9.4427e-33
POPTR_003G160600v3	204.303	-1.67972	2.19374e-25	NA	NA
POPTR_001G240900v3	2615.19	-1.68088	1.00497e-65	AT2G28950	expansin A6
POPTR_006G093500v3	112.52	-1.68372	1.37291e-13
POPTR_006G196900v3	1014.68	-1.68407	1.67768e-55	NA	NA
POPTR_003G042700v3	167.614	-1.6856	4.73165e-33	AT1G17480	IQ-domain 7
POPTR_018G116000v3	110.147	-1.68645	5.19961e-15	NA	NA
POPTR_017G129200v3	351.837	-1.6865	1.42914e-33	NA	NA
POPTR_004G042700v3	187.37	-1.68713	1.10529e-33
POPTR_008G101400v3	199.214	-1.69016	1.95547e-26	AT5G49620	myb domain protein 78
POPTR_004G234300v3	264.033	-1.69128	1.3416e-31	NA	NA
POPTR_018G097700v3	1502.68	-1.69177	2.55739e-102	AT2G18700	trehalose phosphatase/synthase 11
POPTR_004G230000v3	221.233	-1.69183	1.03158e-20	NA	NA
POPTR_013G086500v3	377.574	-1.69256	4.24365e-48	AT5G16480	Phosphotyrosine protein phosphatases superfamily protein
POPTR_018G036400v3	774.82	-1.6936	1.87923e-88	AT5G25590	Protein of unknown function (DUF630 and DUF632)
POPTR_002G167100v3	598.845	-1.69478	6.52021e-39	AT2G46270	G-box binding factor 3
POPTR_013G062301v3	167.297	-1.69546	1.76399e-20
POPTR_003G068900v3	806.459	-1.69747	2.67881e-28	NA	NA
POPTR_005G049300v3	753.559	-1.69892	6.44392e-34	NA	NA
POPTR_001G061100v3	551.708	-1.69894	2.22212e-37	NA	NA
[truncated: 650 more rows]

## Sheet: Tab S. 8
Table S8. List of differentially expressed genes (DEGs) detected in cambium and differentiating xylem tissues isolated from 4-years-old transgenic aspen Line 4 growing in the field conditions with PANTHER family/subfamily annotation.
Mapped IDs	Gene name	PANTHER family/subfamily
POPTR_012G038400v3	Uncharacterized protein;POPTR_012G038400;PTN002302951;orthologs	CYSTEINE/HISTIDINE-RICH C1 DOMAIN FAMILY PROTEIN (PTHR46288:SF56)
POPTR_003G059200v3	Hydrolase_4 domain-containing protein;POPTR_003G059200;PTN001699468;orthologs	CAFFEOYLSHIKIMATE ESTERASE (PTHR11614:SF163)
POPTR_005G020300v3	J domain-containing protein;POPTR_005G020300;PTN002376069;orthologs	PUTATIVE, EXPRESSED-RELATED (PTHR44743:SF11)
POPTR_008G089000v3	NAC domain-containing protein;POPTR_008G089000;PTN002421415;orthologs	NAC DOMAIN-CONTAINING PROTEIN 2 (PTHR31719:SF127)
POPTR_002G255800v3	Uncharacterized protein;POPTR_002G255800;PTN004682793;orthologs	ABC TRANSPORTER C FAMILY MEMBER 5 (PTHR24223:SF189)
POPTR_008G179800v3	Uncharacterized protein;POPTR_008G179800;PTN007613289;orthologs	F-BOX PROTEIN SKIP14 (PTHR13382:SF22)
POPTR_014G129000v3	Hydrolase_4 domain-containing protein;POPTR_014G129000;PTN004276979;orthologs	ALPHA/BETA-HYDROLASES SUPERFAMILY PROTEIN (PTHR11614:SF88)
POPTR_011G057800v3	TPT domain-containing protein;POPTR_011G057800;PTN007489330;orthologs	TRIOSE PHOSPHATE/PHOSPHATE TRANSLOCATOR TPT, CHLOROPLASTIC (PTHR11132:SF269)
POPTR_009G108500v3	Uncharacterized protein;POPTR_009G108500;PTN002423073;orthologs	B3 DOMAIN-CONTAINING TRANSCRIPTION FACTOR VRN1 (PTHR31920:SF37)
POPTR_009G027000v3	50S ribosomal protein L23, chloroplastic;POPTR_009G027000;PTN002267322;orthologs	60S RIBOSOMAL PROTEIN L23A (PTHR11620:SF99)
POPTR_009G092900v3	Uncharacterized protein;POPTR_009G092900;PTN004896337;orthologs	GH3 DOMAIN-CONTAINING PROTEIN (PTHR31901:SF9)
POPTR_008G083100v3	Uncharacterized protein;POPTR_008G083100;PTN004221960;orthologs	METAL TRANSPORT PROTEIN (PTHR11040:SF202)
POPTR_008G120900v3	Uncharacterized protein;POPTR_008G120900;PTN002066361;orthologs	EXPRESSED PROTEIN (PTHR31769:SF5)
POPTR_019G042500v3	Uncharacterized protein;POPTR_019G042500;PTN002439993;orthologs	PROTEIN CDI (PTHR35105:SF2)
POPTR_017G081000v3	Tubulin alpha chain;POPTR_017G081000;PTN004272510;orthologs	TUBULIN ALPHA CHAIN (PTHR11588:SF350)
POPTR_004G055000v3	PMR5N domain-containing protein;POPTR_004G055000;PTN007953889;orthologs	PROTEIN TRICHOME BIREFRINGENCE-LIKE 37 (PTHR32285:SF42)
POPTR_001G345500v3	Uncharacterized protein;POPTR_001G345500;PTN001968943;orthologs	MITOGEN-ACTIVATED PROTEIN KINASE KINASE 3 (PTHR48013:SF27)
POPTR_007G107600v3	J domain-containing protein;POPTR_007G107600;PTN002556667;orthologs	J DOMAIN-CONTAINING PROTEIN (PTHR45432:SF6)
POPTR_008G027600v3	ZnMc domain-containing protein;POPTR_008G027600;PTN004133399;orthologs	ZNMC DOMAIN-CONTAINING PROTEIN (PTHR10201:SF311)
POPTR_011G042800v3	F-box domain-containing protein;POPTR_011G042800;PTN005035065;orthologs	F-BOX PROTEIN SKIP27 (PTHR34049:SF1)
POPTR_005G226000v3	Methyltransferase;POPTR_005G226000;PTN001603519;orthologs	METHYLTRANSFERASE PMT8-RELATED (PTHR10108:SF1120)
POPTR_001G182700v3	Uncharacterized protein;POPTR_001G182700;PTN002306828;orthologs	SUBFAMILY NOT NAMED (PTHR14255:SF24)
POPTR_009G092300v3	Uncharacterized protein;POPTR_009G092300;PTN002202255;orthologs	CLASSICAL ARABINOGALACTAN PROTEIN 9 (PTHR37209:SF1)
POPTR_005G240700v3	J domain-containing protein;POPTR_005G240700;PTN002545557;orthologs	CHAPERONE PROTEIN DNAJ 11, CHLOROPLASTIC-LIKE (PTHR44240:SF22)
POPTR_017G130800v3	Uncharacterized protein;POPTR_017G130800;PTN002424807;orthologs	PLASMODESMATA-LOCATED PROTEIN 7 (PTHR32080:SF3)
POPTR_005G070900v3	Diacylglycerol kinase;POPTR_005G070900;PTN001679703;orthologs	DIACYLGLYCEROL KINASE 2 (PTHR11255:SF104)
POPTR_019G051200v3	Uncharacterized protein;POPTR_019G051200;PTN002027427;orthologs	PLATZ TRANSCRIPTION FACTOR FAMILY PROTEIN (PTHR31065:SF57)
POPTR_010G102900v3	Histidine kinase;CRE1B;PTN001976479;orthologs	HISTIDINE KINASE 4 (PTHR43719:SF51)
POPTR_002G102100v3	Protein DETOXIFICATION;POPTR_002G102100;PTN001676028;orthologs	PROTEIN DETOXIFICATION (PTHR11206:SF194)
POPTR_011G151600v3	Uncharacterized protein;POPTR_011G151600;PTN002132618;orthologs	AVR9/CF-9 RAPIDLY ELICITED PROTEIN (PTHR33641:SF15)
POPTR_007G071300v3	Photosystem II stability/assembly factor;POPTR_007G071300;PTN002077871;orthologs	PHOTOSYSTEM II STABILITY/ASSEMBLY FACTOR HCF136, CHLOROPLASTIC (PTHR47199:SF2)
POPTR_014G044500v3	Uncharacterized protein;POPTR_014G044500;PTN002438381;orthologs	FERREDOXIN-LIKE PROTEIN (PTHR34537:SF2)
POPTR_006G021600v3	CYSTM domain-containing protein;POPTR_006G021600;PTN002054105;orthologs	CYSTEINE-RICH/TRANSMEMBRANE DOMAIN A-LIKE PROTEIN (PTHR31568:SF111)
POPTR_003G147300v3	BHLH domain-containing protein;POPTR_003G147300;PTN001692175;orthologs	BHLH DOMAIN-CONTAINING PROTEIN (PTHR11514:SF115)
POPTR_003G207600v3	Uncharacterized protein;POPTR_003G207600;PTN002436405;orthologs	OS02G0717600 PROTEIN (PTHR33984:SF2)
POPTR_010G046300v3	Phosphate transporter;POPTR_010G046300;PTN002254686;orthologs	PHOSPHATE TRANSPORTER (PTHR11101:SF80)
POPTR_014G115500v3	Protein-serine/threonine phosphatase;POPTR_014G115500;PTN001790857;orthologs	PROTEIN PHOSPHATASE 2C 49-RELATED (PTHR13832:SF165)
POPTR_015G039000v3	Uncharacterized protein;POPTR_015G039000;PTN008130885;orthologs	PHOSPHOETHANOLAMINE METHYLTRANSFERASE (PTHR44307:SF2)
POPTR_001G236400v3	ADF-H domain-containing protein;POPTR_001G236400;PTN007548475;orthologs	ACTIN-DEPOLYMERIZING FACTOR 1-RELATED (PTHR11913:SF112)
POPTR_019G055600v3	MFS domain-containing protein;POPTR_019G055600;PTN008282701;orthologs	D-XYLOSE-PROTON SYMPORTER-LIKE 2 (PTHR48023:SF4)
POPTR_003G068900v3	Tify domain-containing protein;POPTR_003G068900;PTN002101010;orthologs	PROTEIN TIFY 11A (PTHR33077:SF52)
POPTR_011G123300v3	NAC domain-containing protein;POPTR_011G123300;PTN002063681;orthologs	NAC DOMAIN-CONTAINING PROTEIN 55 (PTHR31719:SF172)
POPTR_001G271700v3	Mitogen-activated protein kinase;POPTR_001G271700;PTN001935310;orthologs	MITOGEN-ACTIVATED PROTEIN KINASE 3 (PTHR24055:SF391)
POPTR_013G062200v3	Uncharacterized protein;POPTR_013G062200;PTN002439568;orthologs	DEHYDRIN HIRD11 (PTHR34941:SF1)
POPTR_002G102700v3	Uncharacterized protein;POPTR_002G102700;PTN002539635;orthologs	TRANSPORT INHIBITOR RESPONSE 1-LIKE PROTEIN (PTHR16134:SF36)
POPTR_009G079500v3	Uncharacterized protein;POPTR_009G079500;PTN001861272;orthologs	OLIGOPEPTIDE TRANSPORTER 4 (PTHR22601:SF11)
POPTR_014G041200v3	SAP30_Sin3_bdg domain-containing protein;POPTR_014G041200;PTN002297075;orthologs	HISTONE DEACETYLASE COMPLEX SUBUNIT (PTHR13286:SF6)
POPTR_014G021800v3	Uncharacterized protein;POPTR_014G021800;PTN002387035;orthologs	CYTOCHROME P450 FAMILY PROTEIN (PTHR47947:SF20)
POPTR_008G151800v3	PABS domain-containing protein;POPTR_008G151800;PTN001695200;orthologs	SPERMINE SYNTHASE (PTHR43317:SF9)
POPTR_004G034400v3	F-box domain-containing protein;POPTR_004G034400;PTN002146213;orthologs	F-BOX PROTEIN SKIP27 (PTHR34049:SF1)
POPTR_004G086400v3	(1-3)-beta-glucan endohydrolase;POPTR_004G086400;PTN004931832;orthologs	GLUCAN ENDO-1,3-BETA-GLUCOSIDASE 2 (PTHR32227:SF52)
POPTR_010G055400v3	Glyceraldehyde-3-phosphate dehydrogenase;POPTR_010G055400;PTN001652500;orthologs	GLYCERALDEHYDE-3-PHOSPHATE DEHYDROGENASE (PTHR10836:SF129)
POPTR_001G107300v3	Uncharacterized protein;POPTR_001G107300;PTN002775996;orthologs	DEAD-BOX ATP-DEPENDENT RNA HELICASE 33-RELATED (PTHR24031:SF324)
POPTR_002G130700v3	Uncharacterized protein;POPTR_002G130700;PTN001958068;orthologs	ALLENE OXIDE SYNTHASE, CHLOROPLASTIC (PTHR24286:SF255)
POPTR_002G047500v3	Calcium-transporting ATPase;POPTR_002G047500;PTN002378602;orthologs	CALCIUM-TRANSPORTING ATPASE 12, PLASMA MEMBRANE-TYPE (PTHR24093:SF455)
POPTR_013G161600v3	2OG-FeII_Oxy_2 domain-containing protein;POPTR_013G161600;PTN001772672;orthologs	ALPHA-KETOGLUTARATE-DEPENDENT DIOXYGENASE ALKB HOMOLOG 6 (PTHR46030:SF1)
POPTR_004G172800v3	Aa_trans domain-containing protein;POPTR_004G172800;PTN001881505;orthologs	AUXIN TRANSPORTER-LIKE PROTEIN 2 (PTHR48017:SF65)
POPTR_004G134000v3	DNA (cytosine-5)-methyltransferase;POPTR_004G134000;PTN007450778;orthologs	DNA (CYTOSINE-5)-METHYLTRANSFERASE 1 (PTHR10629:SF52)
POPTR_016G142800v3	Protein kinase domain-containing protein;POPTR_016G142800;PTN002373116;orthologs	CYCLIN-DEPENDENT KINASE 2 (PTHR24056:SF254)
POPTR_001G140200v3	Uncharacterized protein;POPTR_001G140200;PTN001761923;orthologs	SNARE ASSOCIATED GOLGI PROTEIN FAMILY (PTHR43220:SF7)
POPTR_003G067800v3	Uncharacterized protein;POPTR_003G067800;PTN002104271;orthologs	DUF1677 FAMILY PROTEIN (DUF1677) (PTHR33108:SF32)
POPTR_015G075200v3	Protein kinase domain-containing protein;POPTR_015G075200;PTN004622223;orthologs	PROTEIN KINASE DOMAIN-CONTAINING PROTEIN (PTHR23257:SF788)
POPTR_008G192100v3	Uncharacterized protein;POPTR_008G192100;PTN002417166;orthologs	TORTIFOLIA1-LIKE PROTEIN 4 (PTHR31355:SF8)
POPTR_004G089100v3	Protein kinase domain-containing protein;POPTR_004G089100;PTN002405679;orthologs	PROTEIN KINASE SUPERFAMILY PROTEIN (PTHR27001:SF707)
POPTR_005G180200v3	NAC domain-containing protein;POPTR_005G180200;PTN002063737;orthologs	NAC DOMAIN-CONTAINING PROTEIN 2 (PTHR31719:SF183)
POPTR_004G234300v3	Uncharacterized protein;POPTR_004G234300;PTN008062077;orthologs	OS01G0962100 PROTEIN (PTHR36073:SF1)
POPTR_001G296400v3	Uncharacterized protein;POPTR_001G296400;PTN007500650;orthologs	OS12G0508100 PROTEIN (PTHR11266:SF18)
POPTR_014G097100v3	Uncharacterized protein;POPTR_014G097100;PTN002034811;orthologs	ABSCISIC ACID RECEPTOR PYL9 (PTHR31213:SF99)
POPTR_011G095600v3	Fe2OG dioxygenase domain-containing protein;POPTR_011G095600;PTN001611115;orthologs	GIBBERELLIN 2-BETA-DIOXYGENASE 1 (PTHR47990:SF150)
POPTR_008G144800v3	Uncharacterized protein;POPTR_008G144800;PTN005299740;orthologs	F26K24.21 PROTEIN (PTHR46361:SF1)
POPTR_002G224600v3	(1-3)-beta-glucan endohydrolase;POPTR_002G224600;PTN002426508;orthologs	GLUCAN ENDO-1,3-BETA-D-GLUCOSIDASE (PTHR32227:SF320)
POPTR_010G065400v3	TPR_REGION domain-containing protein;POPTR_010G065400;PTN002402649;orthologs	N-ACETYLGLUCOSAMINE TRANSFERASE, OGT PROTEIN, PUTATIVE-RELATED (PTHR26312:SF217)
POPTR_005G140300v3	Uncharacterized protein;POPTR_005G140300;PTN004841696;orthologs	FILAMENT-LIKE PLANT PROTEIN 7 (PTHR31580:SF22)
POPTR_006G082900v3	Kinesin motor domain-containing protein;POPTR_006G082900;PTN002380207;orthologs	KINESIN FAMILY MEMBER 11 (PTHR47970:SF12)
POPTR_004G005900v3	Uncharacterized protein;POPTR_004G005900;PTN007599836;orthologs	PROTEIN OSCA1 (PTHR13018:SF93)
POPTR_010G185300v3	Protein kinase domain-containing protein;POPTR_010G185300;PTN002405714;orthologs	OS05G0471000 PROTEIN (PTHR46084:SF4)
POPTR_005G100000v3	B-like cyclin;POPTR_005G100000;PTN002229054;orthologs	CYCLIN-B2-2 (PTHR10177:SF261)
POPTR_016G001100v3	HTH myb-type domain-containing protein;POPTR_016G001100;PTN002042215;orthologs	MYB FAMILY TRANSCRIPTION FACTOR PHL7 (PTHR31314:SF5)
POPTR_007G077000v3	S-acyltransferase;POPTR_007G077000;PTN007715743;orthologs	S-ACYLTRANSFERASE (PTHR22883:SF440)
POPTR_011G131200v3	Protein kinase domain-containing protein;POPTR_011G131200;PTN001992105;orthologs	CALCIUM/CALMODULIN-REGULATED RECEPTOR-LIKE KINASE 1 (PTHR27001:SF909)
POPTR_002G169800v3	Uncharacterized protein;POPTR_002G169800;PTN002776030;orthologs	ATP-DEPENDENT RNA HELICASE MSS116, MITOCHONDRIAL (PTHR24031:SF384)
POPTR_014G068200v3	Transketolase;POPTR_014G068200;PTN008110697;orthologs	TRANSKETOLASE 1-RELATED (PTHR43522:SF2)
POPTR_017G120800v3	Mitochondrial inner membrane protease ATP23;POPTR_017G120800;PTN002330884;orthologs	MITOCHONDRIAL INNER MEMBRANE PROTEASE ATP23 HOMOLOG (PTHR21711:SF0)
POPTR_003G055000v3	LEA_2 domain-containing protein;POPTR_003G055000;PTN007923121;orthologs	LEA_2 DOMAIN-CONTAINING PROTEIN (PTHR31852:SF266)
POPTR_005G209500v3	Epimerase domain-containing protein;POPTR_005G209500;PTN005180028;orthologs	CHLOROPLAST STEM-LOOP BINDING PROTEIN OF 41 KDA A, CHLOROPLASTIC (PTHR43725:SF6)
POPTR_014G109100v3	Metallophos domain-containing protein;POPTR_014G109100;PTN004945258;orthologs	PHOSPHATASE DCR2-RELATED (PTHR32440:SF0)
POPTR_009G037300v3	Protein-serine/threonine phosphatase;POPTR_009G037300;PTN004439495;orthologs	PROTEIN PHOSPHATASE 2C 24-RELATED (PTHR47992:SF40)
POPTR_005G245300v3	Fe2OG dioxygenase domain-containing protein;POPTR_005G245300;PTN002247809;orthologs	FE2OG DIOXYGENASE DOMAIN-CONTAINING PROTEIN (PTHR10869:SF217)
POPTR_013G127800v3	Cysteine synthase;POPTR_013G127800;PTN002232465;orthologs	CYSTEINE SYNTHASE 1 (PTHR10314:SF241)
POPTR_016G063100v3	Uncharacterized protein;POPTR_016G063100;PTN001645212;orthologs	40S RIBOSOMAL PROTEIN S28 (PTHR10769:SF3)
POPTR_014G117000v3	Uncharacterized protein;POPTR_014G117000;PTN002240041;orthologs	ATMYB2 (PTHR45675:SF31)
POPTR_016G014900v3	BAG domain-containing protein;POPTR_016G014900;PTN002432824;orthologs	BAG FAMILY MOLECULAR CHAPERONE REGULATOR 5, MITOCHONDRIAL (PTHR33322:SF8)
POPTR_008G025700v3	Uncharacterized protein;POPTR_008G025700;PTN005105467;orthologs	TRANSMEMBRANE PROTEIN (PTHR36789:SF1)
POPTR_018G133500v3	Transmembrane protein 230;POPTR_018G133500;PTN001812425;orthologs	TRANSMEMBRANE PROTEIN 230 (PTHR15664:SF6)
POPTR_006G237200v3	Hydrolase_4 domain-containing protein;POPTR_006G237200;PTN007518414;orthologs	ALPHA/BETA-HYDROLASES SUPERFAMILY PROTEIN (PTHR11614:SF143)
POPTR_001G393800v3	Uncharacterized protein;POPTR_001G393800;PTN001631928;orthologs	9-CIS-EPOXYCAROTENOID DIOXYGENASE NCED3, CHLOROPLASTIC (PTHR10543:SF26)
POPTR_009G060800v3	Cellulose synthase;POPTR_009G060800;PTN001778848;orthologs	CELLULOSE SYNTHASE A CATALYTIC SUBUNIT 8 [UDP-FORMING]-RELATED (PTHR13301:SF206)
POPTR_001G110800v3	AP2/ERF domain-containing protein;POPTR_001G110800;PTN004888039;orthologs	DEHYDRATION-RESPONSIVE ELEMENT-BINDING PROTEIN 1F (PTHR31839:SF25)
POPTR_002G065200v3	Uncharacterized protein;POPTR_002G065200;PTN007987325;orthologs	OS06G0686600 PROTEIN (PTHR33193:SF7)
POPTR_001G332300v3	Lipase;POPTR_001G332300;PTN001662909;orthologs	TRIACYLGLYCEROL LIPASE 2 (PTHR11005:SF99)
POPTR_006G122000v3	Pectate lyase;POPTR_006G122000;PTN004863116;orthologs	PECTATE LYASE 12-RELATED (PTHR31683:SF21)
POPTR_012G042100v3	SANT domain-containing protein;POPTR_012G042100;PTN004832100;orthologs	TRANSCRIPTION REPRESSOR KAN1-LIKE ISOFORM X1 (PTHR31496:SF53)
POPTR_012G127500v3	PMEI domain-containing protein;POPTR_012G127500;PTN002028457;orthologs	PECTINESTERASE INHIBITOR 7 (PTHR31080:SF87)
POPTR_006G056000v3	Uncharacterized protein;POPTR_006G056000;PTN002435032;orthologs	SUBFAMILY NOT NAMED (PTHR33659:SF11)
POPTR_008G049500v3	STAS domain-containing protein;POPTR_008G049500;PTN002273900;orthologs	SODIUM-INDEPENDENT SULFATE ANION TRANSPORTER (PTHR11814:SF55)
POPTR_002G064000v3	Uncharacterized protein;POPTR_002G064000;PTN002465502;orthologs	TRYPTOPHAN AMINOTRANSFERASE-RELATED PROTEIN 4 (PTHR43795:SF20)
POPTR_014G024200v3	WRKY family protein;POPTR_014G024200;PTN007862636;orthologs	WRKY TRANSCRIPTION FACTOR 1 (PTHR31282:SF133)
POPTR_013G083500v3	Uncharacterized protein;POPTR_013G083500;;orthologs
POPTR_012G058300v3	Uncharacterized protein;POPTR_012G058300;PTN002061685;orthologs	OS01G0642600 PROTEIN (PTHR31696:SF23)
POPTR_007G084800v3	Uncharacterized protein;POPTR_007G084800;PTN002386944;orthologs	CYTOCHROME P450 FAMILY 71 PROTEIN (PTHR47943:SF2)
POPTR_007G022000v3	Mannan endo-1,4-beta-mannosidase;POPTR_007G022000;PTN004827469;orthologs	MANNAN ENDO-1,4-BETA-MANNOSIDASE 7 (PTHR31451:SF64)
POPTR_008G018400v3	BZIP family protein;POPTR_008G018400;PTN002343004;orthologs	B-ZIP PROTEIN (PTHR46835:SF4)
POPTR_009G087000v3	MYB transcription factor;POPTR_009G087000;PTN002330968;orthologs	TELOMERE REPEAT-BINDING FACTOR 1 (PTHR46267:SF8)
POPTR_005G014700v3	Receptor-like serine/threonine-protein kinase;POPTR_005G014700;PTN007811985;orthologs	RECEPTOR-LIKE SERINE/THREONINE-PROTEIN KINASE (PTHR27002:SF925)
POPTR_010G108200v3	Tify domain-containing protein;POPTR_010G108200;PTN007971219;orthologs	PROTEIN TIFY 7 (PTHR33077:SF90)
POPTR_008G134100v3	Uncharacterized protein;POPTR_008G134100;PTN002164501;orthologs	BNAA07G38580D PROTEIN (PTHR34780:SF2)
POPTR_019G090500v3	Uncharacterized protein;POPTR_019G090500;PTN002139769;orthologs	SIGNALING PEPTIDE TAXIMIN 1 (PTHR33834:SF2)
POPTR_006G234500v3	Uncharacterized protein;POPTR_006G234500;PTN007887748;orthologs	EPHRIN TYPE-B RECEPTOR (PTHR31513:SF1)
POPTR_004G140100v3	RING-type E3 ubiquitin transferase;POPTR_004G140100;PTN001872542;orthologs	U-BOX DOMAIN-CONTAINING PROTEIN 26 (PTHR22849:SF112)
POPTR_013G109400v3	dNK domain-containing protein;POPTR_013G109400;PTN004164885;orthologs	DEOXYADENOSINE KINASE (PTHR10513:SF35)
POPTR_011G110200v3	Bulb-type lectin domain-containing protein;POPTR_011G110200;PTN002089819;orthologs	BULB-TYPE LECTIN DOMAIN-CONTAINING PROTEIN (PTHR32444:SF132)
POPTR_013G038100v3	Uncharacterized protein;POPTR_013G038100;PTN007481017;orthologs	POLLEN-SPECIFIC PROTEIN SF21-LIKE ISOFORM X1 (PTHR11034:SF61)
POPTR_005G040800v3	Histone H2A;POPTR_005G040800;PTN001919569;orthologs	HISTONE H2AXA-RELATED (PTHR23430:SF366)
POPTR_015G098900v3	SBP-type domain-containing protein;POPTR_015G098900;PTN004792624;orthologs	SQUAMOSA PROMOTER-BINDING-LIKE PROTEIN 13A-RELATED (PTHR31251:SF169)
POPTR_010G042100v3	Uncharacterized protein;POPTR_010G042100;PTN004815895;orthologs	PECTIN LYASE-LIKE SUPERFAMILY PROTEIN (PTHR31375:SF91)
POPTR_018G103300v3	DNA-directed RNA polymerase;POPTR_018G103300;PTN001602023;orthologs	DNA-DIRECTED RNA POLYMERASE 3, CHLOROPLASTIC (PTHR10102:SF1)
POPTR_014G049000v3	Uncharacterized protein;POPTR_014G049000;;orthologs
POPTR_018G019800v3	WRKY domain-containing protein;POPTR_018G019800;PTN002418029;orthologs	WRKY FAMILY TRANSCRIPTION FACTOR (PTHR31429:SF76)
POPTR_002G040200v3	WAT1-related protein;POPTR_002G040200;PTN002415317;orthologs	WAT1-RELATED PROTEIN (PTHR31218:SF196)
POPTR_004G065200v3	(S)-2-hydroxy-acid oxidase;POPTR_004G065200;PTN001633586;orthologs	FMN HYDROXY ACID DEHYDROGENASE DOMAIN-CONTAINING PROTEIN (PTHR10578:SF107)
POPTR_003G121400v3	Protein DETOXIFICATION;POPTR_003G121400;PTN001675888;orthologs	PROTEIN DETOXIFICATION (PTHR11206:SF103)
POPTR_012G054300v3	AAI domain-containing protein;POPTR_012G054300;PTN002113443;orthologs	BIFUNCTIONAL INHIBITOR/LIPID-TRANSFER PROTEIN/SEED STORAGE 2S ALBUMIN SUPERFAMILY PROTEIN (PTHR33214:SF30)
POPTR_010G103300v3	Receptor-like serine/threonine-protein kinase;POPTR_010G103300;PTN005396769;orthologs	NON-SPECIFIC SERINE/THREONINE PROTEIN KINASE (PTHR47974:SF6)
POPTR_017G134800v3	C2H2 family protein;POPTR_017G134800;PTN002402986;orthologs	ZINC FINGER PROTEIN 4 (PTHR45730:SF94)
POPTR_009G117500v3	Usp domain-containing protein;POPTR_009G117500;PTN002075048;orthologs	ADENINE NUCLEOTIDE ALPHA HYDROLASES-LIKE SUPERFAMILY PROTEIN (PTHR47583:SF1)
POPTR_001G174300v3	Uncharacterized protein;POPTR_001G174300;PTN005041234;orthologs	OS01G0104300 PROTEIN (PTHR34198:SF1)
POPTR_005G077300v3	ERF family protein;POPTR_005G077300;PTN002058748;orthologs	ETHYLENE-RESPONSIVE TRANSCRIPTION FACTOR RAP2-4 (PTHR31657:SF78)
POPTR_005G246300v3	Uncharacterized protein;POPTR_005G246300;PTN002263515;orthologs	ORNITHINE DECARBOXYLASE 1-RELATED (PTHR11482:SF6)
POPTR_008G132400v3	H15 domain-containing protein;POPTR_008G132400;PTN001689995;orthologs	HMG-Y-RELATED PROTEIN A (PTHR11467:SF103)
POPTR_013G065500v3	F-box domain-containing protein;POPTR_013G065500;PTN002081734;orthologs	F-BOX DOMAIN-CONTAINING PROTEIN (PTHR47993:SF64)
POPTR_006G037100v3	BHLH family protein;POPTR_006G037100;PTN002289080;orthologs	TRANSCRIPTION FACTOR BHLH106-RELATED (PTHR45844:SF19)
POPTR_009G058500v3	Uncharacterized protein;POPTR_009G058500;PTN005033341;orthologs	OS07G0185900 PROTEIN (PTHR33983:SF1)
POPTR_010G240800v3	MYB family protein;POPTR_010G240800;PTN002454528;orthologs	MYB-LIKE PROTEIN I (PTHR44042:SF15)
POPTR_014G003200v3	Uncharacterized protein;POPTR_014G003200;PTN004613855;orthologs	NB-ARC DOMAIN-CONTAINING PROTEIN (PTHR23155:SF1139)
POPTR_014G167400v3	AMPKBI domain-containing protein;POPTR_014G167400;PTN005296465;orthologs	AMPKBI DOMAIN-CONTAINING PROTEIN (PTHR46316:SF6)
POPTR_010G178400v3	Leucine zipper-EF-hand-containing transmembrane protein 1;POPTR_010G178400;PTN007631385;orthologs	MITOCHONDRIAL PROTON/CALCIUM EXCHANGER PROTEIN (PTHR14009:SF1)
POPTR_002G014700v3	CRAL-TRIO domain-containing protein;POPTR_002G014700;PTN002254888;orthologs	OS04G0561200 PROTEIN (PTHR11106:SF118)
POPTR_010G031500v3	Sodium/hydrogen exchanger;POPTR_010G031500;PTN007421101;orthologs	SODIUM/HYDROGEN EXCHANGER 3 (PTHR10110:SF159)
POPTR_017G108100v3	Uncharacterized protein;POPTR_017G108100;PTN002367153;orthologs	PPR CONTAINING PLANT PROTEIN (PTHR47003:SF3)
POPTR_001G246900v3	Tubulin beta chain;POPTR_001G246900;PTN001697342;orthologs	TUBULIN BETA-7 CHAIN (PTHR11588:SF301)
POPTR_015G135100v3	Uncharacterized protein;POPTR_015G135100;PTN008735104;orthologs	SUBFAMILY NOT NAMED (PTHR48248:SF5)
POPTR_011G056900v3	ERF family protein;POPTR_011G056900;PTN002060554;orthologs	AP2/ERF DOMAIN-CONTAINING PROTEIN (PTHR31677:SF202)
POPTR_015G057800v3	X8 domain-containing protein;POPTR_015G057800;PTN002085241;orthologs	PLASMODESMATA CALLOSE-BINDING PROTEIN 3 (PTHR31044:SF25)
POPTR_018G113500v3	Transmembrane 9 superfamily member;POPTR_018G113500;PTN004189963;orthologs	TRANSMEMBRANE 9 SUPERFAMILY MEMBER (PTHR10766:SF55)
POPTR_005G070600v3	Uncharacterized protein;POPTR_005G070600;PTN002134065;orthologs	SUBFAMILY NOT NAMED (PTHR33674:SF10)
POPTR_019G067800v3	Uncharacterized protein;POPTR_019G067800;PTN005186041;orthologs	ACYL-ACTIVATING ENZYME 8-RELATED (PTHR43859:SF57)
POPTR_003G072200v3	Uncharacterized protein;POPTR_003G072200;PTN004761758;orthologs	TRANSLATION INITIATION FACTOR 2B FAMILY PROTEIN, PUTATIVE, EXPRESSED-RELATED (PTHR31087:SF25)
POPTR_012G139800v3	DUF4005 domain-containing protein;POPTR_012G139800;PTN002087835;orthologs	PROTEIN IQ-DOMAIN 23 (PTHR32295:SF174)
POPTR_017G116600v3	Fatty acid hydroxylase domain-containing protein;POPTR_017G116600;PTN002275158;orthologs	FATTY ACID HYDROXYLASE DOMAIN-CONTAINING PROTEIN 2-RELATED (PTHR11863:SF226)
POPTR_003G056600v3	Uncharacterized protein;POPTR_003G056600;PTN007661584;orthologs	CENTROMERE PROTEIN C (PTHR16684:SF11)
POPTR_011G094400v3	(1-3)-beta-glucan endohydrolase;POPTR_011G094400;PTN002426528;orthologs	GLUCAN ENDO-1,3-BETA-D-GLUCOSIDASE (PTHR32227:SF299)
POPTR_006G136700v3	Sucrose synthase;POPTR_006G136700;PTN002288317;orthologs	SUCROSE SYNTHASE 1 (PTHR45839:SF7)
POPTR_001G397200v3	AP2/ERF domain-containing protein;POPTR_001G397200;PTN004861161;orthologs	ETHYLENE-RESPONSIVE TRANSCRIPTION FACTOR 8 (PTHR31677:SF210)
POPTR_012G041800v3	Hydrolase_4 domain-containing protein;POPTR_012G041800;PTN004276653;orthologs	ALPHA/BETA-HYDROLASES SUPERFAMILY PROTEIN (PTHR11614:SF175)
POPTR_005G175400v3	Aminotran_1_2 domain-containing protein;POPTR_005G175400;PTN002465825;orthologs	FI04487P (PTHR43807:SF20)
POPTR_015G087100v3	Hydrolase_4 domain-containing protein;POPTR_015G087100;PTN001745967;orthologs	ALPHA/BETA-HYDROLASES SUPERFAMILY PROTEIN (PTHR12277:SF154)
POPTR_013G047200v3	Protein kinase domain-containing protein;POPTR_013G047200;PTN007547785;orthologs	PROTEIN KINASE DOMAIN-CONTAINING PROTEIN (PTHR11909:SF390)
POPTR_005G086500v3	Protein kinase domain-containing protein;POPTR_005G086500;PTN008290829;orthologs	SYSTEMIN RECEPTOR SR160 (PTHR48056:SF18)
POPTR_003G079500v3	HTH myb-type domain-containing protein;POPTR_003G079500;PTN001940904;orthologs	TRANSCRIPTION FACTOR KUA1 (PTHR44191:SF26)
POPTR_002G238900v3	Uncharacterized protein;POPTR_002G238900;PTN002060315;orthologs	OS01G0913100 PROTEIN (PTHR31676:SF110)
POPTR_004G108000v3	Uncharacterized protein;POPTR_004G108000;PTN005329103;orthologs	PPR CONTAINING PLANT PROTEIN (PTHR47003:SF3)
POPTR_010G089200v3	PABS domain-containing protein;POPTR_010G089200;PTN002457796;orthologs	SPERMINE SYNTHASE (PTHR43317:SF9)
POPTR_012G128700v3	Protein kinase domain-containing protein;POPTR_012G128700;PTN002407242;orthologs	OS08G0117700 PROTEIN (PTHR48010:SF72)
POPTR_008G151300v3	Uncharacterized protein;POPTR_008G151300;PTN004143297;orthologs	VACUOLE MEMBRANE PROTEIN 1 (PTHR10281:SF1)
POPTR_008G049300v3	Uncharacterized protein;POPTR_008G049300;PTN001680114;orthologs	GLUTATHIONE S-TRANSFERASE DHAR2-RELATED (PTHR44420:SF2)
POPTR_008G159200v3	Uncharacterized protein;POPTR_008G159200;;orthologs
POPTR_001G147500v3	Uncharacterized protein;POPTR_001G147500;PTN001696200;orthologs	DYNAMIN-LIKE PROTEIN 1E (PTHR11566:SF224)
POPTR_001G219100v3	Uncharacterized protein;POPTR_001G219100;PTN005197136;orthologs	DUPLICATED HOMEODOMAIN-LIKE SUPERFAMILY PROTEIN (PTHR44191:SF13)
POPTR_008G115900v3	Peptidase A1 domain-containing protein;POPTR_008G115900;PTN002299560;orthologs	PEPTIDASE A1 DOMAIN-CONTAINING PROTEIN (PTHR47967:SF46)
POPTR_013G002400v3	Aminotran_5 domain-containing protein;POPTR_013G002400;PTN005144871;orthologs	HERCYNYLCYSTEINE SULFOXIDE LYASE (PTHR43092:SF2)
POPTR_001G106100v3	Tubulin beta chain;POPTR_001G106100;PTN001697399;orthologs	TUBULIN BETA-2 CHAIN (PTHR11588:SF453)
POPTR_011G032700v3	Uncharacterized protein;POPTR_011G032700;PTN005032060;orthologs	BNAC08G14940D PROTEIN (PTHR33971:SF3)
POPTR_011G145600v3	Uncharacterized protein;POPTR_011G145600;PTN002420304;orthologs	PROTEIN PIN-LIKES 3-LIKE ISOFORM X1 (PTHR31651:SF6)
POPTR_011G031200v3	Kinesin-like protein;POPTR_011G031200;PTN001946978;orthologs	KINESIN-LIKE PROTEIN KIN-14C-RELATED (PTHR24115:SF917)
POPTR_017G115300v3	BHLH domain-containing protein;POPTR_017G115300;PTN002289115;orthologs	BHLH DOMAIN-CONTAINING PROTEIN (PTHR12565:SF354)
POPTR_014G177800v3	Uncharacterized protein;POPTR_014G177800;PTN002420688;orthologs	OS01G0913100 PROTEIN (PTHR31676:SF110)
POPTR_010G173600v3	Inosine-5'-monophosphate dehydrogenase;POPTR_010G173600;PTN001727629;orthologs	INOSINE-5'-MONOPHOSPHATE DEHYDROGENASE (PTHR11911:SF111)
POPTR_004G015700v3	Uncharacterized protein;POPTR_004G015700;PTN002101550;orthologs	OS07G0516300 PROTEIN (PTHR33083:SF93)
POPTR_012G129600v3	Uncharacterized protein;POPTR_012G129600;PTN002320365;orthologs	65-KDA MICROTUBULE-ASSOCIATED PROTEIN 3 (PTHR19321:SF7)
POPTR_012G041900v3	Annexin;POPTR_012G041900;PTN001629781;orthologs	ANNEXIN A7 (PTHR10502:SF102)
POPTR_002G128500v3	Uncharacterized protein;POPTR_002G128500;PTN004965244;orthologs	AR781 (PTHR33095:SF14)
POPTR_010G157700v3	Glutamine amidotransferase type-2 domain-containing protein;POPTR_010G157700;PTN008173503;orthologs	ASPARAGINE SYNTHETASE DOMAIN-CONTAINING PROTEIN 1 (PTHR45937:SF1)
POPTR_014G139900v3	Uncharacterized protein;POPTR_014G139900;PTN004990033;orthologs	OS01G0930500 PROTEIN (PTHR33265:SF6)
POPTR_014G142700v3	Protein kinase domain-containing protein;POPTR_014G142700;PTN001908185;orthologs	MITOGEN ACTIVATED PROTEIN KINASE KINASE KINASE-LIKE PROTEIN (PTHR44329:SF24)
POPTR_015G069700v3	Coatomer subunit alpha;POPTR_015G069700;PTN001836973;orthologs	COATOMER SUBUNIT ALPHA (PTHR19876:SF1)
POPTR_019G004100v3	WAT1-related protein;POPTR_019G004100;PTN004780335;orthologs	WAT1-RELATED PROTEIN (PTHR31218:SF247)
POPTR_005G237600v3	Cytokinin riboside 5'-monophosphate phosphoribohydrolase;POPTR_005G237600;PTN002036259;orthologs	CYTOKININ RIBOSIDE 5'-MONOPHOSPHATE PHOSPHORIBOHYDROLASE (PTHR31223:SF85)
POPTR_009G053500v3	Uncharacterized protein;POPTR_009G053500;PTN004462332;orthologs	FACTOR, PUTATIVE-RELATED (PTHR14493:SF91)
POPTR_010G251800v3	B box-type domain-containing protein;POPTR_010G251800;PTN002063290;orthologs	OS06G0661200 PROTEIN (PTHR31717:SF81)
POPTR_005G218600v3	WD_REPEATS_REGION domain-containing protein;POPTR_005G218600;PTN002315050;orthologs	U3 SMALL NUCLEOLAR RNA-ASSOCIATED PROTEIN 18 HOMOLOG (PTHR18359:SF0)
POPTR_007G003100v3	MFS domain-containing protein;POPTR_007G003100;PTN002783451;orthologs	SYNAPTIC VESICLE 2-RELATED PROTEIN (PTHR24064:SF445)
POPTR_002G068600v3	Uncharacterized protein;POPTR_002G068600;PTN004553142;orthologs	TRIHELIX TRANSCRIPTION FACTOR DF1 (PTHR21654:SF59)
POPTR_005G081200v3	RING-type domain-containing protein;POPTR_005G081200;PTN002305423;orthologs	RING-TYPE DOMAIN-CONTAINING PROTEIN (PTHR47662:SF1)
POPTR_013G065800v3	Uncharacterized protein;POPTR_013G065800;PTN002284287;orthologs	CATION/CALCIUM EXCHANGER 1 (PTHR12266:SF24)
POPTR_005G142200v3	Uncharacterized protein;POPTR_005G142200;PTN002239496;orthologs	EB1, ISOFORM F-RELATED (PTHR10623:SF6)
POPTR_002G193900v3	Smr domain-containing protein;POPTR_002G193900;PTN002367569;orthologs	SMR DOMAIN-CONTAINING PROTEIN (PTHR47936:SF1)
POPTR_005G216300v3	Uncharacterized protein;POPTR_005G216300;PTN004861936;orthologs	OS11G0587300 PROTEIN (PTHR31680:SF12)
POPTR_006G180500v3	Uncharacterized protein;POPTR_006G180500;PTN005008777;orthologs	ATP-DEPENDENT DNA HELICASE (PTHR33494:SF27)
POPTR_007G079800v3	WRKY domain-containing protein;POPTR_007G079800;PTN002415407;orthologs	WRKY TRANSCRIPTION FACTOR 59-RELATED (PTHR31221:SF283)
POPTR_018G127700v3	Uncharacterized protein;POPTR_018G127700;PTN001637791;orthologs	TRANSCRIPTION FACTOR MYB82 (PTHR47998:SF43)
POPTR_008G018600v3	Uncharacterized protein;POPTR_008G018600;PTN002413709;orthologs	CORE-2/I-BRANCHING ENZYME (PTHR31042:SF108)
POPTR_003G179900v3	AP2/ERF domain-containing protein;POPTR_003G179900;PTN002033802;orthologs	AP2/ERF DOMAIN-CONTAINING PROTEIN (PTHR31194:SF69)
POPTR_001G388900v3	Uncharacterized protein;POPTR_001G388900;PTN004263686;orthologs	POLYPHENOL OXIDASE, CHLOROPLASTIC (PTHR11474:SF95)
POPTR_002G113400v3	HD-ZIP family protein;POPTR_002G113400;PTN001964857;orthologs	HOMEOBOX ASSOCIATED LEUCINE ZIPPER PROTEIN (PTHR45714:SF24)
POPTR_001G016200v3	JmjC domain-containing protein;POPTR_001G016200;PTN001753603;orthologs	BIFUNCTIONAL PEPTIDASE AND (3S)-LYSYL HYDROXYLASE JMJD7-RELATED (PTHR12461:SF97)
POPTR_019G127900v3	Uncharacterized protein;POPTR_019G127900;PTN002148749;orthologs	EXPRESSED PROTEIN (PTHR34132:SF4)
POPTR_007G116200v3	Uncharacterized protein;POPTR_007G116200;PTN002330268;orthologs	KINETOCHORE PROTEIN NUF2 (PTHR21650:SF2)
POPTR_011G167700v3	Uncharacterized protein;POPTR_011G167700;PTN004926670;orthologs	PROTEASOME ACTIVATOR COMPLEX SUBUNIT 4 (PTHR32170:SF3)
POPTR_019G079500v3	Uncharacterized protein;POPTR_019G079500;PTN002360135;orthologs	CRAL-TRIO DOMAIN-CONTAINING PROTEIN (PTHR45932:SF17)
POPTR_017G083000v3	Uncharacterized protein;POPTR_017G083000;PTN001904349;orthologs	GIP1-LIKE PROTEIN (PTHR23201:SF122)
POPTR_006G111700v3	Uncharacterized protein;POPTR_006G111700;PTN002434370;orthologs	EXPRESSED PROTEIN (PTHR33512:SF14)
POPTR_009G045400v3	RING-type domain-containing protein;POPTR_009G045400;PTN001808965;orthologs	RING/U-BOX SUPERFAMILY PROTEIN (PTHR15315:SF75)
POPTR_002G188600v3	Protein kinase domain-containing protein;POPTR_002G188600;PTN002405754;orthologs	PROTEIN KINASE DOMAIN-CONTAINING PROTEIN (PTHR47983:SF19)
POPTR_002G218500v3	Uncharacterized protein;POPTR_002G218500;PTN001655178;orthologs	OS09G0482800 PROTEIN (PTHR34574:SF10)
POPTR_006G222200v3	PABS domain-containing protein;POPTR_006G222200;PTN001695189;orthologs	THERMOSPERMINE SYNTHASE ACAULIS5 (PTHR43317:SF1)
POPTR_011G059300v3	Auxin response factor;POPTR_011G059300;PTN002417572;orthologs	AUXIN RESPONSE FACTOR 3 (PTHR31384:SF5)
POPTR_001G277900v3,POPTR_009G072500v3	U6 snRNA-associated Sm-like protein LSm5;LSM5;PTN001841872;orthologs	U6 SNRNA-ASSOCIATED SM-LIKE PROTEIN LSM5 (PTHR20971:SF0)
POPTR_006G019300v3	Uncharacterized protein;POPTR_006G019300;PTN005329271;orthologs	POLLEN-SPECIFIC LEUCINE-RICH REPEAT EXTENSIN-LIKE PROTEIN 1 (PTHR47005:SF5)
POPTR_001G317400v3	Uncharacterized protein;POPTR_001G317400;PTN001769902;orthologs	ALKALINE PHYTOCERAMIDASE FAMILY PROTEIN, EXPRESSED (PTHR46852:SF1)
POPTR_012G122900v3	Uncharacterized protein;POPTR_012G122900;PTN004613686;orthologs	LEUCINE-RICH REPEAT AND WD REPEAT-CONTAINING PROTEIN 1 (PTHR23155:SF1156)
POPTR_010G024900v3	AA_TRNA_LIGASE_II_ALA domain-containing protein;POPTR_010G024900;PTN008109125;orthologs	THREONYL AND ALANYL TRNA SYNTHETASE SECOND ADDITIONAL DOMAIN-CONTAINING PROTEIN (PTHR43462:SF2)
POPTR_008G112800v3	DNA-directed RNA polymerase;POPTR_008G112800;PTN002226462;orthologs	DNA-DIRECTED RNA POLYMERASE, MITOCHONDRIAL (PTHR10102:SF0)
POPTR_004G096000v3	AAI domain-containing protein;POPTR_004G096000;PTN002113403;orthologs	AAI DOMAIN-CONTAINING PROTEIN (PTHR33214:SF73)
POPTR_016G051500v3	Uncharacterized protein;POPTR_016G051500;PTN004808339;orthologs	NUCLEOLAR PROTEIN GAR2-LIKE PROTEIN (PTHR31344:SF11)
POPTR_010G102300v3	Xyloglucan endotransglucosylase/hydrolase;POPTR_010G102300;PTN002027267;orthologs	XYLOGLUCAN ENDOTRANSGLUCOSYLASE/HYDROLASE PROTEIN 27-RELATED (PTHR31062:SF16)
POPTR_016G069400v3	RING-type E3 ubiquitin transferase;POPTR_016G069400;PTN001872347;orthologs	E3 UBIQUITIN-PROTEIN LIGASE PUB23 (PTHR22849:SF132)
POPTR_005G247700v3	Uncharacterized protein;POPTR_005G247700;PTN001710360;orthologs	OS04G0561900 PROTEIN (PTHR11709:SF387)
POPTR_011G047300v3	Uncharacterized protein;POPTR_011G047300;PTN001690492;orthologs	TYROSINASE (PTHR11474:SF76)
POPTR_009G014100v3	Uncharacterized protein;POPTR_009G014100;PTN002101472;orthologs	EMB|CAB72159.1 (PTHR46525:SF2)
POPTR_009G065300v3	Clustered mitochondria protein homolog;POPTR_009G065300;PTN007582795;orthologs	CLUSTERED MITOCHONDRIA PROTEIN HOMOLOG (PTHR12601:SF6)
POPTR_003G137100v3	Uncharacterized protein;POPTR_003G137100;PTN005197545;orthologs	PROTEIN SPA1-RELATED 2 (PTHR44218:SF15)
POPTR_014G028900v3	Uncharacterized protein;POPTR_014G028900;PTN007797855;orthologs	PROTEIN KINASE FAMILY PROTEIN (PTHR24356:SF396)
POPTR_016G089500v3	Uncharacterized protein;POPTR_016G089500;PTN001827601;orthologs	SUBFAMILY NOT NAMED (PTHR45687:SF79)
POPTR_003G089600v3	Smr domain-containing protein;POPTR_003G089600;PTN002368081;orthologs	OS03G0856100 PROTEIN (PTHR47447:SF3)
POPTR_002G242900v3	GTD-binding domain-containing protein;POPTR_002G242900;PTN004824236;orthologs	GTD-BINDING DOMAIN-CONTAINING PROTEIN (PTHR31422:SF44)
POPTR_001G147300v3	Uncharacterized protein;POPTR_001G147300;PTN001822645;orthologs	HALOACID DEHALOGENASE-LIKE HYDROLASE DOMAIN-CONTAINING PROTEIN SGPP (PTHR46193:SF9)
POPTR_011G064700v3	PMR5N domain-containing protein;POPTR_011G064700;PTN004936969;orthologs	PROTEIN TRICHOME BIREFRINGENCE-LIKE 37 (PTHR32285:SF42)
POPTR_009G140500v3	Uncharacterized protein;POPTR_009G140500;PTN004674745;orthologs	SIGNAL RECOGNITION PARTICLE 43 KDA PROTEIN, CHLOROPLASTIC (PTHR24128:SF43)
POPTR_002G022200v3	Uncharacterized protein;POPTR_002G022200;PTN005088395;orthologs	MYOSIN HEAVY CHAIN-RELATED PROTEIN (PTHR34452:SF7)
POPTR_003G196300v3	Amidohydro_3 domain-containing protein;POPTR_003G196300;PTN007705144;orthologs	PROTEIN LONG AFTER FAR-RED 3 (PTHR22642:SF2)
POPTR_012G123900v3	Patatin;POPTR_012G123900;PTN004933331;orthologs	OS03G0784100 PROTEIN (PTHR32241:SF12)
POPTR_012G027800v3	Uncharacterized protein;POPTR_012G027800;;orthologs
POPTR_001G092900v3	WRKY domain-containing protein;POPTR_001G092900;PTN007942951;orthologs	WRKY TRANSCRIPTION FACTOR 41-RELATED (PTHR32096:SF36)
POPTR_001G440900v3	Uncharacterized protein;POPTR_001G440900;PTN004185515;orthologs	LYSINE-SPECIFIC DEMETHYLASE JMJ14-RELATED (PTHR10694:SF105)
POPTR_017G016000v3	J domain-containing protein;POPTR_017G016000;PTN001940531;orthologs	DNAJ HOMOLOG SUBFAMILY B MEMBER 5 (PTHR24078:SF553)
POPTR_008G158300v3	Aldo_ket_red domain-containing protein;POPTR_008G158300;PTN005173919;orthologs	ALDO/KETO REDUCTASE FAMILY OXIDOREDUCTASE (PTHR43625:SF65)
POPTR_014G029100v3	Uncharacterized protein;POPTR_014G029100;PTN002386642;orthologs	ABSCISIC ACID 8'-HYDROXYLASE 4 (PTHR24286:SF376)
POPTR_006G074900v3	Uncharacterized protein;POPTR_006G074900;PTN004902570;orthologs	TRANSCRIPTION FACTOR BHLH35 (PTHR31945:SF26)
POPTR_001G209300v3	Phytocyanin domain-containing protein;POPTR_001G209300;PTN002093350;orthologs	PUTATIVE, EXPRESSED-RELATED (PTHR33021:SF9)
POPTR_002G183900v3	Uncharacterized protein;POPTR_002G183900;;orthologs
POPTR_001G084000v3	Uncharacterized protein;POPTR_001G084000;PTN001720864;orthologs	GAMMA-CYSTATHIONASE (PTHR11808:SF80)
POPTR_001G310400v3	Uncharacterized protein;POPTR_001G310400;PTN005094917;orthologs	CLASSICAL ARABINOGALACTAN PROTEIN 1 (PTHR36321:SF2)
POPTR_001G166900v3	Uncharacterized protein;POPTR_001G166900;PTN002104272;orthologs	DUF1677 FAMILY PROTEIN (DUF1677) (PTHR33108:SF32)
POPTR_006G008300v3	AAI domain-containing protein;POPTR_006G008300;PTN004871812;orthologs	BIFUNCTIONAL INHIBITOR/LIPID-TRANSFER PROTEIN/SEED STORAGE 2S ALBUMIN SUPERFAMILY PROTEIN (PTHR31731:SF16)
POPTR_001G162800v3	Aminotran_1_2 domain-containing protein;POPTR_001G162800;PTN001715247;orthologs	AT04676P (PTHR11751:SF29)
POPTR_017G088600v3	Phytocyanin domain-containing protein;POPTR_017G088600;PTN002093236;orthologs	LAMIN-LIKE PROTEIN (PTHR33021:SF231)
POPTR_009G039700v3	RING-CH-type domain-containing protein;POPTR_009G039700;PTN001886213;orthologs	RING-CH-TYPE DOMAIN-CONTAINING PROTEIN (PTHR46214:SF18)
POPTR_015G013400v3	Uncharacterized protein;POPTR_015G013400;PTN002271295;orthologs	DIPEPTIDYL-PEPTIDASE 9 (PTHR11731:SF193)
POPTR_005G240300v3	Uncharacterized protein;POPTR_005G240300;PTN002421526;orthologs	PROTEIN PSK SIMULATOR 2 (PTHR31730:SF18)
POPTR_014G107000v3	Protein kinase domain-containing protein;POPTR_014G107000;PTN001967094;orthologs	NON-SPECIFIC SERINE/THREONINE PROTEIN KINASE (PTHR24348:SF22)
POPTR_002G114400v3	Uncharacterized protein;POPTR_002G114400;PTN004545901;orthologs	ZGC:112496 (PTHR21521:SF0)
POPTR_009G144100v3	Uncharacterized protein;POPTR_009G144100;PTN001636652;orthologs	ZINC FINGER A20 AND AN1 DOMAIN-CONTAINING STRESS-ASSOCIATED PROTEIN 3 (PTHR10634:SF98)
POPTR_003G053100v3	Ribosomal protein L37;POPTR_003G053100;PTN001645170;orthologs	RIBOSOMAL PROTEIN L37 (PTHR10768:SF39)
POPTR_003G173400v3	Uncharacterized protein;POPTR_003G173400;PTN002089336;orthologs	IMPORT RECEPTOR SUBUNIT TOM20, PUTATIVE-RELATED (PTHR32409:SF13)
POPTR_001G352400v3	WRKY domain-containing protein;POPTR_001G352400;PTN002415403;orthologs	WRKY TRANSCRIPTION FACTOR 20 (PTHR31221:SF320)
POPTR_017G096000v3	Protein kinase domain-containing protein;POPTR_017G096000;PTN004717261;orthologs	PROTEIN KINASE DOMAIN-CONTAINING PROTEIN (PTHR27003:SF444)
POPTR_006G076900v3	HMA domain-containing protein;POPTR_006G076900;PTN005158951;orthologs	CADMIUM/ZINC-TRANSPORTING ATPASE HMA4-RELATED (PTHR48085:SF5)
POPTR_008G213500v3	Two-component response regulator;POPTR_008G213500;PTN008122941;orthologs	TWO-COMPONENT RESPONSE REGULATOR ARR2 (PTHR43874:SF67)
POPTR_002G103900v3	J domain-containing protein;POPTR_002G103900;PTN002557315;orthologs	CHAPERONE DNAJ-DOMAIN SUPERFAMILY PROTEIN (PTHR45504:SF3)
POPTR_003G042700v3	Uncharacterized protein;POPTR_003G042700;PTN002087923;orthologs	PROTEIN IQ-DOMAIN 8 (PTHR32295:SF126)
POPTR_012G095000v3	Uncharacterized protein;POPTR_012G095000;PTN004669937;orthologs	4-COUMARATE--COA LIGASE-LIKE 9 (PTHR24096:SF251)
POPTR_005G145500v3	LOB domain-containing protein;POPTR_005G145500;PTN002041546;orthologs	LOB DOMAIN-CONTAINING PROTEIN 39 (PTHR31304:SF1)
POPTR_013G053200v3	t-SNARE coiled-coil homology domain-containing protein;POPTR_013G053200;PTN001837600;orthologs	SYNTAXIN-RELATED PROTEIN KNOLLE (PTHR19957:SF251)
POPTR_017G144800v3	HTH myb-type domain-containing protein;POPTR_017G144800;PTN004386073;orthologs	HTH MYB-TYPE DOMAIN-CONTAINING PROTEIN (PTHR12802:SF161)
POPTR_014G025300v3	WOX family protein;POPTR_014G025300;PTN001964203;orthologs	WUSCHEL-RELATED HOMEOBOX 4 (PTHR47716:SF1)
POPTR_002G010000v3	B-like cyclin;POPTR_002G010000;PTN002229059;orthologs	CYCLIN-B2-4 (PTHR10177:SF402)
POPTR_005G024800v3	TCTP domain-containing protein;POPTR_005G024800;PTN001736787;orthologs	TRANSLATIONALLY CONTROLLED TUMOR PROTEIN 2 (PTHR11991:SF17)
POPTR_017G063300v3	NAC domain-containing protein;POPTR_017G063300;PTN002076784;orthologs	NAC4 PROTEIN (PTHR31989:SF20)
POPTR_002G012900v3	Aa_trans domain-containing protein;POPTR_002G012900;PTN004584951;orthologs	OS04G0562100 PROTEIN (PTHR48017:SF47)
POPTR_005G099300v3	Uncharacterized protein;POPTR_005G099300;PTN004855217;orthologs	PROTEIN PIN-LIKES 7 (PTHR31651:SF3)
POPTR_006G219600v3	Chalcone_isomerase domain-containing protein;POPTR_006G219600;PTN002407511;orthologs	FATTY-ACID-BINDING PROTEIN 2 (PTHR47284:SF3)
POPTR_006G223900v3	SHSP domain-containing protein;POPTR_006G223900;PTN001692721;orthologs	18.0 KDA CLASS II HEAT SHOCK PROTEIN (PTHR11527:SF260)
POPTR_001G272800v3	Tubulin beta chain;POPTR_001G272800;PTN001697409;orthologs	TUBULIN BETA CHAIN (PTHR11588:SF435)
POPTR_018G102800v3	Uncharacterized protein;POPTR_018G102800;PTN002434279;orthologs	ATP-DEPENDENT DNA HELICASE (PTHR33494:SF27)
POPTR_011G083100v3	Uncharacterized protein;POPTR_011G083100;PTN004758021;orthologs	OS07G0152000 PROTEIN (PTHR31072:SF93)
POPTR_006G230500v3	Uncharacterized protein;POPTR_006G230500;PTN005197025;orthologs	MYB-LIKE TRANSCRIPTION FACTOR FAMILY PROTEIN (PTHR44191:SF53)
POPTR_003G104500v3	Myb-like domain-containing protein;POPTR_003G104500;PTN004552806;orthologs	SI:DKEY-66I24.7 (PTHR21654:SF84)
POPTR_009G020400v3	Protein kinase domain-containing protein;POPTR_009G020400;PTN005391064;orthologs	PROTEIN KINASE (PTHR47986:SF3)
POPTR_003G003500v3	Uncharacterized protein;POPTR_0022s00300g;PTN002436899;orthologs	PLASMINOGEN ACTIVATOR INHIBITOR (PTHR34116:SF2)
POPTR_019G031600v3	NAC family protein;POPTR_019G031600;PTN002421716;orthologs	NAC DOMAIN-CONTAINING PROTEIN 87 (PTHR31744:SF92)
POPTR_002G126300v3	Alpha-amylase;POPTR_002G126300;PTN005164169;orthologs	ALPHA-AMYLASE 1 (PTHR43447:SF37)
POPTR_005G109200v3	Uncharacterized protein;POPTR_005G109200;PTN001827632;orthologs	AQUAPORIN PIP2-7-RELATED (PTHR45687:SF19)
POPTR_001G307200v3	PKS_ER domain-containing protein;POPTR_001G307200;PTN001708103;orthologs	DEATH RESISTOR ADH DOMAIN CONTAINING TARGET, ISOFORM C (PTHR42683:SF85)
POPTR_006G099600v3	RING-type domain-containing protein;POPTR_006G099600;PTN002310087;orthologs	E3 UBIQUITIN-PROTEIN LIGASE AIRP2 (PTHR15315:SF31)
POPTR_003G182200v3	WRKY domain-containing protein;POPTR_003G182200;PTN002418035;orthologs	WRKY TRANSCRIPTION FACTOR 40-RELATED (PTHR31429:SF3)
POPTR_009G142000v3	Chitin-binding type-1 domain-containing protein;POPTR_009G142000;PTN004559799;orthologs	BASIC ENDOCHITINASE B (PTHR22595:SF143)
POPTR_015G140800v3	Uncharacterized protein;POPTR_015G140800;PTN002134221;orthologs	OS02G0674233 PROTEIN (PTHR33676:SF15)
POPTR_006G014500v3	Cystatin domain-containing protein;POPTR_006G014500;PTN001686460;orthologs	CYSTEINE PROTEINASE INHIBITOR 5 (PTHR47364:SF2)
POPTR_001G134000v3	Phosphoribulokinase;POPTR_001G134000;PTN001616706;orthologs	PHOSPHORIBULOKINASE (PTHR10285:SF211)
POPTR_018G048100v3	Uncharacterized protein;POPTR_018G048100;PTN002431432;orthologs	MYOSIN LIGHT CHAIN KINASE DDB_G0279831 ISOFORM X1-RELATED (PTHR33172:SF37)
POPTR_006G068500v3	F-box domain-containing protein;POPTR_006G068500;PTN004416060;orthologs	F-BOX DOMAIN-CONTAINING PROTEIN (PTHR13318:SF178)
POPTR_001G198900v3	Uncharacterized protein;POPTR_001G198900;PTN004965995;orthologs	POLLEN-SPECIFIC LEUCINE-RICH REPEAT EXTENSIN-LIKE PROTEIN 2 (PTHR33098:SF36)
POPTR_003G160600v3	S-acyltransferase;POPTR_003G160600;PTN001874534;orthologs	S-ACYLTRANSFERASE (PTHR22883:SF324)
POPTR_008G062000v3	PRONE domain-containing protein;POPTR_008G062000;PTN002240274;orthologs	ROP GUANINE NUCLEOTIDE EXCHANGE FACTOR 5 (PTHR33101:SF1)
POPTR_009G141800v3	Acidic endochitinase WIN6.2C (Fragment);unassigned;;orthologs
POPTR_002G144700v3	GRAS domain-containing protein;POPTR_002G144700;PTN004848249;orthologs	SCARECROW-LIKE PROTEIN 6 (PTHR31636:SF136)
POPTR_001G266000v3	Nuclear transcription factor Y subunit;POPTR_001G266000;PTN002290188;orthologs	NUCLEAR TRANSCRIPTION FACTOR Y SUBUNIT (PTHR12632:SF88)
POPTR_013G073900v3	Uncharacterized protein;POPTR_013G073900;PTN001654812;orthologs	P-LOOP CONTAINING NUCLEOSIDE TRIPHOSPHATE HYDROLASES SUPERFAMILY PROTEIN (PTHR43788:SF3)
POPTR_012G105300v3	Acyl carrier protein;POPTR_012G105300;PTN005283491;orthologs	ACYL CARRIER PROTEIN (PTHR46153:SF11)
POPTR_013G148700v3	SPARK domain-containing protein;POPTR_013G148700;PTN005036003;orthologs	OS07G0557700 PROTEIN (PTHR34056:SF3)
POPTR_005G205700v3	Uncharacterized protein;POPTR_005G205700;PTN004993780;orthologs	ASPARTYL/GLUTAMYL-TRNA(ASN/GLN) AMIDOTRANSFERASE SUBUNIT (PTHR33318:SF7)
POPTR_017G095500v3	Uncharacterized protein;POPTR_017G095500;PTN005034137;orthologs	PROTEIN, PUTATIVE-RELATED (PTHR34023:SF4)
POPTR_006G101100v3	Fe2OG dioxygenase domain-containing protein;POPTR_006G101100;PTN001612170;orthologs	JASMONATE-INDUCED OXYGENASE 4 (PTHR47990:SF176)
POPTR_016G033100v3	Uncharacterized protein;POPTR_016G033100;PTN007844952;orthologs	STOMATAL CLOSURE-RELATED ACTIN-BINDING PROTEIN 3 (PTHR31172:SF7)
POPTR_017G017300v3	Glutaredoxin 8;GRX8;PTN001606313;orthologs	GLUTAREDOXIN-C9 (PTHR10168:SF219)
POPTR_010G024600v3	Uncharacterized protein;POPTR_010G024600;PTN002438891;orthologs	UVEAL AUTOANTIGEN WITH COILED-COIL/ANKYRIN (PTHR34681:SF2)
POPTR_006G107700v3	Transcription repressor;POPTR_006G107700;PTN004956212;orthologs	TRANSCRIPTION REPRESSOR OFP4 (PTHR33057:SF151)
POPTR_002G228600v3	PDZ domain-containing protein;POPTR_002G228600;PTN001879823;orthologs	MEMBRANE METALLOPROTEASE ARASP2, CHLOROPLASTIC-RELATED (PTHR42837:SF2)
POPTR_008G054400v3	Uncharacterized protein;POPTR_008G054400;PTN008022709;orthologs	EXPRESSED PROTEIN (PTHR34054:SF2)
POPTR_010G119700v3	Uncharacterized protein;POPTR_010G119700;PTN001662974;orthologs	LIPASE (PTHR11005:SF100)
POPTR_011G140300v3	Uncharacterized protein;POPTR_011G140300;;orthologs
POPTR_013G083300v3	Uncharacterized protein;POPTR_013G083300;PTN001671480;orthologs	XANTHINE/URACIL PERMEASE C887.17-RELATED (PTHR43337:SF1)
POPTR_001G415300v3	Protein kinase domain-containing protein;POPTR_001G415300;PTN005391731;orthologs	CALCIUM/CALMODULIN-REGULATED RECEPTOR-LIKE KINASE 1 (PTHR27001:SF909)
POPTR_005G001500v3	Pectin acetylesterase;POPTR_005G001500;PTN002329628;orthologs	PECTIN ACETYLESTERASE 12 (PTHR21562:SF5)
POPTR_015G044600v3	Kinesin-like protein;POPTR_015G044600;PTN004672408;orthologs	KINESIN FAMILY MEMBER 11 (PTHR47970:SF12)
POPTR_005G257500v3	Protein kinase domain-containing protein;POPTR_005G257500;PTN004655607;orthologs	CYCLIN-DEPENDENT KINASE B2-2 (PTHR24056:SF178)
POPTR_015G004700v3	Uncharacterized protein;POPTR_015G004700;PTN005236051;orthologs	60S ACIDIC RIBOSOMAL PROTEIN P1 (PTHR45696:SF10)
POPTR_008G176000v3	F-box domain-containing protein;POPTR_008G176000;PTN001974033;orthologs	OS02G0504900 PROTEIN (PTHR46344:SF1)
POPTR_005G039100v3	Uncharacterized protein;POPTR_005G039100;PTN002448952;orthologs	BRANCHED-CHAIN-AMINO-ACID AMINOTRANSFERASE-LIKE PROTEIN 1 (PTHR42743:SF20)
POPTR_001G450000v3	Uncharacterized protein;POPTR_001G450000;PTN002132621;orthologs	AVR9/CF-9 RAPIDLY ELICITED PROTEIN (PTHR33641:SF15)
POPTR_017G032800v3	Uncharacterized protein;POPTR_017G032800;PTN004891868;orthologs	EXPRESSED PROTEIN (PTHR31865:SF0)
POPTR_014G036500v3	Aa_trans domain-containing protein;POPTR_014G036500;PTN001880805;orthologs	LYSINE HISTIDINE TRANSPORTER-LIKE 8 (PTHR48017:SF163)
POPTR_008G057100v3	Expansin;POPTR_008G057100;PTN002070074;orthologs	EXPANSIN-A4 (PTHR31867:SF166)
POPTR_004G007500v3	WRKY domain-containing protein;POPTR_004G007500;PTN002418032;orthologs	WRKY TRANSCRIPTION FACTOR 31-RELATED (PTHR31429:SF82)
POPTR_005G065200v3	Uncharacterized protein;POPTR_005G065200;PTN004125314;orthologs	METHYLTRANSFERASE PMT26-RELATED (PTHR10108:SF1130)
POPTR_011G149400v3	Uncharacterized protein;POPTR_011G149400;PTN008734592;orthologs	OS04G0581700 PROTEIN (PTHR48175:SF3)
POPTR_009G130600v3	Uncharacterized protein;POPTR_009G130600;PTN001756462;orthologs	ZINC FINGER CCCH DOMAIN-CONTAINING PROTEIN 39 (PTHR12547:SF121)
POPTR_017G054000v3	CDI domain-containing protein;POPTR_017G054000;PTN001615802;orthologs	CYCLIN-DEPENDENT KINASE INHIBITOR 4 (PTHR46776:SF30)
POPTR_014G187000v3	ENDO3c domain-containing protein;POPTR_014G187000;PTN004468128;orthologs	METHYL-CPG-BINDING DOMAIN PROTEIN 4-LIKE PROTEIN (PTHR15074:SF0)
POPTR_003G073300v3	RING-type E3 ubiquitin transferase;POPTR_003G073300;PTN005309835;orthologs	RING-H2 FINGER PROTEIN ATL43 (PTHR46539:SF2)
POPTR_008G221000v3	Uncharacterized protein;POPTR_008G221000;PTN002117660;orthologs	EXPRESSED PROTEIN (PTHR33306:SF1)
POPTR_006G107100v3	Aspartate aminotransferase;POPTR_006G107100;PTN007545770;orthologs	ASPARTATE AMINOTRANSFERASE (PTHR11879:SF14)
POPTR_005G237900v3	HVA22-like protein;POPTR_005G237900;PTN002284871;orthologs	LP05237P-RELATED (PTHR12300:SF117)
POPTR_005G168600v3	WD_REPEATS_REGION domain-containing protein;POPTR_005G168600;PTN005193146;orthologs	WD REPEAT PROTEIN (AFU_ORTHOLOGUE AFUA_8G05640) (PTHR43991:SF12)
POPTR_015G117300v3	Uncharacterized protein;POPTR_015G117300;PTN008054796;orthologs	E3 UBIQUITIN-PROTEIN LIGASE LIN-RELATED (PTHR35549:SF3)
POPTR_007G110600v3	RING-type E3 ubiquitin transferase;POPTR_007G110600;PTN004574336;orthologs	U-BOX DOMAIN-CONTAINING PROTEIN 27-RELATED (PTHR22849:SF20)
POPTR_010G042500v3	Uncharacterized protein;POPTR_010G042500;PTN005290712;orthologs	CRS2-ASSOCIATED FACTOR 2, CHLOROPLASTIC (PTHR46247:SF3)
POPTR_002G035000v3	SANT domain-containing protein;POPTR_002G035000;PTN005192279;orthologs	PROTEIN RADIALIS-LIKE 5 (PTHR43952:SF95)
POPTR_006G126800v3	Phenylalanine ammonia-lyase;POPTR_006G126800;PTN001621752;orthologs	PHENYLALANINE AMMONIA-LYASE (PTHR10362:SF70)
POPTR_005G146900v3	Glyco_trans_2-like domain-containing protein;POPTR_005G146900;PTN002078482;orthologs	XYLOGLUCAN GLYCOSYLTRANSFERASE 12-RELATED (PTHR32044:SF44)
POPTR_007G090500v3	Uncharacterized protein;POPTR_007G090500;PTN002436153;orthologs	DNA-DIRECTED RNA POLYMERASE SUBUNIT BETA (PTHR33924:SF1)
POPTR_005G170700v3	Uncharacterized protein;POPTR_005G170700;PTN002052021;orthologs	BPS1-LIKE PROTEIN (PTHR31509:SF42)
POPTR_006G255900v3	Adenine phosphoribosyltransferase;POPTR_006G255900;PTN001717598;orthologs	ADENINE PHOSPHORIBOSYLTRANSFERASE 5 (PTHR11776:SF22)
POPTR_004G007700v3	Protein kinase domain-containing protein;POPTR_004G007700;PTN004698210;orthologs	PROTEIN KINASE DOMAIN-CONTAINING PROTEIN (PTHR48011:SF6)
POPTR_014G148900v3	BHLH domain-containing protein;POPTR_014G148900;PTN007581739;orthologs	TRANSCRIPTION FACTOR BHLH63 (PTHR12565:SF444)
POPTR_017G009900v3	Formin-like protein;POPTR_017G009900;PTN004618173;orthologs	FORMIN-LIKE PROTEIN 2 (PTHR23213:SF368)
POPTR_001G116500v3	Fatty acid hydroxylase domain-containing protein;POPTR_001G116500;PTN002275177;orthologs	FATTY ACID HYDROXYLASE DOMAIN-CONTAINING PROTEIN 2-RELATED (PTHR11863:SF226)
POPTR_011G044800v3	Uncharacterized protein;POPTR_011G044800;PTN002443223;orthologs	PROTEIN, PUTATIVE-RELATED (PTHR36615:SF7)
POPTR_001G007300v3	Uncharacterized protein;POPTR_001G007300;PTN001718463;orthologs	CATIONIC AMINO ACID TRANSPORTER (PTHR45826:SF8)
POPTR_001G081400v3	LOB domain-containing protein;POPTR_001G081400;PTN002041407;orthologs	LOB DOMAIN-CONTAINING PROTEIN (PTHR31301:SF194)
POPTR_016G128300v3	Uncharacterized protein;POPTR_016G128300;PTN002415356;orthologs	WRKY TRANSCRIPTION FACTOR 33-RELATED (PTHR31221:SF342)
POPTR_002G105100v3	MHD domain-containing protein;POPTR_002G105100;PTN002237669;orthologs	AP-4 COMPLEX SUBUNIT MU-1 (PTHR10529:SF270)
POPTR_019G112300v3	Uncharacterized protein;POPTR_019G112300;PTN002197324;orthologs	SERINE/THREONINE-KINASE (PTHR36772:SF1)
POPTR_005G195600v3	Peroxidase;PRX36;PTN002037491;orthologs	PEROXIDASE (PTHR31235:SF12)
POPTR_014G069100v3	Uncharacterized protein;POPTR_014G069100;PTN004403929;orthologs	MYELOID LEUKEMIA FACTOR (PTHR13105:SF16)
POPTR_013G147500v3	Uncharacterized protein;POPTR_013G147500;PTN002192520;orthologs	OS06G0683900 PROTEIN (PTHR36386:SF1)
POPTR_009G072900v3	Asparagine synthetase [glutamine-hydrolyzing];POPTR_009G072900;PTN002272693;orthologs	ASPARAGINE SYNTHETASE [GLUTAMINE-HYDROLYZING] 1 (PTHR11772:SF48)
POPTR_019G065000v3	Peptidase A1 domain-containing protein;POPTR_019G065000;PTN001785939;orthologs	ASPARTIC PROTEINASE GIP1-RELATED (PTHR47965:SF6)
POPTR_001G149100v3	Protein kinase domain-containing protein;POPTR_001G149100;PTN001990029;orthologs	SERINE/THREONINE-PROTEIN KINASE PBL19-RELATED (PTHR45621:SF193)
POPTR_010G125100v3	Uncharacterized protein;POPTR_010G125100;PTN002070566;orthologs	ZINC FINGER PROTEIN CONSTANS-LIKE 6-RELATED (PTHR31874:SF1)
POPTR_005G039800v3	BHLH family protein;POPTR_005G039800;PTN002279233;orthologs	MAX-BINDING PROTEIN MNT (PTHR11969:SF54)
POPTR_003G194700v3	VQ domain-containing protein;POPTR_003G194700;PTN002132166;orthologs	OS07G0687400 PROTEIN (PTHR33624:SF14)
POPTR_010G230600v3	Histone H2B;POPTR_010G230600;PTN001918897;orthologs	HISTONE H2B.5-RELATED (PTHR23428:SF297)
POPTR_007G075400v3	Uncharacterized protein;POPTR_007G075400;PTN004345804;orthologs	TRANSMEMBRANE PROTEIN 53 (PTHR12265:SF30)
POPTR_001G088400v3	RING-type domain-containing protein;POPTR_001G088400;PTN007707550;orthologs	E3 UBIQUITIN-PROTEIN LIGASE RHA4A-RELATED (PTHR22765:SF409)
POPTR_003G134500v3	Epimerase domain-containing protein;POPTR_003G134500;PTN002091122;orthologs	3-OXO-DELTA(4,5)-STEROID 5-BETA-REDUCTASE (PTHR32487:SF19)
POPTR_015G076500v3	Uncharacterized protein;POPTR_015G076500;PTN004935190;orthologs	INACTIVE POLY [ADP-RIBOSE] POLYMERASE SRO4-RELATED (PTHR32263:SF12)
POPTR_T012500v3	BURP domain-containing protein;POPTR_T012500;PTN002037815;orthologs	BURP DOMAIN PROTEIN RD22 (PTHR31236:SF2)
POPTR_010G078400v3	Auxin-responsive protein;POPTR_010G078400;PTN007913282;orthologs	AUXIN-RESPONSIVE PROTEIN IAA4 (PTHR31734:SF227)
POPTR_010G145900v3	Phytochrome;POPTR_010G145900;PTN008118189;orthologs	PHYTOCHROME B-RELATED (PTHR43719:SF12)
POPTR_010G073500v3	Uncharacterized protein;POPTR_010G073500;PTN002050547;orthologs	HR-LIKE LESION-INDUCING PROTEIN (PTHR31474:SF4)
POPTR_010G060300v3	Thioredoxin domain-containing protein;POPTR_010G060300;PTN002302977;orthologs	THIOREDOXIN DOMAIN-CONTAINING PROTEIN (PTHR13871:SF96)
POPTR_002G155300v3	C2 domain-containing protein;POPTR_002G155300;PTN002086151;orthologs	BON1-ASSOCIATED PROTEIN 2 (PTHR32246:SF17)
POPTR_011G066700v3	F-box_5 domain-containing protein;POPTR_011G066700;PTN002554865;orthologs	AT02038P (PTHR16134:SF119)
POPTR_015G099800v3	Uncharacterized protein;POPTR_015G099800;PTN005086400;orthologs	TRANSMEMBRANE PROTEIN (PTHR35762:SF2)
POPTR_001G403000v3	DUF3700 domain-containing protein;POPTR_001G403000;PTN005263493;orthologs	OS04G0679400 PROTEIN (PTHR45952:SF2)
POPTR_014G123800v3	DUF1624 domain-containing protein;POPTR_014G123800;PTN002413869;orthologs	OS05G0155700 PROTEIN (PTHR31061:SF23)
POPTR_001G073100v3	CTP synthase;POPTR_001G073100;PTN007513551;orthologs	CTP SYNTHASE (PTHR11550:SF34)
POPTR_002G168200v3	Uncharacterized protein;POPTR_002G168200;PTN004896526;orthologs	JASMONOYL--L-AMINO ACID SYNTHETASE JAR1 (PTHR31901:SF5)
POPTR_015G103900v3	ZnMc domain-containing protein;POPTR_015G103900;PTN002230226;orthologs	METALLOENDOPROTEINASE 5-MMP (PTHR10201:SF272)
POPTR_018G130300v3	TPR_REGION domain-containing protein;POPTR_018G130300;PTN002402654;orthologs	F18B13.21 PROTEIN (PTHR26312:SF168)
POPTR_001G342600v3	Uncharacterized protein;POPTR_001G342600;PTN001869408;orthologs	BNAC09G43060D PROTEIN (PTHR22835:SF219)
POPTR_012G121900v3	Uncharacterized protein;POPTR_012G121900;PTN004613688;orthologs	LEUCINE-RICH REPEAT AND WD REPEAT-CONTAINING PROTEIN 1 (PTHR23155:SF1156)
POPTR_009G119000v3	DUF4408 domain-containing protein;POPTR_009G119000;PTN002132548;orthologs	TRANSMEMBRANE PROTEIN (PTHR33640:SF8)
POPTR_012G046300v3	Uncharacterized protein;POPTR_012G046300;PTN001670868;orthologs	ERAD-ASSOCIATED E3 UBIQUITIN-PROTEIN LIGASE COMPONENT HRD3A-RELATED (PTHR45084:SF1)
POPTR_002G065100v3	Protein kinase domain-containing protein;POPTR_002G065100;PTN004655799;orthologs	PROTEIN KINASE DOMAIN-CONTAINING PROTEIN (PTHR24056:SF425)
POPTR_005G239900v3	Tubulin beta chain;POPTR_005G239900;PTN001697293;orthologs	TUBULIN BETA-1 CHAIN-RELATED (PTHR11588:SF116)
POPTR_019G125000v3	Xyloglucan endotransglucosylase/hydrolase;POPTR_019G125000;PTN002027115;orthologs	XYLOGLUCAN ENDOTRANSGLUCOSYLASE/HYDROLASE PROTEIN 9 (PTHR31062:SF108)
POPTR_003G058600v3	Uncharacterized protein;POPTR_003G058600;PTN002433834;orthologs	TRICHOHYALIN (PTHR33427:SF2)
POPTR_014G099000v3	1-phosphatidylinositol 4-kinase;POPTR_014G099000;PTN005250636;orthologs	PHOSPHATIDYLINOSITOL 4-KINASE GAMMA 4 (PTHR45800:SF24)
POPTR_008G145500v3	ClpS domain-containing protein;POPTR_008G145500;PTN002125921;orthologs	ATP-DEPENDENT CLP PROTEASE ADAPTER PROTEIN CLPS2, CHLOROPLASTIC (PTHR33473:SF13)
POPTR_004G061300v3	Uncharacterized protein;POPTR_004G061300;PTN002201772;orthologs	PRECURSOR OF CEP14 (PTHR37180:SF2)
POPTR_010G221700v3	Patatin;POPTR_010G221700;PTN002085867;orthologs	PATATIN-LIKE PROTEIN 6 (PTHR32241:SF3)
POPTR_009G075700v3	E1 ubiquitin-activating enzyme;POPTR_009G075700;PTN004210922;orthologs	E1 UBIQUITIN-ACTIVATING ENZYME (PTHR10953:SF227)
POPTR_006G273900v3	Uncharacterized protein;POPTR_006G273900;PTN004613540;orthologs	NB-ARC DOMAIN CONTAINING PROTEIN, EXPRESSED (PTHR23155:SF1211)
POPTR_003G219000v3	Rieske domain-containing protein;POPTR_003G219000;PTN004537236;orthologs	RIESKE DOMAIN-CONTAINING PROTEIN (PTHR21266:SF53)
POPTR_001G016700v3	Histone H3.2;POPTR_001G016700;PTN001686721;orthologs	HISTONE H3-LIKE 2-RELATED (PTHR11426:SF217)
POPTR_004G227000v3	Uncharacterized protein;POPTR_004G227000;PTN002148053;orthologs	PLASMINOGEN ACTIVATOR INHIBITOR (PTHR34116:SF2)
POPTR_001G335300v3	Aa_trans domain-containing protein;POPTR_001G335300;PTN001881146;orthologs	LYSINE HISTIDINE TRANSPORTER 1 (PTHR48017:SF79)
POPTR_010G210900v3	Uncharacterized protein;POPTR_010G210900;PTN002228475;orthologs	PROTEIN-TYROSINE-PHOSPHATASE MKP1 (PTHR46381:SF4)
POPTR_006G222800v3	Uncharacterized protein;POPTR_006G222800;PTN001840412;orthologs	PHYTANOYL-COA DIOXYGENASE DOMAIN-CONTAINING PROTEIN 1 (PTHR20883:SF15)
POPTR_016G087000v3	Uncharacterized protein;POPTR_016G087000;;orthologs
POPTR_015G118000v3	RING-type domain-containing protein;POPTR_015G118000;PTN002447950;orthologs	BOI-RELATED E3 UBIQUITIN-PROTEIN LIGASE 1 (PTHR42647:SF55)
POPTR_014G023000v3	B-like cyclin;POPTR_014G023000;PTN002229154;orthologs	CYCLIN-D3-2 (PTHR10177:SF427)
POPTR_017G082200v3	Uncharacterized protein;POPTR_017G082200;PTN001644725;orthologs	60S RIBOSOMAL PROTEIN L34-1-RELATED (PTHR10759:SF5)
POPTR_006G008200v3	X8 domain-containing protein;POPTR_006G008200;PTN007950367;orthologs	X8 DOMAIN-CONTAINING PROTEIN (PTHR31044:SF118)
POPTR_015G069400v3	RING-type domain-containing protein;POPTR_015G069400;PTN002448035;orthologs	CCR4-NOT TRANSCRIPTION COMPLEX SUBUNIT 4 (PTHR12603:SF0)
POPTR_005G026500v3	Histone H2A;POPTR_005G026500;PTN001919506;orthologs	HISTONE H2A (PTHR23430:SF238)
POPTR_007G027900v3	MFS domain-containing protein;POPTR_007G027900;PTN002362227;orthologs	POLYOL TRANSPORTER 3-RELATED (PTHR23500:SF453)
POPTR_014G090500v3	3-methyl-2-oxobutanoate hydroxymethyltransferase;POPTR_014G090500;PTN001840315;orthologs	3-METHYL-2-OXOBUTANOATE HYDROXYMETHYLTRANSFERASE (PTHR20881:SF0)
POPTR_012G077400v3	Uncharacterized protein;POPTR_012G077400;PTN007487950;orthologs	NUCLEOBASE-ASCORBATE TRANSPORTER 6 (PTHR11119:SF112)
POPTR_015G105000v3	Uncharacterized protein;POPTR_015G105000;PTN008226211;orthologs	DUAL SPECIFICITY PROTEIN PHOSPHATASE PHS1 (PTHR47100:SF5)
POPTR_002G021500v3	Peptidyl-prolyl cis-trans isomerase;POPTR_002G021500;PTN001668276;orthologs	PEPTIDYL-PROLYL CIS-TRANS ISOMERASE D-RELATED (PTHR11071:SF561)
POPTR_011G044700v3	Uncharacterized protein;POPTR_011G044700;PTN005101050;orthologs	PROTEIN, PUTATIVE-RELATED (PTHR36615:SF7)
POPTR_007G076200v3	Uncharacterized protein;POPTR_007G076200;PTN008129535;orthologs	TRANSCRIPTION FACTOR SRM1 (PTHR44191:SF21)
POPTR_011G149500v3	HMA domain-containing protein;POPTR_011G149500;PTN001868496;orthologs	HEAVY METAL-ASSOCIATED ISOPRENYLATED PLANT PROTEIN 30 (PTHR22814:SF288)
POPTR_005G038600v3	Uncharacterized protein;POPTR_005G038600;PTN005124308;orthologs	HYPHALLY REGULATED CELL WALL PROTEIN 3 (PTHR40903:SF4)
POPTR_002G175200v3	Uncharacterized protein;POPTR_002G175200;PTN001959937;orthologs	CYTOCHROME P450 78A6 (PTHR47946:SF23)
POPTR_001G060400v3	Uncharacterized protein;POPTR_001G060400;PTN002045167;orthologs	OS02G0305950 PROTEIN (PTHR31374:SF118)
POPTR_017G147000v3	HMA domain-containing protein;POPTR_017G147000;PTN002335465;orthologs	HEAVY METAL-ASSOCIATED ISOPRENYLATED PLANT PROTEIN 12 (PTHR45811:SF80)
POPTR_009G099300v3	Polyadenylate-binding protein;POPTR_009G099300;PTN004648014;orthologs	POLYADENYLATE-BINDING PROTEIN 2 (PTHR24012:SF893)
POPTR_012G002700v3	Protein-serine/threonine phosphatase;POPTR_012G002700;PTN008270121;orthologs	PROTEIN PHOSPHATASE 2C 8-RELATED (PTHR47992:SF63)
POPTR_003G154500v3	Uncharacterized protein;POPTR_003G153900;PTN001763368;orthologs	OS06G0665100 PROTEIN (PTHR47105:SF1)
POPTR_008G170600v3	Uncharacterized protein;POPTR_008G170600;PTN007993995;orthologs	FK506-BINDING NUCLEAR-LIKE PROTEIN (PTHR33318:SF16)
POPTR_001G173500v3	WD_REPEATS_REGION domain-containing protein;POPTR_001G173500;PTN004518925;orthologs	PERIODIC TRYPTOPHAN PROTEIN 2 HOMOLOG (PTHR19858:SF0)
POPTR_002G003100v3	Pyrophosphate--fructose 6-phosphate 1-phosphotransferase subunit alpha;PFP-ALPHA;PTN002462544;orthologs	PYROPHOSPHATE--FRUCTOSE 6-PHOSPHATE 1-PHOSPHOTRANSFERASE SUBUNIT ALPHA 1 (PTHR43650:SF17)
POPTR_016G000600v3	Peptidase A1 domain-containing protein;POPTR_016G000600;PTN001785672;orthologs	ASPARTIC PROTEINASE 3-RELATED (PTHR47965:SF12)
POPTR_001G172700v3	Uncharacterized protein;POPTR_001G172700;PTN001896592;orthologs	OS02G0203700 PROTEIN (PTHR23111:SF74)
POPTR_014G075100v3	Non-specific serine/threonine protein kinase;POPTR_014G075100;PTN001936174;orthologs	SHAGGY-RELATED PROTEIN KINASE THETA (PTHR24057:SF60)
POPTR_013G110700v3	TCP family protein;POPTR_013G110700;PTN004757155;orthologs	TRANSCRIPTION FACTOR TCP23-LIKE (PTHR31072:SF108)
POPTR_018G007300v3	Uncharacterized protein;POPTR_018G007300;PTN002118268;orthologs	METHIONYL-TRNA SYNTHETASE (PTHR33320:SF32)
POPTR_001G044300v3	Uncharacterized protein;POPTR_001G044300;PTN005116266;orthologs	PHOTOSYNTHETIC NDH SUBUNIT OF SUBCOMPLEX B 1, CHLOROPLASTIC (PTHR37698:SF1)
POPTR_007G108500v3	Uncharacterized protein;POPTR_007G108400;PTN001707614;orthologs	ALCOHOL DEHYDROGENASE CLASS-P (PTHR43880:SF26)
POPTR_002G174700v3	LRAT domain-containing protein;POPTR_002G174700;PTN001795136;orthologs	OS09G0526800 PROTEIN (PTHR46137:SF2)
POPTR_010G198100v3	Uncharacterized protein;POPTR_010G198100;;orthologs
POPTR_004G040600v3	DUF3700 domain-containing protein;POPTR_004G040600;PTN005263454;orthologs	DUF3700 DOMAIN-CONTAINING PROTEIN (PTHR45952:SF6)
POPTR_001G190100v3	TauD domain-containing protein;POPTR_001G190100;PTN001642718;orthologs	TAUD DOMAIN-CONTAINING PROTEIN (PTHR10696:SF21)
POPTR_006G136600v3	Kinesin-like protein;POPTR_006G136600;PTN002380286;orthologs	KINESIN FAMILY MEMBER 11 (PTHR47970:SF12)
POPTR_016G052400v3	Uncharacterized protein;POPTR_016G052400;PTN002435035;orthologs	SUBFAMILY NOT NAMED (PTHR33659:SF11)
POPTR_010G140200v3	Usp domain-containing protein;POPTR_010G140200;PTN002423579;orthologs	ADENINE NUCLEOTIDE ALPHA HYDROLASES-LIKE SUPERFAMILY PROTEIN (PTHR47000:SF1)
POPTR_009G065100v3	Uncharacterized protein;POPTR_009G065100;PTN005382138;orthologs	CYTOCHROME P450, FAMILY 705, SUBFAMILY A, POLYPEPTIDE 25-RELATED (PTHR24298:SF59)
POPTR_002G123300v3	WRKY domain-containing protein;POPTR_002G123300;PTN002416158;orthologs	WRKY TRANSCRIPTION FACTOR 1 (PTHR31282:SF133)
POPTR_018G021900v3	AP2/ERF domain-containing protein;POPTR_018G021900;PTN002033801;orthologs	ETHYLENE-RESPONSIVE TRANSCRIPTION FACTOR ERF003 (PTHR31194:SF61)
POPTR_009G102400v3	Uncharacterized protein;POPTR_009G102400;PTN005090803;orthologs	PROTEIN DISULFIDE-ISOMERASE SCO2 (PTHR36035:SF1)
POPTR_003G136500v3	Uncharacterized protein;POPTR_003G136500;PTN005118278;orthologs	COX19-LIKE CHCH FAMILY PROTEIN (PTHR37750:SF1)
POPTR_011G055900v3	Squamosa promoter-binding-like protein;POPTR_011G055900;;orthologs
POPTR_001G238900v3	Uncharacterized protein;POPTR_001G238900;PTN005011432;orthologs	SUBFAMILY NOT NAMED (PTHR33544:SF5)
POPTR_006G010300v3	Uncharacterized protein;POPTR_006G010300;PTN002056309;orthologs	VINORINE SYNTHASE-LIKE (PTHR31623:SF28)
POPTR_009G005400v3	Uncharacterized protein;POPTR_009G005400;PTN002318092;orthologs	INTRINSIC PROTEIN, PUTATIVE-RELATED (PTHR45665:SF22)
POPTR_010G131100v3	Cytochrome b561 domain-containing protein;POPTR_010G131100;PTN002226475;orthologs	TRANSMEMBRANE ASCORBATE FERRIREDUCTASE 4-RELATED (PTHR10106:SF41)
POPTR_008G020900v3	PMR5N domain-containing protein;POPTR_008G020900;PTN002087153;orthologs	PROTEIN TRICHOME BIREFRINGENCE-LIKE 36 (PTHR32285:SF155)
POPTR_012G014300v3	F-box domain-containing protein;POPTR_012G014300;PTN002067077;orthologs	SWI-SNF-RELATED CHROMATIN BINDING PROTEIN (PTHR31790:SF505)
POPTR_002G030400v3	Uncharacterized protein;POPTR_002G030400;PTN008231214;orthologs	JACALIN-RELATED LECTIN 3 (PTHR47293:SF68)
POPTR_017G074600v3	Uncharacterized protein;POPTR_017G074600;PTN002152736;orthologs	CLAVATA3/ESR (CLE)-RELATED PROTEIN 25 (PTHR34277:SF18)
POPTR_006G192700v3	Uncharacterized protein;POPTR_006G192700;PTN001732427;orthologs	ACTIN-1-RELATED (PTHR11937:SF529)
POPTR_002G208100v3	Uncharacterized protein;POPTR_0020s00320g;PTN002421373;orthologs	ZINC FINGER PROTEIN CONSTANS-LIKE 13 (PTHR31717:SF58)
POPTR_008G149500v3	Protein kinase domain-containing protein;POPTR_008G149500;PTN008278442;orthologs	MITOGEN-ACTIVATED PROTEIN KINASE KINASE KINASE 19 (PTHR48016:SF56)
POPTR_004G140200v3	Uncharacterized protein;POPTR_004G140200;PTN004426176;orthologs	F14J22.5 PROTEIN (PTHR13593:SF134)
POPTR_006G046600v3	TPT domain-containing protein;POPTR_006G046600;PTN001672347;orthologs	TPT DOMAIN-CONTAINING PROTEIN (PTHR11132:SF239)
POPTR_003G133300v3	Uncharacterized protein;POPTR_003G133300;PTN002279332;orthologs	NADPH OXIDASE 4 (PTHR11972:SF153)
POPTR_001G334500v3	Uncharacterized protein;POPTR_001G334500;PTN002130847;orthologs	BNAA06G32290D PROTEIN (PTHR33595:SF26)
POPTR_006G167700v3	Uncharacterized protein;POPTR_006G167700;PTN002427631;orthologs	AP2-LIKE ETHYLENE-RESPONSIVE TRANSCRIPTION FACTOR AIL5 (PTHR32467:SF99)
POPTR_001G020900v3	Cytokinin dehydrogenase;POPTR_001G020900;PTN001793822;orthologs	CYTOKININ DEHYDROGENASE 6 (PTHR13878:SF53)
POPTR_002G082200v3	Response regulatory domain-containing protein;POPTR_002G082200;PTN002466785;orthologs	RESPONSE REGULATORY DOMAIN-CONTAINING PROTEIN (PTHR43874:SF96)
POPTR_011G089700v3	Uncharacterized protein;POPTR_011G089700;PTN008146947;orthologs	ANTHER-SPECIFIC PROLINE-RICH PROTEIN APG (PTHR45648:SF106)
POPTR_001G083700v3	Homeobox domain-containing protein;POPTR_001G083700;PTN002802828;orthologs	HOMEOBOX-LEUCINE ZIPPER PROTEIN ATHB-7-LIKE ISOFORM X1 (PTHR24326:SF552)
POPTR_009G089200v3	WD_REPEATS_REGION domain-containing protein;POPTR_009G089200;PTN002250588;orthologs	MITOTIC CHECKPOINT PROTEIN BUB3 (PTHR10971:SF5)
POPTR_003G087700v3	ARR-B family protein;POPTR_003G087700;PTN002041898;orthologs	TWO-COMPONENT RESPONSE REGULATOR-LIKE APRR2 (PTHR31312:SF4)
POPTR_013G147800v3	MSP domain-containing protein;POPTR_013G147800;PTN007465527;orthologs	VESICLE-ASSOCIATED PROTEIN 4-1 (PTHR10809:SF101)
POPTR_012G078900v3	RING-type E3 ubiquitin transferase;POPTR_012G078900;PTN001912647;orthologs	RING-TYPE E3 UBIQUITIN TRANSFERASE (PTHR23315:SF116)
POPTR_018G008500v3	WRKY family protein;POPTR_018G008500;PTN002040140;orthologs	WRKY TRANSCRIPTION FACTOR 17-RELATED (PTHR31282:SF104)
POPTR_006G013900v3	Uncharacterized protein;POPTR_006G013900;PTN007430481;orthologs	SOLUTE CARRIER FAMILY 13 MEMBER 2 (PTHR10283:SF82)
POPTR_008G070800v3	BHLH domain-containing protein;POPTR_008G070800;PTN001757363;orthologs	TRANSCRIPTION FACTOR BHLH51 (PTHR45844:SF18)
POPTR_013G025300v3	HMA domain-containing protein;POPTR_013G025300;PTN008169976;orthologs	HMA DOMAIN-CONTAINING PROTEIN (PTHR45868:SF83)
POPTR_002G257700v3	Uncharacterized protein;POPTR_002G257700;PTN002040452;orthologs	ACID PHOSPHATASE 1 (PTHR31284:SF57)
POPTR_004G148200v3	Uncharacterized protein;POPTR_004G148200;PTN002191679;orthologs	EXPRESSED PROTEIN (PTHR36346:SF2)
POPTR_004G067700v3	CDT1 domain-containing protein;POPTR_004G067700;PTN007822318;orthologs	EXPRESSED PROTEIN (PTHR28637:SF13)
POPTR_003G148100v3	Uncharacterized protein;POPTR_003G148100;PTN005021528;orthologs	PROTEIN, PUTATIVE-RELATED (PTHR33727:SF11)
POPTR_014G115800v3	Uncharacterized protein;POPTR_014G115800;PTN005017322;orthologs	PROTEIN NIM1-INTERACTING 3 (PTHR33669:SF14)
POPTR_018G090300v3	Plasma membrane ATPase;POPTR_018G090300;PTN001943490;orthologs	ATPASE 2, PLASMA MEMBRANE-TYPE (PTHR42861:SF124)
POPTR_004G162600v3	DBB family protein;POPTR_004G162600;PTN002068611;orthologs	OS09G0527900 PROTEIN (PTHR31832:SF86)
POPTR_010G055100v3	HORMA domain-containing protein;POPTR_010G055100;PTN002274579;orthologs	MITOTIC SPINDLE ASSEMBLY CHECKPOINT PROTEIN MAD2A (PTHR11842:SF11)
POPTR_007G126800v3	MFS domain-containing protein;POPTR_007G126800;PTN002781814;orthologs	PROTON MYO-INOSITOL COTRANSPORTER (PTHR48020:SF12)
POPTR_005G118700v3	Peroxidase;PRX34;PTN002047303;orthologs	PEROXIDASE 72 (PTHR31388:SF3)
POPTR_001G343800v3	NAC domain-containing protein;POPTR_001G343800;PTN004758187;orthologs	NAC DOMAIN CONTAINING PROTEIN 44-RELATED (PTHR31079:SF2)
POPTR_019G083000v3	ABC transporter domain-containing protein;POPTR_019G083000;PTN001829339;orthologs	ABC TRANSPORTER G FAMILY MEMBER 25 (PTHR48041:SF56)
POPTR_007G066700v3	LOB domain-containing protein;POPTR_007G066700;PTN002041419;orthologs	LOB DOMAIN-CONTAINING PROTEIN 3 (PTHR31301:SF58)
POPTR_006G043400v3	Uncharacterized protein;POPTR_006G043400;PTN001974684;orthologs	REGULATORY PROTEIN NPR5 (PTHR46668:SF1)
POPTR_001G325200v3	Glycerophosphodiester phosphodiesterase;POPTR_001G325200;PTN002344042;orthologs	GLYCEROPHOSPHOCHOLINE PHOSPHODIESTERASE GPCPD1 (PTHR22958:SF1)
POPTR_016G009300v3	Cation_ATPase_C domain-containing protein;POPTR_016G009300;PTN004668835;orthologs	CALCIUM-TRANSPORTING ATPASE 12, PLASMA MEMBRANE-TYPE-LIKE (PTHR24093:SF470)
POPTR_009G135400v3	Uncharacterized protein;POPTR_009G135400;PTN008083486;orthologs	RING-TYPE DOMAIN-CONTAINING PROTEIN (PTHR42647:SF6)
POPTR_011G112400v3	Uncharacterized protein;POPTR_011G112400;PTN001631927;orthologs	9-CIS-EPOXYCAROTENOID DIOXYGENASE NCED3, CHLOROPLASTIC (PTHR10543:SF26)
POPTR_010G088300v3	CRAL-TRIO domain-containing protein;POPTR_010G088300;PTN002228976;orthologs	SEC14P-LIKE PHOSPHATIDYLINOSITOL TRANSFER FAMILY PROTEIN (PTHR47104:SF1)
POPTR_014G027900v3	Remorin_C domain-containing protein;POPTR_014G027900;PTN002418345;orthologs	REMORIN FAMILY PROTEIN (PTHR31471:SF13)
POPTR_006G069100v3	Uncharacterized protein;POPTR_006G069100;PTN002434555;orthologs	OS06G0604600 PROTEIN (PTHR33564:SF11)
POPTR_012G144900v3	Protein DETOXIFICATION;POPTR_012G144900;PTN002257050;orthologs	PROTEIN DETOXIFICATION 35 (PTHR11206:SF359)
POPTR_018G031600v3	Uncharacterized protein;POPTR_018G031600;PTN008160306;orthologs	CHANNEL AKT6, PUTATIVE-RELATED (PTHR45743:SF25)
POPTR_019G100800v3	RING-type domain-containing protein;POPTR_019G100800;PTN001747883;orthologs	E3 UBIQUITIN-PROTEIN LIGASE RMA1 (PTHR12313:SF59)
POPTR_011G120800v3	RING-type domain-containing protein;POPTR_011G120800;PTN004350843;orthologs	E3 UBIQUITIN-PROTEIN LIGASE RMA3 (PTHR12313:SF69)
POPTR_006G016900v3	CASP-like protein 2B2;POPTRDRAFT_818956;PTN001699873;orthologs	CASP-LIKE PROTEIN 2B2 (PTHR11615:SF100)
POPTR_010G108000v3	Endoplasmic reticulum transmembrane protein;POPTR_010G108000;PTN001762524;orthologs	ENDOPLASMIC RETICULUM TRANSMEMBRANE PROTEIN (PTHR12701:SF12)
POPTR_007G020500v3	AAA domain-containing protein;POPTR_007G020500;PTN001891301;orthologs	AAA DOMAIN-CONTAINING PROTEIN (PTHR23070:SF153)
POPTR_009G139400v3	Uncharacterized protein;POPTR_009G139400;PTN002356147;orthologs	SERINE/THREONINE-PROTEIN KINASE STY46 (PTHR44329:SF128)
POPTR_008G133000v3	Dynein light chain;POPTR_008G133000;PTN001726074;orthologs	DYNEIN LIGHT CHAIN (PTHR11886:SF39)
POPTR_003G101000v3	NB-ARC domain-containing protein;POPTR_003G101000;PTN008461147;orthologs	GH06740P (PTHR45752:SF187)
POPTR_014G161300v3	Formate dehydrogenase, mitochondrial;POPTR_014G161300;PTN001662104;orthologs	FORMATE DEHYDROGENASE 1 (PTHR42938:SF9)
POPTR_006G136900v3	Uncharacterized protein;POPTR_006G136900;PTN008113450;orthologs	ALPHA/BETA-HYDROLASES SUPERFAMILY PROTEIN (PTHR43592:SF20)
POPTR_001G098700v3	WD_REPEATS_REGION domain-containing protein;POPTR_001G098700;PTN008128494;orthologs	WD REPEAT-CONTAINING PROTEIN POP1 (PTHR44129:SF13)
POPTR_002G060100v3	Uncharacterized protein;POPTR_002G060100;PTN002105807;orthologs	TRANSCRIPTION FACTOR PAR2 (PTHR33124:SF43)
POPTR_011G021000v3	Uncharacterized protein;POPTR_011G021000;PTN001876813;orthologs	PROTEIN CLMP1 (PTHR46183:SF8)
POPTR_010G104200v3	Uncharacterized protein;POPTR_010G104200;PTN004888795;orthologs	PROTEIN CCC1 (PTHR31851:SF52)
POPTR_005G085200v3	WRKY domain-containing protein;POPTR_005G085200;PTN004782821;orthologs	WRKY TRANSCRIPTION FACTOR 59-RELATED (PTHR31221:SF283)
POPTR_001G213700v3	Uncharacterized protein;POPTR_001G213700;PTN004578754;orthologs	PROTEIN ARGONAUTE 5 (PTHR22891:SF24)
POPTR_005G251400v3	B-like cyclin;POPTR_005G251400;PTN007424248;orthologs	CYCLIN-B2-4 (PTHR10177:SF402)
POPTR_016G013700v3	Uncharacterized protein;POPTR_016G013700;PTN007474662;orthologs	LD16419P (PTHR10980:SF3)
POPTR_018G071400v3	Uncharacterized protein;POPTR_018G071400;PTN002230624;orthologs	POTASSIUM CHANNEL AKT1 (PTHR45743:SF2)
POPTR_010G178200v3	Acetohydroxy-acid synthase small subunit;POPTR_010G178200;PTN004740269;orthologs	ACETOLACTATE SYNTHASE SMALL SUBUNIT 1, CHLOROPLASTIC (PTHR30239:SF18)
POPTR_004G175400v3	HMA domain-containing protein;POPTR_004G175400;PTN001868677;orthologs	HEAVY METAL-ASSOCIATED ISOPRENYLATED PLANT PROTEIN 26 (PTHR22814:SF302)
POPTR_001G041400v3	Tub domain-containing protein;POPTR_001G041400;PTN001818870;orthologs	TUBBY-LIKE PROTEIN 8 (PTHR16517:SF131)
POPTR_007G119300v3	SET domain-containing protein;POPTR_007G119300;PTN005314884;orthologs	HISTONE-LYSINE N-METHYLTRANSFERASE ATXR3 (PTHR46655:SF1)
POPTR_018G016400v3	Uncharacterized protein;POPTR_018G016400;PTN002312181;orthologs	OS09G0423700 PROTEIN (PTHR15852:SF66)
POPTR_015G040100v3	Protein kinase domain-containing protein;POPTR_015G040100;PTN008132063;orthologs	MITOGEN-ACTIVATED PROTEIN KINASE KINASE KINASE (PTHR44329:SF146)
POPTR_001G225800v3	Cysteine proteinase inhibitor;POPTR_001G225800;PTN001686334;orthologs	MULTICYSTATIN (PTHR11413:SF116)
POPTR_014G109200v3	S5A_REDUCTASE domain-containing protein;POPTR_014G109200;PTN002086255;orthologs	3-OXO-5-ALPHA-STEROID 4-DEHYDROGENASE (DUF1295) (PTHR32251:SF23)
POPTR_017G146600v3	HATPase_c domain-containing protein;POPTR_017G146600;PTN004267673;orthologs	HEAT SHOCK PROTEIN 90-1 (PTHR11528:SF130)
POPTR_009G004000v3	Cyclin-dependent kinases regulatory subunit;POPTR_009G004000;PTN004637167;orthologs	CYCLIN-DEPENDENT KINASES REGULATORY SUBUNIT 2 (PTHR23415:SF47)
POPTR_002G141200v3	AP2/ERF domain-containing protein;POPTR_002G141200;PTN004910417;orthologs	ETHYLENE-RESPONSIVE TRANSCRIPTION FACTOR ERF034-RELATED (PTHR31985:SF285)
POPTR_006G104300v3	Protein kinase domain-containing protein;POPTR_006G104300;PTN002407256;orthologs	PROBABLY INACTIVE LEUCINE-RICH REPEAT RECEPTOR-LIKE PROTEIN KINASE IMK2 (PTHR48008:SF2)
POPTR_001G269400v3	Uncharacterized protein;POPTR_001G269400;PTN001636676;orthologs	ZINC FINGER A20 AND AN1 DOMAIN-CONTAINING STRESS-ASSOCIATED PROTEIN 5 (PTHR10634:SF22)
POPTR_005G235700v3	Histone H3;POPTR_002G026800;PTN001686703;orthologs	HISTONE H3.3 (PTHR11426:SF210)
POPTR_016G142000v3	Uncharacterized protein;POPTR_016G142000;PTN002248917;orthologs	CALCIUM-BINDING PROTEIN CML42 (PTHR10891:SF743)
POPTR_010G148200v3	Uncharacterized protein;POPTR_010G148200;PTN005040068;orthologs	PROTEIN, PUTATIVE-RELATED (PTHR34188:SF20)
POPTR_002G023900v3	Endoglucanase;GH9B1;PTN001858985;orthologs	ENDOGLUCANASE 2 (PTHR22298:SF114)
POPTR_006G189300v3	Transmembrane 9 superfamily member;POPTR_006G189300;PTN002243501;orthologs	TRANSMEMBRANE 9 SUPERFAMILY MEMBER (PTHR10766:SF55)
POPTR_005G002100v3	Uncharacterized protein;POPTR_005G002100;PTN001855883;orthologs	HYDROPHOBIC PROTEIN LTI6B (PTHR21659:SF120)
POPTR_009G114600v3	BURP domain-containing protein;POPTR_009G114600;PTN002415700;orthologs	BURP DOMAIN-CONTAINING PROTEIN (PTHR31236:SF32)
POPTR_004G073600v3	HATPase_c domain-containing protein;POPTR_004G073600;PTN001693341;orthologs	HEAT SHOCK PROTEIN 90-1 (PTHR11528:SF130)
POPTR_015G063700v3	Uncharacterized protein;POPTR_015G063700;PTN002157574;orthologs	MICROTUBULE-ASSOCIATED FUTSCH-LIKE PROTEIN (PTHR34468:SF2)
POPTR_006G237500v3	Uncharacterized protein;POPTR_006G237500;PTN005263222;orthologs	HOMEOBOX-LEUCINE ZIPPER PROTEIN ATHB-8 (PTHR45950:SF6)
POPTR_009G031800v3	Expansin;POPTR_009G031800;PTN007924338;orthologs	EXPANSIN (PTHR31867:SF234)
POPTR_003G165600v3	GRAM domain-containing protein;POPTR_003G165600;PTN002423685;orthologs	GEM-LIKE PROTEIN 5 (PTHR31969:SF3)
POPTR_007G097000v3	Uncharacterized protein;POPTR_007G097000;PTN002146081;orthologs	AVR9/CF-9 RAPIDLY ELICITED PROTEIN 75 (PTHR34046:SF19)
POPTR_004G001800v3	Uncharacterized protein;POPTR_004G001800;PTN002422857;orthologs	F12F1.11-RELATED (PTHR31903:SF6)
POPTR_006G152800v3	LRRNT_2 domain-containing protein;POPTR_006G152800;PTN001986555;orthologs	EXTENSIN-LIKE PROTEIN (PTHR32093:SF86)
POPTR_010G053400v3	SHSP domain-containing protein;POPTR_010G053400;PTN002264188;orthologs	SHSP DOMAIN-CONTAINING PROTEIN (PTHR46733:SF10)
POPTR_018G116000v3	Uncharacterized protein;POPTR_018G116000;PTN002027546;orthologs	PROTEIN RGF1 INDUCIBLE TRANSCRIPTION FACTOR 1 (PTHR31065:SF11)
POPTR_014G180100v3	Uncharacterized protein;POPTR_014G180100;PTN004682648;orthologs	ABC TRANSPORTER C FAMILY MEMBER 15-RELATED (PTHR24223:SF165)
POPTR_010G074300v3	Ethylene receptor;POPTR_010G074300;PTN001975843;orthologs	ETHYLENE RECEPTOR 2 (PTHR24423:SF633)
POPTR_011G090200v3	Uncharacterized protein;POPTR_011G090200;PTN007843122;orthologs	187-KDA MICROTUBULE-ASSOCIATED PROTEIN AIR9 (PTHR31149:SF11)
POPTR_005G229700v3	Glucose-1-phosphate adenylyltransferase;POPTR_005G229700;PTN002460866;orthologs	GLUCOSE-1-PHOSPHATE ADENYLYLTRANSFERASE LARGE SUBUNIT 1, CHLOROPLASTIC-RELATED (PTHR43523:SF12)
POPTR_017G001400v3	Uncharacterized protein;POPTR_017G001400;PTN002187279;orthologs	ARGOS-LIKE PROTEIN (PTHR36023:SF3)
POPTR_001G141600v3	Uncharacterized protein;POPTR_001G141600;PTN002058779;orthologs	OS04G0591300 PROTEIN (PTHR34197:SF2)
POPTR_004G042700v3	RING-type domain-containing protein;POPTR_004G042700;PTN001747866;orthologs	RING-TYPE DOMAIN-CONTAINING PROTEIN (PTHR12313:SF89)
POPTR_005G179100v3	Uncharacterized protein;POPTR_005G179100;PTN007692760;orthologs	FAMILY PROTEIN, PUTATIVE (DUF630 AND DUF632)-RELATED (PTHR21450:SF2)
POPTR_009G141600v3	NAC domain-containing protein;POPTR_009G141600;PTN004912017;orthologs	NAC DOMAIN CONTAINING PROTEIN 36 (PTHR31989:SF132)
POPTR_014G161200v3	Uncharacterized protein;POPTR_014G161200;PTN001655176;orthologs	OS09G0482800 PROTEIN (PTHR34574:SF10)
POPTR_002G100600v3	Homeobox domain-containing protein;POPTR_002G100600;PTN001964509;orthologs	HOMEOBOX DOMAIN-CONTAINING PROTEIN (PTHR24326:SF535)
POPTR_009G089400v3	Uncharacterized protein;POPTR_009G089400;PTN001981047;orthologs	ZINC FINGER PROTEIN ZAT6 (PTHR45988:SF1)
POPTR_014G134200v3	Glutaredoxin 20;GRX20;PTN001606474;orthologs	GLUTAREDOXIN-C12-RELATED (PTHR10168:SF118)
POPTR_001G059500v3	Uncharacterized protein;POPTR_001G059500;PTN002435754;orthologs	OS04G0386700 PROTEIN (PTHR33829:SF2)
POPTR_009G156000v3	Kinesin motor domain-containing protein;POPTR_009G156000;PTN004673833;orthologs	KINESIN-LIKE PROTEIN KIN-12E (PTHR37739:SF14)
POPTR_007G099800v3	Beta-galactosidase;POPTR_007G099800;PTN002361496;orthologs	BETA-GALACTOSIDASE 10 (PTHR23421:SF67)
POPTR_001G423600v3	Uncharacterized protein;POPTR_001G423600;PTN004423184;orthologs	NUCLEOLAR PRE-RIBOSOMAL-ASSOCIATED PROTEIN 1 (PTHR13500:SF0)
POPTR_014G090300v3	WRKY family protein;POPTR_014G090300;PTN002425251;orthologs	WRKY TRANSCRIPTION FACTOR 22 (PTHR32096:SF61)
POPTR_009G104000v3	Abhydrolase_3 domain-containing protein;POPTR_009G104000;PTN002346260;orthologs	CARBOXYLESTERASE 13-RELATED (PTHR23024:SF467)
POPTR_001G082500v3	Uncharacterized protein;POPTR_001G082500;PTN002202884;orthologs	NADP-SPECIFIC GLUTAMATE DEHYDROGENASE (PTHR37244:SF1)
POPTR_015G066500v3	USP domain-containing protein;POPTR_015G066500;PTN007723111;orthologs	ECHINUS SPLICE FORM 3 (PTHR22975:SF9)
POPTR_014G164700v3	Histidine kinase;POPTR_014G164700;PTN008118058;orthologs	HISTIDINE KINASE 2 (PTHR43719:SF35)
POPTR_005G244700v3	Phorbol-ester/DAG-type domain-containing protein;POPTR_005G244700;PTN001793320;orthologs	NUCLEOREDOXIN 2-RELATED (PTHR13871:SF7)
POPTR_003G103900v3	Ubiquinol oxidase;POPTR_003G103900;PTN004885131;orthologs	UBIQUINOL OXIDASE 3, MITOCHONDRIAL (PTHR31803:SF7)
POPTR_006G114200v3	GRAS domain-containing protein;POPTR_006G114200;PTN002057439;orthologs	PROTEIN SCARECROW (PTHR31636:SF12)
POPTR_010G183900v3	Uncharacterized protein;POPTR_010G183900;PTN002415209;orthologs	ABSCISIC ACID RECEPTOR PYL4 (PTHR31213:SF119)
POPTR_005G144200v3	Protein kinase domain-containing protein;POPTR_005G144200;PTN002406415;orthologs	PROTEIN KINASE DOMAIN-CONTAINING PROTEIN (PTHR27003:SF325)
POPTR_002G112100v3	Aa_trans domain-containing protein;POPTR_002G112100;PTN008279700;orthologs	AMINO ACID PERMEASE 6 (PTHR48017:SF140)
POPTR_014G086300v3	Cysteine synthase;POPTR_014G086300;PTN001618208;orthologs	BIFUNCTIONAL L-3-CYANOALANINE SYNTHASE/CYSTEINE SYNTHASE C1, MITOCHONDRIAL (PTHR10314:SF80)
POPTR_007G044300v3	Zeaxanthin epoxidase, chloroplastic;POPTR_007G044300;PTN008207637;orthologs	ZEAXANTHIN EPOXIDASE, CHLOROPLASTIC (PTHR46496:SF1)
POPTR_005G195000v3	AP2/ERF domain-containing protein;POPTR_005G195000;PTN007847564;orthologs	ETHYLENE-RESPONSIVE TRANSCRIPTION FACTOR ABR1 (PTHR31190:SF324)
POPTR_008G122100v3	Uncharacterized protein;POPTR_008G122100;PTN002240065;orthologs	TRANSCRIPTION FACTOR MYB62 (PTHR45675:SF30)
POPTR_003G100100v3	HTH myb-type domain-containing protein;POPTR_003G100100;PTN008419941;orthologs	MYB FAMILY TRANSCRIPTION FACTOR PHL11 (PTHR31499:SF23)
POPTR_001G404400v3	NAC family protein;POPTR_001G404400;PTN002063826;orthologs	NAC TRANSCRIPTION FACTOR 25 (PTHR31719:SF148)
POPTR_009G070400v3	C2 domain-containing protein;POPTR_009G070400;PTN004777089;orthologs	OS01G0953500 PROTEIN (PTHR31208:SF3)
POPTR_015G012300v3	Longin domain-containing protein;POPTR_015G012300;PTN001844526;orthologs	PHYTOLONGIN PHYL2.2 (PTHR47461:SF3)
POPTR_009G130400v3	Amidase domain-containing protein;POPTR_009G130400;PTN005125736;orthologs	AMIDASE C869.01-RELATED (PTHR42678:SF25)
POPTR_011G007400v3	Protein kinase domain-containing protein;POPTR_011G007400;PTN004698209;orthologs	PROTEIN KINASE DOMAIN-CONTAINING PROTEIN (PTHR48011:SF6)
POPTR_017G107300v3	Uncharacterized protein;POPTR_017G107300;PTN002114303;orthologs	PROTEIN GLUTAMINE DUMPER 7 (PTHR33228:SF76)
POPTR_008G147600v3	Uncharacterized protein;POPTR_008G147600;PTN001647506;orthologs	CAAX AMINO TERMINAL PROTEASE FAMILY PROTEIN (PTHR43592:SF15)
POPTR_010G251000v3	Uncharacterized protein;POPTR_010G251000;PTN002432799;orthologs	SUBFAMILY NOT NAMED (PTHR33320:SF34)
POPTR_002G029100v3	WAT1-related protein;POPTR_002G029100;PTN007852024;orthologs	PROTEIN WALLS ARE THIN 1 (PTHR31218:SF1)
POPTR_008G096500v3	Uncharacterized protein;POPTR_008G096500;PTN004822396;orthologs	NINJA-FAMILY PROTEIN AFP1 (PTHR31413:SF46)
POPTR_006G181100v3	DNA-directed RNA polymerase;POPTR_006G181100;PTN001602025;orthologs	DNA-DIRECTED RNA POLYMERASE 3, CHLOROPLASTIC (PTHR10102:SF1)
POPTR_001G452000v3	F-box domain-containing protein;POPTR_001G452000;PTN002136472;orthologs	FAMILY PROTEIN, PUTATIVE-RELATED (PTHR33736:SF15)
POPTR_006G251300v3	Uncharacterized protein;POPTR_006G251300;PTN001896589;orthologs	ZINC FINGER (RAN-BINDING) FAMILY PROTEIN (PTHR23111:SF97)
POPTR_011G166500v3	J domain-containing protein;POPTR_011G166500;PTN002376777;orthologs	J DOMAIN-CONTAINING PROTEIN (PTHR45432:SF6)
POPTR_005G048700v3	Cysteine synthase;POPTR_005G048700;PTN002232463;orthologs	BIFUNCTIONAL L-3-CYANOALANINE SYNTHASE/CYSTEINE SYNTHASE D2 (PTHR10314:SF245)
POPTR_004G207100v3	MFS domain-containing protein;POPTR_004G207100;PTN002362335;orthologs	MONOSACCHARIDE-SENSING PROTEIN 2 (PTHR48021:SF85)
POPTR_013G043700v3	SSXT domain-containing protein;POPTR_013G043700;PTN001896342;orthologs	GRF1-INTERACTING FACTOR 1 (PTHR23107:SF18)
POPTR_017G059400v3	Adenosylhomocysteinase;POPTR_017G059400;PTN001917802;orthologs	ADENOSYLHOMOCYSTEINASE 1 (PTHR23420:SF29)
POPTR_009G165800v3	B-like cyclin;POPTR_009G165800;PTN004131861;orthologs	G2/MITOTIC-SPECIFIC CYCLIN-2-LIKE (PTHR10177:SF540)
POPTR_010G055200v3	Uncharacterized protein;POPTR_010G055200;PTN004682725;orthologs	OS01G0902100 PROTEIN (PTHR24223:SF222)
POPTR_014G133700v3	Glutaredoxin 17;GRX17;PTN001606440;orthologs	MONOTHIOL GLUTAREDOXIN-S6 (PTHR10168:SF200)
POPTR_010G193500v3	Uncharacterized protein;POPTR_010G193500;PTN002416209;orthologs	ACID PHOSPHATASE-LIKE PROTEIN (PTHR31284:SF22)
POPTR_004G145800v3	Kinesin motor domain-containing protein;POPTR_004G145800;PTN005117805;orthologs	KINESIN-LIKE PROTEIN KIN-12D (PTHR37739:SF8)
POPTR_002G125400v3	BZIP domain-containing protein;POPTR_002G125400;PTN001882484;orthologs	ABSCISIC ACID-INSENSITIVE 5-LIKE PROTEIN 5-RELATED (PTHR22952:SF446)
POPTR_005G108900v3	Peroxidase;POPTR_005G108900;PTN004787767;orthologs	PEROXIDASE (PTHR31235:SF181)
POPTR_006G092300v3	Uncharacterized protein;POPTR_006G092300;PTN005108473;orthologs	SUBFAMILY NOT NAMED (PTHR37078:SF6)
POPTR_018G091600v3	Uncharacterized protein;POPTR_018G091600;PTN004948043;orthologs	AP2-LIKE ETHYLENE-RESPONSIVE TRANSCRIPTION FACTOR AIL5 (PTHR32467:SF99)
POPTR_008G104500v3	Uncharacterized protein;POPTR_008G104500;PTN001733012;orthologs	ZGC:101569 (PTHR43802:SF1)
POPTR_019G010600v3	RING-type E3 ubiquitin transferase;POPTR_019G010600;PTN005325408;orthologs	RING-H2 FINGER PROTEIN ATL78 (PTHR46905:SF7)
POPTR_005G112100v3	TPR_REGION domain-containing protein;POPTR_005G112100;PTN002442736;orthologs	PROTEIN POLLENLESS 3-LIKE 2 (PTHR36326:SF7)
POPTR_003G172600v3	SBP-type domain-containing protein;POPTR_003G172600;PTN007859381;orthologs	SQUAMOSA PROMOTER-BINDING-LIKE PROTEIN 2 (PTHR31251:SF74)
POPTR_006G118000v3	Exostosin domain-containing protein;POPTR_006G118000;PTN007482987;orthologs	OS07G0188700 PROTEIN (PTHR11062:SF207)
POPTR_008G184400v3	Uncharacterized protein;POPTR_008G184400;PTN002387132;orthologs	CYTOCHROME P450 71B4 (PTHR47956:SF17)
POPTR_009G044200v3	TPR_REGION domain-containing protein;POPTR_009G044200;PTN004707199;orthologs	OS01G0855200 PROTEIN (PTHR26312:SF132)
POPTR_007G105800v3	Uncharacterized protein;POPTR_007G105800;PTN004806886;orthologs	PECTIN LYASE-LIKE SUPERFAMILY PROTEIN (PTHR31339:SF4)
POPTR_008G132600v3	PMEI domain-containing protein;POPTR_008G132600;PTN002414198;orthologs	PLANT INVERTASE/PECTIN METHYLESTERASE INHIBITOR SUPERFAMILY PROTEIN (PTHR31080:SF64)
POPTR_001G046400v3	Epimerase domain-containing protein;POPTR_001G046400;PTN002233879;orthologs	CINNAMOYL-COA REDUCTASE 1 (PTHR10366:SF404)
POPTR_001G097600v3	AAA domain-containing protein;POPTR_001G097600;PTN008145582;orthologs	P-LOOP CONTAINING NUCLEOSIDE TRIPHOSPHATE HYDROLASES SUPERFAMILY PROTEIN (PTHR45644:SF56)
POPTR_014G171300v3	Uncharacterized protein;POPTR_014G171300;PTN005300583;orthologs	HEAVY METAL-ASSOCIATED ISOPRENYLATED PLANT PROTEIN 46 (PTHR46371:SF7)
POPTR_017G096500v3	Uncharacterized protein;POPTR_017G096500;PTN002216381;orthologs	PROTEIN RALF-LIKE 27 (PTHR39112:SF1)
POPTR_004G069200v3	Uncharacterized protein;POPTR_004G069200;PTN004854559;orthologs	METAL-NICOTIANAMINE TRANSPORTER YSL8-RELATED (PTHR31645:SF76)
POPTR_011G071800v3	BES1_N domain-containing protein;POPTR_011G071800;PTN004833963;orthologs	BES1/BZR1 HOMOLOG PROTEIN 3 (PTHR31506:SF45)
POPTR_008G158800v3	Uncharacterized protein;POPTR_008G158800;PTN001875716;orthologs	PROTEIN ARGONAUTE 10 (PTHR22891:SF122)
POPTR_005G018700v3	H(+)-exporting diphosphatase;POPTR_005G018700;PTN002077605;orthologs	H(+)-EXPORTING DIPHOSPHATASE (PTHR31998:SF46)
POPTR_015G005500v3	RRM domain-containing protein;POPTR_015G005500;PTN002547312;orthologs	HETEROGENEOUS NUCLEAR RIBONUCLEOPROTEIN A0 (PTHR48024:SF29)
POPTR_006G056400v3	J domain-containing protein;POPTR_006G056400;PTN005204105;orthologs	CHAPERONE DNAJ-DOMAIN SUPERFAMILY PROTEIN-RELATED (PTHR44916:SF1)
POPTR_003G104000v3	Uncharacterized protein;POPTR_003G104000;PTN002274068;orthologs	UREA ACTIVE TRANSPORTER (PTHR46154:SF4)
POPTR_005G053800v3	Auxin-responsive protein;POPTR_005G053800;PTN002064683;orthologs	AUXIN-RESPONSIVE PROTEIN (PTHR31734:SF247)
POPTR_008G087700v3	Uncharacterized protein;POPTR_008G087700;PTN002126059;orthologs	SUBFAMILY NOT NAMED (PTHR33474:SF22)
POPTR_012G016600v3	Uncharacterized protein;POPTR_012G016600;PTN001854565;orthologs	RIBONUCLEASE P PROTEIN SUBUNIT P38-LIKE PROTEIN (PTHR47747:SF2)
POPTR_011G140800v3	Tau class glutathione transferase GSTU30;POPTR_011G140800;PTN001680832;orthologs	GLUTATHIONE S-TRANSFERASE U19 (PTHR11260:SF781)
POPTR_016G000300v3	Uncharacterized protein;POPTR_016G000300;PTN002422271;orthologs	PROTEIN ENDOSPERM DEFECTIVE 1-RELATED (PTHR31807:SF6)
POPTR_010G094300v3	Potassium transporter;POPTR_010G094300;PTN002022375;orthologs	POTASSIUM TRANSPORTER 6 (PTHR30540:SF98)
POPTR_010G200200v3	Formylglycinamide ribonucleotide amidotransferase;POPTR_010G200200;PTN004124047;orthologs	PHOSPHORIBOSYLFORMYLGLYCINAMIDINE SYNTHASE (PTHR10099:SF1)
POPTR_015G014000v3	CCT domain-containing protein;POPTR_015G014000;PTN002421354;orthologs	CCT MOTIF FAMILY PROTEIN (PTHR31717:SF2)
POPTR_009G003100v3	Carboxypeptidase;POPTR_009G003100;PTN004309065;orthologs	RETINOID-INDUCIBLE SERINE CARBOXYPEPTIDASE (PTHR11802:SF3)
POPTR_003G072700v3	Pectinesterase;POPTR_003G072700;PTN002062510;orthologs	PECTINESTERASE 1-RELATED (PTHR31707:SF219)
POPTR_009G113600v3	MFS domain-containing protein;POPTR_009G113600;PTN001920365;orthologs	POLYOL TRANSPORTER 5 (PTHR23500:SF424)
POPTR_005G122400v3	Uncharacterized protein;POPTR_005G122400;PTN005342999;orthologs	LATE EMBRYOGENESIS ABUNDANT (LEA) PROTEIN-RELATED (PTHR47372:SF33)
POPTR_018G130000v3	Uncharacterized protein;POPTR_018G130000;PTN004148693;orthologs	EQUILIBRATIVE NUCLEOTIDE TRANSPORTER 8 (PTHR10332:SF77)
POPTR_017G055700v3	X8 domain-containing protein;POPTR_017G055700;PTN004749738;orthologs	CARBOHYDRATE-BINDING X8 DOMAIN SUPERFAMILY PROTEIN (PTHR31044:SF47)
POPTR_001G102600v3	CASP-like protein;POPTR_001G102600;PTN002130200;orthologs	CASP-LIKE PROTEIN 4A4 (PTHR33573:SF15)
POPTR_014G070000v3	AT-hook motif nuclear-localized protein;POPTR_014G070000;PTN002051579;orthologs	AT-HOOK MOTIF NUCLEAR-LOCALIZED PROTEIN 7 (PTHR31500:SF96)
POPTR_007G026500v3	Uncharacterized protein;POPTR_007G026500;PTN004686806;orthologs	CYTOCHROME P450 90B1 (PTHR24286:SF194)
POPTR_016G098200v3	Uncharacterized protein;POPTR_016G098200;PTN001827801;orthologs	AQUAPORIN TIP1-1 (PTHR45665:SF54)
POPTR_017G002400v3	DUF4283 domain-containing protein;POPTR_017G002400;PTN004798387;orthologs	DUF4283 DOMAIN-CONTAINING PROTEIN (PTHR31286:SF140)
POPTR_001G122400v3	L-lactate dehydrogenase;POPTR_001G122400;PTN002454967;orthologs	L-LACTATE DEHYDROGENASE (PTHR43128:SF16)
POPTR_003G062400v3	VOC domain-containing protein;POPTR_003G062400;PTN002234085;orthologs	F18B13.24 PROTEIN (PTHR46142:SF3)
POPTR_006G267900v3	Uncharacterized protein;POPTR_006G267900;PTN002432081;orthologs	PROTEIN GLUTAMINE DUMPER 5 (PTHR33228:SF49)
POPTR_001G050100v3	F-box domain-containing protein;POPTR_001G050100;PTN002086750;orthologs	F-BOX DOMAIN-CONTAINING PROTEIN (PTHR32278:SF135)
POPTR_003G089800v3	NAC domain-containing protein;POPTR_003G089800;PTN007937424;orthologs	NAC DOMAIN-CONTAINING PROTEIN 71 (PTHR31989:SF51)
POPTR_006G235000v3	Aurora kinase;POPTR_006G235000;PTN001967852;orthologs	SERINE/THREONINE-PROTEIN KINASE AURORA-1-RELATED (PTHR24350:SF32)
POPTR_010G124400v3	Uncharacterized protein;POPTR_010G124400;PTN002121561;orthologs	BNAA05G33450D PROTEIN (PTHR33384:SF46)
POPTR_018G119600v3	RING-type domain-containing protein;POPTR_0025s00570g;PTN002031243;orthologs	ZINC ION BINDING PROTEIN (PTHR31150:SF6)
POPTR_005G101600v3	Lgl_C domain-containing protein;POPTR_005G101600;PTN004140923;orthologs	TRANSDUCIN/WD40 REPEAT-LIKE SUPERFAMILY PROTEIN (PTHR10241:SF27)
POPTR_015G144200v3	Uncharacterized protein;POPTR_015G144200;PTN005251698;orthologs	HEAVY METAL-ASSOCIATED ISOPRENYLATED PLANT PROTEIN 39-LIKE ISOFORM X1 (PTHR45811:SF43)
POPTR_006G003000v3	NPH3 domain-containing protein;POPTR_006G003000;PTN004942065;orthologs	NPH3 DOMAIN-CONTAINING PROTEIN (PTHR32370:SF106)
POPTR_015G146900v3	CitMHS domain-containing protein;POPTR_015G146900;PTN002457603;orthologs	TRANSPORTER ARSB-RELATED (PTHR43302:SF5)
POPTR_008G207500v3	Uncharacterized protein;POPTR_008G207500;PTN008039716;orthologs	UVEAL AUTOANTIGEN WITH COILED-COIL/ANKYRIN (PTHR34681:SF2)
POPTR_005G239100v3	Uncharacterized protein;POPTR_005G239100;PTN007741083;orthologs	SUBFAMILY NOT NAMED (PTHR23201:SF152)
POPTR_010G113900v3	RING-type E3 ubiquitin transferase;POPTR_010G113900;PTN004629151;orthologs	U-BOX DOMAIN-CONTAINING PROTEIN 10 (PTHR23315:SF52)
POPTR_003G204300v3	Uncharacterized protein;POPTR_003G204300;PTN004647572;orthologs	RNA-BINDING (RRM/RBD/RNP MOTIFS) FAMILY PROTEIN-RELATED (PTHR24009:SF3)
POPTR_018G045100v3	HD-ZIP family protein;POPTR_018G045100;PTN008173860;orthologs	HOMEOBOX-LEUCINE ZIPPER PROTEIN ATHB-8 (PTHR45950:SF6)
POPTR_011G109700v3	Uncharacterized protein;POPTR_011G109700;PTN002414451;orthologs	PEPTIDE-N4-(N-ACETYL-BETA-GLUCOSAMINYL)ASPARAGINE AMIDASE A PROTEIN (PTHR31104:SF1)
POPTR_018G016300v3	Protein FAM33A;POPTR_018G016300;PTN002424386;orthologs	SPINDLE AND KINETOCHORE-ASSOCIATED PROTEIN 2 (PTHR32017:SF3)
POPTR_002G152200v3	TCP domain-containing protein;POPTR_002G152200;PTN002414096;orthologs	TCP DOMAIN-CONTAINING PROTEIN (PTHR31072:SF1)
POPTR_011G139400v3	Uncharacterized protein;POPTR_011G139400;PTN002132968;orthologs	OS07G0516400 PROTEIN (PTHR33647:SF5)
POPTR_004G093200v3	Uncharacterized protein;POPTR_004G093200;PTN002048712;orthologs	PROTEIN PIN-LIKES 2-LIKE (PTHR31419:SF8)
POPTR_001G116800v3	DNA photolyase;POPTR_001G116800;PTN002230612;orthologs	DNA PHOTOLYASE (PTHR10211:SF0)
POPTR_010G083600v3	Hcy-binding domain-containing protein;POPTR_010G083600;PTN001843970;orthologs	ZGC:172121 (PTHR46015:SF1)
POPTR_006G209200v3	NAC domain-containing protein;POPTR_006G209200;PTN002076720;orthologs	CONTAINING PROTEIN 90, PUTATIVE, EXPRESSED-RELATED (PTHR31989:SF33)
POPTR_001G037400v3	Uncharacterized protein;POPTR_001G037400;PTN004983798;orthologs	OS04G0658200 PROTEIN (PTHR33181:SF19)
POPTR_008G166700v3	Uncharacterized protein;POPTR_008G166700;PTN001638101;orthologs	TRANSCRIPTION FACTOR MYB4 (PTHR10641:SF541)
POPTR_006G027600v3	Uncharacterized protein;POPTR_006G027600;PTN002339641;orthologs	HISTONE-LYSINE N-METHYLTRANSFERASE, H3 LYSINE-9 SPECIFIC SUVH1 (PTHR45660:SF5)
POPTR_019G028800v3	Uncharacterized protein;POPTR_019G028800;PTN008589318;orthologs	CALCIUM-BINDING EF-HAND FAMILY PROTEIN (PTHR23064:SF70)
POPTR_016G109000v3	D-fructose-1,6-bisphosphate 1-phosphohydrolase;POPTR_016G109000;PTN007513759;orthologs	D-FRUCTOSE-1,6-BISPHOSPHATE 1-PHOSPHOHYDROLASE (PTHR11556:SF18)
POPTR_018G142100v3	CCT domain-containing protein;POPTR_018G142100;PTN004893634;orthologs	PROTEIN CHLOROPLAST IMPORT APPARATUS 2 (PTHR31874:SF10)
POPTR_001G184100v3	Uncharacterized protein;POPTR_001G184100;PTN008148768;orthologs	HOMEOBOX-LEUCINE ZIPPER PROTEIN GLABRA 2 (PTHR45654:SF24)
POPTR_010G173500v3	X8 domain-containing protein;POPTR_010G173500;PTN004932724;orthologs	CARBOHYDRATE-BINDING X8 DOMAIN SUPERFAMILY PROTEIN (PTHR31044:SF28)
POPTR_010G182800v3	PAM2 domain-containing protein;POPTR_010G182800;PTN002138501;orthologs	PROTEIN EARLY RESPONSIVE TO DEHYDRATION 15 (PTHR33790:SF1)
POPTR_006G007300v3	Uncharacterized protein;POPTR_006G007300;PTN002277479;orthologs	GLYCOSYLTRANSFERASE (PTHR48048:SF45)
POPTR_002G156000v3	Malic enzyme;POPTR_002G156000;PTN001916943;orthologs	NAD-DEPENDENT MALIC ENZYME 2, MITOCHONDRIAL (PTHR23406:SF73)
POPTR_010G100700v3	Uncharacterized protein;POPTR_010G100700;PTN004998821;orthologs	XRI1-LIKE PROTEIN (PTHR33385:SF18)
POPTR_016G016700v3	Uncharacterized protein;POPTR_016G016700;PTN002277483;orthologs	GLYCOSYLTRANSFERASE (PTHR48048:SF45)
POPTR_016G013000v3	Uncharacterized protein;POPTR_016G013000;;orthologs
POPTR_010G195800v3	Uncharacterized protein;POPTR_010G195800;PTN004996789;orthologs	H/ACA RIBONUCLEOPROTEIN COMPLEX NON-CORE SUBUNIT NAF1-LIKE (PTHR33356:SF17)
POPTR_007G085600v3	Uncharacterized protein;POPTR_007G085600;PTN001736549;orthologs	ALANINE--GLYOXYLATE AMINOTRANSFERASE 2, MITOCHONDRIAL (PTHR45688:SF3)
POPTR_010G025800v3	Receptor-like serine/threonine-protein kinase;POPTR_010G025800;PTN002406153;orthologs	RECEPTOR-LIKE SERINE/THREONINE-PROTEIN KINASE (PTHR27002:SF1039)
POPTR_018G030200v3	Abhydrolase_2 domain-containing protein;POPTR_018G030200;PTN001639434;orthologs	ALPHA/BETA-HYDROLASES SUPERFAMILY PROTEIN (PTHR46234:SF16)
POPTR_010G001000v3	Two-component response regulator;POPTR_010G001000;PTN008122942;orthologs	TWO-COMPONENT RESPONSE REGULATOR ARR2 (PTHR43874:SF67)
POPTR_001G048500v3	Protein kinase domain-containing protein;POPTR_001G048500;PTN008265512;orthologs	PROTEIN KINASE DOMAIN-CONTAINING PROTEIN (PTHR47989:SF27)
POPTR_002G010100v3	Uncharacterized protein;POPTR_002G010100;PTN001974451;orthologs	OS05G0345500 PROTEIN (PTHR47457:SF1)
POPTR_011G106400v3	Non-specific serine/threonine protein kinase;POPTR_011G106400;PTN007813908;orthologs	NON-SPECIFIC SERINE/THREONINE PROTEIN KINASE (PTHR48055:SF44)
POPTR_013G100800v3	PNP_UDP_1 domain-containing protein;POPTR_013G100800;PTN007688044;orthologs	PNP_UDP_1 DOMAIN-CONTAINING PROTEIN (PTHR21234:SF45)
POPTR_010G134100v3	Protein kinase domain-containing protein;POPTR_010G134100;PTN008264458;orthologs	PROTEIN KINASE DOMAIN-CONTAINING PROTEIN (PTHR47988:SF65)
POPTR_017G144700v3	UTP--glucose-1-phosphate uridylyltransferase;POPTR_017G144700;PTN002460653;orthologs	UTP--GLUCOSE-1-PHOSPHATE URIDYLYLTRANSFERASE (PTHR43511:SF4)
POPTR_012G048600v3	Mitogen-activated protein kinase;POPTR_012G048600;PTN007765725;orthologs	MITOGEN-ACTIVATED PROTEIN KINASE 9 (PTHR24055:SF429)
POPTR_010G029100v3	Glutamine synthetase;POPTR_010G029100;PTN001839218;orthologs	GLUTAMINE SYNTHETASE 2 CYTOPLASMIC (PTHR20852:SF57)
POPTR_003G059900v3	Uncharacterized protein;POPTR_003G059900;PTN002150430;orthologs	OS01G0104300 PROTEIN (PTHR34198:SF1)
POPTR_005G240900v3	Uncharacterized protein;POPTR_005G240900;PTN002413799;orthologs	PATHOGENESIS-RELATED THAUMATIN FAMILY PROTEIN (PTHR31048:SF3)
POPTR_008G050700v3	Uncharacterized protein;POPTR_008G050700;PTN008150724;orthologs	AQUAPORIN TIP1-3 (PTHR45665:SF21)
POPTR_004G190900v3	5-methyltetrahydropteroyltriglutamate--homocysteine S-methyltransferase;POPTR_004G190900;PTN002412282;orthologs	5-METHYLTETRAHYDROPTEROYLTRIGLUTAMATE--HOMOCYSTEINE METHYLTRANSFERASE 3, CHLOROPLASTIC (PTHR30519:SF25)
POPTR_008G151000v3	Phytocyanin domain-containing protein;POPTR_008G151000;PTN002093808;orthologs	OS07G0570600 PROTEIN (PTHR33021:SF339)
POPTR_002G155700v3	Uncharacterized protein;POPTR_002G155700;PTN005076113;orthologs	PROTEIN, PUTATIVE-RELATED (PTHR35410:SF2)
POPTR_010G200500v3	ATPase_AAA_core domain-containing protein;POPTR_010G200500;PTN002089553;orthologs	RIBULOSE BISPHOSPHATE CARBOXYLASE/OXYGENASE ACTIVASE, CHLOROPLASTIC (PTHR32429:SF32)
POPTR_017G084600v3	Dof-type domain-containing protein;POPTR_017G084600;PTN002029356;orthologs	CYCLIC DOF FACTOR 2 (PTHR31089:SF1)
POPTR_001G170700v3	DUF1296 domain-containing protein;POPTR_001G170700;PTN005331610;orthologs	OS06G0206100 PROTEIN (PTHR47070:SF2)
POPTR_014G103000v3	Homeobox domain-containing protein;POPTR_014G103000;PTN001965123;orthologs	HOMEOBOX-LEUCINE ZIPPER PROTEIN ATHB-7 (PTHR24326:SF604)
POPTR_006G135100v3	Pectinesterase;POPTR_006G135100;PTN002421293;orthologs	PECTINESTERASE/PECTINESTERASE INHIBITOR 54-RELATED (PTHR31707:SF11)
POPTR_013G151000v3	EF-hand domain-containing protein;POPTR_013G151000;PTN002249022;orthologs	EF-HAND DOMAIN-CONTAINING PROTEIN (PTHR47319:SF8)
POPTR_002G034000v3	PfkB domain-containing protein;POPTR_002G034000;PTN005156838;orthologs	OS01G0105900 PROTEIN (PTHR43320:SF1)
POPTR_004G138200v3	Uncharacterized protein;POPTR_004G138200;PTN005261548;orthologs	PATELLIN-3 (PTHR45932:SF26)
POPTR_015G096500v3	Uncharacterized protein;POPTR_015G096500;PTN005065404;orthologs	OS03G0310200 PROTEIN (PTHR34946:SF2)
POPTR_009G109300v3	Uncharacterized protein;POPTR_009G109300;PTN002191678;orthologs	EXPRESSED PROTEIN (PTHR36346:SF2)
POPTR_001G298300v3	Uncharacterized protein;POPTR_001G298300;PTN004896336;orthologs	GH3 DOMAIN-CONTAINING PROTEIN (PTHR31901:SF9)
POPTR_014G115200v3	Uncharacterized protein;POPTR_014G115200;PTN004344841;orthologs	PROTEIN ROLLING PROTEIN (PTHR12242:SF6)
POPTR_012G078300v3	Uncharacterized protein;POPTR_012G078300;PTN001792091;orthologs	NHL DOMAIN PROTEIN (PTHR47076:SF9)
POPTR_013G086500v3	Uncharacterized protein;POPTR_013G086500;PTN002030508;orthologs	TYROSINE-PROTEIN PHOSPHATASE DSP5 (PTHR31126:SF46)
POPTR_008G192300v3	Uncharacterized protein;POPTR_008G192300;PTN004900247;orthologs	DUF936 FAMILY PROTEIN (PTHR31928:SF6)
POPTR_002G079500v3	Aa_trans domain-containing protein;POPTR_002G079500;PTN002342751;orthologs	AMINO ACID PERMEASE 3 (PTHR48017:SF64)
POPTR_008G069000v3	Protein kinase domain-containing protein;POPTR_008G069000;PTN007767500;orthologs	HYPOTHETICAL SER-THR PROTEIN KINASE (PTHR24058:SF113)
POPTR_002G101500v3	Uncharacterized protein;POPTR_002G101500;PTN008014022;orthologs	PHAGE CAPSID SCAFFOLDING PROTEIN (GPO) SERINE PEPTIDASE (PTHR33735:SF14)
POPTR_004G151200v3	PPPDE domain-containing protein;POPTR_004G151200;PTN001750164;orthologs	IP06716P-RELATED (PTHR12378:SF80)
POPTR_004G061700v3	AAA domain-containing protein;POPTR_004G061700;PTN004287361;orthologs	PROTEIN STICHEL-LIKE 3 (PTHR11669:SF46)
POPTR_004G197900v3	Uncharacterized protein;POPTR_004G197900;PTN004613645;orthologs	NB-ARC DOMAIN-CONTAINING PROTEIN (PTHR23155:SF1139)
POPTR_016G004800v3	Uncharacterized protein;POPTR_016G004800;PTN007704295;orthologs	OS08G0492000 PROTEIN (PTHR22601:SF69)
POPTR_002G092100v3	Peptidase A1 domain-containing protein;POPTR_002G092100;PTN007620314;orthologs	PEPTIDASE A1 DOMAIN-CONTAINING PROTEIN (PTHR13683:SF339)
POPTR_001G355100v3	Fe2OG dioxygenase domain-containing protein;POPTR_001G355100;PTN004136971;orthologs	FE2OG DIOXYGENASE DOMAIN-CONTAINING PROTEIN (PTHR47991:SF184)
POPTR_009G055800v3	Uncharacterized protein;POPTR_009G055800;PTN002418645;orthologs	PROTEIN BPS1, CHLOROPLASTIC-LIKE (PTHR31509:SF13)
POPTR_009G167800v3	Uncharacterized protein;POPTR_009G167800;PTN002416131;orthologs	PROTEIN EXORDIUM-LIKE 5 (PTHR31279:SF4)
POPTR_002G012000v3	AAA domain-containing protein;POPTR_002G012000;PTN001892301;orthologs	ATP-DEPENDENT ZINC METALLOPROTEASE FTSH 1, CHLOROPLASTIC-RELATED (PTHR23076:SF113)
POPTR_004G214700v3	HMA domain-containing protein;POPTR_004G214700;PTN001868207;orthologs	HEAVY METAL-ASSOCIATED ISOPRENYLATED PLANT PROTEIN 3 (PTHR46413:SF2)
POPTR_010G109600v3	H15 domain-containing protein;POPTR_010G109600;PTN001689994;orthologs	HMG-Y-RELATED PROTEIN A (PTHR11467:SF103)
POPTR_013G017300v3	Uncharacterized protein;POPTR_013G017300;PTN002136314;orthologs	REF/SRPP-LIKE PROTEIN OS05G0151300/LOC_OS05G05940 (PTHR33732:SF9)
POPTR_006G067100v3	Uncharacterized protein;POPTR_006G067100;PTN005073693;orthologs	COACTIVATOR CBP, KIX DOMAIN-CONTAINING PROTEIN-RELATED (PTHR35300:SF4)
POPTR_004G197400v3	Uncharacterized protein;POPTR_004G197400;PTN002117580;orthologs	PROTEIN ETHYLENE INSENSITIVE 3 (PTHR33305:SF11)
POPTR_006G134600v3	Pectinesterase;POPTR_006G134600;PTN002062715;orthologs	PECTINESTERASE/PECTINESTERASE INHIBITOR 12-RELATED (PTHR31707:SF156)
POPTR_003G205800v3	Protein kinase domain-containing protein;POPTR_003G205800;PTN005218276;orthologs	SERINE/THREONINE-PROTEIN KINASE UCNL (PTHR45637:SF3)
POPTR_001G128600v3	Uncharacterized protein;POPTR_001G128600;PTN002181760;orthologs	F26F24.11 (PTHR35692:SF1)
POPTR_001G100800v3	Homeobox domain-containing protein;POPTR_001G100800;PTN007543711;orthologs	HOMEOBOX DOMAIN-CONTAINING PROTEIN (PTHR11850:SF370)
POPTR_006G263600v3	WRKY domain-containing protein;POPTR_006G263600;PTN002049111;orthologs	WRKY FAMILY TRANSCRIPTION FACTOR (PTHR31429:SF76)
POPTR_006G128900v3	FAD-binding PCMH-type domain-containing protein;POPTR_006G128900;PTN002089972;orthologs	BERBERINE BRIDGE ENZYME-LIKE 26 (PTHR32448:SF35)
POPTR_014G089600v3	Uncharacterized protein;POPTR_014G089600;PTN001662170;orthologs	OS08G0151600 PROTEIN (PTHR42938:SF19)
POPTR_005G059900v3	Aminotran_5 domain-containing protein;POPTR_005G059900;PTN005171372;orthologs	CYSTEINE DESULFURASE 1, CHLOROPLASTIC (PTHR43586:SF8)
POPTR_006G127800v3	Uncharacterized protein;POPTR_006G127800;PTN002202363;orthologs	ACYL-COA-BINDING DOMAIN PROTEIN (PTHR37215:SF1)
POPTR_010G241700v3	Uncharacterized protein;POPTR_010G241700;PTN002151077;orthologs	NUCLEAR TRANSPORT FACTOR 2 (NTF2) FAMILY PROTEIN (PTHR34213:SF2)
POPTR_004G213400v3	Uncharacterized protein;POPTR_004G213400;PTN005217203;orthologs	CHAPERONIN 60 SUBUNIT ALPHA 1, CHLOROPLASTIC (PTHR45633:SF18)
POPTR_006G190200v3	Protein kinase domain-containing protein;POPTR_006G190200;PTN004131476;orthologs	KINASE SUPERFAMILY WITH OCTICOSAPEPTIDE/PHOX/BEM1P DOMAIN-CONTAINING PROTEIN (PTHR23257:SF797)
POPTR_013G013900v3	Bidirectional sugar transporter SWEET;POPTR_013G013900;PTN007462163;orthologs	BIDIRECTIONAL SUGAR TRANSPORTER SWEET16 (PTHR10791:SF142)
POPTR_018G114600v3	Uncharacterized protein;POPTR_018G114600;PTN002205076;orthologs	OS09G0556800 PROTEIN (PTHR37392:SF1)
POPTR_016G080200v3	Uncharacterized protein;POPTR_016G080200;PTN002331120;orthologs	AFADIN (PTHR46836:SF8)
POPTR_006G141100v3	G protein gamma domain-containing protein;POPTR_006G141100;PTN007957407;orthologs	GUANINE NUCLEOTIDE-BINDING PROTEIN SUBUNIT GAMMA 3 (PTHR32378:SF10)
POPTR_014G121000v3	DNA replication licensing factor MCM7;MCM7;PTN001701218;orthologs	DNA REPLICATION LICENSING FACTOR MCM7 (PTHR11630:SF26)
POPTR_004G019900v3	TPT domain-containing protein;POPTR_004G019900;PTN002255488;orthologs	GLUCOSE-6-PHOSPHATE/PHOSPHATE TRANSLOCATOR 1, CHLOROPLASTIC (PTHR11132:SF491)
POPTR_010G152900v3	Uncharacterized protein;POPTR_010G152900;PTN002433281;orthologs	WALL-ASSOCIATED RECEPTOR KINASE CARBOXY-TERMINAL PROTEIN (PTHR33355:SF12)
POPTR_013G045800v3	ASCH domain-containing protein;POPTR_013G045800;PTN007598383;orthologs	EXPRESSED PROTEIN (PTHR12963:SF0)
POPTR_002G260100v3	Protein kinase domain-containing protein;POPTR_002G260100;PTN005391834;orthologs	RECEPTOR LIKE PROTEIN 29 (PTHR27000:SF768)
POPTR_004G015500v3	Uncharacterized protein;POPTR_004G015500;PTN002390024;orthologs	CALCIUM-DEPENDENT PROTEIN KINASE 21-LIKE (PTHR24349:SF510)
POPTR_016G051600v3	Protein kinase domain-containing protein;POPTR_016G051600;PTN001987291;orthologs	OS04G0472500 PROTEIN (PTHR27000:SF146)
POPTR_014G047400v3	Uncharacterized protein;POPTR_014G047400;PTN004542406;orthologs	BZIP DOMAIN CLASS TRANSCRIPTION FACTOR (DUF630 AND DUF632)-RELATED (PTHR21450:SF9)
POPTR_009G132100v3	Aa_trans domain-containing protein;POPTR_009G132100;PTN001881506;orthologs	AUXIN TRANSPORTER-LIKE PROTEIN 2 (PTHR48017:SF65)
POPTR_013G002200v3	Uncharacterized protein;POPTR_013G002200;PTN004429613;orthologs	OS01G0290000 PROTEIN (PTHR47966:SF28)
POPTR_009G027300v3	Uncharacterized protein;POPTR_009G027300;PTN002240032;orthologs	TRANSCRIPTION FACTOR MYB48 (PTHR45675:SF7)
POPTR_001G352500v3	Uncharacterized protein;POPTR_001G352500;PTN001662806;orthologs	TWO-PORE POTASSIUM CHANNEL 3 (PTHR11003:SF282)
POPTR_001G043100v3	J domain-containing protein;POPTR_001G043100;PTN004665932;orthologs	CHAPERONE PROTEIN DNAJ 8, CHLOROPLASTIC (PTHR24074:SF35)
POPTR_004G147800v3	Non-specific serine/threonine protein kinase;POPTR_004G147800;PTN004236178;orthologs	SERINE/THREONINE-PROTEIN KINASE SMG1 (PTHR11139:SF71)
POPTR_014G006900v3	Phytosulfokine-beta;POPTR_014G006900;PTN002116638;orthologs	PHYTOSULFOKINES 3 (PTHR33285:SF55)
POPTR_003G084200v3	Uncharacterized protein;POPTR_003G084200;PTN001664119;orthologs	TMV RESISTANCE PROTEIN N-LIKE (PTHR11017:SF532)
POPTR_015G099100v3	Uncharacterized protein;POPTR_015G099100;PTN008658512;orthologs	SUPPRESSOR SRP40-LIKE PROTEIN (PTHR33673:SF3)
POPTR_015G055000v3	TLC domain-containing protein;POPTR_015G055000;PTN007581180;orthologs	LAG1 LONGEVITY ASSURANCE HOMOLOG 3-LIKE (PTHR12560:SF57)
POPTR_002G161900v3	RING-type domain-containing protein;POPTR_002G161900;PTN002305700;orthologs	BRASSINOSTEROID-RESPONSIVE RING PROTEIN 1-RELATED (PTHR45969:SF10)
POPTR_002G203500v3	Uncharacterized protein;POPTR_002G203500;PTN005009110;orthologs	PROTEIN SENESCENCE-ASSOCIATED GENE 21, MITOCHONDRIAL (PTHR33509:SF5)
POPTR_001G006700v3	Uncharacterized protein;POPTR_001G006700;PTN005201714;orthologs	ACYL-ACTIVATING ENZYME 18, PEROXISOMAL-RELATED (PTHR44378:SF1)
POPTR_012G084400v3	Amine oxidase;POPTR_012G084400;PTN001636844;orthologs	AMINE OXIDASE (PTHR10638:SF18)
POPTR_007G091900v3	Uncharacterized protein;POPTR_007G091900;PTN005074451;orthologs	CELL WALL INTEGRITY/STRESS RESPONSE COMPONENT-LIKE PROTEIN (PTHR35310:SF1)
POPTR_013G044900v3	Uncharacterized protein;POPTR_013G044900;PTN002174837;orthologs	RUBISCO ACCUMULATION FACTOR 1.2, CHLOROPLASTIC (PTHR35299:SF3)
POPTR_001G086000v3	BHLH domain-containing protein;POPTR_001G086000;PTN002303264;orthologs	TRANSCRIPTION FACTOR BHLH157 (PTHR46196:SF2)
POPTR_007G003200v3	HTH myb-type domain-containing protein;POPTR_007G003200;PTN004802510;orthologs	MYB FAMILY TRANSCRIPTION FACTOR PHL6 (PTHR31314:SF8)
POPTR_013G148000v3	Uncharacterized protein;POPTR_013G148000;PTN002429946;orthologs	SUBFAMILY NOT NAMED (PTHR33090:SF96)
POPTR_001G145200v3	Uncharacterized protein;POPTR_001G145200;PTN001703563;orthologs	PROTEIN NRT1/ PTR FAMILY 7.3 (PTHR11654:SF90)
POPTR_003G173900v3	Uncharacterized protein;POPTR_003G173900;PTN005217375;orthologs	60 KDA HEAT SHOCK PROTEIN, MITOCHONDRIAL (PTHR45633:SF3)
POPTR_011G102100v3	SH2 domain-containing protein;POPTR_011G102100;PTN007538629;orthologs	SIGNAL TRANSDUCER AND TRANSCRIPTION ACTIVATOR (PTHR11801:SF43)
POPTR_001G192800v3	Uncharacterized protein;POPTR_001G192800;PTN002129681;orthologs	PROTEIN, PUTATIVE-RELATED (PTHR33564:SF15)
POPTR_014G106500v3	Uncharacterized protein;POPTR_014G106500;PTN001714517;orthologs	ACETYLSEROTONIN O-METHYLTRANSFERASE (PTHR11746:SF303)
POPTR_019G119200v3	Receptor-like serine/threonine-protein kinase;POPTR_019G119200;PTN001991493;orthologs	RECEPTOR-LIKE SERINE/THREONINE-PROTEIN KINASE (PTHR47975:SF33)
POPTR_006G020900v3	Uncharacterized protein;POPTR_006G020900;PTN001736584;orthologs	ADENOSYLMETHIONINE-8-AMINO-7-OXONONANOATE AMINOTRANSFERASE (PTHR42684:SF3)
POPTR_002G053100v3	Uncharacterized protein;POPTR_002G053100;PTN004747875;orthologs	OS04G0228100 PROTEIN (PTHR31016:SF2)
POPTR_018G135600v3	NB-ARC domain-containing protein;POPTR_018G135600;PTN004613392;orthologs	DISEASE RESISTANCE PROTEIN RFL1-RELATED (PTHR23155:SF1032)
POPTR_014G108200v3	Endo/exonuclease/phosphatase domain-containing protein;POPTR_014G108200;PTN002281288;orthologs	EF-HAND DOMAIN-CONTAINING PROTEIN (PTHR12121:SF50)
POPTR_006G015200v3	MFS domain-containing protein;POPTR_006G015200;PTN001920515;orthologs	MFS DOMAIN-CONTAINING PROTEIN (PTHR48020:SF30)
POPTR_002G213200v3	Uncharacterized protein;POPTR_002G213200;PTN004674343;orthologs	PROTEIN VAPYRIN-LIKE (PTHR24123:SF126)
POPTR_015G007900v3	Uncharacterized protein;POPTR_015G007900;PTN001677601;orthologs	METAL-DEPENDENT PROTEIN HYDROLASE (PTHR11215:SF3)
POPTR_003G071000v3	Auxin-responsive family protein;POPTR_003G071000;PTN002045223;orthologs	AUXIN-RESPONSIVE PROTEIN SAUR77 (PTHR31374:SF5)
POPTR_015G126800v3	Uncharacterized protein;POPTR_015G126800;PTN002118390;orthologs	BAG FAMILY MOLECULAR CHAPERONE REGULATOR 7 (PTHR33322:SF3)
POPTR_012G035700v3	Uncharacterized protein;POPTR_012G035700;PTN002142845;orthologs	MEMBRANE-ASSOCIATED KINASE REGULATOR 5 (PTHR33929:SF4)
POPTR_001G334800v3	Uncharacterized protein;POPTR_001G334800;PTN005320045;orthologs	OS04G0487100 PROTEIN (PTHR46773:SF3)
POPTR_011G032600v3	Uncharacterized protein;POPTR_011G032600;PTN002060338;orthologs	PROTEIN, PUTATIVE-RELATED (PTHR31676:SF28)
POPTR_008G074100v3	Lipoyl-binding domain-containing protein;POPTR_008G074100;PTN005351226;orthologs	LIPOYL-BINDING DOMAIN-CONTAINING PROTEIN (PTHR47597:SF2)
POPTR_006G204700v3	Peptidase A1 domain-containing protein;POPTR_006G204700;PTN001785199;orthologs	PEPTIDASE A1 DOMAIN-CONTAINING PROTEIN (PTHR13683:SF710)
POPTR_006G236200v3	Auxin-responsive protein;POPTR_006G236200;PTN004873240;orthologs	AUXIN-RESPONSIVE PROTEIN IAA28 (PTHR31734:SF134)
POPTR_013G135600v3	AP2/ERF domain-containing protein;POPTR_013G135600;PTN002420339;orthologs	ETHYLENE-RESPONSIVE TRANSCRIPTION FACTOR ERF053 (PTHR31657:SF19)
POPTR_014G151800v3	Uncharacterized protein;POPTR_014G151800;PTN004457482;orthologs	SOLUTE CARRIER FAMILY 35 PROTEIN (DUF914) (PTHR14233:SF4)
POPTR_016G113300v3	Uncharacterized protein;POPTR_016G113300;PTN005234273;orthologs	AQUAPORIN PIP1.1 (PTHR45687:SF74)
POPTR_006G124800v3	Uncharacterized protein;POPTR_006G124800;PTN005303800;orthologs	HEAVY METAL-ASSOCIATED ISOPRENYLATED PLANT PROTEIN 6 (PTHR46413:SF1)
POPTR_005G032300v3	Nicotinamide-nucleotide adenylyltransferase;POPTR_005G032300;PTN001738767;orthologs	NICOTINAMIDE-NUCLEOTIDE ADENYLYLTRANSFERASE (PTHR12039:SF0)
POPTR_007G044800v3	Protein kinase domain-containing protein;POPTR_007G044800;PTN002391148;orthologs	MITOGEN-ACTIVATED PROTEIN KINASE KINASE KINASE 19-RELATED (PTHR48011:SF18)
POPTR_017G039100v3	Midasin;POPTR_017G039100;PTN004580097;orthologs	MIDASIN (PTHR48103:SF2)
POPTR_007G130100v3	Uncharacterized protein;POPTR_007G130100;PTN007921037;orthologs	B-BOX ZINC FINGER PROTEIN 24 (PTHR31832:SF41)
POPTR_006G110000v3	Protein kinase domain-containing protein;POPTR_006G110000;PTN007808355;orthologs	PROTEIN KINASE DOMAIN-CONTAINING PROTEIN (PTHR27003:SF451)
POPTR_008G052100v3	ADF-H domain-containing protein;POPTR_008G052100;PTN002276317;orthologs	ADF-H DOMAIN-CONTAINING PROTEIN (PTHR11913:SF59)
POPTR_002G242500v3	Cytochrome b5 heme-binding domain-containing protein;POPTR_002G242500;PTN001833348;orthologs	CYTOCHROME B5 HEME-BINDING DOMAIN-CONTAINING PROTEIN (PTHR19359:SF137)
POPTR_010G164400v3	Uncharacterized protein;POPTR_010G164400;PTN002444142;orthologs	PLANT/PROTEIN (PTHR37178:SF1)
POPTR_001G403700v3	Uncharacterized protein;POPTR_001G403700;PTN002025110;orthologs	COP1-INTERACTING PROTEIN 7 (PTHR31008:SF4)
POPTR_012G070900v3	HD-ZIP family protein;POPTR_012G070900;PTN002388474;orthologs	HOMEOBOX-LEUCINE ZIPPER PROTEIN ATHB-54 (PTHR24326:SF606)
POPTR_017G050800v3	TOG domain-containing protein;POPTR_017G050800;PTN001739878;orthologs	SPLICING FACTOR 3B SUBUNIT 1 (PTHR12097:SF0)
POPTR_001G115600v3	Uncharacterized protein;POPTR_001G115600;PTN002029560;orthologs	ACT DOMAIN-CONTAINING PROTEIN ACR8 (PTHR31096:SF6)
POPTR_002G140500v3	RING-type domain-containing protein;POPTR_002G140500;PTN008227759;orthologs	RING-TYPE DOMAIN-CONTAINING PROTEIN (PTHR47168:SF3)
POPTR_018G115400v3	Ribosomal_S17_N domain-containing protein;POPTR_018G115400;PTN001644144;orthologs	40S RIBOSOMAL PROTEIN S11-1-RELATED (PTHR10744:SF47)
POPTR_015G131800v3	Uncharacterized protein;POPTR_015G131800;PTN002044971;orthologs	SIMILARITY TO UNKNOWN PROTEIN (PTHR31371:SF14)
POPTR_005G098100v3	Tr-type G domain-containing protein;POPTR_005G098100;PTN001897057;orthologs	EUKARYOTIC TRANSLATION ELONGATION FACTOR 2 (PTHR42908:SF10)
POPTR_010G093000v3	Uncharacterized protein;POPTR_010G093000;PTN008137729;orthologs	TRANSCRIPTION FACTOR MYB124 (PTHR45614:SF76)
POPTR_013G046100v3	Protein kinase domain-containing protein;POPTR_013G046100;PTN001967611;orthologs	PHOSPHOENOLPYRUVATE CARBOXYLASE KINASE 2 (PTHR24349:SF414)
POPTR_005G181400v3	B-like cyclin;POPTR_005G181400;PTN001608057;orthologs	G2/MITOTIC-SPECIFIC CYCLIN-A (PTHR10177:SF583)
POPTR_008G159100v3	Calcium-transporting ATPase;POPTR_008G159100;PTN001943998;orthologs	CALCIUM-TRANSPORTING ATPASE 13, PLASMA MEMBRANE-TYPE-RELATED (PTHR24093:SF434)
POPTR_019G057800v3	Chalcone-flavonone isomerase family protein;POPTR_019G057800;PTN001998096;orthologs	CHALCONE--FLAVANONE ISOMERASE 3-RELATED (PTHR47588:SF1)
POPTR_004G156200v3	Usp domain-containing protein;POPTR_004G156200;PTN008238000;orthologs	ADENINE NUCLEOTIDE ALPHA HYDROLASES-LIKE SUPERFAMILY PROTEIN (PTHR47583:SF1)
POPTR_005G063400v3	Uncharacterized protein;POPTR_005G063400;PTN002416973;orthologs	PECTIN LYASE-LIKE SUPERFAMILY PROTEIN (PTHR31339:SF4)
POPTR_014G014500v3	Uncharacterized protein;POPTR_014G014500;PTN002128278;orthologs	BNAC08G42370D PROTEIN (PTHR33526:SF13)
POPTR_005G253800v3	Glutamate receptor;POPTR_005G253800;PTN001826653;orthologs	GLUTAMATE RECEPTOR 1-RELATED (PTHR18966:SF422)
POPTR_010G187800v3	Uncharacterized protein;POPTR_010G187800;PTN002425318;orthologs	TEMPERATURE-SENSITIVE SN-2 ACYL-LIPID OMEGA-3 DESATURASE (FERREDOXIN), CHLOROPLASTIC (PTHR32100:SF52)
POPTR_016G024400v3	MFS domain-containing protein;POPTR_016G024400;PTN007759544;orthologs	MFS DOMAIN-CONTAINING PROTEIN (PTHR23504:SF15)
POPTR_002G133500v3	SAP30_Sin3_bdg domain-containing protein;POPTR_002G133500;PTN002297074;orthologs	HISTONE DEACETYLASE COMPLEX SUBUNIT (PTHR13286:SF6)
POPTR_001G018200v3	Uncharacterized protein;POPTR_001G018200;PTN002031338;orthologs	PROLINE-TRNA LIGASE (DUF1680) (PTHR31151:SF0)
POPTR_008G051600v3	Oxoglutarate dehydrogenase (succinyl-transferring);POPTR_008G051600;PTN002351794;orthologs	2-OXOGLUTARATE DEHYDROGENASE E1 COMPONENT DHKTD1, MITOCHONDRIAL-RELATED (PTHR23152:SF4)
POPTR_017G090100v3	Uncharacterized protein;POPTR_017G090100;PTN002139844;orthologs	LYSINE-TRNA LIGASE (PTHR33835:SF2)
POPTR_008G159300v3	Uncharacterized protein;POPTR_008G159300;PTN001889547;orthologs	CALMODULIN-LIKE PROTEIN 8 (PTHR23050:SF453)
POPTR_015G060000v3	COBRA-like protein;POPTR_015G060000;PTN002059918;orthologs	PROTEIN COBRA (PTHR31673:SF61)
POPTR_005G022600v3	Uncharacterized protein;POPTR_005G022600;PTN002546385;orthologs	F-BOX/LRR-REPEAT PROTEIN 14 (PTHR13318:SF190)
POPTR_007G024000v3	Uncharacterized protein;POPTR_007G024000;PTN008233185;orthologs	LATE EMBRYOGENESIS ABUNDANT (LEA) PROTEIN-RELATED (PTHR47372:SF33)
POPTR_009G081600v3	Malate dehydrogenase;POPTR_009G081600;PTN001694234;orthologs	MALATE DEHYDROGENASE 2, PEROXISOMAL (PTHR11540:SF52)
POPTR_006G130200v3	S1Fa-like family protein;POPTR_006G130200;PTN002174813;orthologs	DNA-BINDING PROTEIN S1FA1-RELATED (PTHR35298:SF11)
POPTR_017G063500v3	Glycerophosphodiester phosphodiesterase;POPTR_017G063500;PTN001884088;orthologs	GLYCEROPHOSPHOCHOLINE PHOSPHODIESTERASE GPCPD1 (PTHR22958:SF1)
POPTR_002G020900v3	Signal recognition particle receptor subunit beta;POPTR_002G020900;PTN004264450;orthologs	SIGNAL RECOGNITION PARTICLE RECEPTOR SUBUNIT BETA (PTHR11485:SF34)
POPTR_005G071900v3	HD-ZIP family protein;POPTR_005G071900;PTN002388386;orthologs	HOMEOBOX-LEUCINE ZIPPER PROTEIN ATHB-6 (PTHR24326:SF547)
POPTR_019G035600v3	Uncharacterized protein;POPTR_019G035600;PTN002132914;orthologs	F20H23.8 PROTEIN (PTHR33646:SF2)
POPTR_010G244900v3	Uncharacterized protein;POPTR_010G244900;PTN007962985;orthologs	FASCICLIN-LIKE ARABINOGALACTAN PROTEIN 17 (PTHR32499:SF5)
POPTR_007G070900v3	NF-YC family protein;POPTR_007G070900;PTN002231382;orthologs	NUCLEAR TRANSCRIPTION FACTOR Y SUBUNIT GAMMA (PTHR10252:SF8)
POPTR_001G358600v3	Remorin_C domain-containing protein;POPTR_001G358600;PTN002050431;orthologs	REMORIN FAMILY PROTEIN (PTHR31471:SF49)
POPTR_006G008500v3	AAI domain-containing protein;POPTR_006G008500;PTN004871815;orthologs	BIFUNCTIONAL INHIBITOR/LIPID-TRANSFER PROTEIN/SEED STORAGE 2S ALBUMIN SUPERFAMILY PROTEIN (PTHR31731:SF16)
POPTR_003G119700v3	Uncharacterized protein;POPTR_003G119700;PTN001734067;orthologs	AGAMOUS-LIKE MADS-BOX PROTEIN AGL19 (PTHR11945:SF766)
POPTR_013G102700v3	Oxidored_FMN domain-containing protein;POPTR_013G102700;PTN002339798;orthologs	12-OXOPHYTODIENOATE REDUCTASE 1-RELATED (PTHR22893:SF110)
POPTR_012G131000v3	RNA helicase;POPTR_012G131000;PTN004650627;orthologs	RNA HELICASE (PTHR47958:SF24)
POPTR_006G025800v3	BZIP domain-containing protein;POPTR_006G025800;PTN001882468;orthologs	ABSCISIC ACID-INSENSITIVE 5-LIKE PROTEIN 2 (PTHR22952:SF466)
POPTR_002G193400v3	Uncharacterized protein;POPTR_002G193400;;orthologs
POPTR_008G101500v3	Alkaline/neutral invertase;POPTR_008G101500;PTN004898170;orthologs	ALKALINE/NEUTRAL INVERTASE C, MITOCHONDRIAL (PTHR31916:SF49)
POPTR_002G165000v3	WHy domain-containing protein;POPTR_002G165000;PTN002050105;orthologs	DESICCATION-RELATED PROTEIN LEA14-RELATED (PTHR31459:SF19)
POPTR_002G065600v3	AP2/ERF domain-containing protein;POPTR_002G065600;PTN002033596;orthologs	ETHYLENE-RESPONSIVE TRANSCRIPTION FACTOR ERF110 (PTHR31190:SF421)
POPTR_008G186800v3	Nucleotid_trans domain-containing protein;POPTR_008G186800;PTN005347219;orthologs	BETA-ARABINOFURANOSYLTRANSFERASE RAY1 (PTHR47483:SF1)
POPTR_017G116100v3	Uncharacterized protein;POPTR_017G116100;PTN005116626;orthologs	HOMEOBOX HOX-B3-LIKE PROTEIN (PTHR37708:SF2)
POPTR_001G118300v3	Amine oxidase;POPTR_001G118300;PTN002239841;orthologs	AMINE OXIDASE (PTHR10638:SF41)
POPTR_004G007400v3	GUB_WAK_bind domain-containing protein;POPTR_004G007400;PTN002433276;orthologs	F12F1.23 PROTEIN (PTHR33355:SF5)
POPTR_001G228000v3	HIT-type domain-containing protein;POPTR_001G228000;PTN001782069;orthologs	BOX C/D SNORNA PROTEIN 1 (PTHR13483:SF3)
POPTR_004G091000v3	Uncharacterized protein;POPTR_004G091000;PTN004255377;orthologs	5-OXOPROLINASE (PTHR11365:SF2)
POPTR_005G055300v3	WRKY family protein;POPTR_005G055300;PTN002040161;orthologs	WRKY DOMAIN-CONTAINING PROTEIN (PTHR31282:SF80)
POPTR_002G256100v3	Uncharacterized protein;POPTR_002G256100;;orthologs
POPTR_002G226800v3	Uncharacterized protein;POPTR_002G226800;PTN004398710;orthologs	RE44586P (PTHR13018:SF5)
POPTR_008G171700v3	Uncharacterized protein;POPTR_008G171700;PTN007942064;orthologs	PLASMODESMATA-LOCATED PROTEIN 2 (PTHR32080:SF24)
POPTR_002G179800v3	Uncharacterized protein;POPTR_002G179800;PTN008123615;orthologs	TWO-COMPONENT RESPONSE REGULATOR-LIKE APRR9 (PTHR43874:SF146)
POPTR_010G153000v3	Kinesin motor domain-containing protein;POPTR_010G153000;PTN002380445;orthologs	KINESIN-LIKE PROTEIN KIN-12C (PTHR37739:SF18)
POPTR_017G143700v3	Uncharacterized protein;POPTR_017G143700;PTN004613605;orthologs	NB-ARC DOMAIN CONTAINING PROTEIN, EXPRESSED (PTHR23155:SF1221)
POPTR_013G006600v3	Alkaline/neutral invertase;POPTR_013G006600;PTN004898132;orthologs	ALKALINE/NEUTRAL INVERTASE A, MITOCHONDRIAL (PTHR31916:SF46)
POPTR_002G151700v3	Uncharacterized protein;POPTR_002G151700;PTN004326238;orthologs	AGAMOUS-LIKE MADS-BOX PROTEIN AGL19 (PTHR11945:SF766)
POPTR_003G218400v3	F-box domain-containing protein;POPTR_003G218400;PTN001974062;orthologs	F-BOX DOMAIN-CONTAINING PROTEIN (PTHR46407:SF6)
POPTR_009G115500v3	C-CAP/cofactor C-like domain-containing protein;POPTR_009G115500;PTN007452945;orthologs	ADENYLYL CYCLASE-ASSOCIATED PROTEIN (PTHR10652:SF0)
POPTR_013G076400v3	Uncharacterized protein;POPTR_013G076400;PTN001801185;orthologs	DNA POLYMERASE DELTA SUBUNIT 4 (PTHR14303:SF0)
POPTR_010G093400v3	Homeobox domain-containing protein;POPTR_010G093400;PTN002388373;orthologs	HOMEOBOX-LEUCINE ZIPPER PROTEIN ATHB-13 (PTHR24326:SF176)
POPTR_013G006100v3	Epimerase domain-containing protein;POPTR_013G006100;PTN001623057;orthologs	UDP-GLUCOSE 4-EPIMERASE (PTHR43725:SF8)
POPTR_010G136800v3	HATPase_c domain-containing protein;POPTR_010G136800;PTN001693384;orthologs	HEAT SHOCK PROTEIN 90-5, CHLOROPLASTIC (PTHR11528:SF54)
POPTR_004G018500v3	Protein kinase domain-containing protein;POPTR_004G018500;PTN005389286;orthologs	PROTEIN KINASE SUPERFAMILY PROTEIN (PTHR47985:SF37)
POPTR_008G197400v3	Uncharacterized protein;POPTR_008G197400;PTN002284999;orthologs	INOSINE-URIDINE PREFERRING NUCLEOSIDE HYDROLASE FAMILY PROTEIN (PTHR46692:SF1)
POPTR_006G202600v3	RING-type E3 ubiquitin transferase;POPTR_006G202600;PTN001872346;orthologs	E3 UBIQUITIN-PROTEIN LIGASE PUB23 (PTHR22849:SF132)
POPTR_017G046200v3	Lipoxygenase;POPTR_017G046200;PTN002272631;orthologs	LINOLEATE 13S-LIPOXYGENASE 2-1, RELATED PROTEIN (PTHR11771:SF187)
POPTR_003G140600v3	Nucleoside diphosphate kinase;POPTR_003G140600;PTN001683251;orthologs	NUCLEOSIDE DIPHOSPHATE KINASE III, CHLOROPLASTIC/MITOCHONDRIAL (PTHR11349:SF101)
POPTR_012G047800v3	Uncharacterized protein;POPTR_012G047800;PTN004751789;orthologs	THAUMATIN-LIKE PROTEIN (PTHR31048:SF48)
POPTR_006G051000v3	Uncharacterized protein;POPTR_006G051000;PTN002044813;orthologs	GLYCOSYLTRANSFERASE STELLO1-RELATED (PTHR31362:SF0)
POPTR_001G166200v3	Tify domain-containing protein;POPTR_001G166200;PTN002101011;orthologs	PROTEIN TIFY 11A (PTHR33077:SF52)
POPTR_006G115100v3	1,4-alpha-glucan branching enzyme;POPTR_006G115100;PTN008115389;orthologs	1,4-ALPHA-GLUCAN-BRANCHING ENZYME (PTHR43651:SF3)
POPTR_013G048900v3	WD_REPEATS_REGION domain-containing protein;POPTR_013G048900;PTN001837252;orthologs	WD REPEAT-CONTAINING PROTEIN 55 HOMOLOG (PTHR19918:SF8)
POPTR_016G029100v3	Uncharacterized protein;POPTR_016G029100;PTN005026208;orthologs	HYDROXYPROLINE-RICH GLYCOPROTEIN FAMILY PROTEIN (PTHR33826:SF2)
POPTR_008G014300v3	Protein kinase domain-containing protein;POPTR_008G014300;PTN001992196;orthologs	LRR RECEPTOR-LIKE KINASE (PTHR27003:SF463)
POPTR_014G024400v3	Protein kinase domain-containing protein;POPTR_014G024400;PTN004731147;orthologs	LEUCINE-RICH REPEAT PROTEIN KINASE FAMILY PROTEIN (PTHR48007:SF37)
POPTR_005G254100v3	Glyceraldehyde-3-phosphate dehydrogenase;POPTR_005G254100;PTN008098050;orthologs	GLYCERALDEHYDE-3-PHOSPHATE DEHYDROGENASE GAPB, CHLOROPLASTIC (PTHR43148:SF5)
POPTR_014G024700v3	Kinesin motor domain-containing protein;POPTR_014G024700;PTN008258587;orthologs	KINESIN-LIKE PROTEIN KIN-4A (PTHR47969:SF15)
POPTR_018G127800v3	Auxin-responsive protein;POPTR_018G127800;PTN002064925;orthologs	AUXIN-RESPONSIVE PROTEIN IAA29 (PTHR31734:SF38)
POPTR_011G087200v3	Uncharacterized protein;POPTR_011G087200;PTN001840453;orthologs	GDP-L-GALACTOSE PHOSPHORYLASE 1 (PTHR20884:SF21)
POPTR_003G216400v3	Dirigent protein;POPTR_003G216400;PTN002329013;orthologs	DIRIGENT PROTEIN (PTHR21495:SF246)
POPTR_013G090300v3	WRKY domain-containing protein;POPTR_013G090300;PTN004796518;orthologs	WRKY TRANSCRIPTION FACTOR 70-RELATED (PTHR31282:SF110)
POPTR_017G147400v3	HMA domain-containing protein;POPTR_017G147400;PTN002335466;orthologs	COPPER TRANSPORT PROTEIN FAMILY-RELATED (PTHR45811:SF50)
POPTR_004G100000v3	Ribulose bisphosphate carboxylase small subunit;POPTR_004G100000;PTN007860238;orthologs	RIBULOSE BISPHOSPHATE CARBOXYLASE SMALL SUBUNIT 1B, CHLOROPLASTIC-RELATED (PTHR31262:SF10)
POPTR_008G032500v3	Uncharacterized protein;POPTR_008G032500;PTN002124205;orthologs	DUF1635 FAMILY PROTEIN (PTHR33431:SF2)
POPTR_010G207700v3	Uncharacterized protein;POPTR_010G207700;PTN002029478;orthologs	ACT DOMAIN-CONTAINING PROTEIN ACR9 (PTHR31096:SF65)
POPTR_015G076200v3	1-deoxy-D-xylulose-5-phosphate reductoisomerase;POPTR_015G076200;PTN004742728;orthologs	1-DEOXY-D-XYLULOSE 5-PHOSPHATE REDUCTOISOMERASE, CHLOROPLASTIC (PTHR30525:SF0)
POPTR_005G176200v3	WAT1-related protein;POPTR_005G176200;PTN004780749;orthologs	WAT1-RELATED PROTEIN (PTHR31218:SF289)
POPTR_005G045100v3	Sodium/hydrogen exchanger;POPTR_005G045100;PTN001603957;orthologs	SODIUM/HYDROGEN EXCHANGER 2 (PTHR10110:SF117)
POPTR_002G084800v3	Uncharacterized protein;POPTR_002G084800;PTN001915824;orthologs	LYSM DOMAIN-CONTAINING GPI-ANCHORED PROTEIN 1 (PTHR33734:SF35)
POPTR_002G101300v3	Phytocyanin domain-containing protein;POPTR_002G101300;PTN002093185;orthologs	PHYTOCYANIN DOMAIN-CONTAINING PROTEIN (PTHR33021:SF193)
POPTR_001G027000v3	Response regulatory domain-containing protein;POPTR_001G027000;PTN005187111;orthologs	TWO-COMPONENT RESPONSE REGULATOR ORR4 (PTHR43874:SF106)
POPTR_018G027700v3	F-box domain-containing protein;POPTR_018G027700;PTN002364576;orthologs	EIN3-BINDING F-BOX PROTEIN 1 (PTHR13318:SF88)
POPTR_018G130100v3	TPR_REGION domain-containing protein;POPTR_018G130100;PTN001980538;orthologs	F18B13.21 PROTEIN (PTHR26312:SF168)
POPTR_017G015700v3	Uncharacterized protein;POPTR_017G015700;PTN008048707;orthologs	SERINE/THREONINE-PROTEIN KINASE CLKA-RELATED (PTHR35274:SF5)
POPTR_003G136100v3	Protein kinase domain-containing protein;POPTR_003G136100;PTN001996351;orthologs	PROTEIN KINASE DOMAIN-CONTAINING PROTEIN (PTHR48010:SF6)
POPTR_008G056000v3	(1-3)-beta-glucan endohydrolase;POPTR_008G056000;PTN002084956;orthologs	(1-3)-BETA-GLUCAN ENDOHYDROLASE (PTHR32227:SF428)
POPTR_014G032600v3	Abhydrolase_3 domain-containing protein;POPTR_014G032600;PTN002346253;orthologs	ABHYDROLASE_3 DOMAIN-CONTAINING PROTEIN (PTHR23024:SF458)
POPTR_002G118800v3	Uncharacterized protein;POPTR_002G118800;PTN002359573;orthologs	ARM REPEAT SUPERFAMILY PROTEIN (PTHR23315:SF64)
POPTR_001G062500v3	Tify domain-containing protein;POPTR_001G062500;PTN007971110;orthologs	PROTEIN TIFY 9 (PTHR33077:SF5)
POPTR_005G214000v3	Uncharacterized protein;POPTR_005G214000;PTN001911018;orthologs	PROTEIN LIFEGUARD 4 (PTHR23291:SF31)
POPTR_008G137700v3	RING-type E3 ubiquitin transferase;POPTR_008G137700;PTN004573857;orthologs	ARM REPEAT SUPERFAMILY PROTEIN (PTHR22849:SF139)
POPTR_001G108800v3	DUF4005 domain-containing protein;POPTR_001G108800;PTN002426942;orthologs	PROTEIN IQ-DOMAIN 22 (PTHR32295:SF11)
POPTR_001G133000v3	Glycosyltransferase;POPTR_001G133000;PTN005361088;orthologs	GLYCOSYLTRANSFERASE (PTHR48047:SF131)
POPTR_001G044500v3	WRKY40 transcription factor;POPTR_001G044500;PTN002049126;orthologs	WRKY TRANSCRIPTION FACTOR 40-RELATED (PTHR31429:SF3)
POPTR_012G082700v3	Uncharacterized protein;POPTR_012G082700;PTN008103405;orthologs	ANTHRANILATE PHOSPHORIBOSYLTRANSFERASE (PTHR43285:SF2)
POPTR_016G065600v3	Uncharacterized protein;POPTR_016G065600;PTN002293802;orthologs	PROTEIN DOWNSTREAM NEIGHBOR OF SON (PTHR12972:SF0)
POPTR_018G066400v3	Uncharacterized protein;POPTR_018G066400;PTN002267920;orthologs	CYTIDINE DEAMINASE (PTHR11644:SF2)
POPTR_011G114600v3	Uncharacterized protein;POPTR_011G114600;PTN002139786;orthologs	SIGNALING PEPTIDE TAXIMIN 2 (PTHR33834:SF4)
POPTR_010G083300v3	NAB domain-containing protein;POPTR_010G083300;PTN002426694;orthologs	PROTEIN NETWORKED 1A (PTHR32258:SF6)
POPTR_015G135600v3	Protein DETOXIFICATION;POPTR_015G135600;PTN002256931;orthologs	PROTEIN DETOXIFICATION 49 (PTHR11206:SF374)
POPTR_009G028800v3	Uncharacterized protein;POPTR_009G028800;PTN004751926;orthologs	PATHOGENESIS-RELATED THAUMATIN SUPERFAMILY PROTEIN (PTHR31048:SF117)
POPTR_016G005300v3	C2 domain-containing protein;POPTR_016G005300;PTN001903452;orthologs	PROTEIN C2-DOMAIN ABA-RELATED 11 (PTHR45933:SF6)
POPTR_007G038500v3	Reticulon-like protein;POPTR_007G038500;PTN004215000;orthologs	RETICULON-LIKE PROTEIN B13 (PTHR10994:SF145)
POPTR_014G073100v3	Abhydrolase_3 domain-containing protein (Fragment);POPTR_014G073100;PTN004595081;orthologs	CARBOXYLESTERASE 8-RELATED (PTHR23024:SF113)
POPTR_001G454500v3	Trihelix family protein;POPTR_001G454500;PTN004553194;orthologs	SI:DKEY-66I24.7 (PTHR21654:SF84)
POPTR_002G190400v3	PPM-type phosphatase domain-containing protein;POPTR_002G190400;PTN002302094;orthologs	PROTEIN PHOSPHATASE 2C 49-RELATED (PTHR13832:SF165)
POPTR_005G232500v3	Uncharacterized protein;POPTR_005G232500;PTN008231209;orthologs	SUBFAMILY NOT NAMED (PTHR47293:SF74)
POPTR_003G122400v3	GRAS family protein;POPTR_003G122400;PTN002057492;orthologs	SCARECROW-LIKE PROTEIN 28 (PTHR31636:SF16)
POPTR_019G020500v3	BED-type domain-containing protein;POPTR_019G020500;PTN007738127;orthologs	DISEASE RESISTANCE PROTEIN RFL1-RELATED (PTHR23155:SF1032)
POPTR_001G377900v3	Uncharacterized protein;POPTR_001G377900;PTN002437425;orthologs	INTERACTOR OF CONSTITUTIVE ACTIVE ROPS 4 (PTHR34224:SF2)
POPTR_013G005900v3	Hexosyltransferase;POPTR_013G005900;PTN002256534;orthologs	GALACTINOL SYNTHASE 10 (PTHR11183:SF184)
POPTR_007G043700v3	Uncharacterized protein;POPTR_007G043700;PTN002438917;orthologs	RED CHLOROPHYLL CATABOLITE REDUCTASE-LIKE (PTHR34685:SF3)
POPTR_004G041000v3	Uncharacterized protein;POPTR_004G041000;PTN001789392;orthologs	CBS (PTHR13780:SF39)
POPTR_016G032000v3	Uncharacterized protein;POPTR_016G032000;PTN001703474;orthologs	NITRITE TRANSPORTER (PTHR11654:SF393)
POPTR_008G061000v3	Homeobox domain-containing protein;POPTR_008G061000;PTN004313620;orthologs	BEL1-LIKE HOMEODOMAIN PROTEIN 9 (PTHR11850:SF247)
POPTR_005G160800v3	ENTH domain-containing protein;POPTR_001G431800;PTN001881742;orthologs	ENTH DOMAIN-CONTAINING PROTEIN (PTHR22951:SF24)
POPTR_002G123400v3	Uncharacterized protein;POPTR_002G123400;PTN002441005;orthologs	OS02G0158600 PROTEIN (PTHR35513:SF1)
POPTR_004G044700v3	Uncharacterized protein;POPTR_004G044700;PTN002055897;orthologs	POLLEN OLE E 1 ALLERGEN AND EXTENSIN FAMILY PROTEIN (PTHR33470:SF22)
POPTR_008G019200v3	AMMECR1 domain-containing protein;POPTR_008G019200;PTN004398036;orthologs	AMMECR NUCLEAR PROTEIN 1 (PTHR13016:SF0)
POPTR_001G110200v3	Elongation factor Tu;POPTR_001G110200;PTN001897520;orthologs	ELONGATION FACTOR TU, CHLOROPLASTIC (PTHR43721:SF5)
POPTR_002G157700v3	Uncharacterized protein;POPTR_002G157700;PTN002066755;orthologs	REMORIN_C DOMAIN-CONTAINING PROTEIN (PTHR31775:SF31)
POPTR_002G015500v3	Uncharacterized protein;POPTR_002G015500;;orthologs
POPTR_012G077800v3	Uncharacterized protein;POPTR_012G077800;PTN004662116;orthologs	RAC-LIKE GTP-BINDING PROTEIN ARAC10-RELATED (PTHR24072:SF149)
POPTR_001G292900v3	Uncharacterized protein;POPTR_001G292900;PTN004680022;orthologs	LIM DOMAIN-CONTAINING PROTEIN WLIM1-LIKE (PTHR24206:SF35)
POPTR_005G082200v3	Protein kinase domain-containing protein;POPTR_005G082200;PTN001907322;orthologs	OS05G0519200 PROTEIN (PTHR44329:SF73)
POPTR_010G130800v3	Uncharacterized protein;POPTR_010G130800;PTN007869605;orthologs	PROTEIN CHUP1, CHLOROPLASTIC (PTHR31342:SF7)
POPTR_008G156000v3	Protein kinase domain-containing protein;POPTR_008G156000;PTN002356175;orthologs	KINASE-LIKE PROTEIN (PTHR44329:SF228)
POPTR_006G117200v3	Protein kinase domain-containing protein;POPTR_006G117200;PTN001996271;orthologs	LEUCINE-RICH REPEAT RECEPTOR-LIKE PROTEIN KINASE PXC1 (PTHR48007:SF4)
POPTR_001G294800v3	Uncharacterized protein;POPTR_001G294800;PTN002212398;orthologs	BETA-1,4-XYLOSIDASE (PTHR38370:SF1)
POPTR_011G080900v3	Uncharacterized protein ycf23;POPTR_011G080900;PTN008071811;orthologs	YCF23 PROTEIN (PTHR36895:SF1)
POPTR_019G039000v3	Protein kinase domain-containing protein;POPTR_019G039000;PTN002406319;orthologs	OS07G0166700 PROTEIN (PTHR27003:SF468)
POPTR_008G092000v3	Eukaryotic translation initiation factor 5A;POPTR_008G092000;PTN001705874;orthologs	TRANSLATION ELONGATION FACTOR IF5A-RELATED (PTHR11673:SF48)
POPTR_010G107000v3	LRRNT_2 domain-containing protein;POPTR_010G107000;PTN001993461;orthologs	OS02G0161500 PROTEIN (PTHR27004:SF323)
POPTR_001G331700v3	Uncharacterized protein;POPTR_001G331700;PTN001706968;orthologs	CHLORIDE CHANNEL PROTEIN CLC-A (PTHR11689:SF67)
POPTR_004G230000v3	TIR domain-containing protein;POPTR_004G230000;PTN002538019;orthologs	MRGH14 (PTHR32009:SF39)
POPTR_008G174100v3	Beta-amylase;POPTR_008G174100;PTN004810008;orthologs	BETA-AMYLASE 1, CHLOROPLASTIC (PTHR31352:SF31)
POPTR_012G131800v3	Protein-serine/threonine phosphatase;POPTR_012G131800;PTN004439442;orthologs	PROTEIN PHOSPHATASE 2C 75-RELATED (PTHR47992:SF141)
POPTR_010G107300v3	Nudix hydrolase domain-containing protein;POPTR_010G107300;PTN002290132;orthologs	NUDIX HYDROLASE 17, MITOCHONDRIAL (PTHR12629:SF62)
POPTR_016G137900v3	WRKY family protein;POPTR_016G137900;PTN004796558;orthologs	WRKY DOMAIN-CONTAINING PROTEIN (PTHR31282:SF85)
POPTR_007G004900v3	Uncharacterized protein;POPTR_007G004900;PTN005326824;orthologs	EMBRYO SPECIFIC2 (PTHR46935:SF2)
POPTR_011G142700v3	RING-type domain-containing protein;POPTR_011G142700;PTN005124958;orthologs	BOI-RELATED E3 UBIQUITIN-PROTEIN LIGASE 3-RELATED (PTHR42647:SF32)
POPTR_017G140900v3	Uncharacterized protein;POPTR_017G140900;PTN004141325;orthologs	MICROSOMAL GLUTATHIONE S-TRANSFERASE (PTHR10250:SF22)
POPTR_005G102300v3	Aa_trans domain-containing protein;POPTR_005G102300;PTN002342850;orthologs	AMINO ACID TRANSPORTER AVT3A (PTHR22950:SF674)
POPTR_001G421300v3	POLAc domain-containing protein;POPTR_001G421300;PTN004127690;orthologs	DNA POLYMERASE NU (PTHR10133:SF27)
POPTR_001G102400v3	Uncharacterized protein;POPTR_001G102400;PTN004750831;orthologs	OSMOTIN-LIKE PROTEIN OSM34 (PTHR31048:SF196)
POPTR_019G085400v3	C2H2-type domain-containing protein;POPTR_019G085400;PTN001973368;orthologs	PROTEIN SENSITIVE TO PROTON RHIZOTOXICITY 1 (PTHR46352:SF1)
POPTR_018G025900v3	AAI domain-containing protein;POPTR_018G025900;PTN002064593;orthologs	BIFUNCTIONAL INHIBITOR/LIPID-TRANSFER PROTEIN/SEED STORAGE 2S ALBUMIN SUPERFAMILY PROTEIN (PTHR31731:SF19)
POPTR_005G239300v3	Chlorophyll a-b binding protein, chloroplastic;POPTR_005G239300;PTN001855360;orthologs	CHLOROPHYLL A-B BINDING PROTEIN 1, CHLOROPLASTIC-RELATED (PTHR21649:SF175)
POPTR_012G108400v3	Uncharacterized protein;POPTR_012G108400;PTN007458809;orthologs	60S RIBOSOMAL PROTEIN L34-1-RELATED (PTHR10759:SF5)
POPTR_012G014500v3	Pectinesterase;POPTR_012G014500;PTN002421195;orthologs	PECTINESTERASE/PECTINESTERASE INHIBITOR 34-RELATED (PTHR31707:SF8)
POPTR_007G000900v3	HMG box domain-containing protein;POPTR_007G000900;PTN002300254;orthologs	MEIOSIS INITIATOR PROTEIN (PTHR47658:SF1)
POPTR_012G071100v3	Protein kinase domain-containing protein;POPTR_012G071100;PTN005267310;orthologs	LEUCINE-RICH REPEAT PROTEIN KINASE FAMILY PROTEIN (PTHR45974:SF28)
POPTR_004G180500v3	Uncharacterized protein;POPTR_004G180500;PTN004294558;orthologs	MULTI-COPPER OXIDASE TYPE I FAMILY PROTEIN-RELATED (PTHR11709:SF267)
POPTR_002G262900v3	Uncharacterized protein;POPTR_002G262900;PTN005076655;orthologs	OS06G0115200 PROTEIN (PTHR35464:SF1)
POPTR_005G230100v3	S-adenosyl-L-methionine:jasmonic acid carboxyl methyltransferase;JMT1;PTN002025347;orthologs	JASMONATE O-METHYLTRANSFERASE (PTHR31009:SF91)
POPTR_012G011700v3	Glutamine amidotransferase type-2 domain-containing protein;POPTR_012G011700;PTN007552070;orthologs	GLUTAMINE AMIDOTRANSFERASE TYPE-2 DOMAIN-CONTAINING PROTEIN (PTHR11938:SF133)
POPTR_009G097100v3	Uncharacterized protein;POPTR_009G097100;PTN005266747;orthologs	LRRNT_2 DOMAIN-CONTAINING PROTEIN (PTHR45974:SF248)
POPTR_017G110700v3	Abhydrolase_3 domain-containing protein;POPTR_017G110700;PTN002346332;orthologs	ISOPRENYLCYSTEINE ALPHA-CARBONYL METHYLESTERASE ICME (PTHR23024:SF583)
POPTR_001G059100v3	Uncharacterized protein;POPTR_001G059100;PTN002439640;orthologs	PROTEIN LAZY 1 (PTHR34959:SF3)
POPTR_003G121200v3	AP2/ERF domain-containing protein;POPTR_003G121200;PTN002076491;orthologs	OS02G0676800 PROTEIN (PTHR31985:SF242)
POPTR_015G070700v3	Uncharacterized protein;POPTR_015G070700;PTN002121716;orthologs	OS02G0740600 PROTEIN (PTHR33386:SF5)
POPTR_012G077300v3	Uncharacterized protein;POPTR_012G077300;PTN002433755;orthologs	DUF4228 DOMAIN PROTEIN (PTHR33413:SF33)
POPTR_004G157300v3	DUF4408 domain-containing protein;POPTR_004G157300;PTN005015636;orthologs	TRANSMEMBRANE PROTEIN (PTHR33640:SF8)
POPTR_018G113700v3	Uncharacterized protein;POPTR_018G113700;PTN002171677;orthologs	BNAC04G52100D PROTEIN (PTHR35121:SF2)
POPTR_001G170500v3	Uncharacterized protein;POPTR_001G170500;PTN002434490;orthologs	PROTEIN BIG GRAIN 1-LIKE A (PTHR33541:SF28)
POPTR_007G109200v3	Uncharacterized protein;POPTR_007G109200;PTN002165373;orthologs	EXPRESSED PROTEIN (PTHR34808:SF2)
POPTR_001G173200v3	Uncharacterized protein;POPTR_001G173000;PTN001906365;orthologs	LATE EMBRYOGENESIS ABUNDANT PROTEIN 29 (PTHR47372:SF49)
POPTR_001G317600v3	Sucrose-phosphate synthase;POPTR_001G317600;PTN001754933;orthologs	SUCROSE-PHOSPHATE SYNTHASE 3-RELATED (PTHR46039:SF5)
POPTR_010G012000v3	Uncharacterized protein;POPTR_010G012000;PTN002157289;orthologs	SUBFAMILY NOT NAMED (PTHR34460:SF2)
POPTR_003G045000v3	Uncharacterized protein;POPTR_003G045000;PTN005045693;orthologs	EARLY FLOWERING PROTEIN (PTHR34281:SF7)
POPTR_016G124900v3	Ferritin;POPTR_016G124900;PTN004258154;orthologs	FERRITIN-2, CHLOROPLASTIC (PTHR11431:SF101)
POPTR_004G117900v3	tRNA (guanine(26)-N(2))-dimethyltransferase;POPTR_004G117900;PTN004174568;orthologs	TRNA (GUANINE(26)-N(2))-DIMETHYLTRANSFERASE (PTHR10631:SF3)
POPTR_001G125800v3	Uncharacterized protein;POPTR_001G125800;PTN004416334;orthologs	ALDO_KET_RED DOMAIN-CONTAINING PROTEIN (PTHR13318:SF124)
POPTR_010G147400v3	Uncharacterized protein;POPTR_010G147400;PTN002105744;orthologs	TRANSCRIPTION FACTOR BHLH148 (PTHR33124:SF12)
POPTR_006G006100v3	Uncharacterized protein;POPTR_006G006100;PTN001867995;orthologs	HEAVY METAL-ASSOCIATED DOMAIN CONTAINING PROTEIN, EXPRESSED (PTHR46195:SF10)
POPTR_002G201000v3	Uncharacterized protein;POPTR_002G201000;PTN004673447;orthologs	KINESIN-LIKE PROTEIN KIN-14I (PTHR47972:SF39)
POPTR_015G070000v3	Response regulatory domain-containing protein;POPTR_015G070000;PTN002466780;orthologs	TWO-COMPONENT RESPONSE REGULATOR ARR6 (PTHR43874:SF62)
POPTR_002G039100v3	AP2/ERF domain-containing protein;POPTR_002G039100;PTN002033427;orthologs	ETHYLENE-RESPONSIVE TRANSCRIPTION FACTOR 15 (PTHR31190:SF72)
POPTR_019G003800v3	FAD_binding_3 domain-containing protein;POPTR_019G003800;PTN005262268;orthologs	OS04G0423100 PROTEIN (PTHR45934:SF1)
POPTR_018G097700v3	Glyco_transf_20 domain-containing protein;POPTR_018G097700;PTN002244240;orthologs	ALPHA,ALPHA-TREHALOSE-PHOSPHATE SYNTHASE [UDP-FORMING] 11-RELATED (PTHR10788:SF46)
POPTR_014G175600v3	PSI subunit V;POPTR_014G175600;PTN002165207;orthologs	PHOTOSYSTEM I REACTION CENTER SUBUNIT XI, CHLOROPLASTIC (PTHR34803:SF2)
POPTR_017G051800v3	Uncharacterized protein;POPTR_017G051800;PTN002088402;orthologs	2-NITROPROPANE DIOXYGENASE-LIKE PROTEIN (PTHR32332:SF20)
POPTR_015G007600v3	Cytochrome b5 heme-binding domain-containing protein;POPTR_015G007600;PTN004513223;orthologs	CYTOCHROME B5 ISOFORM E (PTHR19359:SF135)
POPTR_002G032900v3	Inositol-pentakisphosphate 2-kinase;POPTR_002G032900;PTN002307443;orthologs	INOSITOL-PENTAKISPHOSPHATE 2-KINASE (PTHR14456:SF2)
POPTR_001G310500v3	GTP cyclohydrolase II;POPTR_001G310500;PTN004539157;orthologs	3,4-DIHYDROXY-2-BUTANONE 4-PHOSPHATE SYNTHASE (PTHR21327:SF18)
POPTR_016G131800v3	Uncharacterized protein;POPTR_016G131800;PTN002414306;orthologs	SUBFAMILY NOT NAMED (PTHR31087:SF73)
POPTR_001G128200v3	Nodulin-like domain-containing protein;POPTR_001G128200;PTN004548893;orthologs	MAJOR FACILITATOR SUPERFAMILY PROTEIN (PTHR21576:SF7)
POPTR_003G215400v3	RING-type E3 ubiquitin transferase;POPTR_003G215400;PTN001618689;orthologs	RING-TYPE E3 UBIQUITIN TRANSFERASE (PTHR10315:SF147)
POPTR_002G248500v3	BHLH domain-containing protein;POPTR_002G248500;PTN002289132;orthologs	BHLH TRANSCRIPTION FACTOR (PTHR12565:SF426)
POPTR_010G224800v3	N-acetyltransferase domain-containing protein;POPTR_010G224800;PTN002237878;orthologs	DIAMINE ACETYLTRANSFERASE 1 (PTHR10545:SF29)
POPTR_013G085300v3	Uncharacterized protein;POPTR_013G085300;PTN005095792;orthologs	PROTEIN, PUTATIVE (DUF2358)-RELATED (PTHR36334:SF1)
POPTR_005G163700v3	Uncharacterized protein;POPTR_005G163700;PTN002039919;orthologs	PHOSPHATE-RESPONSIVE 1 FAMILY PROTEIN (PTHR31279:SF66)
POPTR_006G131300v3	AB hydrolase-1 domain-containing protein;POPTR_006G131300;PTN002251115;orthologs	ALPHA/BETA-HYDROLASES SUPERFAMILY PROTEIN (PTHR45763:SF8)
POPTR_004G170400v3	Uncharacterized protein;POPTR_004G170400;PTN001900718;orthologs	NB-ARC DOMAIN-CONTAINING PROTEIN (PTHR23155:SF1139)
POPTR_010G166200v3	NAC domain-containing protein;POPTR_010G166200;PTN002063561;orthologs	NAC DOMAIN-CONTAINING PROTEIN 2 (PTHR31719:SF127)
POPTR_006G068200v3	TPR_REGION domain-containing protein;POPTR_006G068200;PTN001980536;orthologs	F18B13.21 PROTEIN (PTHR26312:SF168)
POPTR_006G216900v3	SEC7 domain-containing protein;POPTR_006G216900;PTN004181470;orthologs	BREFELDIN A-INHIBITED GUANINE NUCLEOTIDE-EXCHANGE PROTEIN 5 (PTHR10663:SF312)
POPTR_013G064300v3	Protein kinase domain-containing protein;POPTR_013G064300;PTN007807599;orthologs	OS07G0166700 PROTEIN (PTHR27003:SF468)
POPTR_014G070100v3	Uncharacterized protein;POPTR_014G070100;PTN002320363;orthologs	PUTATIVE-RELATED (PTHR19321:SF47)
POPTR_005G203800v3	Uncharacterized protein;POPTR_005G203800;PTN005021445;orthologs	TRANSMEMBRANE PROTEIN (PTHR33726:SF8)
POPTR_001G102200v3	Uncharacterized protein;POPTR_001G102200;PTN002422198;orthologs	HYDROXYPROLINE-RICH GLYCOPROTEIN FAMILY PROTEIN (PTHR31798:SF2)
POPTR_012G005100v3	Uncharacterized protein;POPTR_012G005100;PTN004627545;orthologs	UNC93-LIKE PROTEIN C922.05C (PTHR23294:SF59)
POPTR_001G469600v3	J domain-containing protein;POPTR_001G469600;PTN002376775;orthologs	J DOMAIN-CONTAINING PROTEIN (PTHR45432:SF6)
POPTR_006G189600v3	Uncharacterized protein;POPTR_006G189600;PTN002171678;orthologs	BNAC04G52100D PROTEIN (PTHR35121:SF2)
POPTR_016G085900v3	Uncharacterized protein;POPTR_016G085900;PTN002437423;orthologs	INTERACTOR OF CONSTITUTIVE ACTIVE ROPS 2, CHLOROPLASTIC (PTHR34224:SF4)
POPTR_012G014000v3	CCT domain-containing protein;POPTR_012G014000;PTN007909992;orthologs	CCT MOTIF FAMILY PROTEIN (PTHR31717:SF2)
POPTR_003G138000v3	Uncharacterized protein;POPTR_003G138000;PTN005325676;orthologs	HIGH MOBILITY GROUP B PROTEIN 13 (PTHR46912:SF1)
POPTR_011G103900v3	Alpha,alpha-trehalose-phosphate synthase (UDP-forming);POPTR_011G103900;PTN007461429;orthologs	BCDNA.GH08860 (PTHR10788:SF106)
POPTR_008G060100v3	NTP_transferase domain-containing protein;POPTR_008G060100;PTN001859815;orthologs	MANNOSE-1-PHOSPHATE GUANYLTRANSFERASE BETA (PTHR22572:SF15)
POPTR_005G063300v3	Uncharacterized protein;POPTR_005G063300;PTN008071246;orthologs	PHOTOSYSTEM I REACTION CENTER SUBUNIT N, CHLOROPLASTIC (PTHR36814:SF1)
POPTR_015G144400v3	CAP10 domain-containing protein;POPTR_015G144400;PTN004342525;orthologs	OS04G0534100 PROTEIN (PTHR12203:SF99)
POPTR_001G472800v3	Uncharacterized protein;POPTR_001G472800;PTN007852980;orthologs	WRKY TRANSCRIPTION FACTOR 2-RELATED (PTHR31221:SF318)
POPTR_013G008200v3	Uncharacterized protein;POPTR_013G008200;PTN004621453;orthologs	OS01G0300900 PROTEIN (PTHR23244:SF455)
POPTR_016G112300v3	Uncharacterized protein;POPTR_016G112300;PTN002377340;orthologs	DUPLICATED HOMEODOMAIN-LIKE SUPERFAMILY PROTEIN (PTHR44042:SF58)
POPTR_001G449500v3	Glyco_transf_5 domain-containing protein;POPTR_001G449500;PTN008167312;orthologs	GRANULE-BOUND STARCH SYNTHASE 1, CHLOROPLASTIC/AMYLOPLASTIC (PTHR45825:SF3)
POPTR_013G057500v3	Uncharacterized protein;POPTR_013G057500;PTN005037665;orthologs	ARABINOGALACTAN PEPTIDE 13 (PTHR34114:SF11)
POPTR_013G029500v3	Uncharacterized protein;POPTR_013G029500;PTN002376126;orthologs	DUF3444 DOMAIN-CONTAINING PROTEIN (PTHR45089:SF42)
POPTR_017G108300v3	Uncharacterized protein;POPTR_017G108300;PTN002437229;orthologs	STRESS-INDUCED PROTEIN KIN2-LIKE (PTHR34191:SF23)
POPTR_015G039500v3	Uncharacterized protein;POPTR_015G039500;PTN001655608;orthologs	CALCIUM-BINDING PROTEIN CML27-RELATED (PTHR10891:SF814)
POPTR_006G021700v3	OTU domain-containing protein;POPTR_006G021700;PTN001752287;orthologs	OS06G0669800 PROTEIN (PTHR12419:SF85)
POPTR_003G087600v3	Methyltransferase;POPTR_003G087600;PTN001603601;orthologs	METHYLTRANSFERASE PMT14-RELATED (PTHR10108:SF1104)
POPTR_011G147400v3	Myb-like domain-containing protein;POPTR_011G147400;PTN004553193;orthologs	SI:DKEY-66I24.7 (PTHR21654:SF84)
POPTR_001G264000v3	DNA topoisomerase 2;POPTR_001G264000;PTN004130143;orthologs	DNA TOPOISOMERASE 2 (PTHR10169:SF38)
POPTR_005G243000v3	Uncharacterized protein;POPTR_005G243000;PTN007463182;orthologs	CO(2)-RESPONSE SECRETED PROTEASE (PTHR10795:SF769)
POPTR_001G190200v3	Uncharacterized protein;POPTR_001G190200;PTN005287267;orthologs	LYSM DOMAIN RECEPTOR-LIKE KINASE 3 (PTHR46204:SF10)
POPTR_003G165000v3	Tify domain-containing protein;POPTR_003G165000;PTN002429740;orthologs	PROTEIN TIFY 9 (PTHR33077:SF5)
POPTR_014G146700v3	Aa_trans domain-containing protein;POPTR_014G146700;PTN004586498;orthologs	AMINO ACID TRANSPORTER AVT1H (PTHR48017:SF169)
POPTR_018G060000v3	Uncharacterized protein;POPTR_018G060000;PTN001603682;orthologs	S-ADENOSYL-L-METHIONINE-DEPENDENT METHYLTRANSFERASES SUPERFAMILY PROTEIN (PTHR43832:SF1)
POPTR_013G040700v3	BZIP domain-containing protein;POPTR_013G040700;PTN005303134;orthologs	BASIC LEUCINE ZIPPER 63 (PTHR46408:SF10)
POPTR_009G101400v3	Uncharacterized protein;POPTR_009G101400;PTN002435104;orthologs	COLD-REGULATED PROTEIN 28 (PTHR33676:SF17)
POPTR_016G093100v3	Uncharacterized protein;POPTR_016G093100;PTN008205229;orthologs	HEAVY METAL-ASSOCIATED ISOPRENYLATED PLANT PROTEIN 6 (PTHR46413:SF1)
POPTR_016G003700v3	NPH3 domain-containing protein;POPTR_016G003700;PTN002427268;orthologs	NPH3 DOMAIN-CONTAINING PROTEIN (PTHR32370:SF106)
POPTR_014G086900v3	Receptor-like serine/threonine-protein kinase;POPTR_014G086900;PTN005396927;orthologs	G-TYPE LECTIN S-RECEPTOR-LIKE SERINE/THREONINE-PROTEIN KINASE SD2-2 (PTHR47975:SF22)
POPTR_003G121500v3	Uncharacterized protein;POPTR_003G121500;PTN002285588;orthologs	BAG FAMILY MOLECULAR CHAPERONE REGULATOR-LIKE PROTEIN (PTHR12329:SF36)
POPTR_008G154600v3	FLZ-type domain-containing protein;POPTR_008G154600;PTN008205977;orthologs	FCS-LIKE ZINC FINGER 8 (PTHR46443:SF21)
POPTR_016G138300v3	Uncharacterized protein;POPTR_016G138300;PTN005105519;orthologs	MYELIN TRANSCRIPTION FACTOR (PTHR36790:SF1)
POPTR_016G132200v3	Uncharacterized protein;POPTR_016G132200;PTN002279514;orthologs	ALANINE--GLYOXYLATE AMINOTRANSFERASE 2-LIKE (PTHR45688:SF13)
POPTR_003G117800v3	TPX2_importin domain-containing protein;POPTR_003G117800;PTN002307017;orthologs	OS06G0130200 PROTEIN (PTHR14326:SF15)
[truncated: 1,216 more rows]

## Sheet: Tab S. 9
Table S9. List of differentially expressed genes (DEGs) detected in cambium and differentiating xylem tissues isolated from 4-years-old transgenic aspen Line 4 growing in the field conditions not identified in PANTHER.ORG.
[truncated: 342 more rows]

[truncated: 7 more sheets: Tab S. 10, Tab S. 11, Tab S. 12, Tab S. 13, Tab S. 14, Tab S. 15, Tab S. 16]
